# Supplementary material for: Stereodivergent, Diels–Alder-initiated organocascades employing α,β-unsaturated acylammonium salts: scope, mechanism, and application
Source: PubMed Central journal article supplement (PMC5460596; doi:10.1039/c6sc04273b), 2016-10-21
Supplement: SC-008-C6SC04273B-s001.pdf [file SC-008-C6SC04273B-s001.pdf]

## Stereodivergent, Diels-Alder-Initiated Organocascades Employing $\alpha,\beta$ -Unsaturated Acylammonium Salts: Scope, Mechanism, and Application

Mikail E. Abbasov,<sup>†</sup> Brandi M. Hudson,<sup>‡</sup> Dean J. Tantillo<sup>‡,\*</sup> and Daniel Romo<sup>†,\*</sup>

<sup>†</sup>*Department of Chemistry and Biochemistry, Baylor University, One Bear Place 97348, Waco, Texas 76798, United States*

<sup>‡</sup>*Department of Chemistry, University of California–Davis, One Shields Avenue, Davis, California 95616, United States*

### Table of Contents

- General procedures and abbreviation list .....S2–S3
- Experimental procedures .....S4–S28
  - Preparation of compounds **S3**, **S4**, **S6**, **S9**, **S10**, ( $\pm$ )-**13a**, ( $\pm$ )-**13b**, ( $\pm$ )-**13c**, ( $\pm$ )-**13e**
  - Representative procedure for the stereodivergent DAL process as described for bicyclic  $\gamma$ -lactones (–)-**14a** and (+)-**14a'**
  - Representative examples of unsuccessful DAL processes (**Table S1**)
  - Synthetic applications of  $\gamma$ -lactone (–)-**14d**
  - Synthesis of the isothioureia catalysts (*R*)-(+)–**NBTM** and (*R*)-(+)–**PBTM**
  - Representative procedure for the enantioselective and stereodivergent DAL process leading to a full stereoisomeric complement as described for bicyclic  $\gamma$ -lactones (–)-**14e**, (+)-**14e'**, (+)-**14e''** and (–)-**14e'''**
- Single crystal X-ray structures and selected crystallographic data for amide (–)-**S20** (**Figures S1**) ..... S29
- Chiral HPLC traces for compounds **14a-d**, **14a'-d'**, (–)-**14e**, (+)-**14'e**, (+)-**14e''** and (–)-**14e'''** (**Figures S2 and S3**) ..... S33
- References ..... S44

## General Procedures

All non-aqueous reactions were performed under a nitrogen atmosphere in oven-dried glassware. Dichloromethane ( $\text{CH}_2\text{Cl}_2$ ), tetrahydrofuran (THF), diethyl ether ( $\text{Et}_2\text{O}$ ), acetonitrile ( $\text{CH}_3\text{CN}$ ) and toluene (PhMe) were dried by passing through activated alumina (solvent purification system). Diisopropylethylamine ( $\text{EtN}(\text{Pr})_2$ ) and triethylamine ( $\text{Et}_3\text{N}$ ) were distilled from calcium hydride prior to use. Other solvents and reagents were used as received from commercially available sources. Deuterated solvents were purchased from Cambridge Isotopes and used as received.  $^1\text{H}$  NMR spectra were measured at 500 MHz and referenced relative to residual chloroform (7.26 ppm) or benzene (7.16 ppm) and were reported in parts per million. Coupling constants ( $J$ ) were reported in Hertz (Hz), with multiplicity reported following usual convention: s, singlet; d, doublet; t, triplet; q, quartet; dd, doublet of doublets; dt, doublet of triplets; dq, doublet of quartets; qd, quartet of doublets; td, triplet of doublets; tt, triplet of triplets; ddd, doublet of doublet of doublets; ddt, doublet of doublet of triplets; ddq, doublet of doublet of quartets; dddd, doublet of doublet of doublet of doublets; ddddt, doublet of doublet of doublet of triplets; ddquint, doublet of doublet of quintets; m, multiplet; br s, broad singlet.  $^{13}\text{C}$  NMR spectra were measured at 125 MHz and referenced relative to residual chloroform (77.23 ppm) or benzene (128.06 ppm) and were reported in parts per million (ppm). Flash column chromatography was performed with 60Å Silica Gel (230-400 mesh) as stationary phase on an automated flash chromatography system (EtOAc/hexanes as eluent unless indicated otherwise). High-resolution mass spectra (ESI) were obtained through the Laboratory for Biological Mass Spectrometry (Texas A&M University). Thin Layer Chromatography (TLC) was performed using glass-backed silica gel F254 (Silicycle, 250  $\mu\text{m}$  thickness). Visualization of developed plates was performed by fluorescence quenching or by treating with Seebach's<sup>1</sup> staining solution. *Fourier Transform Infrared* (FTIR) spectra were recorded as thin films on NaCl plates. Optical rotations were recorded on a polarimeter at 589 nm employing a 25 mm cell. High Performance Liquid Chromatography (HPLC) was performed on a chromatographic system using various

chiral columns (25 cm) as noted. X-ray diffraction was obtained by the X-ray Diffraction Laboratory at Texas A&M University. (*S*)-(-)-BTM, (*R*)-(+)-BTM and (*S*)-(-)-TM•HCl were purchased from TCI chemicals and used as received. All unsaturated acid chlorides were purchased from Sigma-Aldrich and used as received without further purification.

### Abbreviation List

|                                           |   |                                                         |
|-------------------------------------------|---|---------------------------------------------------------|
| EtN( <sup><i>i</i></sup> Pr) <sub>2</sub> | = | <i>N,N</i> -diisopropylethylamine                       |
| Et <sub>3</sub> N                         | = | triethylamine                                           |
| DTBP                                      | = | 2,6-di- <i>tert</i> -butylpyridine                      |
| NaBH <sub>4</sub>                         | = | sodium borohydride                                      |
| MnO <sub>2</sub>                          | = | manganese(II) oxide                                     |
| K <sub>3</sub> PO <sub>4</sub>            | = | potassium phosphate tribasic                            |
| DIBAl-H                                   | = | diisobutylaluminum hydride                              |
| TIPSOTf                                   | = | triisopropylsilyl trifluoromethanesulfonate             |
| ( <i>S</i> )-(-)-BTM                      | = | ( <i>S</i> )-(-)-benzotetramisole                       |
| ( <i>R</i> )-(+)-BTM                      | = | ( <i>R</i> )-(+)-benzotetramisole                       |
| ( <i>S</i> )-(-)-TM•HCl                   | = | ( <i>S</i> )-(-)-tetramisole (levamisole) hydrochloride |

**Preparation of compounds S3, S4, S5, S8, S9, (±)-13a, (±)-13b, (±)-13c, (±)-13e:**

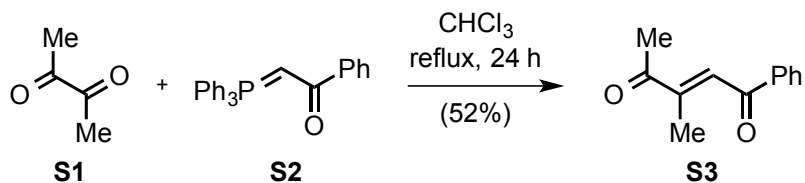

**(E)-3-methyl-1-phenylpenta-2,4-dien-1-one (S3):** To a solution of 2,3-butanedione **S1** (2.0 mL, 23.2 mmol, 1.0 equiv) in anhydrous CHCl<sub>3</sub> (77 mL) was added (benzoylmethylene)triphenylphosphorane **S2** (8.84 g, 23.2 mmol, 1.0 equiv) and refluxed (65-70 °C) for 24 h. After cooling to ambient temperature, the mixture was filtered through a short pad of celite and the filtrate was concentrated using rotary evaporation. The residue was then diluted with cold Et<sub>2</sub>O (50 mL), filtered through a plug of celite and washed with additional Et<sub>2</sub>O (25 mL). The filtrate was concentrated by rotary evaporation and purified by an automated flash chromatography system (5→15% EtOAc/hexanes) providing 2.24 g (52% yield) of diketone **S3** as a yellow oil: TLC (EtOAc:hexanes, 1:9 v/v):  $R_f = 0.42$ ; <sup>1</sup>H NMR (500 MHz, CDCl<sub>3</sub>):  $\delta$  7.95-7.93 (m, 2H), 7.62-7.58 (m, 1H), 7.51-7.48 (m, 2H), 7.44-7.42 (m, 1H), 2.47 (s, 3H), 2.07 (d,  $J = 1.4$  Hz, 3H); <sup>13</sup>C NMR (125 MHz; CDCl<sub>3</sub>):  $\delta$  200.1, 193.3, 147.0, 137.3, 133.9, 131.8, 129.0 (2), 128.7 (2), 26.4, 14.0; IR (thin film): 1681, 1668, 1597 cm<sup>-1</sup>; HRMS (ESI+)  $m/z$  calcd for C<sub>12</sub>H<sub>12</sub>LiO<sub>2</sub> [M+Li]<sup>+</sup>: 195.0997, found: 195.0988.

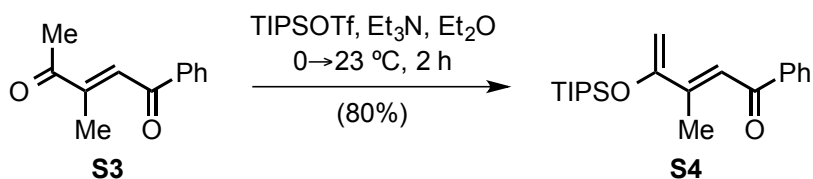

**(E)-3-methyl-1-phenyl-4-((triisopropylsilyloxy)methyl)penta-2,4-dien-1-one (S4):** To a solution of diketone **S3** (2.24 g, 11.9 mmol, 1.0 equiv) in anhydrous Et<sub>2</sub>O (40 mL) at 0 °C was added Et<sub>3</sub>N (2.5 mL, 17.9 mmol, 1.5 equiv) dropwise. After stirring for 10 min, TIPSOTf (3.8 mL, 14.3 mmol, 1.2 equiv) was added over a period of 30 min. The reaction was stirred for 30 min at 0 °C then allowed to warm to ambient temperature (23

°C) and stirred for 1 h. The reaction mixture was then quenched with a saturated aqueous solution of NaHCO<sub>3</sub> (20 mL). The aqueous layer was extracted with Et<sub>2</sub>O (2 x 50 mL) and the combined organic extracts were then washed with brine (50 mL). The organic layer was then dried over anhydrous MgSO<sub>4</sub>, filtered, and concentrated by rotary evaporation. The residue was purified by an automated flash chromatography system (0.5→10% EtOAc/hexanes) providing 3.28 g (80% yield) of diene **S4** as a yellow oil: TLC (EtOAc:hexanes, 1:9 v/v): R<sub>f</sub> = 0.87; <sup>1</sup>H NMR (500 MHz, CDCl<sub>3</sub>): δ 7.97-7.94 (m, 2H), 7.54 (tt, *J* = 7.4, 1.7 Hz, 1H), 7.48-7.44 (m, 3H), 4.90 (d, *J* = 2.0 Hz, 1H), 4.66 (d, *J* = 1.9 Hz, 1H), 2.28 (d, *J* = 1.1 Hz, 3H), 1.33-1.26 (m, 3H), 1.14 (d, *J* = 7.3 Hz, 18H); <sup>13</sup>C NMR (125 MHz; CDCl<sub>3</sub>): δ 193.1, 156.9, 148.3, 139.4, 132.7, 128.6 (2), 128.4 (2), 121.0, 96.8, 18.2 (6), 15.3, 12.9 (3); IR (thin film): 2946, 2869, 1660, 1594 cm<sup>-1</sup>; HRMS (ESI+) *m/z* calcd for C<sub>21</sub>H<sub>33</sub>O<sub>2</sub>Si [M+H]<sup>+</sup>: 345.2250, found: 345.2255.

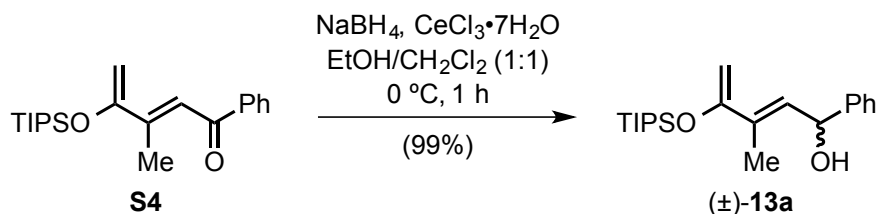

**(*E*)-3-methyl-1-phenyl-4-((triisopropylsilyloxy)methyl)penta-2,4-dien-1-ol ((±)-13a):** To a solution of diene **S4** (100 mg, 0.29 mmol, 1.0 equiv) in absolute EtOH (1.9 mL) and anhydrous CH<sub>2</sub>Cl<sub>2</sub> (1.9 mL) at 0 °C was added CeCl<sub>3</sub>·7H<sub>2</sub>O (120 mg, 0.32 mmol, 1.1 equiv) in one portion. After stirring for 15 min, NaBH<sub>4</sub> (27 mg, 0.73 mmol, 2.5 equiv) was added portionwise over a period of 1 min. The reaction was stirred for 45 min at 0 °C and then quenched with a saturated aqueous solution of NaHCO<sub>3</sub> (2.0 mL) and allowed to warm to ambient temperature. The aqueous layer was extracted with CH<sub>2</sub>Cl<sub>2</sub> (2 x 5.0 mL) and the combined organic extracts were then washed with brine (2.0 mL). The organic layer was then dried over anhydrous MgSO<sub>4</sub>, filtered, and concentrated by rotary evaporation. The residue was purified by an automated flash chromatography system (5 → 20% EtOAc/hexanes) providing 101 mg (99% yield) of silyloxydiene alcohol (±)-**13a** as a pale yellow oil: TLC (EtOAc:hexanes, 1:9 v/v): R<sub>f</sub> = 0.42; <sup>1</sup>H NMR

(500 MHz, CDCl<sub>3</sub>):  $\delta$  7.42-7.27 (m, 5H), 6.35 (d,  $J$  = 8.8 Hz, 1H), 5.58 (d,  $J$  = 8.8 Hz, 1H), 4.52 (d,  $J$  = 1.4 Hz, 1H), 4.38 (s, 1H), 1.93 (d,  $J$  = 1.1 Hz, 3H), 1.26-1.21 (m, 3H), 1.10 (dd,  $J$  = 7.4, 2.2 Hz, 18H); <sup>13</sup>C NMR (125 MHz; CDCl<sub>3</sub>):  $\delta$  157.1, 143.6, 133.0, 129.8, 128.6 (2), 127.6, 126.3 (2), 92.1, 71.2, 18.2 (6), 14.0, 12.9 (3); IR (thin film): 3384, 2945, 2867, 1595 cm<sup>-1</sup>; HRMS (ESI+)  $m/z$  calcd for C<sub>21</sub>H<sub>34</sub>O<sub>2</sub>Si [M+H]<sup>+</sup>: 347.2406, found: 347.2390.

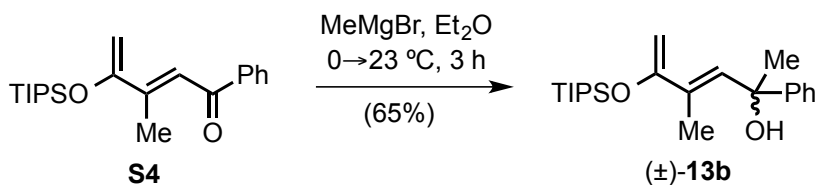

**(*E*)-4-methyl-2-phenyl-5-((triisopropylsilyloxy)oxy)hexa-3,5-dien-2-ol ((±)-13b):** To a solution of diene **S4** (3.28 g, 9.5 mmol, 1.0 equiv) in anhydrous Et<sub>2</sub>O (50 mL) at 0 °C was added MeMgBr (3.0 M solution in Et<sub>2</sub>O, 4.8 mL, 14.4 mmol, 1.5 equiv) over a period of 1 h. The reaction was stirred for 2 h at 23 °C then quenched with a saturated aqueous solution of NH<sub>4</sub>Cl (25 mL). The aqueous layer was extracted with Et<sub>2</sub>O (2 x 30 mL) and the combined organic extracts were then washed with brine (25 mL). The organic layer was then dried over anhydrous MgSO<sub>4</sub>, filtered, and concentrated by rotary evaporation. The residue was purified by an automated flash chromatography system (5→15% EtOAc/hexanes) providing 2.22 g (65% yield) of silyloxydiene alcohol (±)-**13b** as a clear colorless oil: TLC (EtOAc:hexanes, 1:9 v/v):  $R_f$  = 0.58; <sup>1</sup>H-NMR (500 MHz; CDCl<sub>3</sub>):  $\delta$  7.47-7.45 (m, 2H), 7.33-7.30 (m, 2H), 7.24-7.20 (m, 1H), 6.65 (s, 1H), 4.46 (d,  $J$  = 1.5 Hz, 1H), 4.32 (d,  $J$  = 0.5 Hz, 1H), 1.67 (s, 3H), 1.64 (d,  $J$  = 0.7 Hz, 3H), 1.28-1.22 (m, 3H), 1.12 (dd,  $J$  = 7.4, 0.8 Hz, 18H).; <sup>13</sup>C NMR (125 MHz; CDCl<sub>3</sub>):  $\delta$  157.6, 148.6, 135.0, 134.7, 128.2 (2), 126.6, 125.2 (2), 91.8, 74.2, 34.1, 18.3 (6), 14.6, 12.9 (3); IR (thin film): 3454, 2945, 2867, 1594 cm<sup>-1</sup>; HRMS (ESI+)  $m/z$  calcd for C<sub>22</sub>H<sub>37</sub>O<sub>2</sub>Si [M+H]<sup>+</sup>: 361.2563, found: 361.2549.

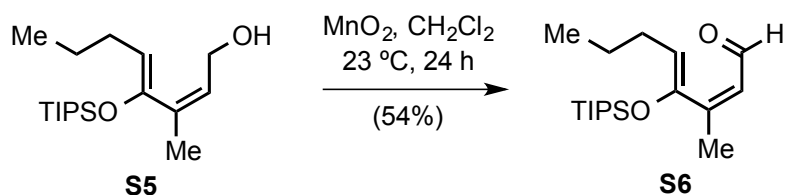

**(2Z,4Z)-3-methyl-4-((triisopropylsilyloxy)oxy)octa-2,4-dienal (S6):** To a solution of silyloxydiene alcohol **S5**<sup>2</sup> (0.96 g, 3.1 mmol, 1.0 equiv) in anhydrous CH<sub>2</sub>Cl<sub>2</sub> (20 mL) was added MnO<sub>2</sub> (5.34 g, 61.4 mmol, 20.0 equiv) and the slurry was vigorously stirred at ambient temperature (23 °C) for 24 h. The mixture was filtered through a short pad of celite and the filtrate was concentrated using rotary evaporation. Purification by an automated flash chromatography system (5→15% EtOAc/hexanes) afforded 0.38 g (54% yield) of aldehyde **S6** as a pale yellow oil: TLC (EtOAc:hexanes, 1:9 v/v): R<sub>f</sub> = 0.49; <sup>1</sup>H NMR (500 MHz, CDCl<sub>3</sub>): δ 10.11 (d, *J* = 8.1 Hz, 1H), 6.29 (dd, *J* = 8.1, 0.4 Hz, 1H), 5.37 (t, *J* = 7.3 Hz, 1H), 2.26 (d, *J* = 1.0 Hz, 3H), 2.19 (q, *J* = 7.4 Hz, 2H), 1.43 (sext, *J* = 7.4 Hz, 2H), 1.22-1.16 (m, 3H), 1.09 (d, *J* = 7.0 Hz, 18H), 0.93 (t, *J* = 7.4 Hz, 3H); <sup>13</sup>C NMR (125 MHz; CDCl<sub>3</sub>): δ 192.0, 154.3, 150.8, 124.9, 118.2, 28.9, 22.6, 18.1 (6), 14.3, 14.1, 14.0 (3); IR (thin film): 2960, 2869, 1668, 1618 cm<sup>-1</sup>; HRMS (ESI+) *m/z* calcd for C<sub>18</sub>H<sub>35</sub>O<sub>2</sub>Si [M+H]<sup>+</sup>: 311.2406, found: 311.2403.

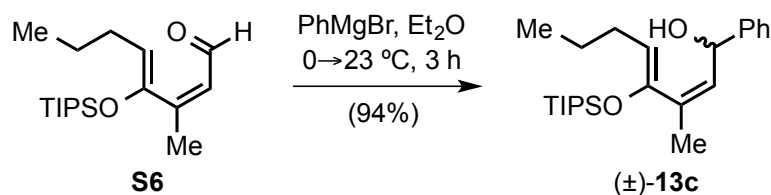

**(2Z,4Z)-3-methyl-1-phenyl-4-((triisopropylsilyloxy)oxy)octa-2,4-dien-1-ol ((±)-13c):** To a solution of aldehyde **S6** (0.38 g, 1.2 mmol, 1.0 equiv) in anhydrous Et<sub>2</sub>O (8.0 mL) at 0 °C was added PhMgBr (3.0 M solution in Et<sub>2</sub>O, 0.53 mL, 1.6 mmol, 1.3 equiv) over a period of 1 h. The reaction was stirred for 2 h at 23 °C then quenched with a saturated aqueous solution of NH<sub>4</sub>Cl (4 mL). The aqueous layer was extracted with Et<sub>2</sub>O (2 x 10 mL) and the combined organic extracts were then washed with brine (5 mL). The organic layer was then dried over anhydrous MgSO<sub>4</sub>, filtered, and concentrated by rotary

evaporation. The residue was purified by an automated flash chromatography system (5→20% EtOAc/hexanes) providing 0.44 g (94% yield) of silyloxydiene alcohol ( $\pm$ )-**13c** as a pale yellow oil: TLC (EtOAc:hexanes, 1:9 v/v):  $R_f = 0.42$ ;  $^1\text{H}$  NMR (500 MHz;  $\text{CDCl}_3$ ):  $\delta$  7.42-7.25 (m, 5H), 5.98 (dd,  $J = 8.9, 0.4$  Hz, 1H), 5.57 (d,  $J = 8.9$  Hz, 1H), 4.90 (t,  $J = 7.1$  Hz, 1H), 2.19-2.07 (m, 2H), 1.95 (t,  $J = 0.5$  Hz, 3H), 1.40 (dt,  $J = 14.9, 7.4$  Hz, 2H), 1.15-1.04 (m, 21H), 0.94 (t,  $J = 7.4$  Hz, 3H);  $^{13}\text{C}$  NMR (125 MHz;  $\text{CDCl}_3$ ):  $\delta$  151.2, 143.8, 134.8, 128.5 (2), 128.1, 127.5, 126.0 (2), 111.4, 71.3, 28.5, 23.0, 18.1 (6), 14.7, 14.2, 13.9 (3); IR (thin film): 3356, 2946, 2867  $\text{cm}^{-1}$ ; HRMS (ESI+)  $m/z$  calcd for  $\text{C}_{24}\text{H}_{39}\text{OSi}$   $[\text{M}-\text{OH}]^+$ : 371.2765, found: 371.2715.

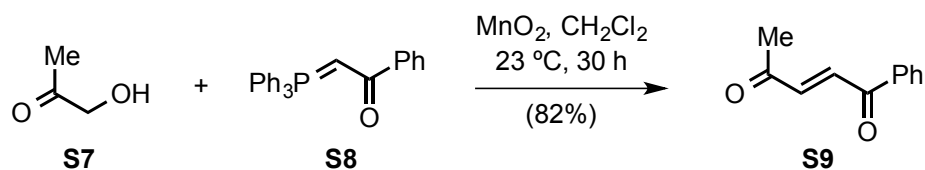

**(E)-1-phenylpent-2-ene-1,4-dione (S9):** To a solution of hydroxyacetone **S7** (2.4 mL, 34.2 mmol, 1.3 equiv) and (benzoylmethylene)triphenylphosphorane **S8** (10.0 g, 26.3 mmol, 1.0 equiv) in anhydrous  $\text{CH}_2\text{Cl}_2$  (90 mL) was added  $\text{MnO}_2$  (23.0 g, 262.9 mmol, 10.0 equiv) and the slurry was vigorously stirred at ambient temperature ( $23\text{ }^\circ\text{C}$ ) for 30 h. The mixture was filtered through a short pad of celite and the filtrate was concentrated using rotary evaporation. The residue was then diluted with cold  $\text{Et}_2\text{O}$  (100 mL), filtered through a plug of celite and washed with additional  $\text{Et}_2\text{O}$  (50 mL). The filtrate was concentrated by rotary evaporation and purified by an automated flash chromatography system (5→25% EtOAc/hexanes) providing 3.76 g (82% yield) of diketone **S9** as a yellow solid: m.p. =  $42\text{-}47\text{ }^\circ\text{C}$ ; TLC (EtOAc:hexanes, 1:9 v/v):  $R_f = 0.28$ ;  $^1\text{H}$  NMR (500 MHz,  $\text{CDCl}_3$ ):  $\delta$  7.98-7.96 (m, 2H), 7.68 (d,  $J = 15.8$  Hz, 1H), 7.63-7.59 (m, 1H), 7.51-7.48 (m, 2H), 7.06 (d,  $J = 15.7$  Hz, 1H), 2.42 (s, 3H);  $^{13}\text{C}$  NMR (125 MHz;  $\text{CDCl}_3$ ):  $\delta$  198.0, 190.4, 138.5, 136.7, 134.02, 133.97, 128.98 (2), 128.90 (2), 29.1; IR (thin film): 1668, 1614  $\text{cm}^{-1}$ ; HRMS (ESI+)  $m/z$  calcd for  $\text{C}_{11}\text{H}_{10}\text{LiO}_2$   $[\text{M}+\text{Li}]^+$ : 181.0841, found: 181.0833.



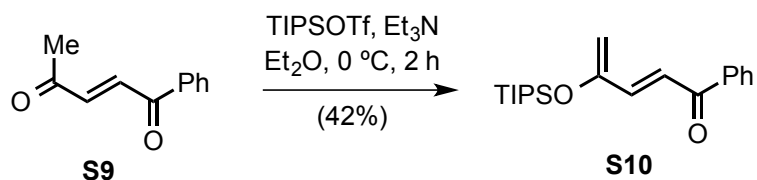

**(*E*)-1-phenyl-4-((triisopropylsilyloxy)penta-2,4-dien-1-one (S10):** To a solution of diketone **S9** (4.77 g, 27.4 mmol, 1.0 equiv) in anhydrous Et<sub>2</sub>O (91 mL) at 0 °C was added Et<sub>3</sub>N (5.7 mL, 40.9 mmol, 1.5 equiv) dropwise. After stirring for 10 min, TIPSOTf (8.8 mL, 32.7 mmol, 1.2 equiv) was added over a period of 30 min. The reaction was stirred for 2 h at 0 °C then quenched with a saturated aqueous solution of NaHCO<sub>3</sub> (45 mL). The aqueous layer was extracted with Et<sub>2</sub>O (2 x 50 mL) and the combined organic extracts were then washed with brine (50 mL). The organic layer was then dried over anhydrous MgSO<sub>4</sub>, filtered, and concentrated by rotary evaporation. The residue was purified by an automated flash chromatography system (0.5→10% EtOAc/hexanes) providing 3.76 g (42% yield) of diene **S10** as an orange oil: TLC (EtOAc:hexanes, 1:9 v/v): R<sub>f</sub> = 0.79; <sup>1</sup>H NMR (500 MHz, CDCl<sub>3</sub>): δ 7.96-7.95 (m, 2H), 7.59-7.55 (m, 1H), 7.50-7.47 (m, 2H), 7.35 (dd, *J* = 14.9, 0.3 Hz, 1H), 7.21 (d, *J* = 14.9 Hz, 1H), 4.75 (s, 2H), 1.33-1.27 (m, 3H), 1.15 (d, *J* = 7.3 Hz, 18H); <sup>13</sup>C NMR (125 MHz; CDCl<sub>3</sub>): δ 190.8, 154.5, 142.5, 138.3, 132.9, 128.8 (2), 128.6 (2), 122.6, 103.4, 18.2 (6), 12.9 (3); IR (thin film): 2946, 2868, 1667, 1607, 1590 cm<sup>-1</sup>; HRMS (ESI+) *m/z* calcd for C<sub>20</sub>H<sub>31</sub>O<sub>2</sub>Si [M+H]<sup>+</sup>: 331.2093, found: 331.2178.

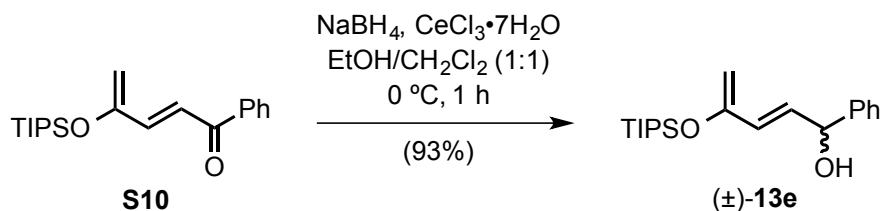

**(*E*)-1-phenyl-4-((triisopropylsilyloxy)penta-2,4-dien-1-ol ((±)-13e):** To a solution of diene **S10** (3.67 g, 11.1 mmol, 1.0 equiv) in absolute EtOH (74 mL) and anhydrous CH<sub>2</sub>Cl<sub>2</sub> (74 mL) at 0 °C was added CeCl<sub>3</sub>·7H<sub>2</sub>O (4.34 g, 11.7 mmol, 1.1 equiv) in one portion. After stirring for 20 min, NaBH<sub>4</sub> (1.1 g, 27.8 mmol, 2.5 equiv) was added

portion wise over a period of 30 min. The reaction was stirred for 30 min at 0 °C then quenched with a saturated aqueous solution of NaHCO<sub>3</sub> (30 mL) and warmed to ambient temperature. The aqueous layer was extracted with CH<sub>2</sub>Cl<sub>2</sub> (2 x 100 mL) and washed with brine (30 mL). The organic layer was then dried over anhydrous MgSO<sub>4</sub>, filtered, and concentrated by rotary evaporation. The residue was purified by an automated flash chromatography system (5→20% EtOAc/hexanes) providing 3.43 g (93% yield) of silyloxydiene alcohol (±)-**13e** as a yellow oil: TLC (EtOAc:hexanes, 1:9 v/v): R<sub>f</sub> = 0.37; <sup>1</sup>H NMR (500 MHz, CDCl<sub>3</sub>): δ 7.41-7.28 (m, 5H), 6.28 (ddd, *J* = 15.2, 6.1, 0.4 Hz, 1H), 6.17 (dd, *J* = 15.2, 1.1 Hz, 1H), 5.31 (d, *J* = 6.1 Hz, 1H), 4.37 (s, 1H), 4.33 (s, 1H), 1.27-1.22 (m, 3H), 1.11 (d, *J* = 7.4 Hz, 18H); <sup>13</sup>C NMR (125 MHz; CDCl<sub>3</sub>): δ 154.8, 142.9, 132.1, 128.7, 128.6 (2), 127.8, 126.6 (2), 95.7, 74.4, 18.2 (6), 12.9 (3); IR (thin film): 3356, 2945, 2868, 1592 cm<sup>-1</sup>; HRMS (ESI+) *m/z* calcd for C<sub>20</sub>H<sub>33</sub>O<sub>2</sub>Si [M+H]<sup>+</sup>: 333.2250, found: 333.2245.

**Representative procedure for the stereodivergent DAL process as described for bicyclic  $\gamma$ -lactones (–)-14a and (+)-14a’:**

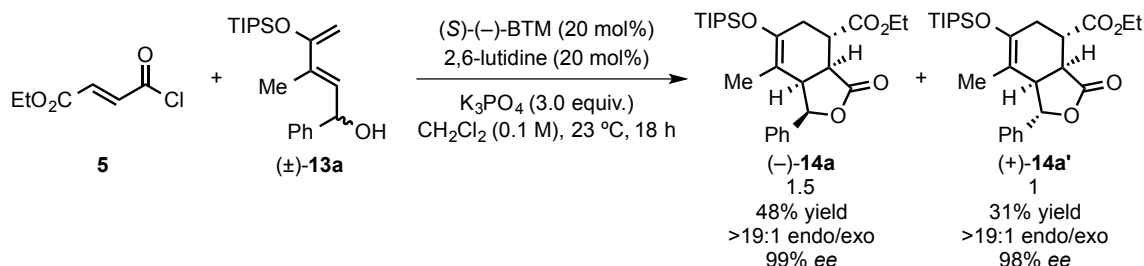

**Ethyl (1*R*,3*aS*,4*S*,7*aR*)-7-methyl-3-oxo-1-phenyl-6-((triisopropylsilyl)oxy)-1,3,3*a*,4,5,7*a*-hexahydroisobenzofuran-4-carboxylate ((–)-14a) and ethyl (1*S*,3*aS*,4*S*,7*aR*)-7-methyl-3-oxo-1-phenyl-6-((triisopropylsilyl)oxy)-1,3,3*a*,4,5,7*a*-hexahydroisobenzofuran-4-carboxylate ((+)-14a’):** To an oven-dried, 5-mL round-bottomed flask equipped with a magnetic stir bar was added silyloxydiene alcohol ((±)-**13a**) (34 mg, 0.10 mmol, 1.0 equiv), (S)-(-)-BTM (5.0 mg, 0.020 mmol, 20 mol%), 2,6-lutidine (2.3  $\mu$ L, 0.020 mmol, 20 mol%),  $K_3PO_4$  (64.0 mg, 0.30 mmol, 3.0 equiv) and anhydrous  $CH_2Cl_2$  (0.7 mL, to make final concentration of silyloxydiene alcohol 0.1 M) at ambient temperature (23 °C). With vigorous stirring, ethyl fumaroyl chloride **5** (20  $\mu$ L, 0.15 mmol, 1.5 equiv) in  $CH_2Cl_2$  (0.3 mL) was added over a period of 5 h by syringe pump addition. After stirring for an additional 13 h, the reaction mixture was filtered through a pad of celite and concentrated by rotary evaporation. Purification by an automated flash chromatography (5 $\rightarrow$ 20% EtOAc/hexanes) afforded a single *endo* diastereomer (as judged by  $^1H$  NMR) of bicyclic  $\gamma$ -lactone (–)-**14a** (20 mg, 48% yield, 99% *ee*) and a single *endo* diastereomer (as judged by  $^1H$  NMR) of bicyclic  $\gamma$ -lactone (+)-**14a'** (13 mg, 31% yield, 98% *ee*).

(–)-**14a**: clear colorless oil; TLC (EtOAc:hexanes, 1:9 v/v):  $R_f$  = 0.53;  $[\alpha]_D^{18.5} = -22.86$  ( $c$  = 1.40,  $CHCl_3$ ). Enantiomeric excess was determined by chiral HPLC analysis in comparison with authentic racemic material using a Chiralcel OD-H column: hexanes:*i*PrOH = 95:05, flow rate 0.5 mL/min,  $\lambda$  = 210 nm:  $t_{major}$  = 11.4 min,  $t_{minor}$  =

13.4 min; 99% *ee*. Absolute stereochemistry was assigned by analogy to tricyclic  $\gamma$ -lactone (–)-**6a**<sup>2</sup>. <sup>1</sup>H NMR (500 MHz; CDCl<sub>3</sub>):  $\delta$  7.42-7.39 (m, 2H), 7.35-7.30 (m, 3H), 5.39 (s, 1H), 4.17-4.04 (m, 2H), 3.29 (ddd, *J* = 7.7, 3.3, 0.9 Hz, 1H), 3.26 (dd, *J* = 6.1, 3.2 Hz, 1H), 3.19 (d, *J* = 7.5 Hz, 1H), 2.57-2.53 (m, 1H), 2.49 (ddt, *J* = 17.1, 6.0, 2.3 Hz, 1H), 1.80 (s, 3H), 1.21 (t, *J* = 7.1 Hz, 3H), 1.17-1.12 (m, 3H), 1.09 (dd, *J* = 6.8, 2.1 Hz, 18H); <sup>13</sup>C NMR (125 MHz; CDCl<sub>3</sub>):  $\delta$  177.7, 172.8, 144.4, 139.7, 129.0 (2), 128.3, 124.9 (2), 108.0, 83.6, 61.4, 47.6, 38.5, 38.3, 28.8, 18.1 (6), 14.5, 14.2, 13.3 (3); IR (thin film): 2944, 2867, 1780, 1732, 1676 cm<sup>-1</sup>; HRMS (ESI+) *m/z* calcd for C<sub>27</sub>H<sub>41</sub>O<sub>5</sub>Si [M+H]<sup>+</sup>: 473.2723, found: 473.2734.

(+)-**14a**<sup>9</sup>: clear colorless oil; TLC (EtOAc:hexanes, 1:9 *v/v*): *R<sub>f</sub>* = 0.50; [ $\alpha$ ]<sub>D</sub><sup>18.8</sup> = +30.38 (*c* = 0.80, CHCl<sub>3</sub>). Enantiomeric excess was determined by chiral HPLC analysis in comparison with authentic racemic material using a Chiralcel AS-H column: hexanes:*i*PrOH = 95:05, flow rate 0.5 mL/min,  $\lambda$  = 210 nm: *t*<sub>major</sub> = 16.9 min, *t*<sub>minor</sub> = 19.4 min; 98% *e.e.* Absolute stereochemistry was assigned by analogy to a ring-opened derivative of tricyclic  $\gamma$ -lactone (–)-**6a**<sup>2</sup>. <sup>1</sup>H NMR (500 MHz; CDCl<sub>3</sub>):  $\delta$  7.41-7.38 (m, 5H), 5.07 (d, *J* = 10.2 Hz, 1H), 4.35-4.22 (m, 2H), 3.08-3.04 (m, 1H), 2.96 (d, *J* = 11.5 Hz, 1H), 2.93-2.88 (m, 1H), 2.56-2.52 (m, 2H), 1.35-1.32 (m, 6H), 1.13-1.08 (m, 3H), 1.06 (dd, *J* = 6.7, 2.4 Hz, 18H); <sup>13</sup>C NMR (125 MHz; CDCl<sub>3</sub>):  $\delta$  173.3, 172.9, 144.8, 137.0, 129.6, 128.8 (2), 128.1 (2), 109.8, 85.4, 61.4, 50.0, 46.5, 39.9, 34.7, 18.1 (6), 14.3, 13.33, 13.27 (3); IR (thin film): 2946, 2869, 1790, 1738, 1663 cm<sup>-1</sup>; HRMS (ESI+) *m/z* calcd for C<sub>27</sub>H<sub>41</sub>O<sub>5</sub>Si [M+H]<sup>+</sup>: 473.2723, found: 473.2735.

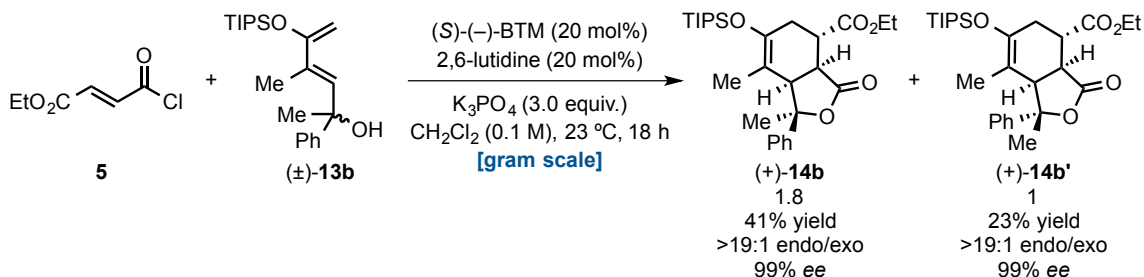

**Ethyl (1*R*,3*aS*,4*S*,7*aR*)-1,7-dimethyl-3-oxo-1-phenyl-6-((triisopropylsilyloxy)-1,3,3*a*,4,5,7*a*-hexahydroisobenzofuran-4-carboxylate ((+)-14b) and ethyl (1*S*,3*aS*,4*S*,7*aR*)-1,7-dimethyl-3-oxo-1-phenyl-6-((triisopropylsilyloxy)-1,3,3*a*,4,5,7*a*-hexahydroisobenzofuran-4-carboxylate ((+)-14b')**: Prepared according to the representative procedure using silyloxydiene alcohol ( $\pm$ )-13b (2.03 g, 5.63 mmol, 1.0 equiv), (S)-(-)-BTM (284 mg, 1.13 mmol, 20 mol%), 2,6-lutidine (0.13 mL, 1.13 mmol, 20 mol%), K<sub>3</sub>PO<sub>4</sub> (3.59 g, 16.89 mmol, 3.0 equiv) in anhydrous CH<sub>2</sub>Cl<sub>2</sub> (56 mL, to make initial concentration of silyloxydiene alcohol 0.1 M) and ethyl fumaroyl chloride **5** (1.13 mL, 8.44 mmol, dissolved in 24 mL CH<sub>2</sub>Cl<sub>2</sub>, 1.5 equiv) at ambient temperature (23 °C). Upon completion (as judged by TLC), the reaction mixture was purified by an automated flash chromatography (5→20% EtOAc/hexanes) to afford a single *endo* diastereomer (as judged by <sup>1</sup>H NMR) of bicyclic  $\gamma$ -lactone (+)-14b (1.09 g, 41% yield, 99% e.e.) and a single *endo* diastereomer (as judged by <sup>1</sup>H NMR) of bicyclic  $\gamma$ -lactone (+)-14b' (0.62 g, 23% yield, 99% e.e.).

(+)-14b: clear colorless oil; TLC (EtOAc:hexanes, 1:9 v/v): R<sub>f</sub> = 0.54; [ $\alpha$ ]<sub>D</sub><sup>20.1</sup> = +30.30 (*c* = 3.30, CHCl<sub>3</sub>). Enantiomeric excess was determined by chiral HPLC analysis in comparison with authentic racemic material using a Chiralcel OD-H column: hexanes:<sup>i</sup>PrOH = 95:05, flow rate 0.5 mL/min,  $\lambda$  = 210 nm: t<sub>major</sub> = 12.0 min, t<sub>minor</sub> = 16.1 min; 99% ee. Absolute stereochemistry was assigned by analogy to tricyclic  $\gamma$ -lactone (-)-6a<sup>2</sup>. <sup>1</sup>H NMR (500 MHz; CDCl<sub>3</sub>):  $\delta$  7.33-7.28 (m, 5H), 4.21-4.11 (m, 2H), 3.59 (ddd, *J* = 8.3, 4.4, 1.3 Hz, 1H), 3.21 (d, *J* = 8.3 Hz, 1H), 3.18 (dd, *J* = 9.7, 4.2 Hz, 1H), 2.53-2.49 (m, 1H), 2.38 (ddt, *J* = 16.5, 5.6, 2.1 Hz, 1H), 1.93 (s, 3H), 1.25 (t, *J* = 7.1 Hz, 3H), 1.08-1.04 (m, 3H), 1.02 (dd, *J* = 5.7, 3.7 Hz, 18H), 0.87 (s, 3H); <sup>13</sup>C NMR

(125 MHz; CDCl<sub>3</sub>):  $\delta$  177.1, 172.8, 145.6, 141.2, 128.1 (2), 127.9, 126.2 (2), 107.4, 89.3, 61.3, 52.5, 42.4, 39.5, 29.5, 28.1, 18.1 (6), 16.4, 14.2, 13.2 (3); IR (thin film): 2945, 2867, 1770, 1732, 1666 cm<sup>-1</sup>; HRMS (ESI+)  $m/z$  calcd for C<sub>28</sub>H<sub>43</sub>O<sub>5</sub>Si [M+H]<sup>+</sup>: 487.2880, found: 487.2862.

(+)-**14b'**: clear colorless oil; TLC (EtOAc:hexanes, 1:9 v/v): R<sub>f</sub> = 0.65;  $[\alpha]_D^{19.7} = +51.85$  ( $c = 2.70$ , CHCl<sub>3</sub>). Enantiomeric excess was determined by chiral HPLC analysis in comparison with authentic racemic material using a Chiralcel AD-H column: hexanes:PrOH = 95:05, flow rate 0.8 mL/min,  $\lambda = 210$  nm:  $t_{\text{major}} = 6.5$  min,  $t_{\text{minor}} = 7.9$  min; 99% *ee*. Absolute stereochemistry was assigned by analogy to a ring-opened derivative of tricyclic  $\gamma$ -lactone (–)-**6a'**<sup>2</sup>. <sup>1</sup>H NMR (500 MHz; CDCl<sub>3</sub>):  $\delta$  7.43-7.41 (m, 2H), 7.34-7.29 (m, 3H), 4.30-4.15 (m, 2H), 3.02 (dt,  $J = 13.5, 1.4$  Hz, 1H), 2.85 (t,  $J = 12.5$  Hz, 1H), 2.77 (td,  $J = 10.9, 6.5$  Hz, 1H), 2.49-2.36 (m, 2H), 1.92 (s, 3H), 1.88 (s, 3H), 1.29 (t,  $J = 7.1$  Hz, 3H), 1.11-1.07 (m, 3H), 1.05 (d,  $J = 6.7$  Hz, 18H); <sup>13</sup>C NMR (125 MHz; CDCl<sub>3</sub>):  $\delta$  173.6, 173.1, 145.8, 139.9, 128.6 (2), 128.2, 126.2 (2), 109.4, 88.6, 61.3, 54.7, 44.3, 39.9, 35.0, 30.1, 18.1 (6), 14.26, 14.21, 13.2(3); IR (thin film): 2945, 2868, 1786, 1737, 1652 cm<sup>-1</sup>; HRMS (ESI+)  $m/z$  calcd for C<sub>28</sub>H<sub>43</sub>O<sub>5</sub>Si [M+H]<sup>+</sup>: 487.2880, found: 487.2891.

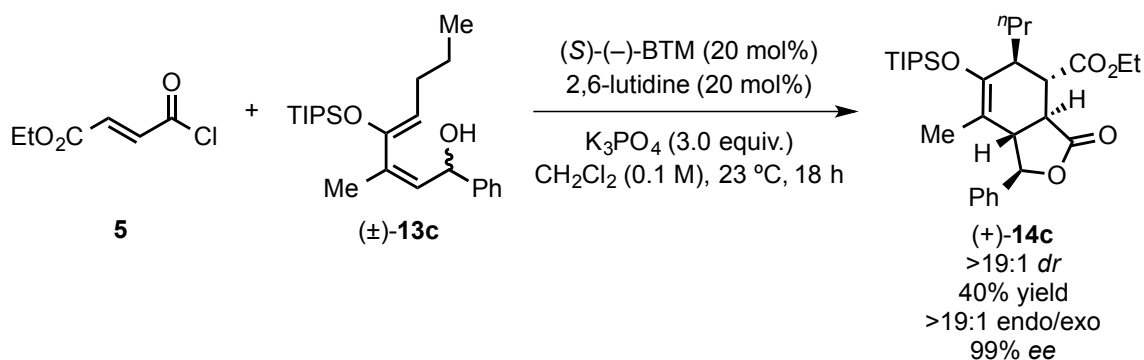

**Ethyl (1R,3aS,4S,5S,7aS)-7-methyl-3-oxo-1-phenyl-5-propyl-6-((triisopropylsilyl)-oxy)-1,3,3a,4,5,7a-hexahydroisobenzofuran-4-carboxylate ((+)-14c):** Prepared according to the representative procedure using silyloxydiene alcohol ((±)-13c (39 mg, 0.10 mmol, 1.0 equiv), (S)-(-)-BTM (5.0 mg, 0.020 mmol, 20 mol%), 2,6-lutidine (2.3  $\mu\text{L}$ , 0.020 mmol, 20 mol%),  $\text{K}_3\text{PO}_4$  (64 mg, 0.30 mmol, 3.0 equiv) in anhydrous  $\text{CH}_2\text{Cl}_2$  (0.7 mL, to make final concentration of silyloxydiene alcohol 0.1 M) and ethyl fumaroyl chloride **5** (20  $\mu\text{L}$ , 0.15 mmol, dissolved in 0.3 mL  $\text{CH}_2\text{Cl}_2$ , 1.5 equiv) at ambient temperature (23 °C). Upon completion (as judged by TLC), the reaction mixture was purified by an automated flash chromatography (5→20% EtOAc/hexanes) to afford a single *endo* diastereomer (as judged by  $^1\text{H}$  NMR) of bicyclic  $\gamma$ -lactone (+)-14c (20 mg, 40% yield, 99% ee) as a clear colorless oil: TLC (EtOAc:hexanes, 1:9 v/v):  $R_f = 0.42$ ;  $[\alpha]_D^{20.1} = +41.03$  ( $c = 0.39$ ,  $\text{CHCl}_3$ ). Enantiomeric excess was determined by chiral HPLC analysis in comparison with authentic racemic material using a Chiralpak IA column: hexanes:*i*PrOH = 95:05, flow rate 0.5 mL/min,  $\lambda = 210$  nm:  $t_{\text{major}} = 28.9$  min,  $t_{\text{minor}} = 43.7$  min; 99% ee. Absolute stereochemistry was assigned by analogy to tricyclic  $\gamma$ -lactone (-)-6a<sup>2</sup>.  $^1\text{H}$  NMR (500 MHz;  $\text{CDCl}_3$ ):  $\delta$  7.41-7.38 (m, 5H), 5.06 (d,  $J = 10.1$  Hz, 1H), 4.32-4.19 (m, 2H), 3.03 (dd,  $J = 13.3, 11.7$  Hz, 1H), 2.95 (dd,  $J = 11.6, 6.2$  Hz, 1H), 2.91 (dd,  $J = 12.2, 10.9$  Hz, 1H), 2.53 (t,  $J = 6.3$  Hz, 1H), 1.73-1.60 (m, 2H), 1.33 (t,  $J = 7.2$  Hz, 3H), 1.27 (s, 3H), 1.24-1.16 (m, 2H), 1.11-1.08 (m, 3H), 1.06 (d,  $J = 6.4$  Hz, 18H), 0.87 (t,  $J = 7.2$  Hz, 3H);  $^{13}\text{C}$  NMR (125 MHz;  $\text{CDCl}_3$ ):  $\delta$  173.5, 170.9, 148.5, 137.2, 129.5, 128.8 (2), 128.1 (2), 109.5, 85.1, 61.1, 50.7, 43.8, 43.4, 42.8, 33.0, 22.1,

18.2 (6), 14.8, 14.25, 14.24, 13.8 (3); IR (thin film): 2948, 2870, 1793, 1737, 1653 cm<sup>-1</sup>; HRMS (ESI+) *m/z* calcd for C<sub>30</sub>H<sub>47</sub>O<sub>5</sub>Si [M+H]<sup>+</sup>: 515.3193, found: 515.3211.

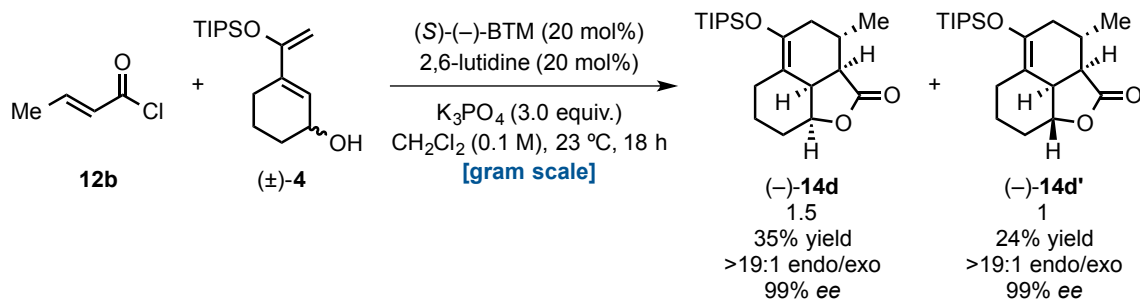

**(2a*R*,2a'<sup>1</sup>*R*,3*S*,8a*S*)-3-methyl-5-((triisopropylsilyl)oxy)-2a,2a<sup>1</sup>,3,4,6,7,8,8a-octahydro-2*H*-naphtho[1,8-*bc*]furan-2-one ((-)-14d)** and **(2a*R*,2a'<sup>1</sup>*R*,3*S*,8a*R*)-3-methyl-5-((triisopropylsilyl)oxy)-2a,2a<sup>1</sup>,3,4,6,7,8,8a-octahydro-2*H*-naphtho[1,8-*bc*]furan-2-one ((-)-14d')**: Prepared by a modified representative procedure. To an oven-dried, 250-mL round-bottomed flask equipped with a magnetic stir bar was added silyloxydiene alcohol (**(±)-4**)<sup>2</sup> (2.73 g, 9.21 mmol, 1.0 equiv), (S)-(-)-BTM (465 mg, 1.84 mmol, 20 mol%), 2,6-lutidine (0.21 mL, 1.84 mmol, 20 mol%), K<sub>3</sub>PO<sub>4</sub> (5.87 g, 27.63 mmol, 3.0 equiv) and anhydrous CH<sub>2</sub>Cl<sub>2</sub> (80 mL, to make final concentration of silyloxydiene alcohol 0.1 M) at ambient temperature (23 °C). With vigorous stirring, crotonoyl chloride **12b** (1.32 mL, 13.82 mmol, 1.5 equiv) in CH<sub>2</sub>Cl<sub>2</sub> (12 mL) was added over a period of ~5 min. After stirring for 18 h, the reaction mixture was filtered through a pad of celite and concentrated by rotary evaporation. Purification by an automated flash chromatography (5→20% EtOAc/hexanes) afforded a single *endo* diastereomer (as judged by <sup>1</sup>H NMR) of tricyclic  $\gamma$ -lactone **(-)-14d** (1.17 g, 35% yield, 99% *ee*) and a single *endo* diastereomer (as judged by <sup>1</sup>H NMR) of tricyclic  $\gamma$ -lactone **(-)-14d'** (0.80 g, 24% yield, 99% *ee*).

**(-)-14d**: clear colorless oil; TLC (EtOAc:hexanes, 1:9 *v/v*): R<sub>f</sub> = 0.34; [ $\alpha$ ]<sub>D</sub><sup>19.2</sup> = -62.86 (*c* = 3.50, CHCl<sub>3</sub>). Enantiomeric excess was determined by chiral HPLC analysis in comparison with authentic racemic material using a Chiralcel OD-H column:



hexanes:<sup>i</sup>PrOH = 95:05, flow rate 0.5 mL/min,  $\lambda$  = 210 nm:  $t_{\text{minor}}$  = 11.1 min,  $t_{\text{major}}$  = 12.1 min; 99% e.e. Absolute stereochemistry was assigned by analogy to tricyclic  $\gamma$ -lactone (–)-**6a**<sup>2</sup>. <sup>1</sup>H NMR (500 MHz; CDCl<sub>3</sub>):  $\delta$  4.49 (q,  $J$  = 3.3 Hz, 1H), 2.96-2.93 (m, 1H), 2.88 (d,  $J$  = 2.2 Hz, 1H), 2.57-2.51 (m, 2H), 2.50-2.44 (m, 1H), 2.19-2.15 (m, 1H), 1.74 (d,  $J$  = 17.2 Hz, 1H), 1.71-1.65 (m, 1H), 1.61-1.56 (m, 1H), 1.49 (tt,  $J$  = 12.6, 3.3 Hz, 1H), 1.42 (td,  $J$  = 12.4, 2.2 Hz, 1H), 1.13-1.07 (m, 6H), 1.05 (d,  $J$  = 5.9 Hz, 18H); <sup>13</sup>C NMR (125 MHz; CDCl<sub>3</sub>):  $\delta$  178.5, 143.6, 108.6, 79.4, 47.6, 37.6, 33.2, 27.8, 25.0, 24.4, 21.0, 20.3, 18.1 (6), 13.4 (3); IR (thin film): 2943, 2867, 1778, 1675 cm<sup>-1</sup>; HRMS (ESI+)  $m/z$  calcd for C<sub>21</sub>H<sub>37</sub>O<sub>3</sub>Si [M+H]<sup>+</sup>: 365.2512, found: 365.2510.

(–)-**14d**<sup>7</sup>: clear colorless oil; TLC (EtOAc:hexanes, 1:9 v/v):  $R_f$  = 0.49;  $[\alpha]_D^{19.6}$  = –12.50 ( $c$  = 1.60, CHCl<sub>3</sub>). Enantiomeric excess was determined by chiral HPLC analysis in comparison with authentic racemic material using a Chiralpak IA column: hexanes:<sup>i</sup>PrOH = 95:05, flow rate 0.5 mL/min,  $\lambda$  = 230 nm:  $t_{\text{minor}}$  = 14.1 min,  $t_{\text{major}}$  = 17.2 min; 99% e.e. Absolute stereochemistry was assigned by analogy to a ring-opened derivative of tricyclic  $\gamma$ -lactone (–)-**6a**<sup>2</sup>. <sup>1</sup>H NMR (500 MHz; CDCl<sub>3</sub>):  $\delta$  3.90 (td,  $J$  = 11.2, 3.4 Hz, 1H), 2.76 (ddd,  $J$  = 13.9, 5.1, 1.6 Hz, 1H), 2.40 (dd,  $J$  = 10.7, 7.8 Hz, 1H), 2.27-2.19 (m, 2H), 2.17-2.10 (m, 1H), 2.09-2.02 (m, 2H), 1.97-1.91 (m, 1H), 1.73-1.61 (m, 2H), 1.49-1.41 (m, 1H), 1.17 (d,  $J$  = 6.1 Hz, 3H), 1.14-1.10 (m, 3H), 1.08 (d,  $J$  = 5.6 Hz, 18H); <sup>13</sup>C NMR (125 MHz; CDCl<sub>3</sub>):  $\delta$  177.8, 141.3, 110.9, 84.5, 48.8, 45.7, 38.9, 30.7, 28.1, 24.9, 24.8, 18.9, 18.1 (6), 13.2 (3); IR (thin film): 2944, 2867, 1766, 1737, 1697 cm<sup>-1</sup>; HRMS (ESI+)  $m/z$  calcd for C<sub>21</sub>H<sub>37</sub>O<sub>3</sub>Si [M+H]<sup>+</sup>: 365.2512, found: 365.2497.

## Representative examples of unsuccessful DAL process (Table S1):

**Table S1.** Representative examples of unsuccessful DAL process.<sup>†</sup>

**a.** Unsuccessful  $\alpha,\beta$ -unsaturated acid chlorides (dienophiles):

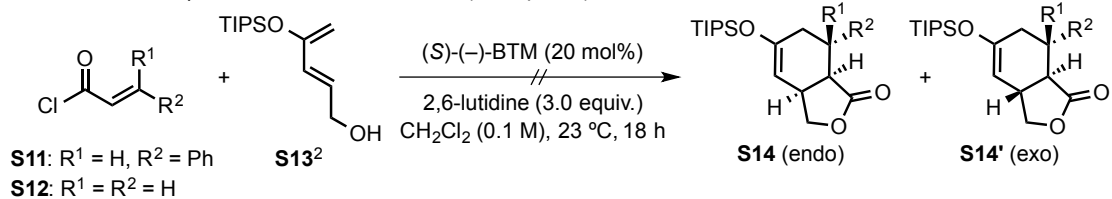

**a.** Unsuccessful dienes:

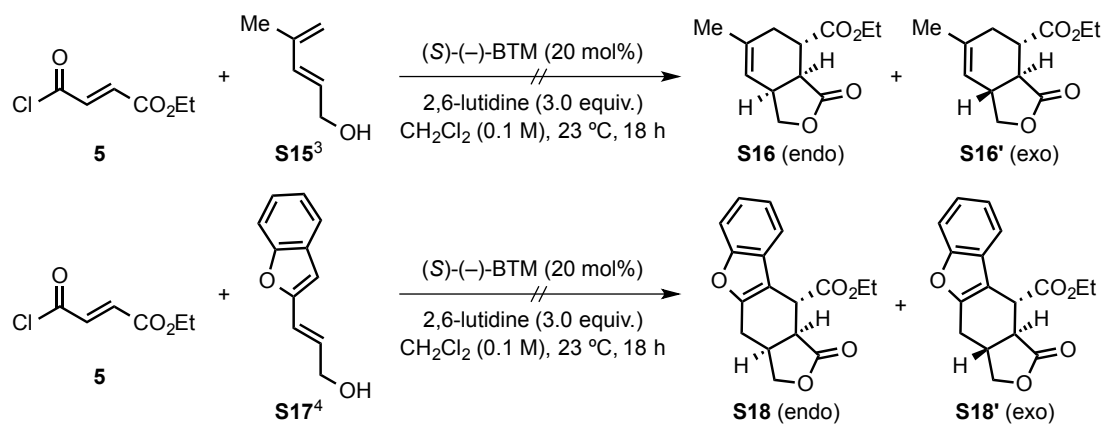

<sup>†</sup>Reactions were performed with dienes **S13**, **S15**, **S17** (1.0 equiv), acid chlorides **S11**, **S12**, **5** (1.2 equiv), (S)-(-)-BTM (20 mol%) and 2,6-lutidine (3.0 equiv) in CH<sub>2</sub>Cl<sub>2</sub> (0.1 M) at ambient temperature (23 °C) for 18 h. The crude reaction mixtures were then analyzed by LC/MS and <sup>1</sup>H NMR (500 MHz).

### Synthetic applications of $\gamma$ -lactone (-)-14d:

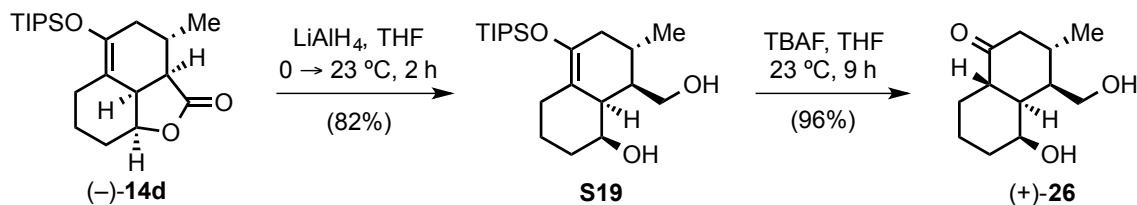

#### (3*S*,4*R*,4*aR*,5*S*,8*aS*)-5-hydroxy-4-(hydroxymethyl)-3-methyloctahydronaphthalen-

**1(2*H*)-one ((+)-26):** Into an oven-dried, 10-mL round-bottomed flask containing a solution of tricyclic  $\gamma$ -lactone (-)-14d (50 mg, 0.14 mmol, 1.0 equiv) in anhydrous THF (2.7 mL, to make initial concentration of tricyclic  $\gamma$ -lactone 0.05 M) was added LiAlH<sub>4</sub> (2.0 M solution in THF, 0.21 mL, 0.42 mmol, 3.0 equiv) dropwise at 0 °C. After stirring for 20 min, the ice bath was removed and the mixture was allowed to warm up to ambient temperature (23 °C) on its own accord over 40 min. Upon completion (as judged by TLC), the reaction mixture was cooled to 0 °C and carefully quenched in sequence with 17  $\mu$ L H<sub>2</sub>O, 17  $\mu$ L 15% aqueous NaOH, and 42  $\mu$ L H<sub>2</sub>O. The ice bath was removed and the mixture was allowed to warm up to ambient temperature (23 °C) on its own accord. Subsequently, anhydrous MgSO<sub>4</sub> was added and the reaction mixture was vigorously stirred for 30 min, filtered through a pad of Celite and concentrated by rotary evaporation to afford crude diol **S19** (41 mg, 82% yield) as a clear colorless oil. The crude material was of sufficient purity (>95% as judged by <sup>1</sup>H NMR) to be carried on directly to the next step.

To a solution of crude diol **S19** (52 mg, 0.14 mmol, 1.0 equiv) in anhydrous THF (2.8 mL, to make final concentration of crude diol 0.05 M) at 0 °C was added TBAF (1.0 M solution in THF, 0.70 mL, 0.69 mmol, 5.0 equiv) dropwise. The reaction was stirred for 10 min at 0 °C then allowed to warm up to ambient temperature (23 °C) and stirred for 9 h. The reaction mixture was quenched with a saturated aqueous solution of NH<sub>4</sub>Cl (2.0 mL). The aqueous layer was extracted with Et<sub>2</sub>O (2 x 5.0 mL) and washed with brine (2.0 mL). The organic layer was then dried over anhydrous MgSO<sub>4</sub>, filtered, and concentrated by rotary evaporation. The residue was purified by an automated flash

chromatography system (20→80% EtOAc/hexanes) providing 28 mg (96% yield) of ketone (+)-**26** as a clear colorless oil: TLC (EtOAc:hexanes, 3:1 v/v):  $R_f = 0.36$ ;  $[\alpha]_D^{19.7} = +17.50$  ( $c = 0.16$ ,  $\text{CHCl}_3$ ).  $^1\text{H}$  NMR (500 MHz;  $\text{CDCl}_3$ ):  $\delta$  4.17 (dd,  $J = 11.2, 8.8$  Hz, 1H), 4.13 (s, 1H), 3.71 (dd,  $J = 11.3, 2.1$  Hz, 1H), 2.71 (td,  $J = 12.0, 3.5$  Hz, 1H), 2.41 (dd,  $J = 14.2, 5.7$  Hz, 1H), 2.26-2.21 (m, 1H), 2.10-2.08 (m, 1H), 2.06-2.05 (m, 1H), 1.90 (dd,  $J = 12.8, 4.0$  Hz, 1H), 1.84-1.79 (m, 1H), 1.73-1.66 (m, 1H), 1.61-1.55 (m, 1H), 1.47 (tdd,  $J = 13.6, 4.1, 2.1$  Hz, 1H), 1.29-1.20 (m, 2H), 0.97 (d,  $J = 7.1$  Hz, 3H);  $^{13}\text{C}$  NMR (125 MHz;  $\text{CDCl}_3$ ):  $\delta$  213.4, 69.3, 64.9, 46.6, 44.7, 44.4, 43.9, 35.6, 33.8, 25.9, 20.5, 18.9; IR (thin film): 3332, 2934, 1703  $\text{cm}^{-1}$ ; HRMS (ESI+)  $m/z$  calcd for  $\text{C}_{12}\text{H}_{20}\text{LiO}_3$   $[\text{M}+\text{Li}]^+$ : 219.1572, found: 219.1582.

## Synthesis of the isothiourea catalysts (*R*)-(+)-NBTM and (*R*)-(+)-PBTM:

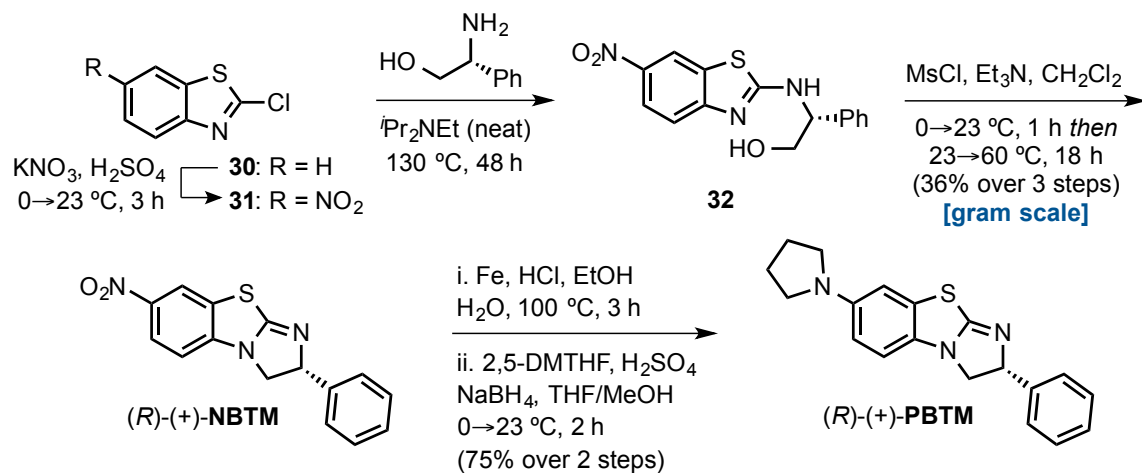

**(*R*)-7-nitro-2-phenyl-2,3-dihydrobenzo[*d*]imidazo[2,1-*b*]thiazole ((*R*)-(+)-NBTM):** 2-Chlorobenzothiazole (4.00 g, 24.0 mmol, 1.0 equiv) was added dropwise to a concentrated H<sub>2</sub>SO<sub>4</sub> (35 mL) in ice water bath (0 °C). Potassium nitrate (2.63 g, 26.0 mmol, 1.1 equiv) was then added at once. The resulting mixture was stirred at 0 °C for 1 h and then at room temperature (23 °C) for 2 h. The solution was subsequently poured onto ice. The precipitate was obtained by filtration and washed several times with ice cold water to obtain **31** with >95% purity as determined by <sup>1</sup>H NMR, which was used in the next step without further purification.

A 100 mL pressure tube containing a stirrer bar was charged with (*R*)-(-)-2-phenylglycinol (2.60 g, 19.0 mmol, 1.2 equiv), crude **31** (~3.40 g, 15.8 mmol, 1.0 equiv) and *i*Pr<sub>2</sub>NEt (55.0 mL, to make initial concentration of **31** 0.3 M). The resulting yellow suspension was stirred vigorously and heated to reflux at 130 °C, at which point the suspended solid had dissolved to leave a yellow solution. After 48 h at 130 °C, the orange reaction mixture was allowed to cool to room temperature (23 °C). Once cooled, the crude reaction mixture was diluted with EtOAc/PhMe/CH<sub>2</sub>Cl<sub>2</sub> (1:1:1, 150 mL) and quenched with 2N HCl (50 mL) under vigorous stirring. The aqueous layer was extracted with CH<sub>2</sub>Cl<sub>2</sub> (2 x 50 mL) and washed with brine (40 mL). The organic layer was then dried over anhydrous MgSO<sub>4</sub>, filtered, concentrated by rotary evaporation to deliver **32** that was used immediately without purification.

To a crude alcohol **32** (~5.00 g, 15.8 mmol, 1.0 equiv) dissolved in CH<sub>2</sub>Cl<sub>2</sub> (100 mL, to make initial concentration of **32** 0.15 M) was added dropwise Et<sub>3</sub>N (6.6 ml, 47.4 mmol, 3.0 equiv) and MsCl (1.8 ml, 23.7 mmol, 1.5 equiv) at 0 °C. The reaction mixture was stirred at 0°C for 1 h. MeOH (1.3 ml, 23.7 mmol, 1.5 equiv) was added *via* syringe and the mixture was stirred at room temperature for 30 minutes, then Et<sub>3</sub>N (22.0 ml, 158 mmol, 10 equiv) was added. The reaction mixture was refluxed at 60 °C for 18 h, cooled to room temperature, washed with brine, then dried over MgSO<sub>4</sub>, filtered, and evaporated. The residue was purified by an automated flash chromatography system (10→90% EtOAc/hexanes) providing 2.52 g (36% yield over 3 steps) of (*R*)-(+)-**NBTM** as a pale orange solid: TLC (EtOAc:hexanes, 1:1 *v/v*): R<sub>f</sub> = 0.30. [ $\alpha$ ]<sub>D</sub><sup>19.1</sup> = +88.42 (*c* = 0.38, CHCl<sub>3</sub>). <sup>1</sup>H NMR (500 MHz; CDCl<sub>3</sub>):  $\delta$  8.21 (dd, *J* = 2.1, 0.7 Hz, 1H), 8.15 (ddd, *J* = 8.7, 2.2, 0.9 Hz, 1H), 7.41-7.31 (m, 5H), 6.68 (dd, *J* = 8.7, 0.6 Hz, 1H), 5.77 (dd, *J* = 10.1, 7.8 Hz, 1H), 4.36 (td, *J* = 9.8, 0.7 Hz, 1H), 3.80 (ddd, *J* = 9.3, 7.8, 0.8 Hz, 1H); <sup>13</sup>C NMR (125 MHz; CDCl<sub>3</sub>):  $\delta$  165.1, 142.0, 141.7, 128.9 (2), 128.4, 128.0, 126.4 (2), 124.1, 119.1, 107.05, 107.04, 76.1, 52.0; IR (thin film): 1614, 1593, 1516 cm<sup>-1</sup>; HRMS (ESI+) *m/z* calcd for C<sub>15</sub>H<sub>12</sub>N<sub>3</sub>O<sub>2</sub>S [M+H]<sup>+</sup>: 298.0650, found: 298.0652.

**(*R*)-2-phenyl-7-(pyrrolidin-1-yl)-2,3-dihydrobenzo[*d*]imidazo[2,1-*b*]thiazole ((*R*)-(+)-**PBTM**):** A suspension of Fe (280 mg, 5.0 mmol, 10 equiv) in EtOH (5.0 mL, to make initial concentration of (*R*)-(+)-**NBTM** 0.1 M) and H<sub>2</sub>O (1.5 mL) was mixed with HCl (0.2 mL) at room temperature (23 °C). (*R*)-(+)-**NBTM** (150 mg, 0.5 mmol, 1.0 equiv) was added to the suspension and refluxed at 100 °C for 3 h. The resulting mixture was extracted with CH<sub>2</sub>Cl<sub>2</sub> (2 x 20 mL) and washed with brine. The solvent was removed under reduced pressure and the crude was used in the next step without further purification.

A THF (1.0 mL) solution of 2,5-dimethoxytetrahydrofuran (0.10 mL, 0.59 mmol, 1.3 equiv) and 2.5M H<sub>2</sub>SO<sub>4</sub> (0.50 mL, 1.13 mmol, 2.5 equiv) was added dropwise (*ca.* 20 min) to an open vessel containing a solution of the crude amine (~120 mg, 0.45 mmol, 1.0 equiv) in MeOH/THF (3.0 mL, 1:1) and NaBH<sub>4</sub> (70 mg, 1.8 mmol, 4.0 equiv)

was added under vigorous stirring at 0 °C. The mixture was then allowed to warm up to room temperature (23 °C) and stirred for 2 h. Then it was diluted with an aqueous NaHCO<sub>3</sub> solution (10 mL), extracted with CH<sub>2</sub>Cl<sub>2</sub> (3 × 30 mL), washed with brine, then dried over MgSO<sub>4</sub>, filtered, and evaporated. The residue was purified by an automated flash chromatography system (10→90% EtOAc/hexanes) providing 121 mg (75% yield over 2 steps) of (*R*)-(+)-**PBTM** as a pale orange solid: TLC (EtOAc:hexanes, 1:1 v/v): R<sub>f</sub> = 0.45.  $[\alpha]_D^{16.2} = +97.96$  (*c* = 0.49, CHCl<sub>3</sub>). <sup>1</sup>H NMR (500 MHz; CDCl<sub>3</sub>): δ 7.41-7.35 (m, 4H), 7.30-7.27 (m, 1H), 6.60-6.58 (m, 2H), 6.41 (dd, *J* = 8.5, 2.3 Hz, 1H), 5.62 (t, *J* = 9.3 Hz, 1H), 4.22 (t, *J* = 9.3 Hz, 1H), 3.66 (t, *J* = 8.5 Hz, 1H), 3.24 (t, *J* = 6.5 Hz, 4H), 2.03-2.01 (m, 4H); <sup>13</sup>C NMR (125 MHz; CDCl<sub>3</sub>): δ 167.5, 144.3, 143.3, 128.81, 128.63 (2), 127.8, 127.4, 126.6 (2), 109.8, 109.4, 106.7, 75.1, 53.4, 48.2 (2), 25.4 (2); IR (thin film): 2923, 2850, 1594, 1565 cm<sup>-1</sup>; HRMS (ESI+) *m/z* calcd for C<sub>19</sub>H<sub>20</sub>N<sub>3</sub>S [M+H]<sup>+</sup>: 322.1378, found: 322.1386.

**Representative procedure for the enantioselective and stereodivergent DAL process leading to a full stereoisomeric complement as described for bicyclic  $\gamma$ -lactones (–)-14e, (+)-14e', (+)-14e'' and (–)-14e''':**

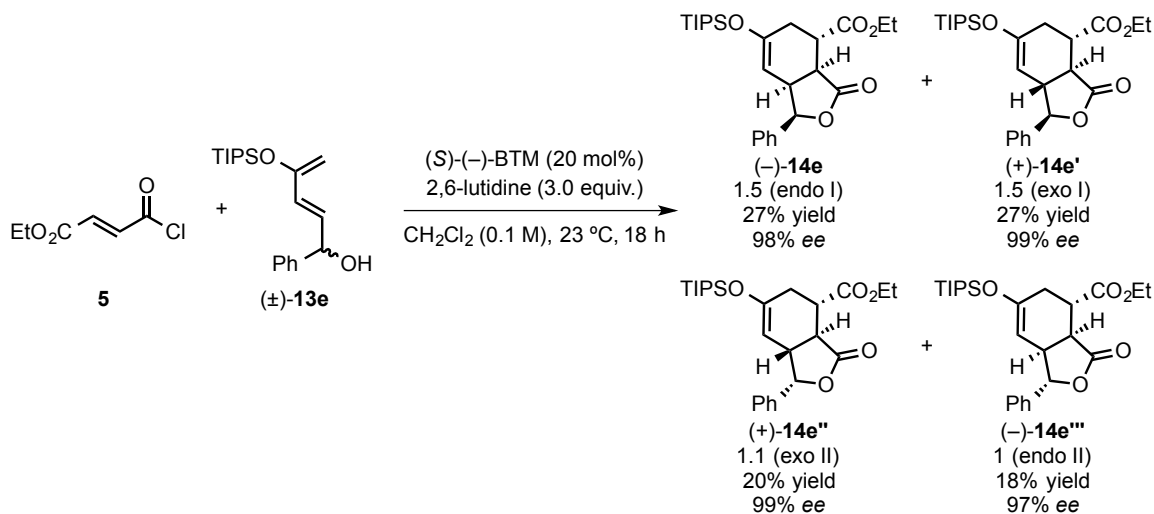

**Ethyl (1*R*,3*aS*,4*S*,7*aS*)-3-oxo-1-phenyl-6-((triisopropylsilyl)oxy)-1,3,3*a*,4,5,7*a*-hexahydroisobenzofuran-4-carboxylate ((–)-14e), ethyl (1*R*,3*aS*,4*S*,7*aR*)-3-oxo-1-phenyl-6-((triisopropylsilyl)oxy)-1,3,3*a*,4,5,7*a*-hexahydroisobenzofuran-4-carboxylate ((+)-14e'), ethyl (1*S*,3*aS*,4*S*,7*aR*)-3-oxo-1-phenyl-6-((triisopropylsilyl)oxy)-1,3,3*a*,4,5,7*a*-hexahydroisobenzofuran-4-carboxylate ((+)-14e'') and ethyl (1*S*,3*aS*,4*S*,7*aS*)-3-oxo-1-phenyl-6-((triisopropylsilyl)oxy)-1,3,3*a*,4,5,7*a*-hexahydroisobenzofuran-4-carboxylate ((–)-14e''')**: Prepared according to the representative procedure using silyloxydiene alcohol ( $(\pm)$ -**13e**) (33 mg, 0.10 mmol, 1.0 equiv), (S)-(-)-BTM (5.0 mg, 0.020 mmol, 20 mol%), 2,6-lutidine (35  $\mu\text{L}$ , 0.30 mmol, 3.0 equiv) in anhydrous  $\text{CH}_2\text{Cl}_2$  (0.7 mL, to make final concentration of silyloxydiene alcohol 0.1 M) and ethyl fumaroyl chloride **5** (20  $\mu\text{L}$ , 0.15 mmol, dissolved in 0.3 mL  $\text{CH}_2\text{Cl}_2$ , 1.5 equiv) at ambient temperature (23 °C). Upon completion (as judged by TLC), the reaction mixture was purified by an automated flash chromatography (5 $\rightarrow$ 20% EtOAc/hexanes) to afford bicyclic  $\gamma$ -lactones (–)-**14e** (12.1 mg, 27% yield, 98% ee), (+)-**14e'** (12.0 mg, 27% yield, 99% ee), (+)-**14e''** (9.0 mg, 20% yield, 99% ee) and (–)-**14e'''** (8.3 mg, 18% yield, 97% ee).



(-)-**14e**: clear colorless oil; TLC (EtOAc:hexanes, 1:9 v/v):  $R_f = 0.49$ ;  $[\alpha]_D^{21.0} = -16.40$  ( $c = 10.00$ ,  $\text{CHCl}_3$ ). Enantiomeric excess was determined by chiral HPLC analysis in comparison with authentic racemic material using a Chiralcel OD-H column: hexanes:*i*-PrOH = 95:05, flow rate 0.5 mL/min,  $\lambda = 210$  nm:  $t_{\text{major}} = 11.3$  min,  $t_{\text{minor}} = 13.6$  min; 98% *ee*. Absolute stereochemistry was assigned by analogy to amide (-)-**S21**.  $^1\text{H}$  NMR (500 MHz;  $\text{CDCl}_3$ ):  $\delta$  7.40-7.37 (m, 2H), 7.34-7.29 (m, 3H), 5.20 (d,  $J = 2.2$  Hz, 1H), 4.92 (dd,  $J = 2.9, 1.8$  Hz, 1H), 4.18-4.07 (m, 2H), 3.28-3.24 (m, 2H), 3.20 (dd,  $J = 7.6, 4.1$  Hz, 1H), 2.51 (ddq,  $J = 17.6, 2.6, 0.8$  Hz, 1H), 2.44 (ddt,  $J = 17.6, 6.5, 2.1$  Hz, 1H), 1.22 (t,  $J = 7.1$  Hz, 3H), 1.19-1.14 (m, 3H), 1.07 (dd,  $J = 7.2, 1.7$  Hz, 18H);  $^{13}\text{C}$  NMR (125 MHz;  $\text{CDCl}_3$ ):  $\delta$  177.1, 172.8, 151.4, 138.8, 128.9 (2), 128.4, 125.0 (2), 101.6, 85.9, 61.4, 42.6, 38.3, 38.1, 28.8, 18.0 (6), 14.2, 12.4 (3); IR (thin film): 2944, 2867, 1779, 1732, 1667  $\text{cm}^{-1}$ ; HRMS (ESI+)  $m/z$  calcd for  $\text{C}_{26}\text{H}_{39}\text{O}_5\text{Si}$   $[\text{M}+\text{H}]^+$ : 459.2567, found: 459.2589.

(+)-**14e'**: clear colorless oil; TLC (EtOAc:hexanes, 1:9 v/v):  $R_f = 0.43$ ;  $[\alpha]_D^{20.2} = +35.20$  ( $c = 10.00$ ,  $\text{CHCl}_3$ ). Enantiomeric excess was determined by chiral HPLC analysis in comparison with authentic racemic material using a Chiralcel OD-H column: hexanes:*i*-PrOH = 95:05, flow rate 0.5 mL/min,  $\lambda = 210$  nm:  $t_{\text{major}} = 22.8$  min,  $t_{\text{minor}} = 34.0$  min; 99% *ee*. Absolute stereochemistry was assigned by analogy to amide (-)-**S21**.  $^1\text{H}$  NMR (500 MHz;  $\text{CDCl}_3$ ):  $\delta$  7.43-7.33 (m, 5H), 4.96 (d,  $J = 9.7$  Hz, 1H), 4.88 (d,  $J = 1.4$  Hz, 1H), 4.33-4.22 (m, 2H), 2.90-2.86 (m, 2H), 2.85-2.78 (m, 1H), 2.56-2.44 (m, 2H), 1.33 (t,  $J = 7.1$  Hz, 3H), 1.15-1.08 (m, 3H), 1.05 (t,  $J = 6.6$  Hz, 18H);  $^{13}\text{C}$  NMR (125 MHz;  $\text{CDCl}_3$ ):  $\delta$  173.1, 172.8, 153.0, 136.5, 129.1, 129.0 (2), 126.1 (2), 98.7, 84.8, 61.4, 48.2, 46.6, 39.4, 34.4, 18.0 (6), 14.2, 12.6 (3); IR (thin film): 2945, 2868, 1790, 1738, 1650  $\text{cm}^{-1}$ ; HRMS (ESI+)  $m/z$  calcd for  $\text{C}_{26}\text{H}_{39}\text{O}_5\text{Si}$   $[\text{M}+\text{H}]^+$ : 459.2567, found: 459.2544.

(+)-**14e''**: clear colorless oil; TLC (EtOAc:hexanes, 1:9 v/v):  $R_f = 0.38$ ;  $[\alpha]_D^{21.2} = +30.80$  ( $c = 10.00$ ,  $\text{CHCl}_3$ ). Enantiomeric excess was determined by chiral HPLC analysis in comparison with authentic racemic material using a Chiralcel OD-H column:

hexanes:<sup>i</sup>PrOH = 95:05, flow rate 0.5 mL/min,  $\lambda$  = 210 nm:  $t_{\text{minor}}$  = 21.7 min,  $t_{\text{major}}$  = 37.0 min; 99% *ee*. Absolute stereochemistry was assigned by derivatization as described on page S28. <sup>1</sup>H NMR (500 MHz; CDCl<sub>3</sub>):  $\delta$  7.37-7.30 (m, 3H), 7.19-7.17 (m, 2H), 5.64 (d,  $J$  = 7.4 Hz, 1H), 4.84 (d,  $J$  = 1.2 Hz, 1H), 4.31-4.18 (m, 2H), 3.35 (dddd,  $J$  = 13.5, 7.6, 3.6, 1.9 Hz, 1H), 2.83 (ddd,  $J$  = 11.6, 10.4, 6.9 Hz, 1H), 2.73 (dd,  $J$  = 13.6, 11.6 Hz, 1H), 2.43 (dddd,  $J$  = 17.7, 6.9, 2.0, 1.1 Hz, 1H), 2.22 (dddd,  $J$  = 17.6, 10.4, 3.5, 1.9 Hz, 1H), 1.31 (t,  $J$  = 7.1 Hz, 3H), 1.05-1.02 (m, 3H), 0.94-0.84 (m, 18H); <sup>13</sup>C NMR (125 MHz; CDCl<sub>3</sub>):  $\delta$  174.2, 173.0, 151.8, 134.9, 128.5 (2), 128.3, 125.5 (2), 100.0, 81.3, 61.3, 43.7, 40.6, 39.5, 34.1, 17.9 (6), 14.2, 12.3 (3); IR (thin film): 2945, 2867, 1790, 1738, 1650 cm<sup>-1</sup>; HRMS (ESI+)  $m/z$  calcd for C<sub>26</sub>H<sub>39</sub>O<sub>5</sub>Si [M+H]<sup>+</sup>: 459.2567, found: 459.2584.

(-)-**14e'''**: clear colorless oil; TLC (EtOAc:hexanes, 1:9 *v/v*):  $R_f$  = 0.31;  $[\alpha]_D^{21.1} = -15.20$  ( $c$  = 10.00, CHCl<sub>3</sub>). Enantiomeric excess was determined by chiral HPLC analysis in comparison with authentic racemic material using a Chiralcel AS-H column: hexanes:<sup>i</sup>PrOH = 95:05, flow rate 0.5 mL/min,  $\lambda$  = 210 nm:  $t_{\text{major}}$  = 15.5 min,  $t_{\text{minor}}$  = 28.2 min; 97% *ee*. Absolute stereochemistry was assigned by analogy to amide (-)-**S21**. <sup>1</sup>H NMR (500 MHz; CDCl<sub>3</sub>):  $\delta$  7.37-7.32 (m, 2H), 7.29-7.26 (m, 1H), 7.25-7.23 (m, 2H), 5.63 (d,  $J$  = 5.2 Hz, 1H), 4.19-4.11 (m, 2H), 3.99-3.99 (m, 1H), 3.59-3.55 (m, 1H), 3.49 (dd,  $J$  = 6.8, 2.6 Hz, 1H), 3.34 (dt,  $J$  = 5.4, 2.8 Hz, 1H), 2.48-2.46 (m, 2H), 1.25 (t,  $J$  = 7.1 Hz, 3H), 0.90-0.82 (m, 21H); <sup>13</sup>C NMR (125 MHz; CDCl<sub>3</sub>):  $\delta$  176.8, 173.0, 151.4, 135.7, 128.5 (2), 127.9, 125.3 (2), 97.8, 82.9, 61.3, 41.9, 40.0, 37.8, 27.9, 17.8 (6), 14.2, 12.2 (3); IR (thin film): 2945, 2867, 1778, 1731, 1665 cm<sup>-1</sup>; HRMS (ESI+)  $m/z$  calcd for C<sub>26</sub>H<sub>39</sub>O<sub>5</sub>Si [M+H]<sup>+</sup>: 459.2567, found: 459.2592.

**Use of a lower catalyst loading for the DAL (10 mol%) as described for bicyclic  $\gamma$ -lactones (-)-14e, (+)-14e', (+)-14e'' and (-)-14e''' on gram scale:** This reaction was performed according to the procedure described above for (-)-**14e**, (+)-**14e'**, (+)-**14e''** and (-)-**14e'''** with the exception that a lower catalyst loading (10 vs. 20 mol%), and a longer addition time (10 vs. 5 h) were employed. Silyloxydiene alcohol ( $\pm$ )-**13e** (3.30 g,

9.92 mmol, 1.0 equiv), (*S*)-(-)-BTM (250 mg, 0.99 mmol, 10 mol%), 2,6-lutidine (3.47 mL, 29.7 mmol, 3.0 equiv) in anhydrous CH<sub>2</sub>Cl<sub>2</sub> (80 mL, to make final concentration of silyloxydiene alcohol 0.1 M) and ethyl fumaroyl chloride **5** (2.0 mL, 14.8 mmol, dissolved in 15 mL CH<sub>2</sub>Cl<sub>2</sub>, 1.5 equiv) at ambient temperature (23 °C). The solution of ethyl fumaroyl chloride **5** was added by syringe pump over 10 h and the reaction was allowed to stir for 8 h at ambient temperature (23 °C). Upon completion (as judged by TLC), the reaction mixture was purified by an automated flash chromatography (5→20% EtOAc/hexanes) to afford bicyclic  $\gamma$ -lactones (-)-**14e** (0.80 g, 18% yield, 98% *ee*), (+)-**14e'** (0.74 g, 16% yield, 99% *ee*), (+)-**14e''** (0.69 g, 15% yield, 99% *ee*), (-)-**14e'''** (0.68 g, 15% yield, 97% *ee*) and ester ( $\pm$ )-**S20** (0.54 g, 12% yield). All spectral data matched that reported above.

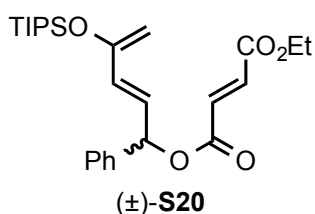

**Ethyl ((*E*)-1-phenyl-4-((triisopropylsilyl)oxy)penta-2,4-dien-1-yl) fumarate (( $\pm$ )-**S20**):** pale yellow oil; TLC (EtOAc:hexanes, 1:9 v/v):  $R_f = 0.77$ ;  $[\alpha]_D^{21.1} = 0.00$  ( $c = 3.00$ , CHCl<sub>3</sub>). <sup>1</sup>H NMR (500 MHz; CDCl<sub>3</sub>):  $\delta$  7.37-7.36 (m, 3H), 7.32-7.29 (m, 2H), 7.15 (dd,  $J = 15.9, 10.9$  Hz, 1H), 6.94-6.85 (m, 2H), 6.48 (d,  $J = 15.9$  Hz, 1H), 5.68 (d,  $J = 10.9$  Hz, 1H), 4.68 (s, 2H), 4.27 (q,  $J = 7.1$  Hz, 2H), 1.33 (t,  $J = 7.1$  Hz, 3H), 1.27-1.20 (m, 3H), 1.14 (d,  $J = 7.2$  Hz, 18H); <sup>13</sup>C NMR (125 MHz; CDCl<sub>3</sub>):  $\delta$  165.0, 164.7, 146.6, 138.0, 134.5, 133.1, 130.4, 128.8 (2), 127.3, 126.3 (2), 122.7, 113.5, 67.1, 61.6, 18.1 (6), 14.2, 13.3 (3); IR (thin film): 2944, 2867, 1727, 1645 cm<sup>-1</sup>; HRMS (ESI+)  $m/z$  calcd for C<sub>26</sub>H<sub>39</sub>O<sub>5</sub>Si [M+H]<sup>+</sup>: 459.2567, found: 459.2582.

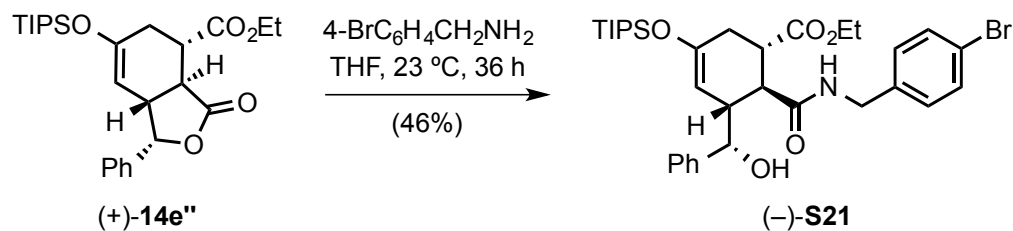

**Ethyl (1*S*,5*R*,6*S*)-6-((4-bromobenzyl)carbamoyl)-5-((*S*)-hydroxy(phenyl)methyl)-3-((triisopropylsilyl)oxy)cyclohex-3-ene-1-carboxylate ((-)-**S21**):** Into an oven-dried, 5-mL round-bottomed flask containing a solution of bicyclic  $\gamma$ -lactone (+)-**14e''** (50 mg, 0.11 mmol, 1.0 equiv) in THF (1.1 mL, to make final concentration of bicyclic  $\gamma$ -lactone 0.1 M), was added dropwise 4-bromobenzylamine (70  $\mu$ L, 0.55 mmol, 5.0 equiv). The reaction was allowed to stir at ambient temperature (23  $^\circ$ C) for 36 h. Upon completion (as judged by TLC), the reaction was concentrated by rotary evaporation and purified by an automated flash chromatography system (20 $\rightarrow$ 50% EtOAc/hexanes) to afford amide (-)-**S21** (32 mg, 46% yield) as a white solid: m.p. 151-155  $^\circ$ C (recrystallized from Et<sub>2</sub>O); TLC (EtOAc:hexanes, 1:2 v/v):  $R_f = 0.49$ ;  $[\alpha]_D^{20.4} = -13.95$  ( $c = 0.86$ , CHCl<sub>3</sub>). Absolute stereochemistry was assigned based on X-ray analysis using anomalous dispersion (see **Figure S1**). <sup>1</sup>H NMR (500 MHz; CDCl<sub>3</sub>):  $\delta$  7.42 (d,  $J = 8.3$  Hz, 2H), 7.37-7.34 (m, 2H), 7.29-7.24 (m, 3H), 7.19 (d,  $J = 8.3$  Hz, 2H), 6.73 (t,  $J = 6.0$  Hz, 1H), 4.82 (d,  $J = 4.6$  Hz, 1H), 4.51 (dd,  $J = 14.9, 6.5$  Hz, 1H), 4.42 (s, 1H), 4.30 (dd,  $J = 15.0, 5.5$  Hz, 1H), 4.09-3.97 (m, 2H), 3.10-3.06 (m, 2H), 2.83 (dd,  $J = 11.6, 10.4$  Hz, 1H), 2.41-2.24 (m, 2H), 1.22 (t,  $J = 7.1$  Hz, 3H), 1.07-1.03 (m, 3H), 0.99 (dd,  $J = 14.2, 6.1$  Hz, 18H); <sup>13</sup>C NMR (125 MHz; CDCl<sub>3</sub>):  $\delta$  174.7, 173.8, 151.9, 142.4, 137.6, 131.8 (2), 129.7 (2), 128.3 (2), 127.2, 125.3 (2), 121.3, 98.5, 73.0, 61.1, 45.9, 45.5, 43.2, 43.1, 32.9, 18.0 (6), 14.2, 12.5 (3); IR (thin film): 3316, 2925, 2866, 1728, 1673, 1645 cm<sup>-1</sup>; HRMS (ESI+)  $m/z$  calcd for C<sub>33</sub>H<sub>47</sub>BrNO<sub>5</sub>Si [M+H]<sup>+</sup>: 644.2407, found: 644.2384.

**Figure S1. Single crystal X-ray structure (ORTEP) of amide (–)-S21.** The crystals were grown from a concentrated solution of amide (–)-S21 in Et<sub>2</sub>O (2.0 mL), using a slow evaporation method (probability ellipsoids are shown at the 50% level). X-ray crystallographic data have been deposited in the Cambridge Crystallographic Data Centre database (<http://www.ccdc.cam.ac.uk/>) under accession code CCDC 972246.

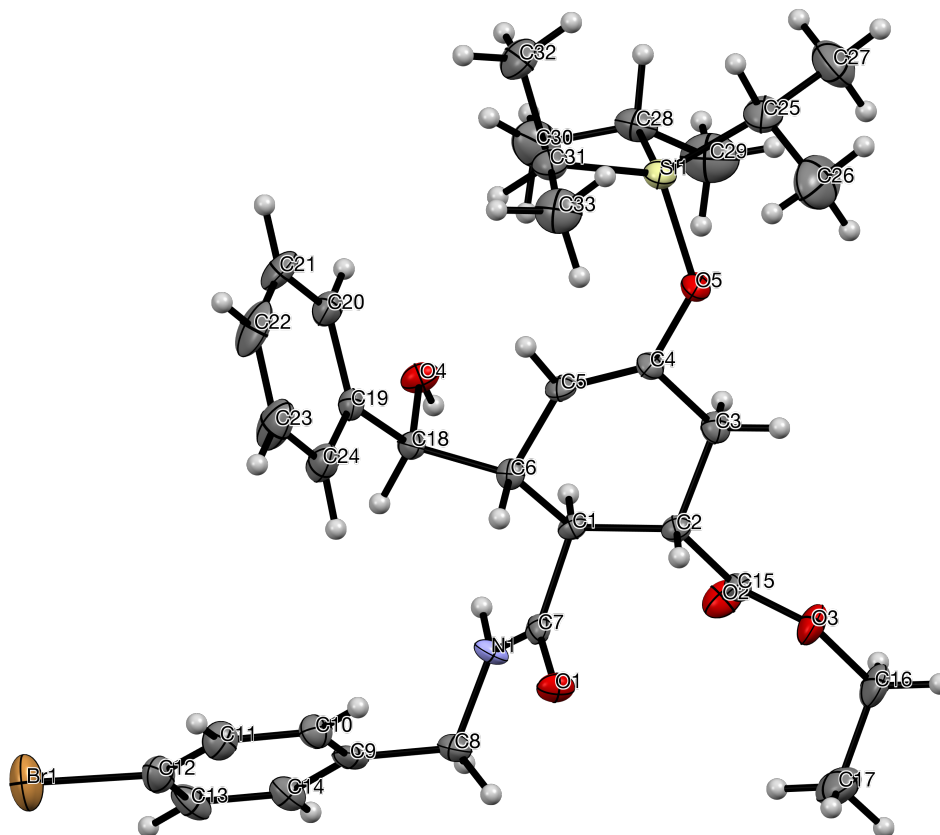

**Alert level B:**

Crystal system given = orthorhombic

PLAT019\_ALERT\_1\_B Check \_diffn\_measured\_fraction\_theta\_full/\_max ... 0.890.

Author Response: Data was collected on a Bruker GADDS instrument with Cu-source and MWPC (multiwire proportional counter) detector. Under these experimental conditions the maximum angle that can be collected is 120 degrees two-theta.

**Table 1. Crystal data and structure refinement for DRB\_MA\_131001\_G\_1075C.**

| <b>Crystal Parameters</b>       | <b>Crystal Data</b>                                                                            |
|---------------------------------|------------------------------------------------------------------------------------------------|
| Identification code             | 1075c                                                                                          |
| Empirical formula               | C <sub>33</sub> H <sub>46</sub> Br N O <sub>5</sub> Si                                         |
| Formula weight                  | 644.71                                                                                         |
| Temperature                     | 110.15 K                                                                                       |
| Wavelength                      | 1.54178 Å                                                                                      |
| Crystal system                  | Orthorhombic                                                                                   |
| Space group                     | P 21 21 21                                                                                     |
| Unit cell dimensions            | a = 9.0910(3) Å      α = 90°<br>b = 18.1061(7) Å      β = 90°<br>c = 20.6924(7) Å      γ = 90° |
| Volume                          | 3406.0(2) Å <sup>3</sup>                                                                       |
| Z                               | 4                                                                                              |
| Density (calculated)            | 1.257 Mg/m <sup>3</sup>                                                                        |
| Absorption coefficient          | 2.285 mm <sup>-1</sup>                                                                         |
| F(000)                          | 1360                                                                                           |
| Crystal size                    | 0.23 x 0.01 x 0.01 mm <sup>3</sup>                                                             |
| Theta range for data collection | 3.243 to 62.561°                                                                               |
| Index ranges                    | -10 ≤ h ≤ 9, -20 ≤ k ≤ 20, -22 ≤ l ≤ 23                                                        |
| Reflections collected           | 34574                                                                                          |
| Independent reflections         | 5224 [R(int) = 0.0645]                                                                         |
| Completeness to theta = 67.679° | 86.9%                                                                                          |
| Absorption correction           | Semi-empirical from equivalents                                                                |
| Max. and min. transmission      | 0.7522 and 0.6042                                                                              |
| Refinement method               | Full-matrix least-squares on F <sup>2</sup>                                                    |
| Data / restraints / parameters  | 5224 / 0 / 378                                                                                 |

|                                      |                                    |
|--------------------------------------|------------------------------------|
| Goodness-of-fit on $F^2$             | 1.126                              |
| Final R indices [ $I > 2\sigma(I)$ ] | $R_1 = 0.0328$ , $wR_2 = 0.0707$   |
| R indices (all data)                 | $R_1 = 0.0423$ , $wR_2 = 0.0774$   |
| Absolute structure parameter         | -0.005(8)                          |
| Extinction coefficient               | N/A                                |
| Largest diff. peak and hole          | 0.319 and -0.512 e.Å <sup>-3</sup> |

**Table 2.** Atomic coordinates ( $\times 10^4$ ) and equivalent isotropic displacement parameters ( $\text{Å}^2 \times 10^3$ ) for DRB\_MA\_131001\_G\_1075C.  $U(\text{eq})$  is defined as one third of the trace of the orthogonalized  $U^{ij}$  tensor.

| Atom  | x       | y        | z       | $U(\text{eq})$ |
|-------|---------|----------|---------|----------------|
| Br(1) | 2728(1) | 4280(1)  | 8166(1) | 44(1)          |
| Si(1) | 3297(1) | -1217(1) | 4487(1) | 22(1)          |
| O(1)  | 1441(3) | 2784(2)  | 4768(1) | 21(1)          |
| O(2)  | 4103(3) | 2482(2)  | 3520(2) | 28(1)          |
| O(3)  | 1952(3) | 2162(2)  | 3052(1) | 28(1)          |
| O(4)  | 4949(3) | 1042(2)  | 5764(1) | 22(1)          |
| O(5)  | 2642(3) | -439(1)  | 4168(1) | 22(1)          |
| N(1)  | 3780(4) | 3040(2)  | 5064(2) | 18(1)          |
| C(1)  | 3183(4) | 1797(2)  | 4697(2) | 15(1)          |
| C(2)  | 2520(4) | 1584(2)  | 4038(2) | 17(1)          |
| C(3)  | 3025(4) | 811(2)   | 3845(2) | 19(1)          |
| C(4)  | 2728(5) | 280(2)   | 4383(2) | 18(1)          |
| C(5)  | 2498(5) | 489(2)   | 4985(2) | 19(1)          |
| C(6)  | 2589(4) | 1271(2)  | 5224(2) | 16(1)          |
| C(7)  | 2740(5) | 2585(2)  | 4851(2) | 17(1)          |
| C(8)  | 3504(5) | 3817(2)  | 5227(2) | 21(1)          |

|       |         |          |         |       |
|-------|---------|----------|---------|-------|
| C(9)  | 3297(4) | 3935(2)  | 5944(2) | 21(1) |
| C(10) | 2274(5) | 3523(2)  | 6290(2) | 24(1) |
| C(11) | 2083(5) | 3633(2)  | 6946(2) | 28(1) |
| C(12) | 2938(5) | 4152(2)  | 7260(2) | 28(1) |
| C(13) | 3945(5) | 4578(2)  | 6928(2) | 29(1) |
| C(14) | 4122(5) | 4467(2)  | 6267(2) | 23(1) |
| C(15) | 2976(5) | 2129(2)  | 3519(2) | 20(1) |
| C(16) | 2231(6) | 2687(3)  | 2533(2) | 36(1) |
| C(17) | 1646(6) | 3434(3)  | 2714(3) | 43(1) |
| C(18) | 3502(4) | 1306(2)  | 5860(2) | 18(1) |
| C(19) | 2751(4) | 847(2)   | 6376(2) | 19(1) |
| C(20) | 3374(5) | 194(2)   | 6595(2) | 26(1) |
| C(21) | 2599(5) | -255(3)  | 7025(2) | 32(1) |
| C(22) | 1229(5) | -45(3)   | 7241(2) | 42(1) |
| C(23) | 627(5)  | 615(3)   | 7036(2) | 41(1) |
| C(24) | 1383(5) | 1063(3)  | 6611(2) | 30(1) |
| C(25) | 2632(6) | -1946(2) | 3902(2) | 34(1) |
| C(26) | 1200(7) | -1727(3) | 3572(3) | 57(2) |
| C(27) | 3760(7) | -2181(3) | 3392(3) | 53(2) |
| C(28) | 5352(5) | -1166(3) | 4542(2) | 31(1) |
| C(29) | 6061(6) | -795(3)  | 3948(3) | 52(2) |
| C(30) | 5946(6) | -799(3)  | 5157(3) | 46(1) |
| C(31) | 2506(5) | -1392(2) | 5311(2) | 27(1) |
| C(32) | 3065(6) | -2124(3) | 5592(2) | 38(1) |
| C(33) | 821(5)  | -1363(3) | 5330(3) | 38(1) |

---



**Figure S2: Chiral HPLC determinations of enantiomeric excess of lactones 14a-d and 14a'-d':**

**Determination of enantiomeric excess of bicyclic  $\gamma$ -lactone (–)-14a:**

**Chiral HPLC analysis of bicyclic  $\gamma$ -lactone (–)-14a:** Chiralcel OD-H column: hexanes:<sup>i</sup>PrOH = 95:05, flow rate 0.5 mL/min,  $\lambda$  = 210 nm:  $t_{\text{major}}$  = 11.4 min,  $t_{\text{minor}}$  = 13.4 min; 99% *ee*.

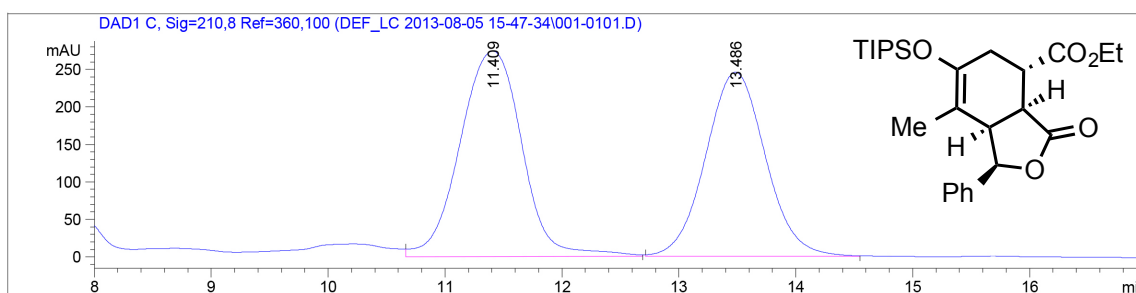

Signal 3: DAD1 C, Sig=210,8 Ref=360,100

| Peak # | RetTime [min] | Type | Width [min] | Area [mAU*s] | Height [mAU] | Area %  |
|--------|---------------|------|-------------|--------------|--------------|---------|
| 1      | 11.409        | VB   | 0.5858      | 1.00989e4    | 274.13562    | 53.6631 |
| 2      | 13.486        | BB   | 0.5504      | 8720.16016   | 245.47592    | 46.3369 |

Totals : 1.88191e4 519.61154

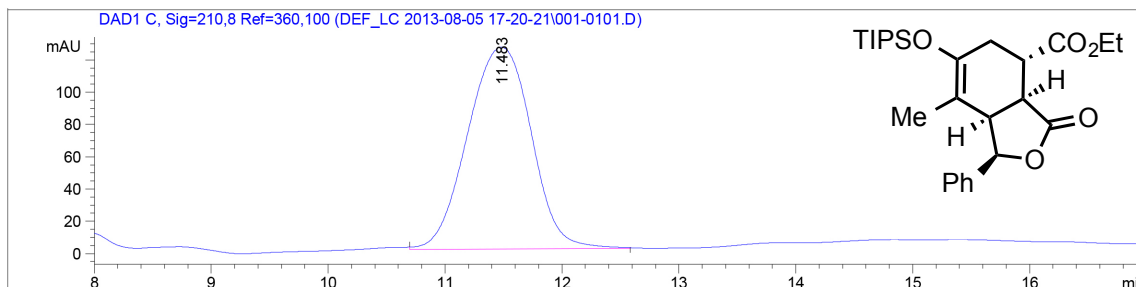

Signal 3: DAD1 C, Sig=210,8 Ref=360,100

| Peak # | RetTime [min] | Type | Width [min] | Area [mAU*s] | Height [mAU] | Area %   |
|--------|---------------|------|-------------|--------------|--------------|----------|
| 1      | 11.483        | BB   | 0.6047      | 4723.80225   | 125.05634    | 100.0000 |

Totals : 4723.80225 125.05634

## Determination of enantiomeric excess of bicyclic $\gamma$ -lactone (+)-14a':

**Chiral HPLC analysis of bicyclic  $\gamma$ -lactone (+)-14a'**: Chiralcel AS-H column: hexanes:PrOH = 95:05, flow rate 0.5 mL/min,  $\lambda = 210$  nm:  $t_{\text{major}} = 16.9$  min,  $t_{\text{minor}} = 19.4$  min; 98% *ee*.

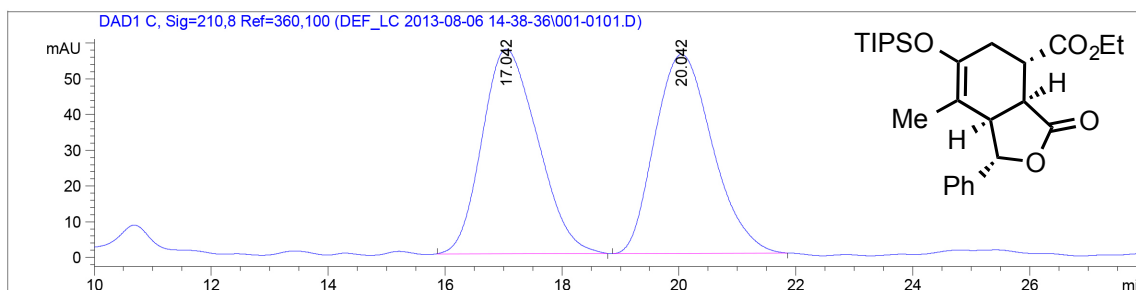

Signal 3: DAD1 C, Sig=210,8 Ref=360,100

| Peak # | RetTime [min] | Type | Width [min] | Area [mAU*s] | Height [mAU] | Area %  |
|--------|---------------|------|-------------|--------------|--------------|---------|
| 1      | 17.042        | BB   | 0.9989      | 3786.13672   | 57.29754     | 49.6845 |
| 2      | 20.042        | BB   | 1.0521      | 3834.22778   | 55.77229     | 50.3155 |

Totals : 7620.36450 113.06982

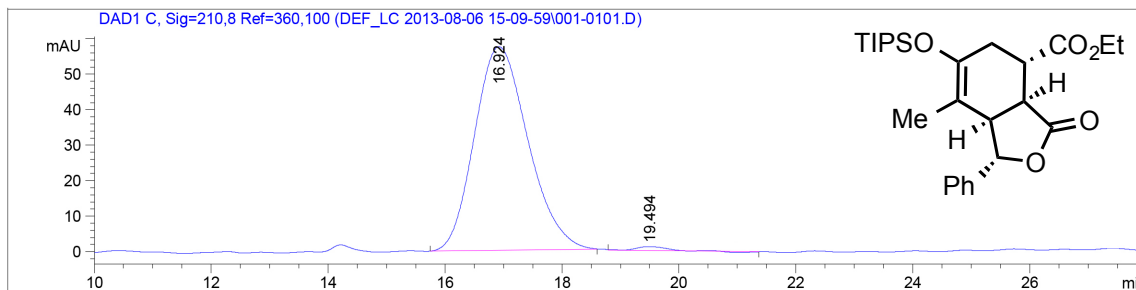

Signal 3: DAD1 C, Sig=210,8 Ref=360,100

| Peak # | RetTime [min] | Type | Width [min] | Area [mAU*s] | Height [mAU] | Area %  |
|--------|---------------|------|-------------|--------------|--------------|---------|
| 1      | 16.924        | BB   | 0.9644      | 3652.71582   | 57.39919     | 98.9651 |
| 2      | 19.494        | MM   | 0.5868      | 38.19721     | 1.08484      | 1.0349  |

Totals : 3690.91303 58.48403

## Determination of enantiomeric excess of bicyclic $\gamma$ -lactone (+)-14b:

**Chiral HPLC analysis of bicyclic  $\gamma$ -lactone (+)-14b:** Chiralcel OD-H column: hexanes:PrOH = 95:05, flow rate 0.5 mL/min,  $\lambda = 210$  nm:  $t_{\text{major}} = 12.0$  min,  $t_{\text{minor}} = 16.1$  min; 99% *ee*.

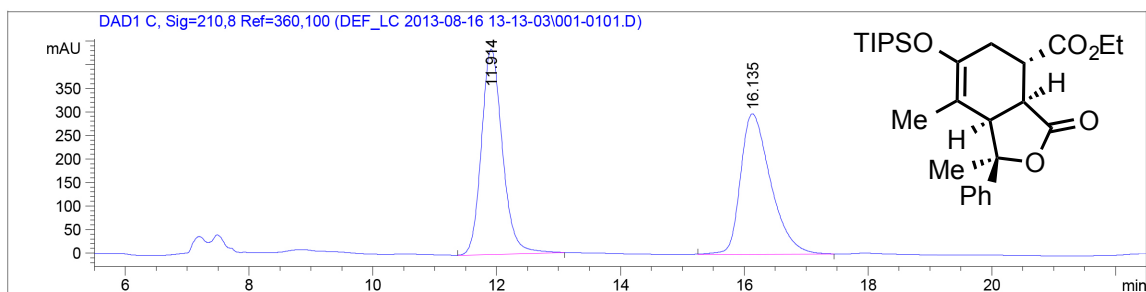

Signal 3: DAD1 C, Sig=210,8 Ref=360,100

| Peak # | RetTime [min] | Type | Width [min] | Area [mAU*s] | Height [mAU] | Area %  |
|--------|---------------|------|-------------|--------------|--------------|---------|
| 1      | 11.914        | BB   | 0.3629      | 1.02704e4    | 435.91010    | 50.5007 |
| 2      | 16.135        | BB   | 0.5138      | 1.00668e4    | 298.20029    | 49.4993 |

Totals : 2.03372e4 734.11038

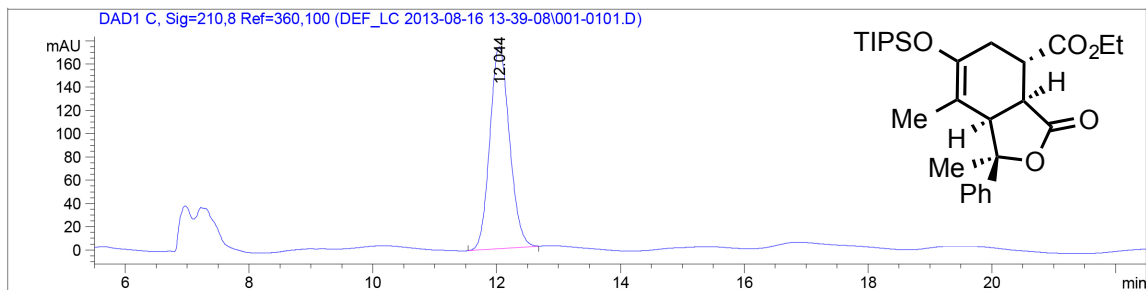

Signal 3: DAD1 C, Sig=210,8 Ref=360,100

| Peak # | RetTime [min] | Type | Width [min] | Area [mAU*s] | Height [mAU] | Area %   |
|--------|---------------|------|-------------|--------------|--------------|----------|
| 1      | 12.044        | BB   | 0.3434      | 3834.70825   | 173.81255    | 100.0000 |

Totals : 3834.70825 173.81255

## Determination of enantiomeric excess of bicyclic $\gamma$ -lactone (+)-14b':

**Chiral HPLC analysis of bicyclic  $\gamma$ -lactone (+)-14b':** Chiralcel AD-H column: hexanes:PrOH = 95:05, flow rate 0.8 mL/min,  $\lambda = 210$  nm:  $t_{\text{major}} = 6.5$  min,  $t_{\text{minor}} = 7.9$  min; 99% *ee*.

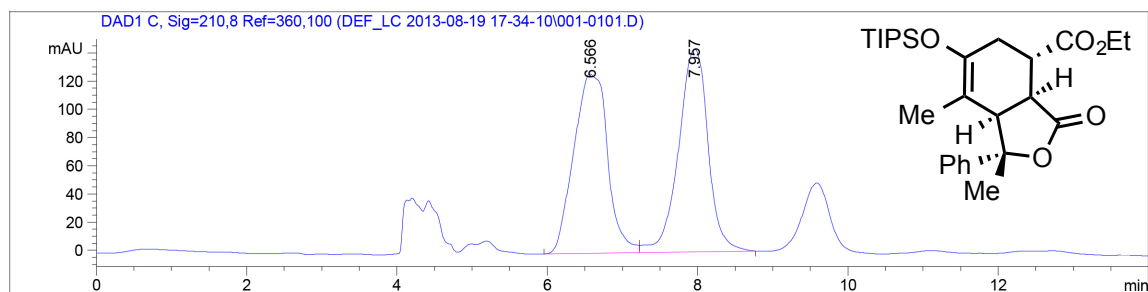

Signal 3: DAD1 C, Sig=210,8 Ref=360,100

| Peak # | RetTime [min] | Type | Width [min] | Area [mAU*s] | Height [mAU] | Area %  |
|--------|---------------|------|-------------|--------------|--------------|---------|
| 1      | 6.566         | BV   | 0.4437      | 3982.09033   | 127.05120    | 50.2380 |
| 2      | 7.957         | VB   | 0.4200      | 3944.36377   | 143.80565    | 49.7620 |

Totals : 7926.45410 270.85685

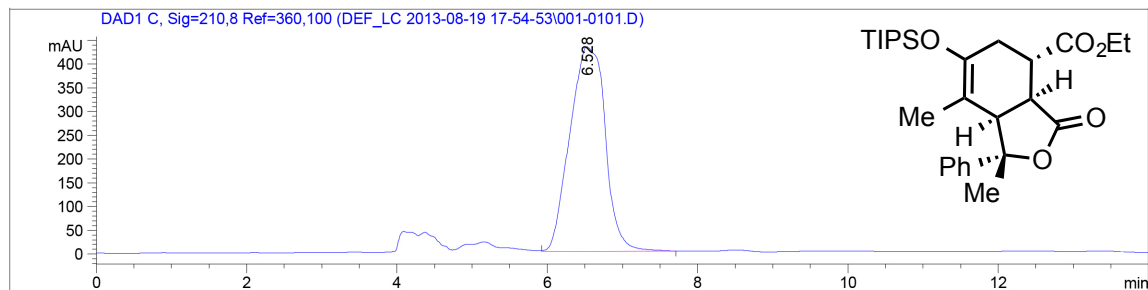

Signal 3: DAD1 C, Sig=210,8 Ref=360,100

| Peak # | RetTime [min] | Type | Width [min] | Area [mAU*s] | Height [mAU] | Area %   |
|--------|---------------|------|-------------|--------------|--------------|----------|
| 1      | 6.528         | BB   | 0.4637      | 1.41129e4    | 431.31570    | 100.0000 |

Totals : 1.41129e4 431.31570

## Determination of enantiomeric excess of bicyclic $\gamma$ -lactone (+)-14c:

**Chiral HPLC analysis of bicyclic  $\gamma$ -lactone (+)-14c:** Chiralpak IA column: hexanes:PrOH = 95:05, flow rate 0.5 mL/min,  $\lambda = 210$  nm:  $t_{\text{major}} = 28.9$  min,  $t_{\text{minor}} = 43.7$  min; 99% *ee*.

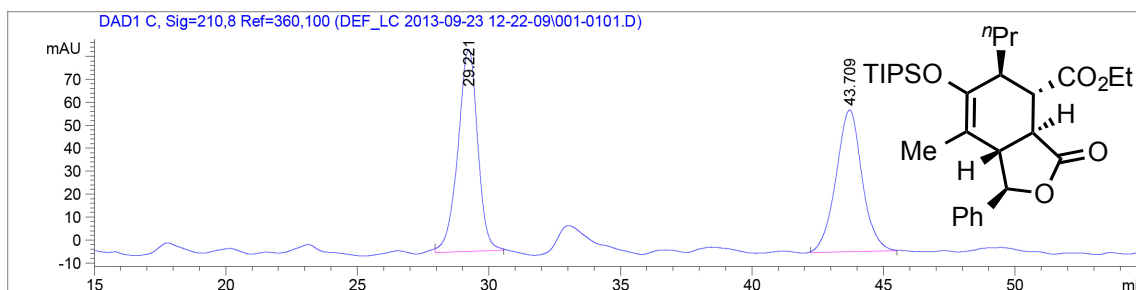

Signal 3: DAD1 C, Sig=210,8 Ref=360,100

| Peak # | RetTime [min] | Type | Width [min] | Area [mAU*s] | Height [mAU] | Area %  |
|--------|---------------|------|-------------|--------------|--------------|---------|
| 1      | 29.221        | BB   | 0.6228      | 4598.02588   | 88.11724     | 51.9386 |
| 2      | 43.709        | BB   | 0.9143      | 4254.78027   | 61.71974     | 48.0614 |

Totals : 8852.80615 149.83698

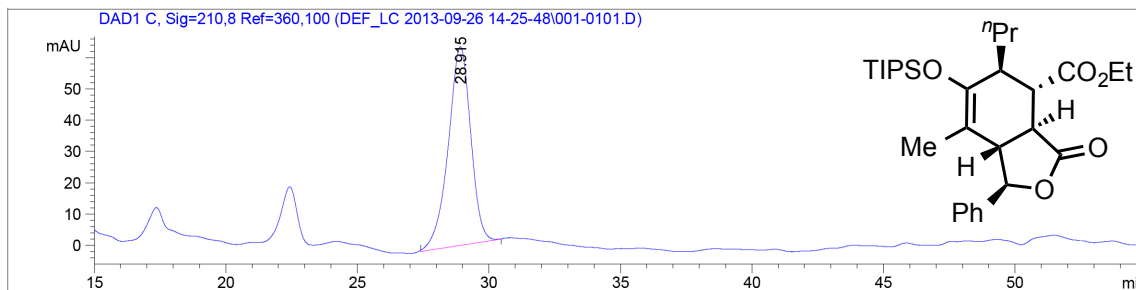

Signal 3: DAD1 C, Sig=210,8 Ref=360,100

| Peak # | RetTime [min] | Type | Width [min] | Area [mAU*s] | Height [mAU] | Area %   |
|--------|---------------|------|-------------|--------------|--------------|----------|
| 1      | 28.915        | BB   | 0.8574      | 3764.60156   | 63.51937     | 100.0000 |

Totals : 3764.60156 63.51937

## Determination of enantiomeric excess of tricyclic $\gamma$ -lactone (–)-14d:

**Chiral HPLC analysis of tricyclic  $\gamma$ -lactone (–)-14d:** Chiralcel OD-H column: hexanes:PrOH = 95:05, flow rate 0.5 mL/min,  $\lambda$  = 210 nm:  $t_{\text{minor}}$  = 11.1 min,  $t_{\text{major}}$  = 12.1 min; 99% *ee*.

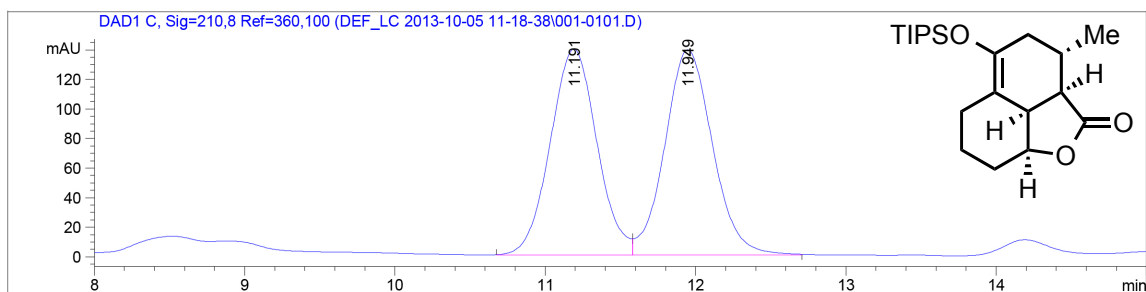

Signal 3: DAD1 C, Sig=210,8 Ref=360,100

| Peak # | RetTime [min] | Type | Width [min] | Area [mAU*s] | Height [mAU] | Area %  |
|--------|---------------|------|-------------|--------------|--------------|---------|
| 1      | 11.191        | BV   | 0.3332      | 2997.38525   | 139.20857    | 49.5180 |
| 2      | 11.949        | VB   | 0.3369      | 3055.73779   | 138.77129    | 50.4820 |

Totals : 6053.12305 277.97986

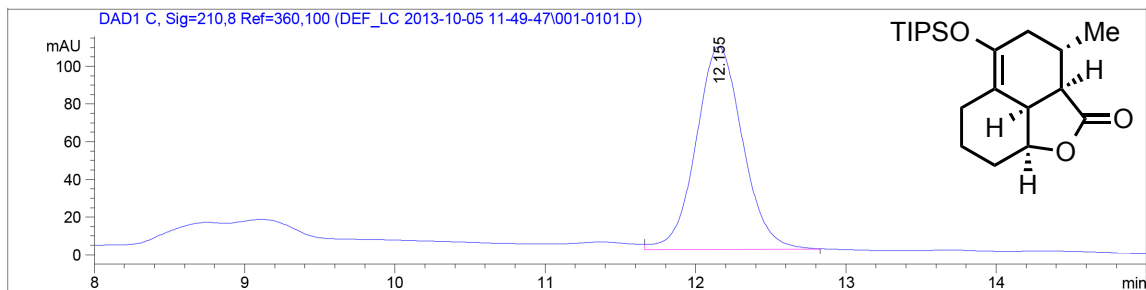

Signal 3: DAD1 C, Sig=210,8 Ref=360,100

| Peak # | RetTime [min] | Type | Width [min] | Area [mAU*s] | Height [mAU] | Area %   |
|--------|---------------|------|-------------|--------------|--------------|----------|
| 1      | 12.155        | VB   | 0.3300      | 2325.51343   | 107.66201    | 100.0000 |

Totals : 2325.51343 107.66201

## Determination of enantiomeric excess of tricyclic $\gamma$ -lactone (–)-14d’:

**Chiral HPLC analysis of tricyclic  $\gamma$ -lactone (–)-14d’:** Chiralpak IA column: hexanes:PrOH = 95:05, flow rate 0.5 mL/min,  $\lambda = 230$  nm:  $t_{\text{minor}} = 14.1$  min,  $t_{\text{major}} = 17.2$  min; 99% *ee*.

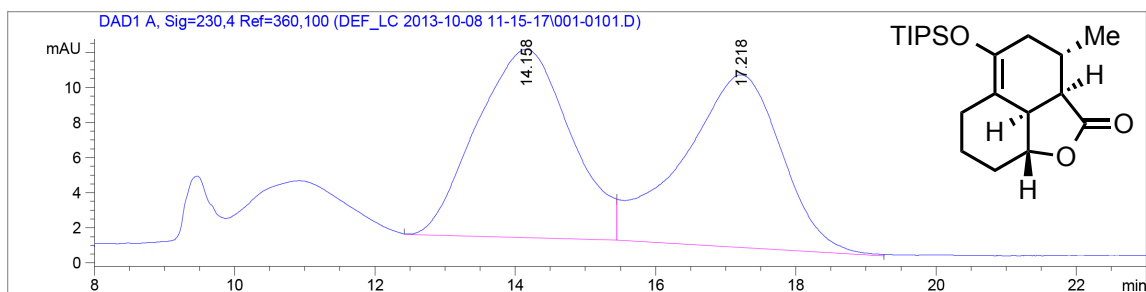

Signal 1: DAD1 A, Sig=230,4 Ref=360,100

| Peak # | RetTime [min] | Type | Width [min] | Area [mAU*s] | Height [mAU] | Area %  |
|--------|---------------|------|-------------|--------------|--------------|---------|
| 1      | 14.158        | MM   | 1.5510      | 999.61298    | 10.74140     | 51.0243 |
| 2      | 17.218        | MM   | 1.6256      | 959.47900    | 9.83724      | 48.9757 |

Totals : 1959.09198 20.57864

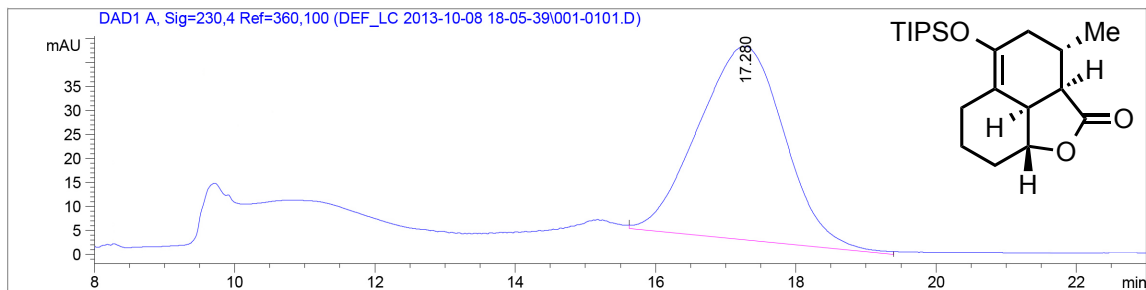

Signal 1: DAD1 A, Sig=230,4 Ref=360,100

| Peak # | RetTime [min] | Type | Width [min] | Area [mAU*s] | Height [mAU] | Area %   |
|--------|---------------|------|-------------|--------------|--------------|----------|
| 1      | 17.280        | MM   | 1.4246      | 3447.87793   | 40.33750     | 100.0000 |

Totals : 3455.97684 41.11370

**Figure S3: Determination of enantiomeric excess of bicyclic  $\gamma$ -lactones (-)-14e, (+)-14e', (+)-14e'' and (-)-14e'''**:

**Chiral HPLC analysis of bicyclic  $\gamma$ -lactone (-)-14e:** Chiralcel OD-H column: hexanes:<sup>i</sup>PrOH = 95:05, flow rate 0.5 mL/min,  $\lambda$  = 210 nm:  $t_{\text{major}}$  = 11.3 min,  $t_{\text{minor}}$  = 13.6 min; 98% *ee*.

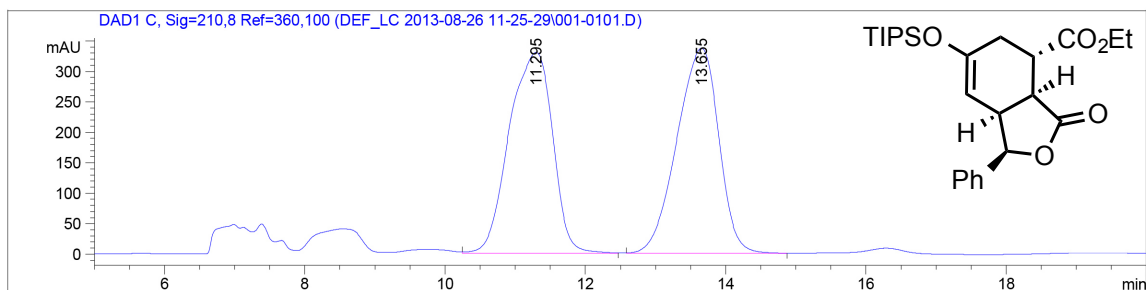

Signal 3: DAD1 C, Sig=210,8 Ref=360,100

| Peak # | RetTime [min] | Type | Width [min] | Area [mAU*s] | Height [mAU] | Area %  |
|--------|---------------|------|-------------|--------------|--------------|---------|
| 1      | 11.295        | VB   | 0.6265      | 1.42095e4    | 329.90613    | 50.4425 |
| 2      | 13.655        | BB   | 0.6656      | 1.39602e4    | 336.77118    | 49.5575 |

Totals : 2.81697e4 666.67731

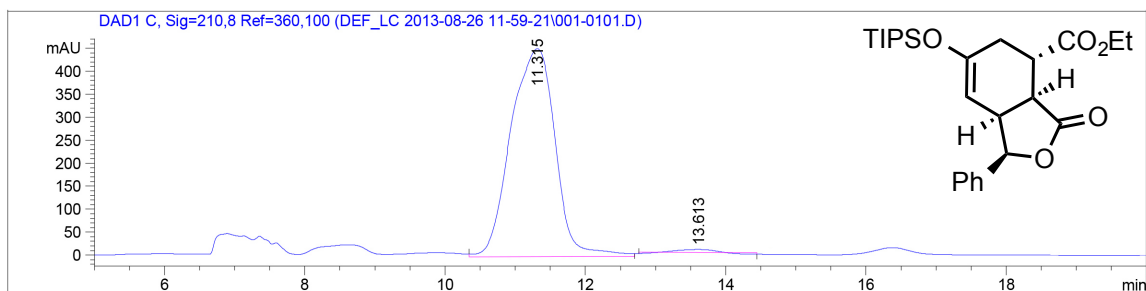

Signal 3: DAD1 C, Sig=210,8 Ref=360,100

| Peak # | RetTime [min] | Type | Width [min] | Area [mAU*s] | Height [mAU] | Area %  |
|--------|---------------|------|-------------|--------------|--------------|---------|
| 1      | 11.315        | MM   | 0.7342      | 1.99413e4    | 452.69849    | 98.9250 |
| 2      | 13.613        | MM   | 0.5690      | 216.69820    | 6.34695      | 1.0750  |

Totals : 2.01580e4 459.04544



## Determination of enantiomeric excess of bicyclic $\gamma$ -lactone (+)-14e':

**Chiral HPLC analysis of bicyclic  $\gamma$ -lactone (+)-14e'**: Chiralcel OD-H column: hexanes:PrOH = 95:05, flow rate 0.5 mL/min,  $\lambda = 210$  nm:  $t_{\text{major}} = 22.8$  min,  $t_{\text{minor}} = 34.0$  min; 99% *ee*.

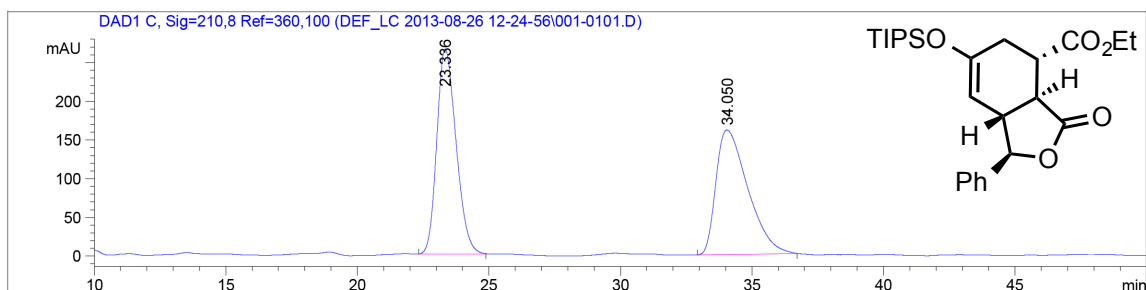

Signal 3: DAD1 C, Sig=210,8 Ref=360,100

| Peak # | RetTime [min] | Type | Width [min] | Area [mAU*s] | Height [mAU] | Area %  |
|--------|---------------|------|-------------|--------------|--------------|---------|
| 1      | 23.336        | BB   | 0.8007      | 1.34848e4    | 264.52606    | 49.8611 |
| 2      | 34.050        | BB   | 1.2792      | 1.35599e4    | 160.89601    | 50.1389 |

Totals : 2.70446e4 425.42207

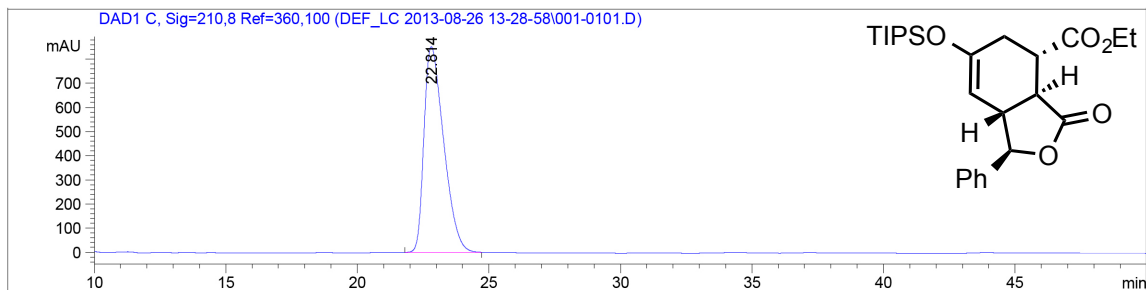

Signal 3: DAD1 C, Sig=210,8 Ref=360,100

| Peak # | RetTime [min] | Type | Width [min] | Area [mAU*s] | Height [mAU] | Area %   |
|--------|---------------|------|-------------|--------------|--------------|----------|
| 1      | 22.814        | BB   | 0.8057      | 4.43888e4    | 852.21271    | 100.0000 |

Totals : 4.43888e4 852.21271

## Determination of enantiomeric excess of bicyclic $\gamma$ -lactone (+)-14e'':

**Chiral HPLC analysis of bicyclic  $\gamma$ -lactone (+)-14e'':** Chiralcel OD-H column: hexanes:PrOH = 95:05, flow rate 0.5 mL/min,  $\lambda = 210$  nm:  $t_{\text{minor}} = 21.7$  min,  $t_{\text{major}} = 37.0$  min; 99% *ee*.

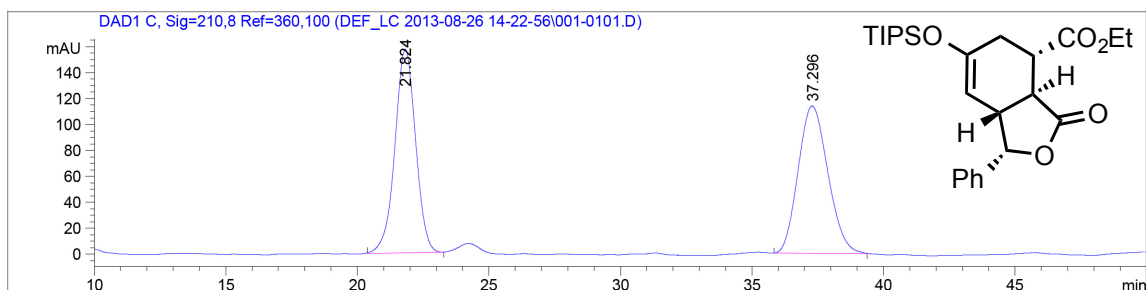

Signal 3: DAD1 C, Sig=210,8 Ref=360,100

| Peak # | RetTime [min] | Type | Width [min] | Area [mAU*s] | Height [mAU] | Area %  |
|--------|---------------|------|-------------|--------------|--------------|---------|
| 1      | 21.824        | BB   | 0.8517      | 8578.78125   | 156.95447    | 49.0045 |
| 2      | 37.296        | BB   | 1.1605      | 8927.34082   | 113.63794    | 50.9955 |

Totals : 1.75061e4 270.59241

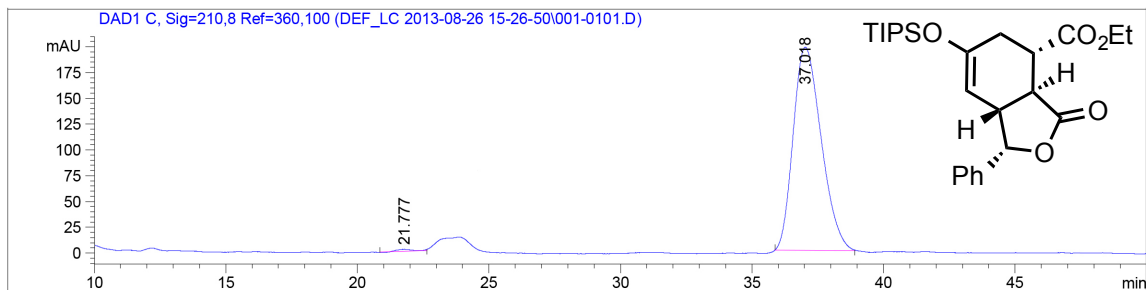

Signal 3: DAD1 C, Sig=210,8 Ref=360,100

| Peak # | RetTime [min] | Type | Width [min] | Area [mAU*s] | Height [mAU] | Area %  |
|--------|---------------|------|-------------|--------------|--------------|---------|
| 1      | 21.777        | MM   | 0.6535      | 7.68978      | 1.96131e-1   | 0.4870  |
| 2      | 37.018        | BB   | 1.0976      | 1571.21863   | 21.17800     | 99.5130 |

Totals : 1578.90841 21.37413

## Determination of enantiomeric excess of bicyclic $\gamma$ -lactone (–)-14e''':

**Chiral HPLC analysis of bicyclic  $\gamma$ -lactone (–)-14e''':** Chiralcel AS-H column: hexanes:PrOH = 95:05, flow rate 0.5 mL/min,  $\lambda = 210$  nm:  $t_{\text{major}} = 15.5$  min,  $t_{\text{minor}} = 28.2$  min; 97% *ee*.

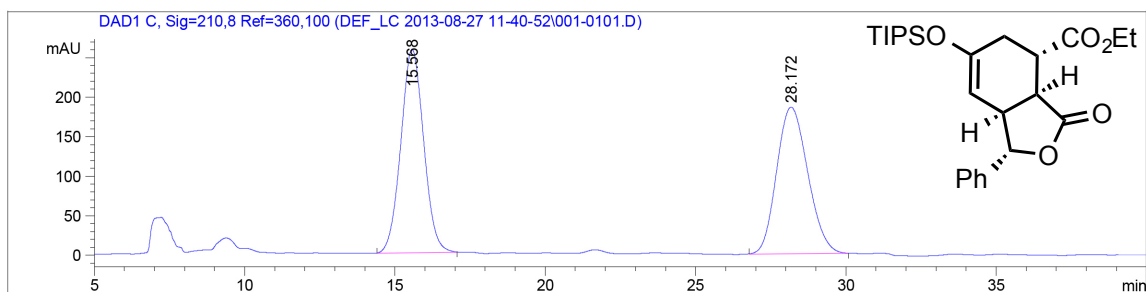

Signal 3: DAD1 C, Sig=210,8 Ref=360,100

| Peak # | RetTime [min] | Type | Width [min] | Area [mAU*s] | Height [mAU] | Area %  |
|--------|---------------|------|-------------|--------------|--------------|---------|
| 1      | 15.568        | BB   | 0.8089      | 1.35702e4    | 257.45016    | 50.4264 |
| 2      | 28.172        | BB   | 1.1175      | 1.33407e4    | 185.39282    | 49.5736 |

Totals : 2.69109e4 442.84299

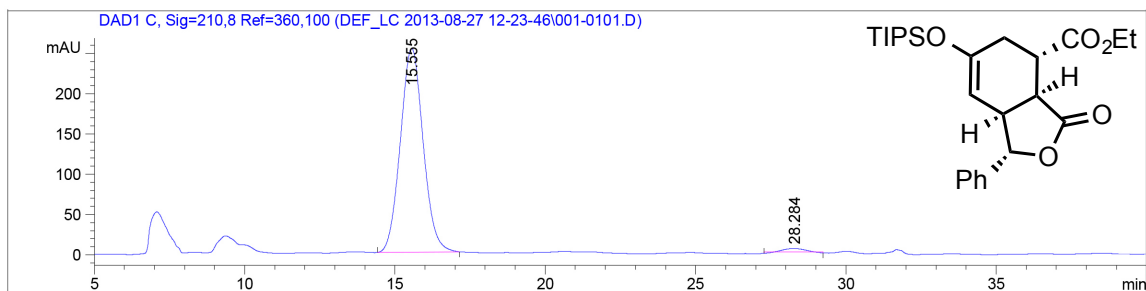

Signal 3: DAD1 C, Sig=210,8 Ref=360,100

| Peak # | RetTime [min] | Type | Width [min] | Area [mAU*s] | Height [mAU] | Area %  |
|--------|---------------|------|-------------|--------------|--------------|---------|
| 1      | 15.555        | BB   | 0.8209      | 1.33634e4    | 253.56432    | 98.3984 |
| 2      | 28.284        | MM   | 0.8160      | 217.51129    | 4.44277      | 1.6016  |

Totals : 1.35809e4 258.00708

## References:

1. D. Seebach, R. Imwinkelried and G. Stucky, *Helv. Chim. Acta.*, **1987**, *70*, 448-464.
2. M. E. Abbasov, B. M. Hudson, D. J. Tantillo and D. Romo, *J. Am. Chem. Soc.*, **2014**, *136*, 4492-4495.
3. M. T. Crimmins and J. G. Lever, *Tetrahedron Lett.*, **1986**, *27*, 291-294.
4. C. Morrill, G. L. Beutner and R. H. Grubbs, *J. Org. Chem.*, **2006**, *71*, 7813-7825.
5. Gaussian 09, Revision D.01, Frisch, M. J.; Trucks, G. W.; Schlegel, H. B.; Scuseria, G. E.; Robb, M. A.; Cheeseman, J. R.; Scalmani, G.; Barone, V.; Mennucci, B.; Petersson, G. A.; Nakatsuji, H.; Caricato, M.; Li, X.; Hratchian, H. P.; Izmaylov, A. F.; Bloino, J.; Zheng, G.; Sonnenberg, J. L.; Hada, M.; Ehara, M.; Toyota, K.; Fukuda, R.; Hasegawa, J.; Ishida, M.; Nakajima, T.; Honda, Y.; Kitao, O.; Nakai, H.; Vreven, T.; Montgomery, Jr., J. A.; Peralta, J. E.; Ogliaro, F.; Bearpark, M.; Heyd, J. J.; Brothers, E.; Kudin, K. N.; Staroverov, V. N.; Kobayashi, R.; Normand, J.; Raghavachari, K.; Rendell, A.; Burant, J. C.; Iyengar, S. S.; Tomasi, J.; Cossi, M.; Rega, N.; Millam, N. J.; Klene, M.; Knox, J. E.; Cross, J. B.; Bakken, V.; Adamo, C.; Jaramillo, J.; Gomperts, R.; Stratmann, R. E.; Yazyev, O.; Austin, A. J.; Cammi, R.; Pomelli, C.; Ochterski, J. W.; Martin, R. L.; Morokuma, K.; Zakrzewski, V. G.; Voth, G. A.; Salvador, P.; Dannenberg, J. J.; Dapprich, S.; Daniels, A. D.; Farkas, Ö.; Foresman, J. B.; Ortiz, J. V.; Cioslowski, J.; Fox, D. J. *Gaussian, Inc.*, Wallingford CT, **2009**.
6. (a) Becke, A. D. *J. Chem. Phys.* **1993**, *98*, 1372-1377. (b) Becke, A. D. *J. Chem. Phys.* **1993**, *98*, 5648-5652. (c) Lee, C.; Yang, W.; Parr, R. G. *Phys. Rev. B* **1988**, *37*, 785-789. (d) Stephens, P. J.; Devlin, F. J.; Chabalowski, C. F.; Frisch, M. J. *J. Phys. Chem.* **1994**, *98*, 11623-11627. (e) Tirado-Rives, J.; Jorgensen, W. L. *J. Chem. Theory Comput.* **2008**, *4*, 297-306. (f) Grimme, S.; Antony, J.; Ehrlich, S.; Krieg, H. *J. Chem. Phys.* **2010**, *132*, 154104.
7. Chai, J.-D.; Head-Gordon, M. *Phys. Chem. Chem. Phys.* **2008**, *10*, 6615-6620.
8. Zhao, Y.; Truhlar, D. G. *Theor. Chem. Acc.* **2008**, *120*, 215-241.

**Stereodivergent, Diels-Alder-Initiated Organocascades Employing  
 $\alpha,\beta$ -Unsaturated Acylammonium Salts: Scope, Mechanism, and Application**

Mikail E. Abbasov,<sup>†</sup> Brandi M. Hudson,<sup>‡</sup> Dean J. Tantillo<sup>‡,\*</sup> and Daniel Romo<sup>†,\*</sup>

<sup>†</sup>*Department of Chemistry and Biochemistry, Baylor University, One Bear Place 97348,  
Waco, Texas 76798, United States*

<sup>‡</sup>*Department of Chemistry, University of California–Davis, One Shields Avenue, Davis,  
California 95616, United States*

**Table of Contents, cont.**

- <sup>1</sup>H and <sup>13</sup>C NMR spectra of new compounds.....S2–S26

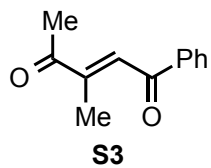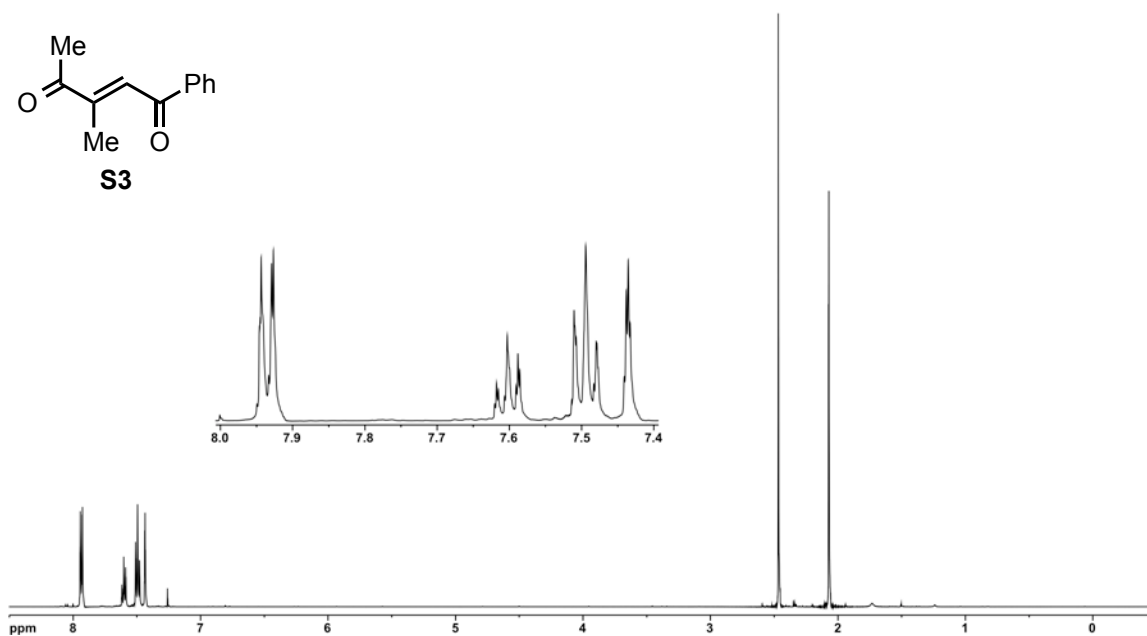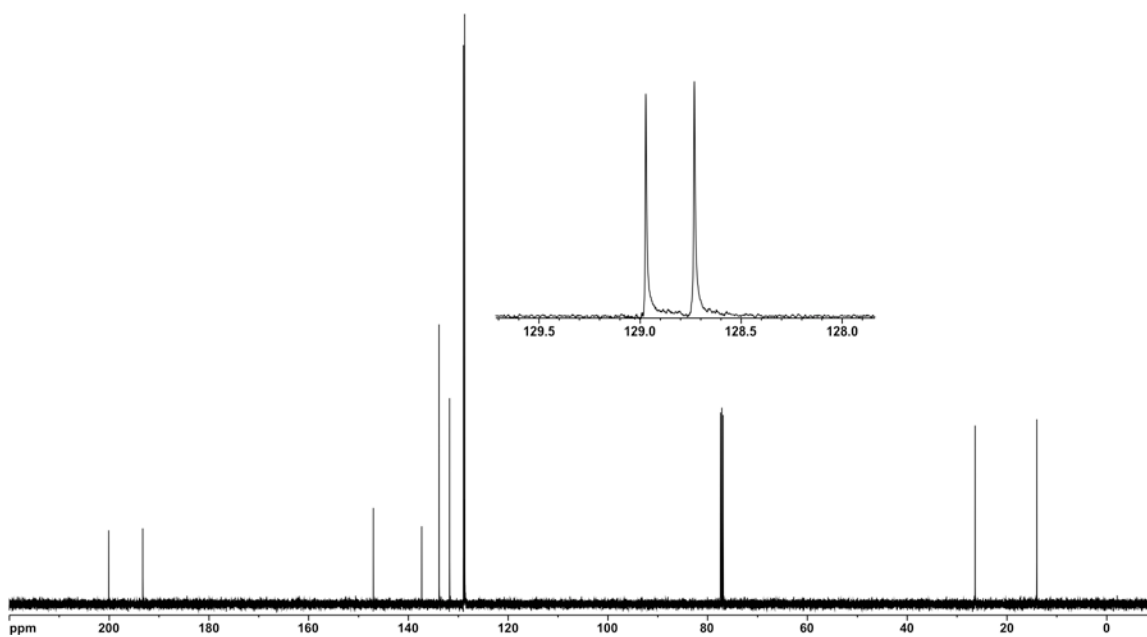

$^1\text{H}$  (500 MHz) and  $^{13}\text{C}$  NMR (125 MHz) spectra of diketone **S3** in  $\text{CDCl}_3$

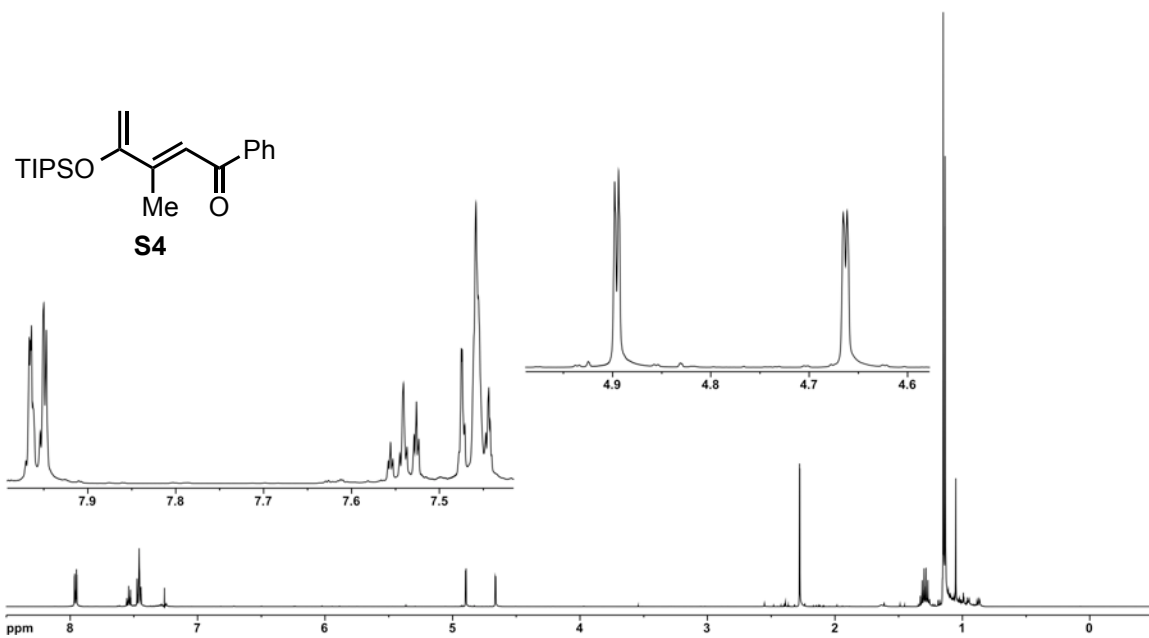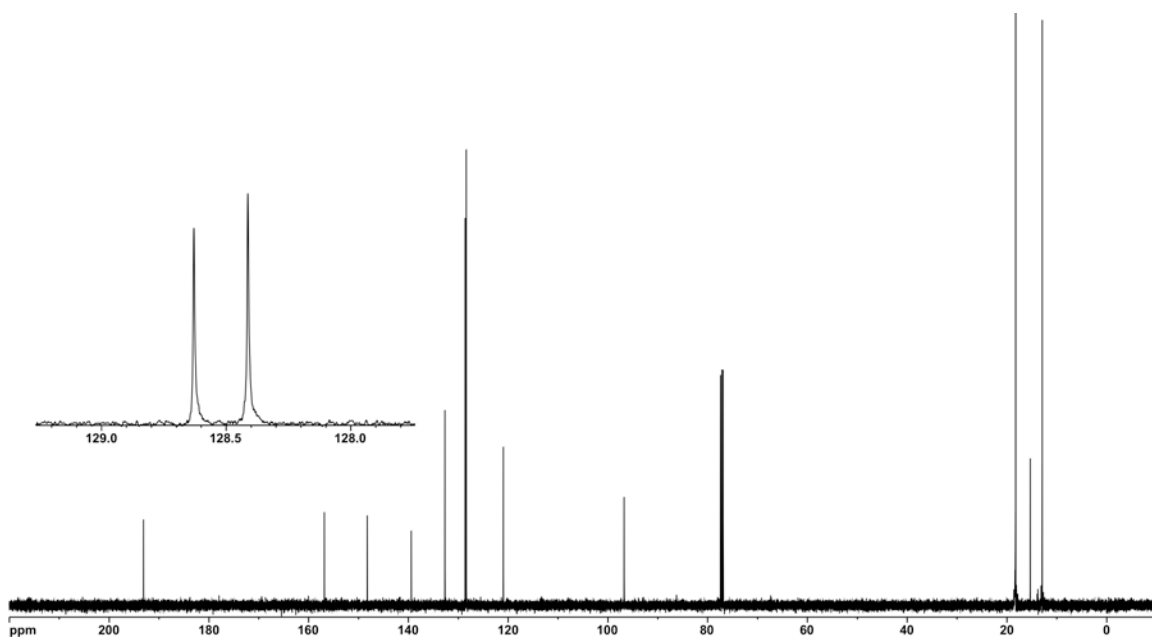

$^1\text{H}$  (500 MHz) and  $^{13}\text{C}$  NMR (125 MHz) spectra of diene **S4** in  $\text{CDCl}_3$

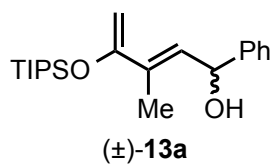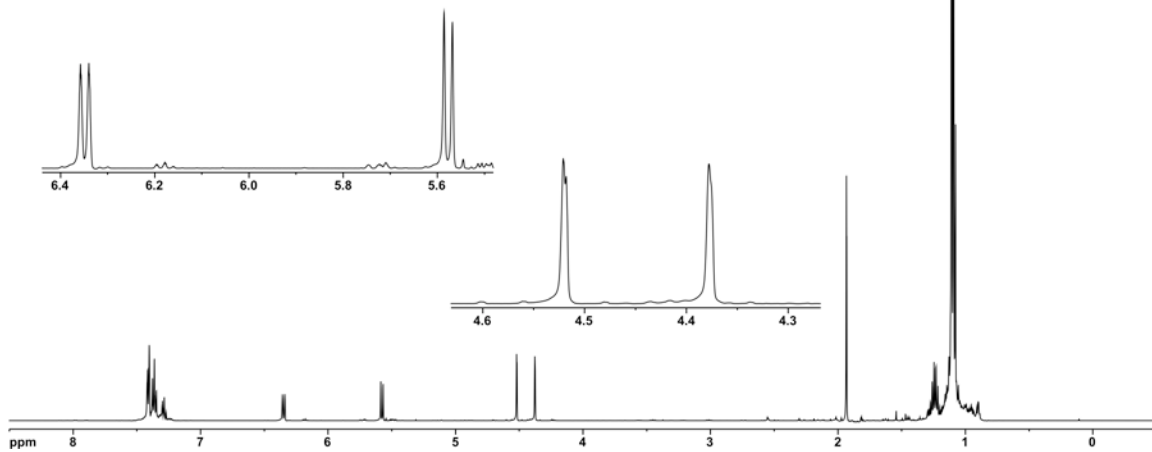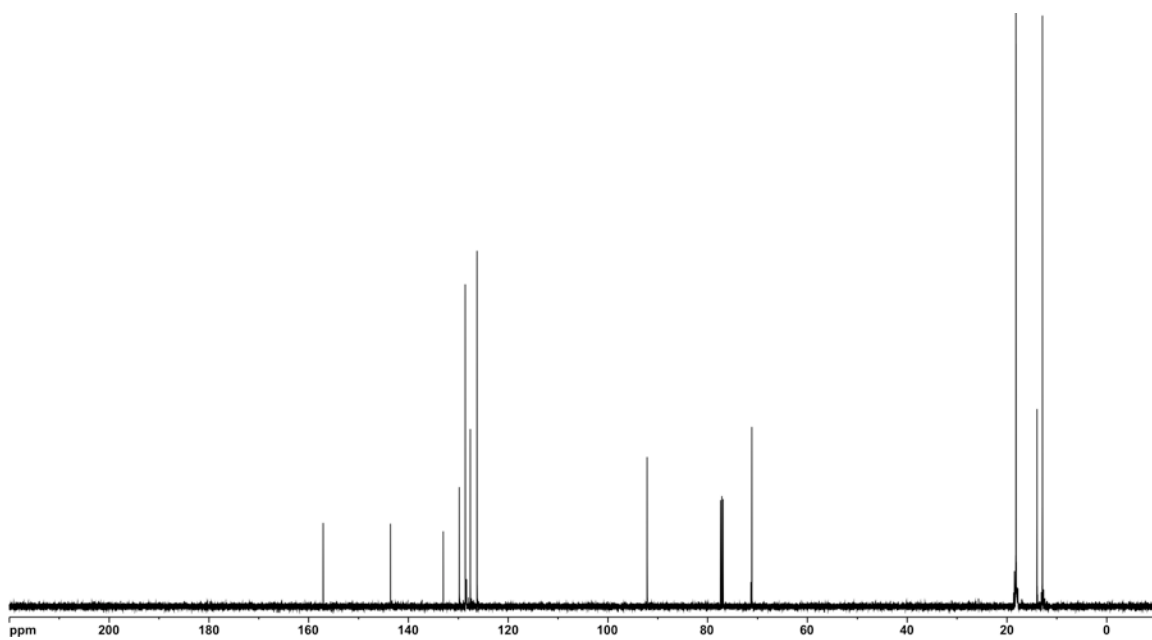

$^1\text{H}$  (500 MHz) and  $^{13}\text{C}$  NMR (125 MHz) spectra of silyloxydiene alcohol (±)-**13a** in  $\text{CDCl}_3$



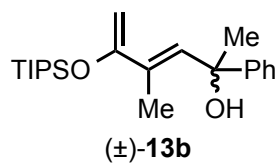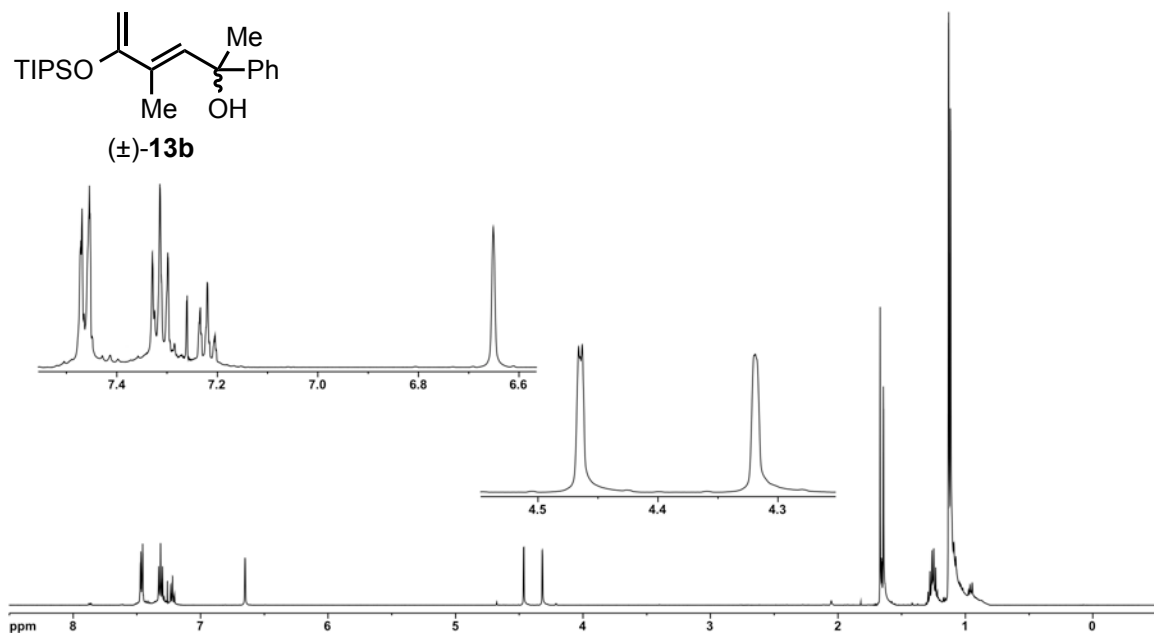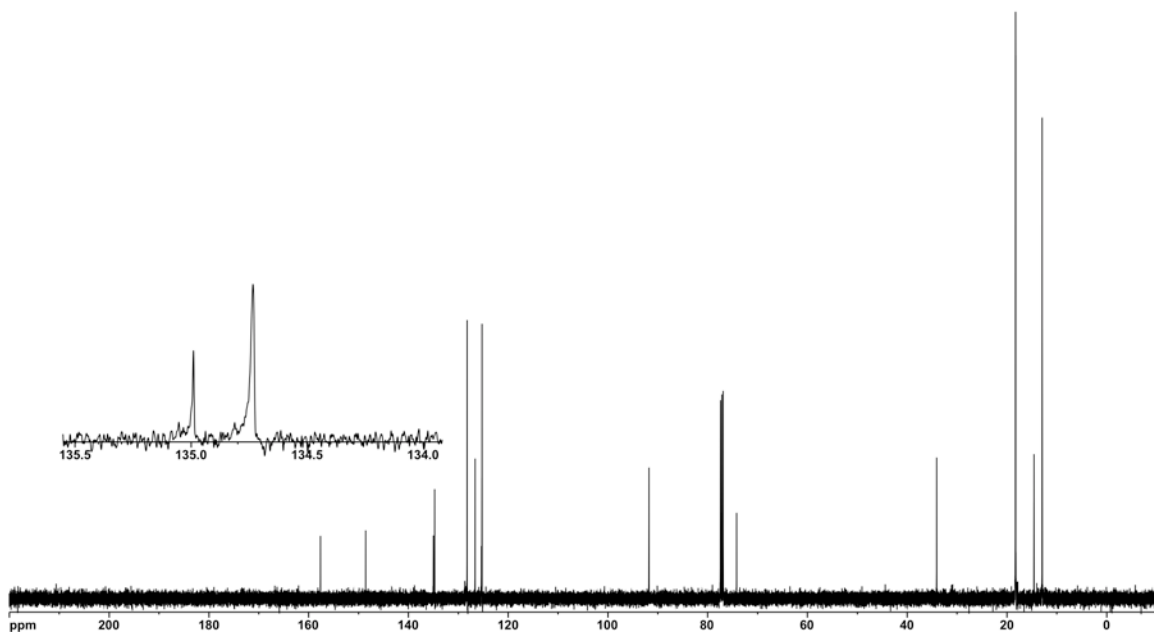

$^1\text{H}$  (500 MHz) and  $^{13}\text{C}$  NMR (125 MHz) spectra of silyloxydiene alcohol (±)-**13b** in  $\text{CDCl}_3$

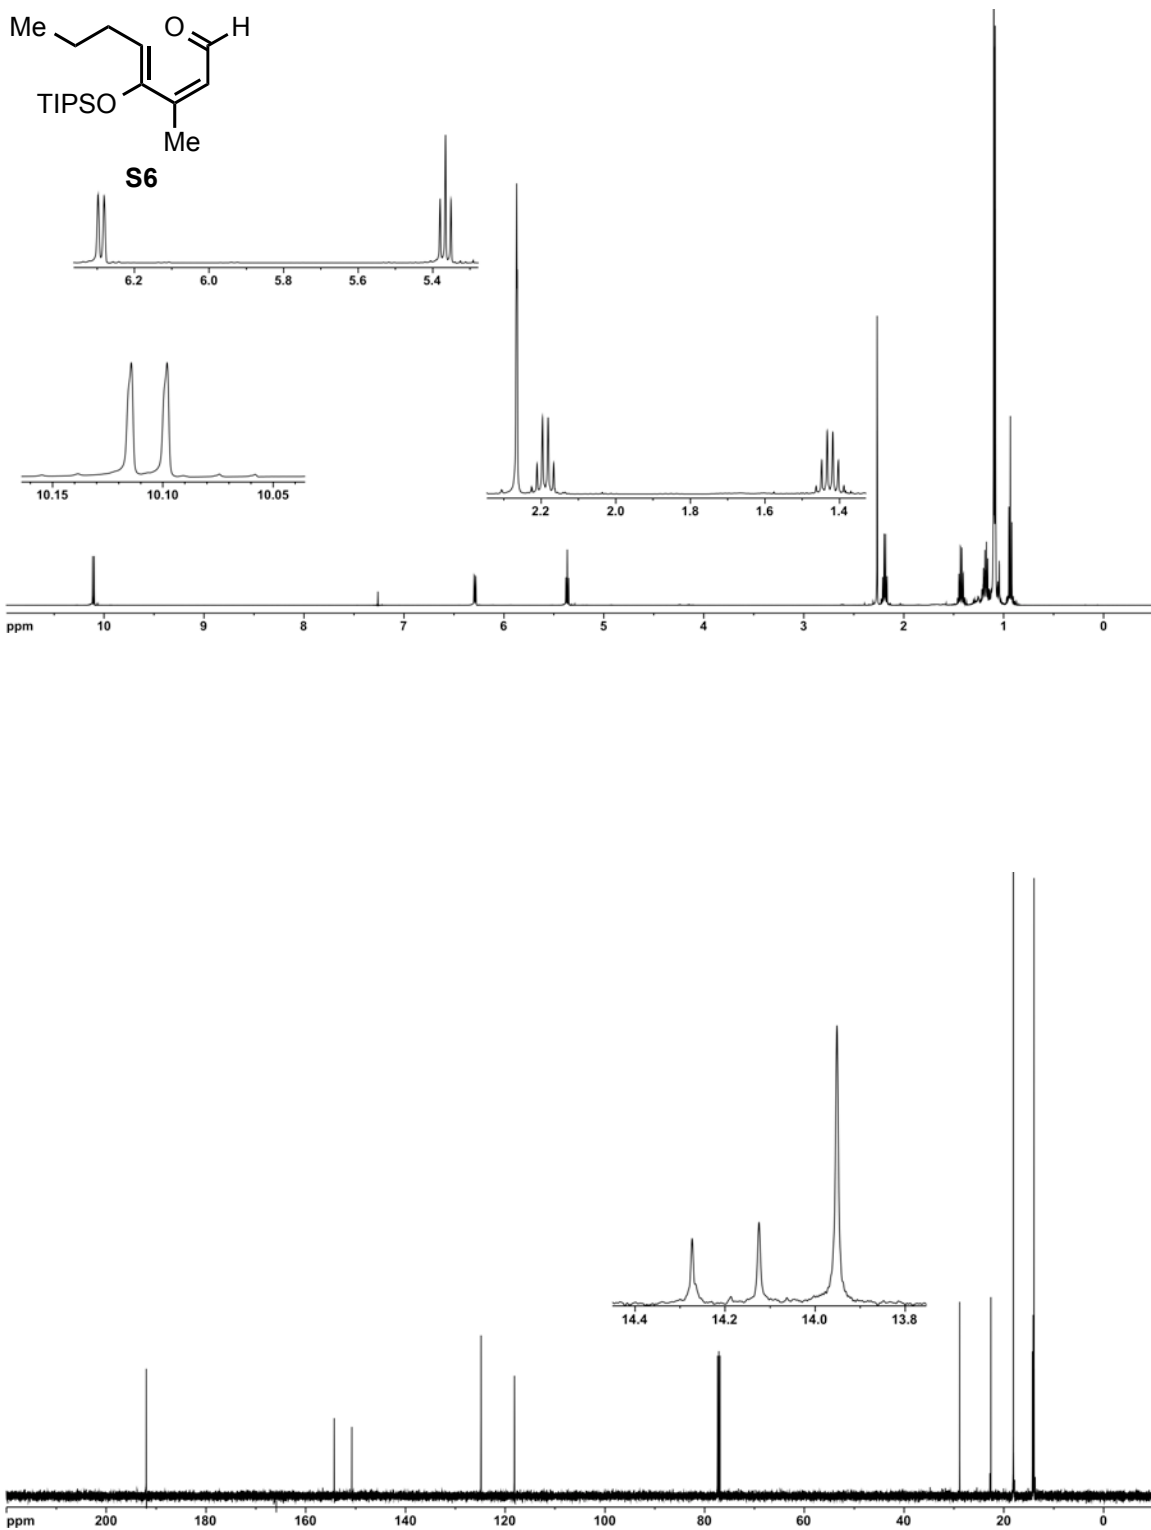

$^1\text{H}$  (500 MHz) and  $^{13}\text{C}$  NMR (125 MHz) spectra of aldehyde **S6** in  $\text{CDCl}_3$

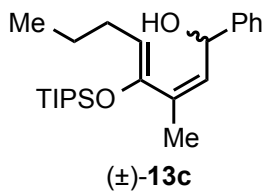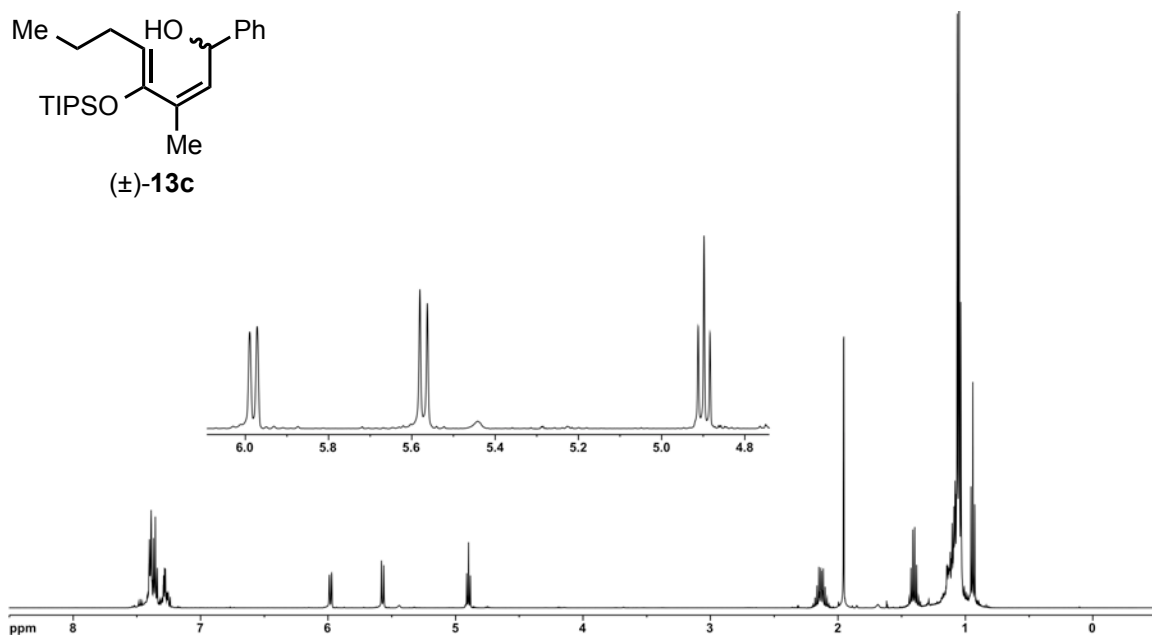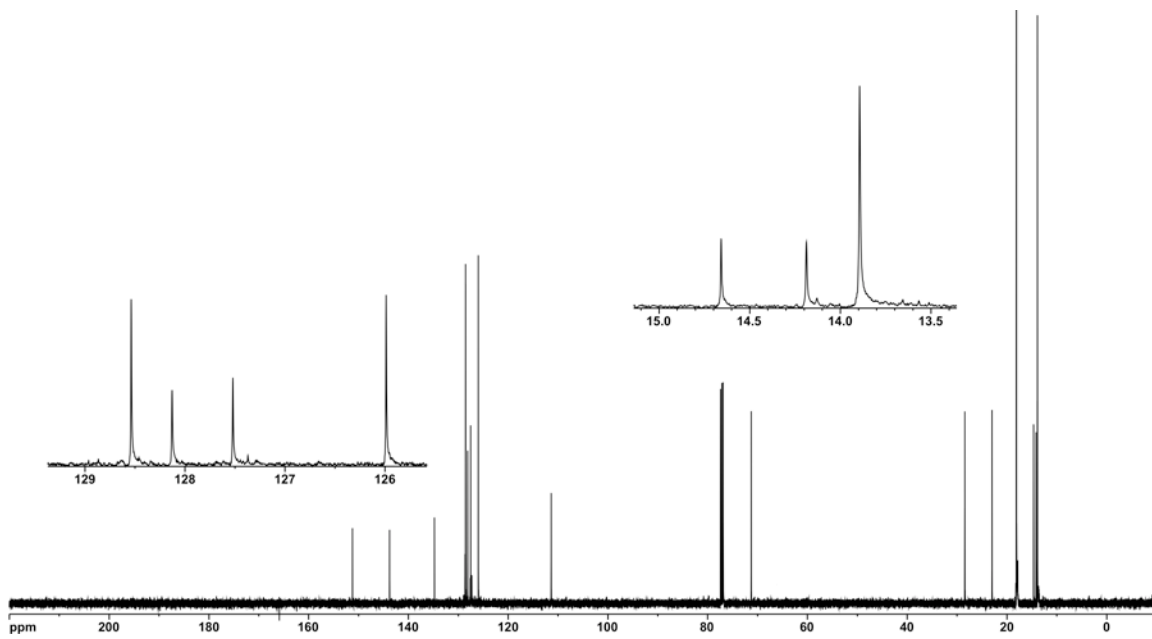

<sup>1</sup>H (500 MHz) and <sup>13</sup>C NMR (125 MHz) spectra of silyloxydiene alcohol (±)-**13c** in CDCl<sub>3</sub>

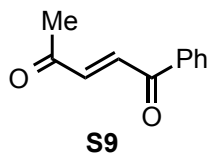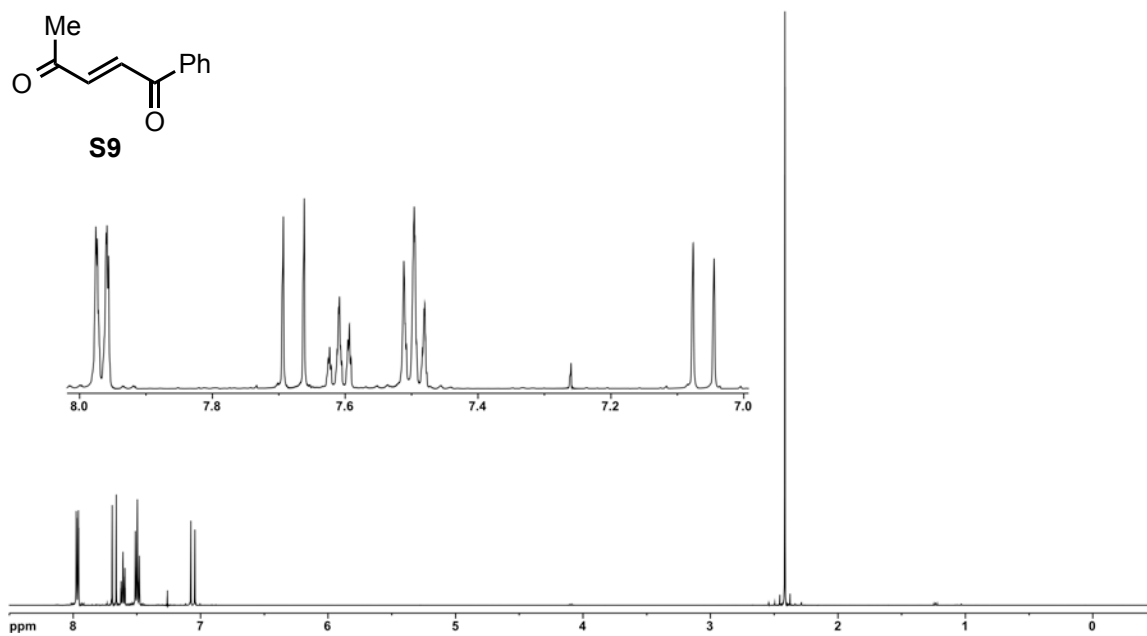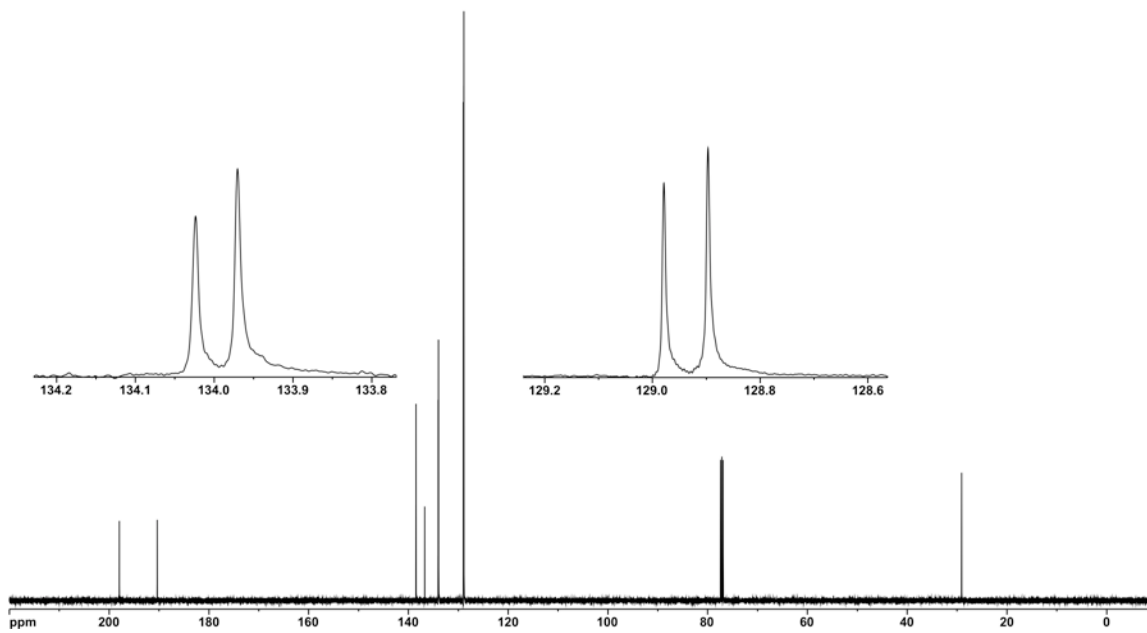

$^1\text{H}$  (500 MHz) and  $^{13}\text{C}$  NMR (125 MHz) spectra of diketone **S9** in  $\text{CDCl}_3$

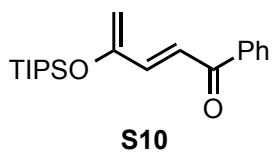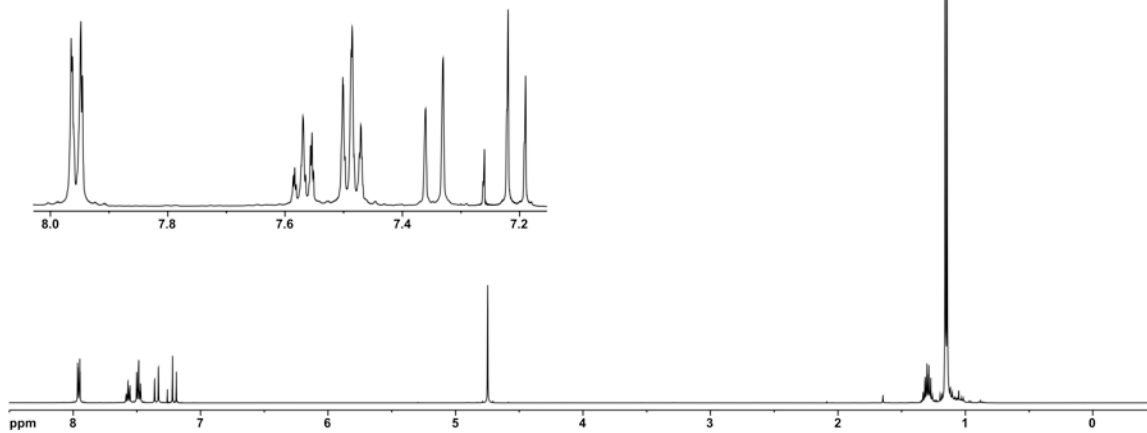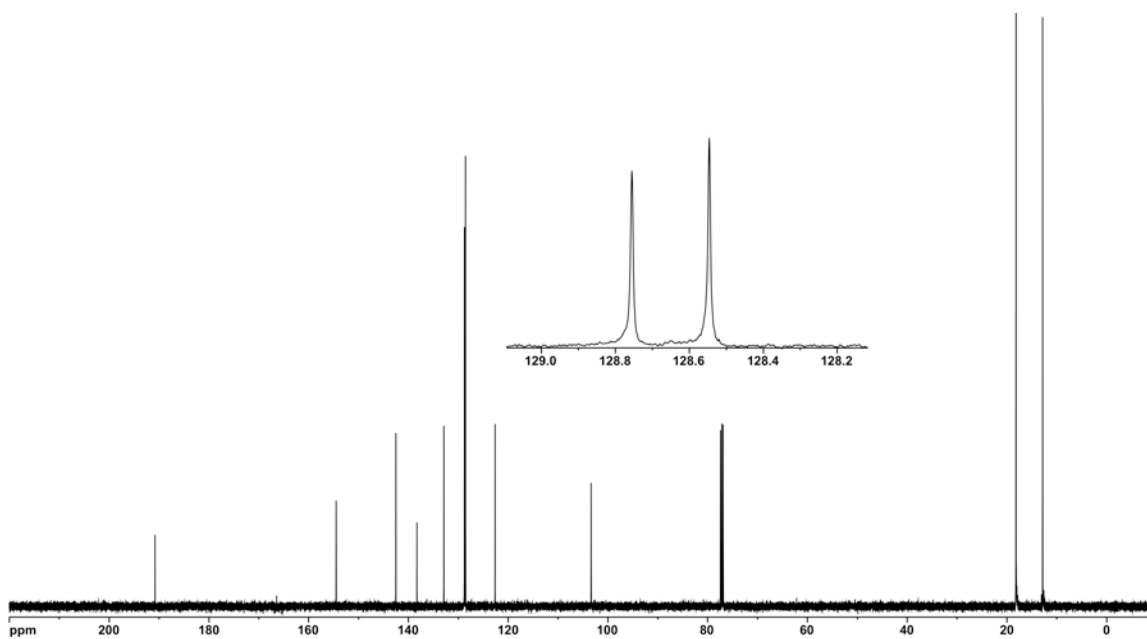

$^1\text{H}$  (500 MHz) and  $^{13}\text{C}$  NMR (125 MHz) spectra of diene **S10** in  $\text{CDCl}_3$

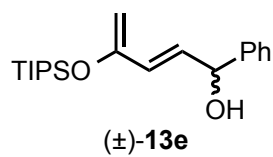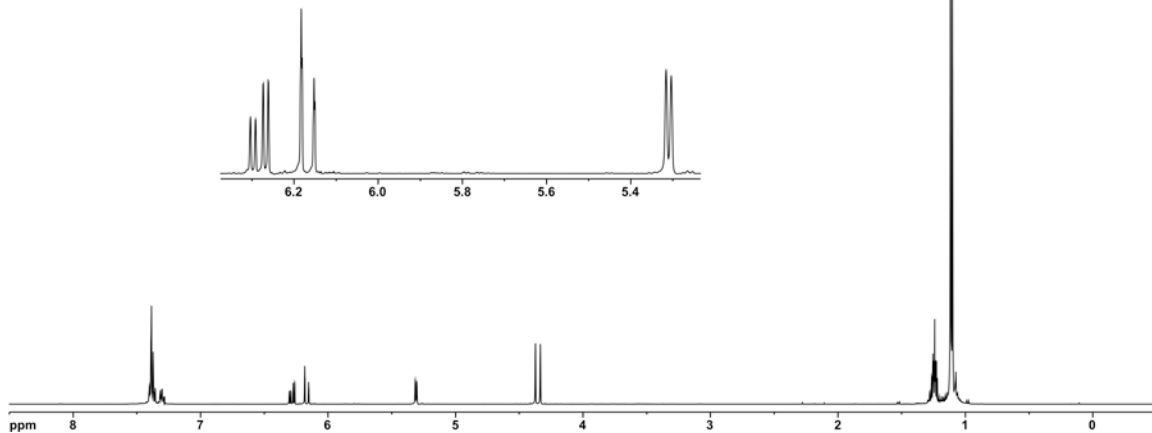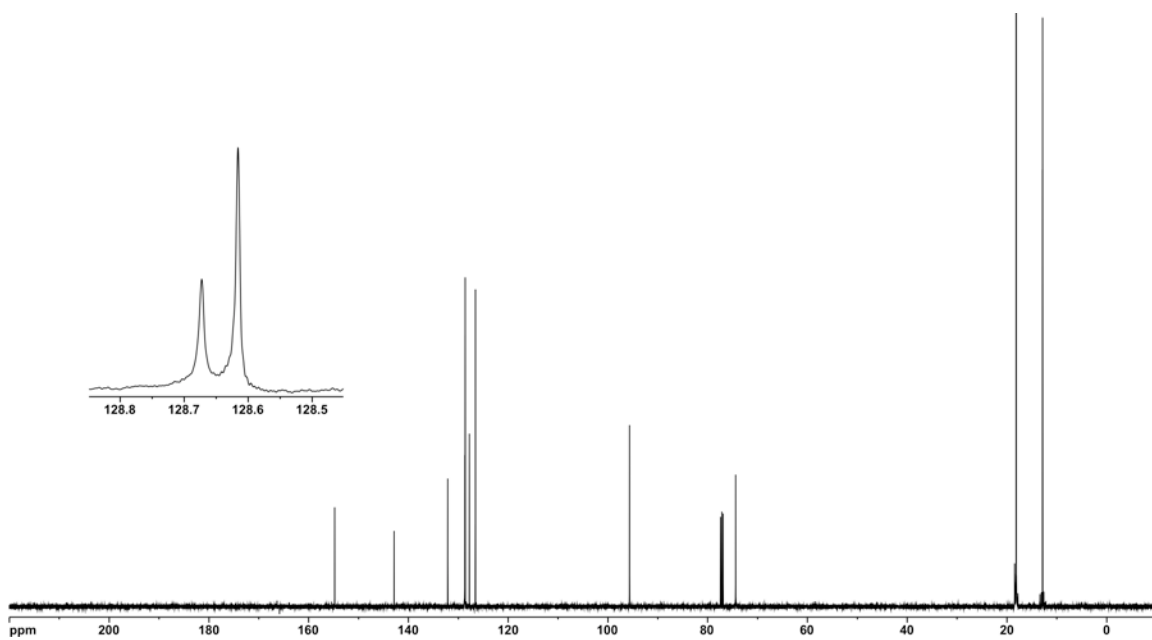

$^1\text{H}$  (500 MHz) and  $^{13}\text{C}$  NMR (125 MHz) spectra of silyloxydiene alcohol (±)-**13e** in  $\text{CDCl}_3$

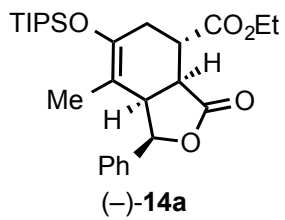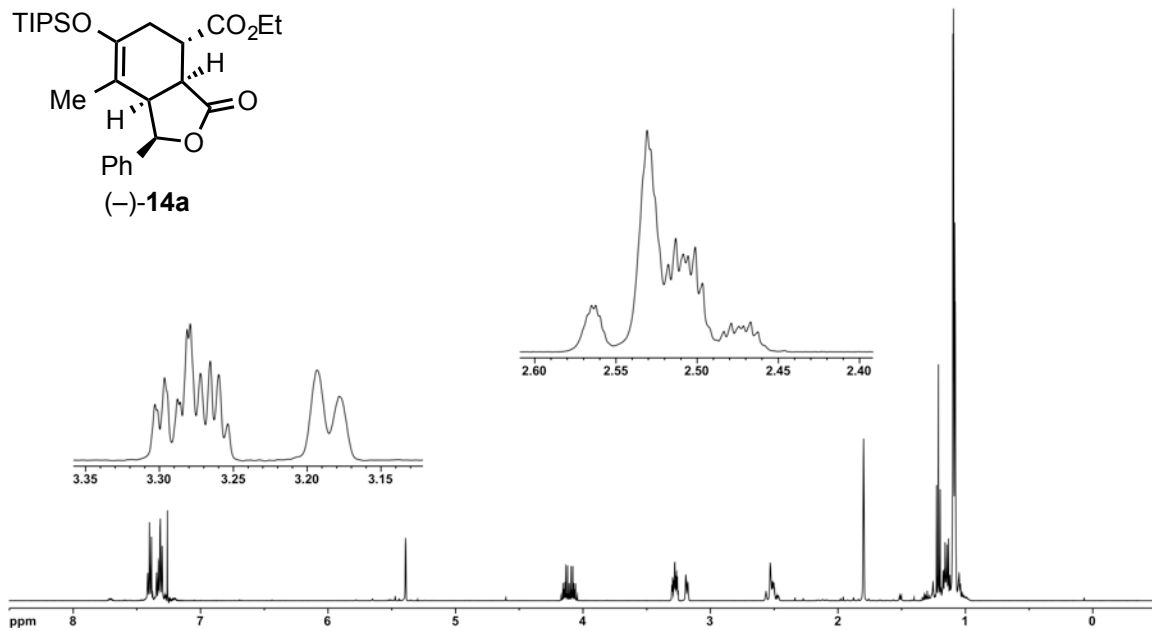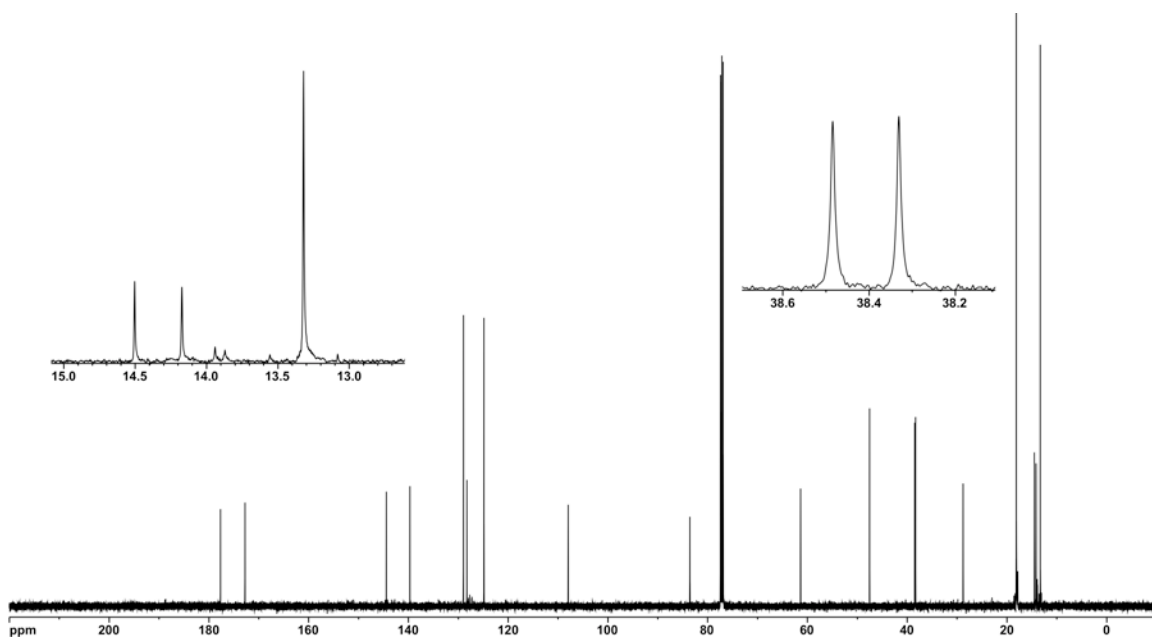

$^1\text{H}$  (500 MHz) and  $^{13}\text{C}$  NMR (125 MHz) spectra of bicyclic  $\gamma$ -lactone (-)-**14a** in  $\text{CDCl}_3$

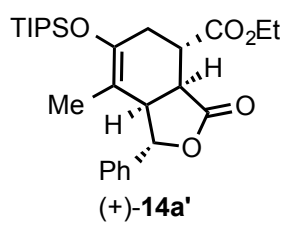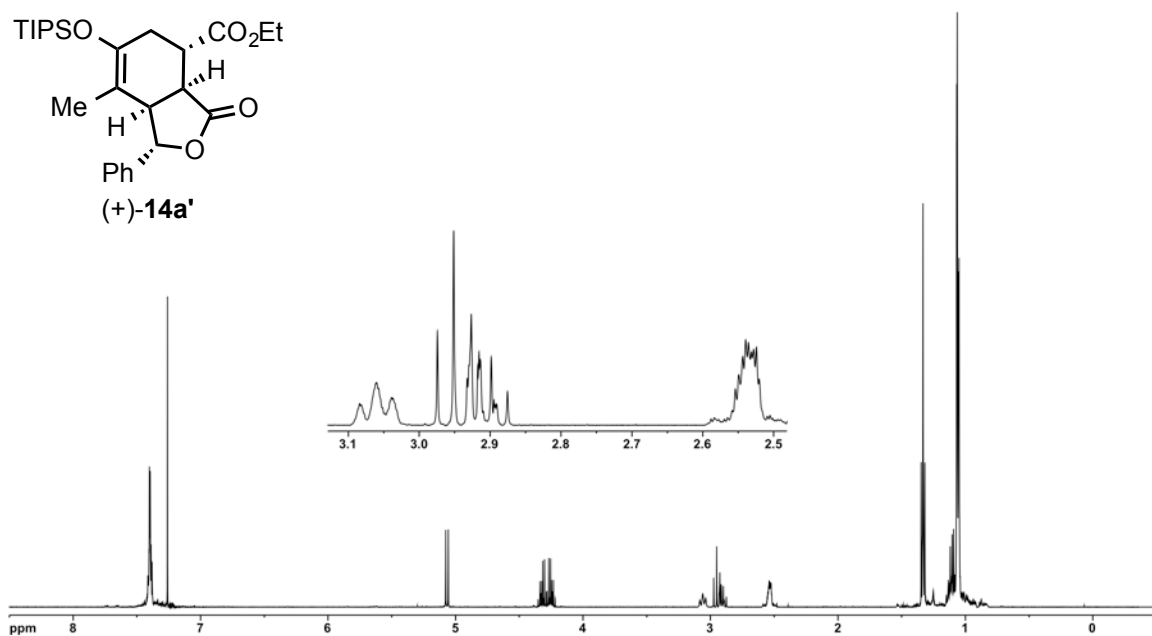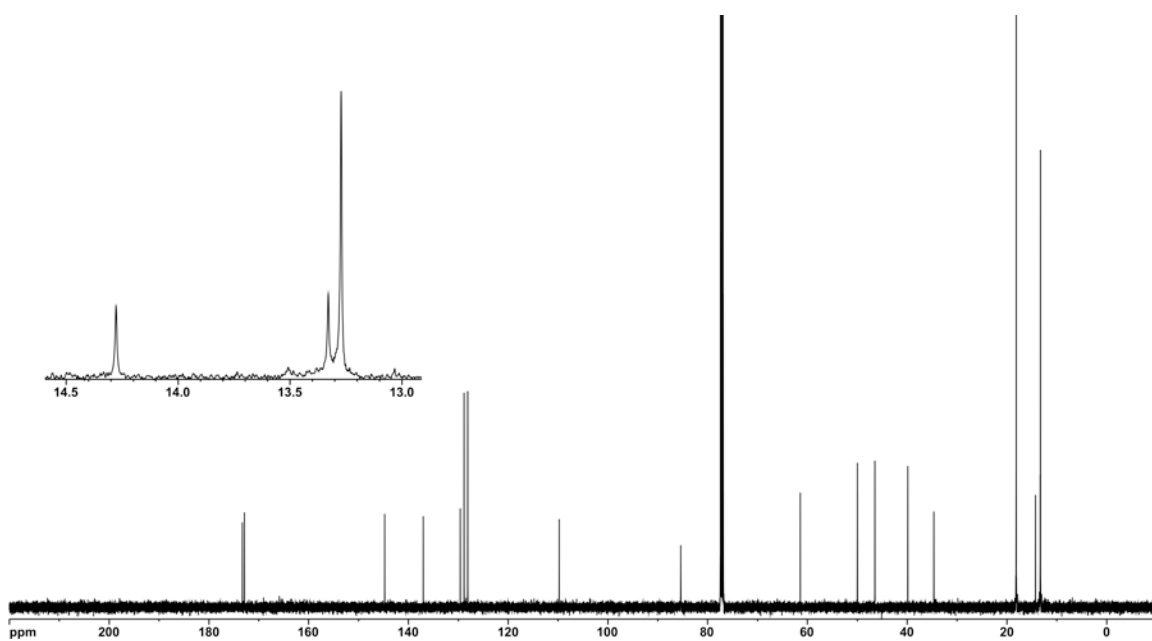

$^1\text{H}$  (500 MHz) and  $^{13}\text{C}$  NMR (125 MHz) spectra of bicyclic  $\gamma$ -lactone (+)-**14a'** in  $\text{CDCl}_3$



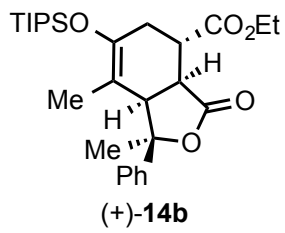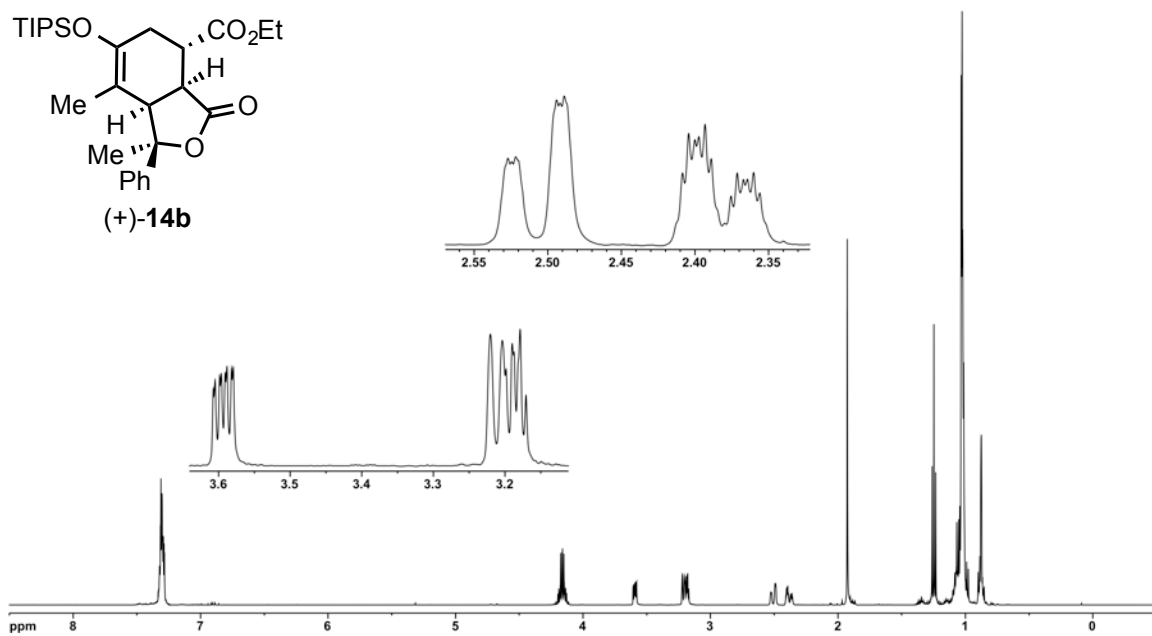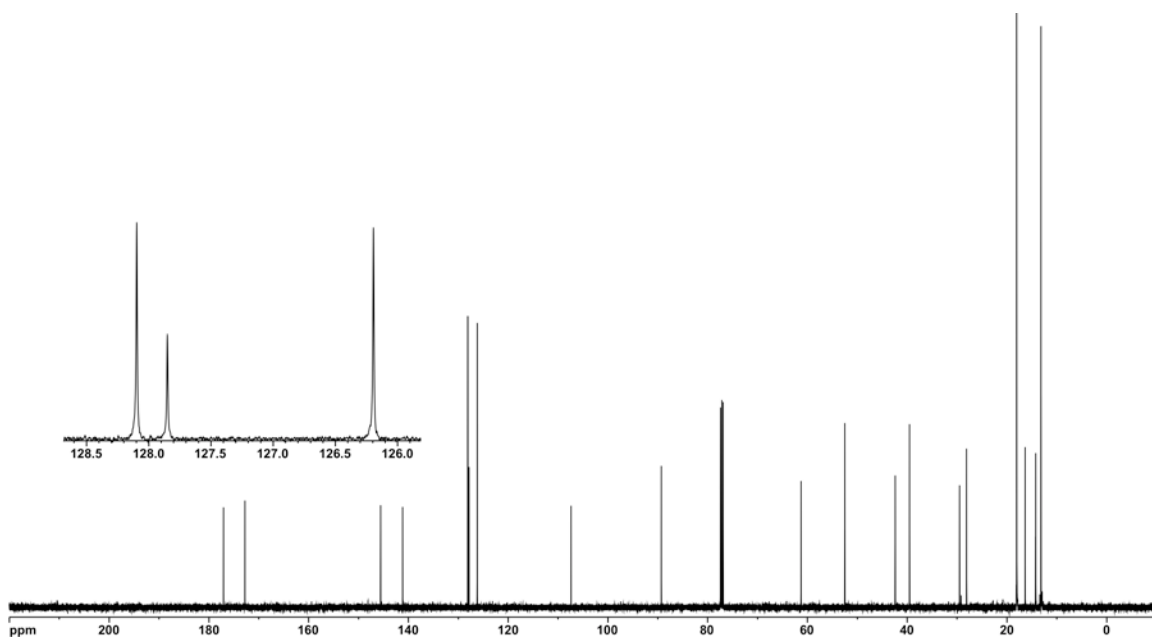

$^1\text{H}$  (500 MHz) and  $^{13}\text{C}$  NMR (125 MHz) spectra of bicyclic  $\gamma$ -lactone (+)-**14b** in  $\text{CDCl}_3$

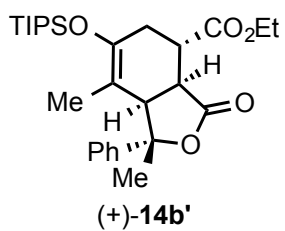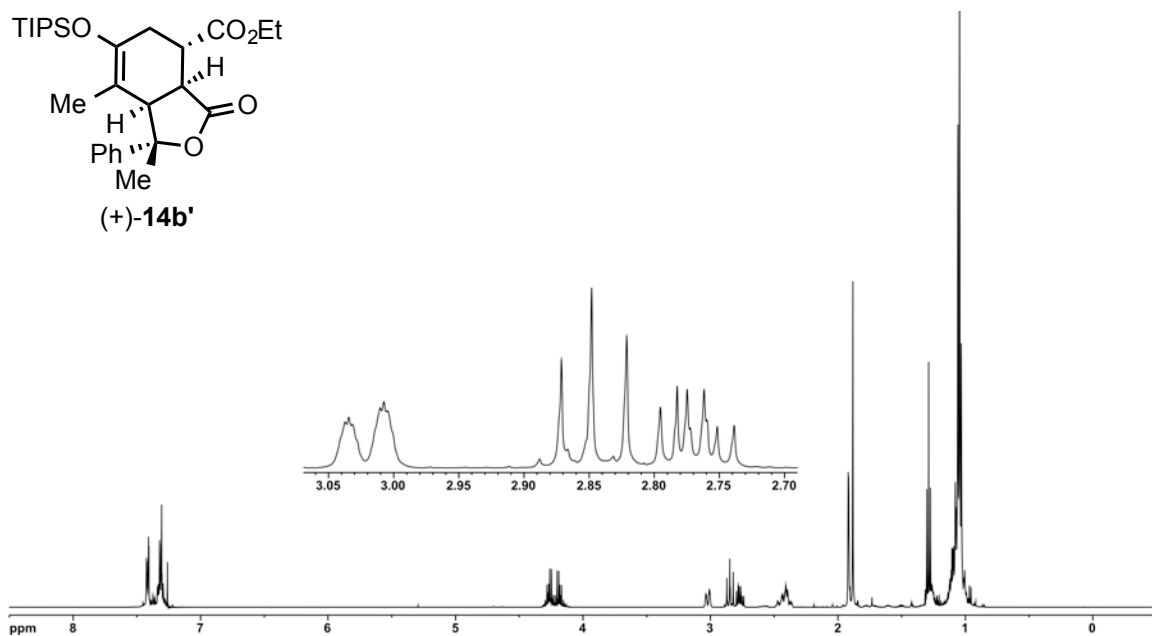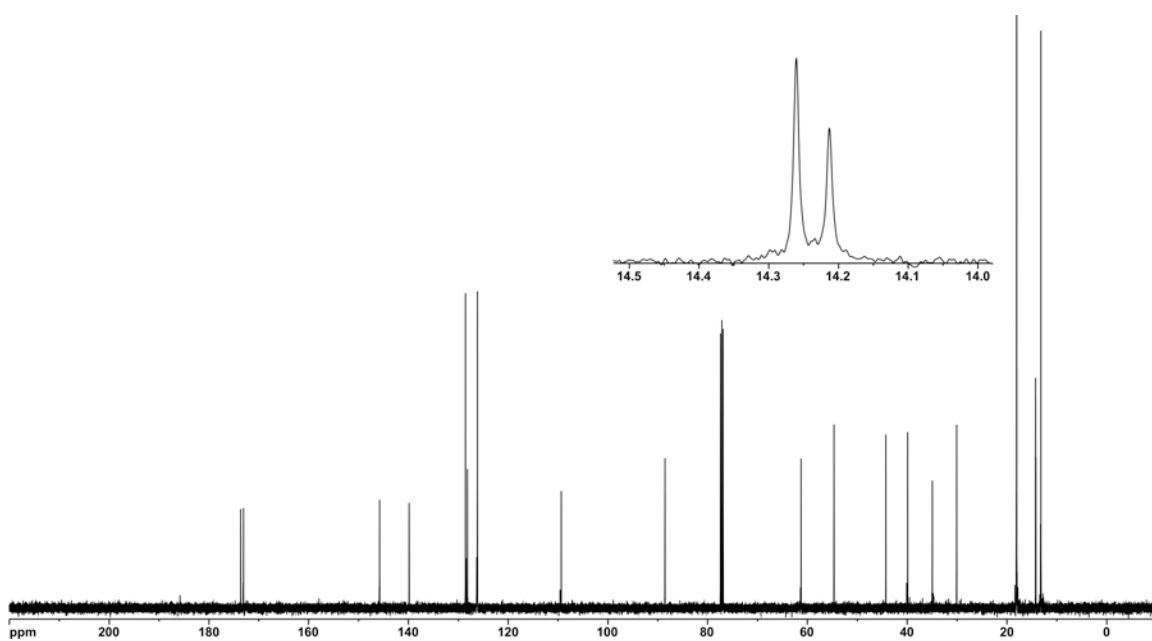

$^1\text{H}$  (500 MHz) and  $^{13}\text{C}$  NMR (125 MHz) spectra of bicyclic  $\gamma$ -lactone (+)-**14b'** in  $\text{CDCl}_3$

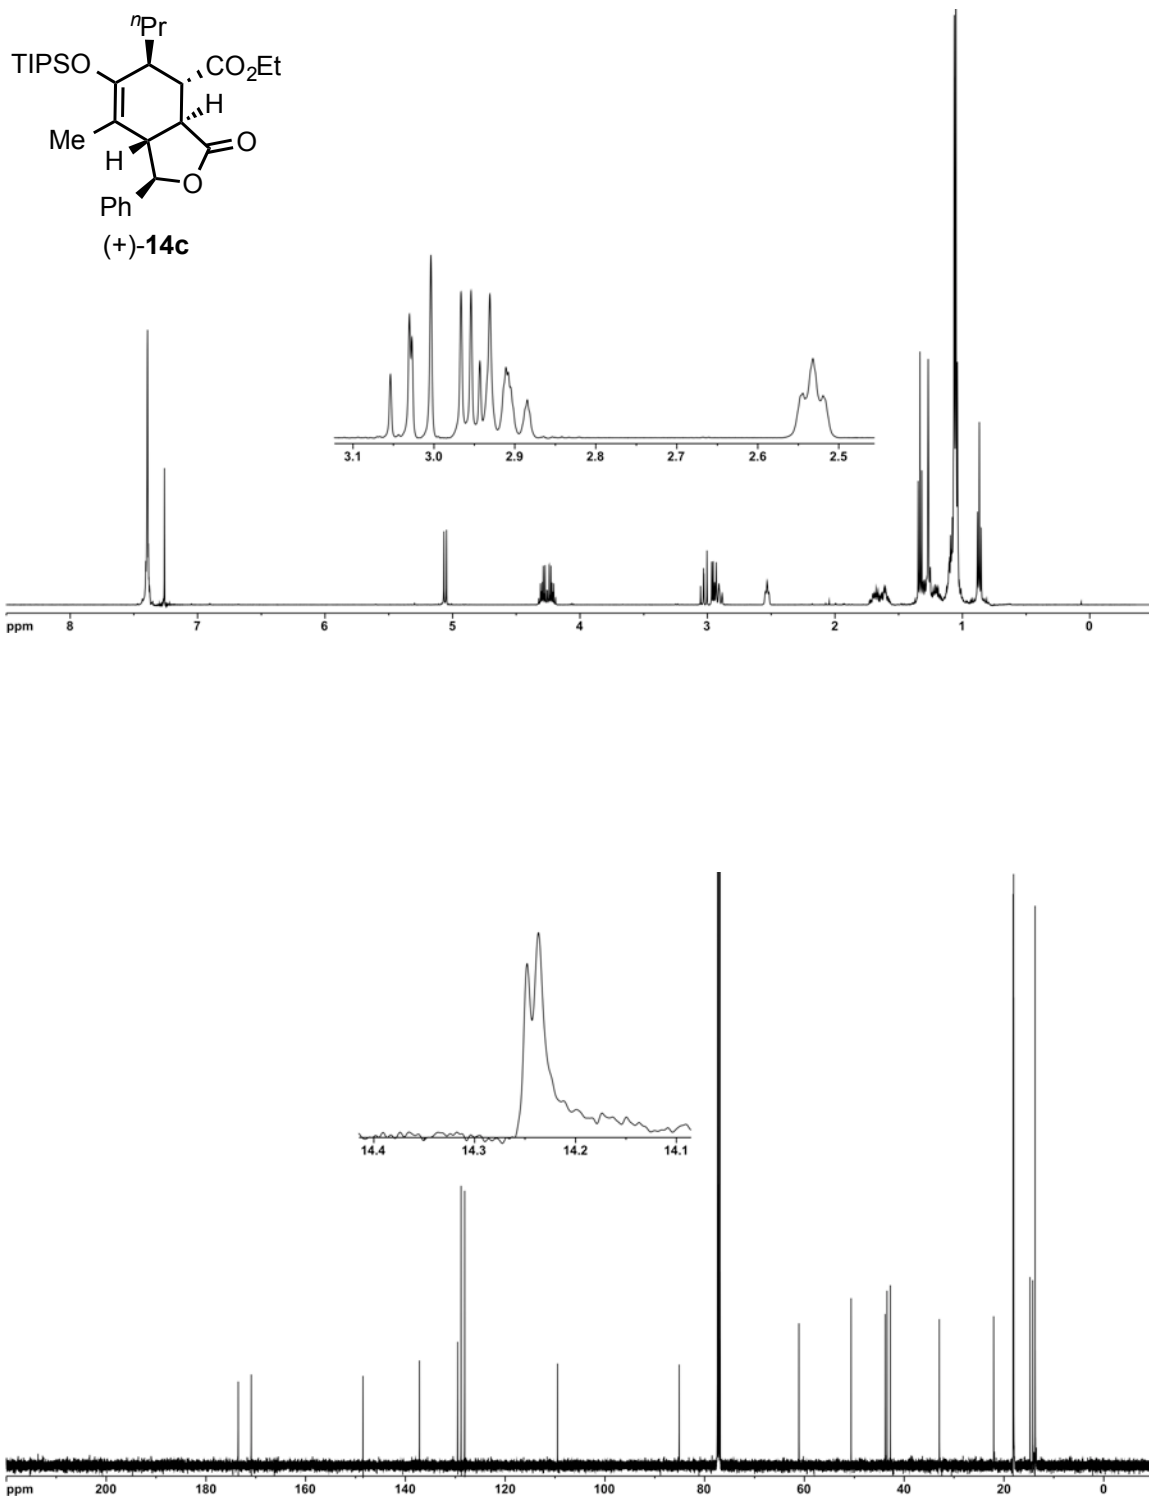

$^1\text{H}$  (500 MHz) and  $^{13}\text{C}$  NMR (125 MHz) spectra of bicyclic  $\gamma$ -lactone (+)-**14c** in  $\text{CDCl}_3$

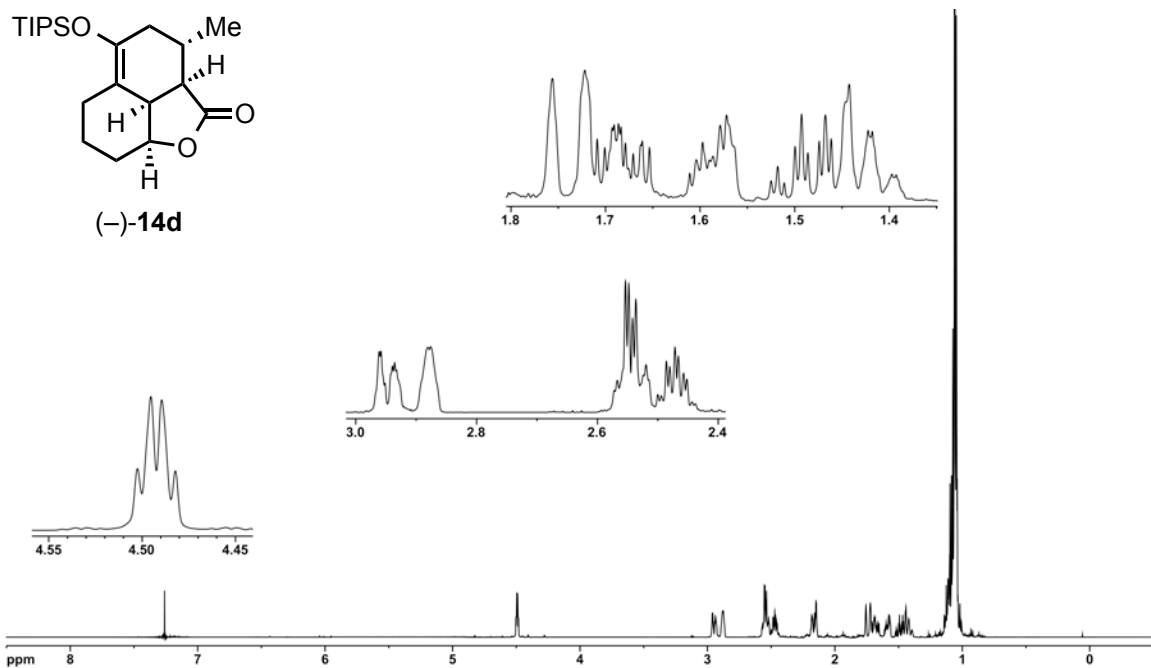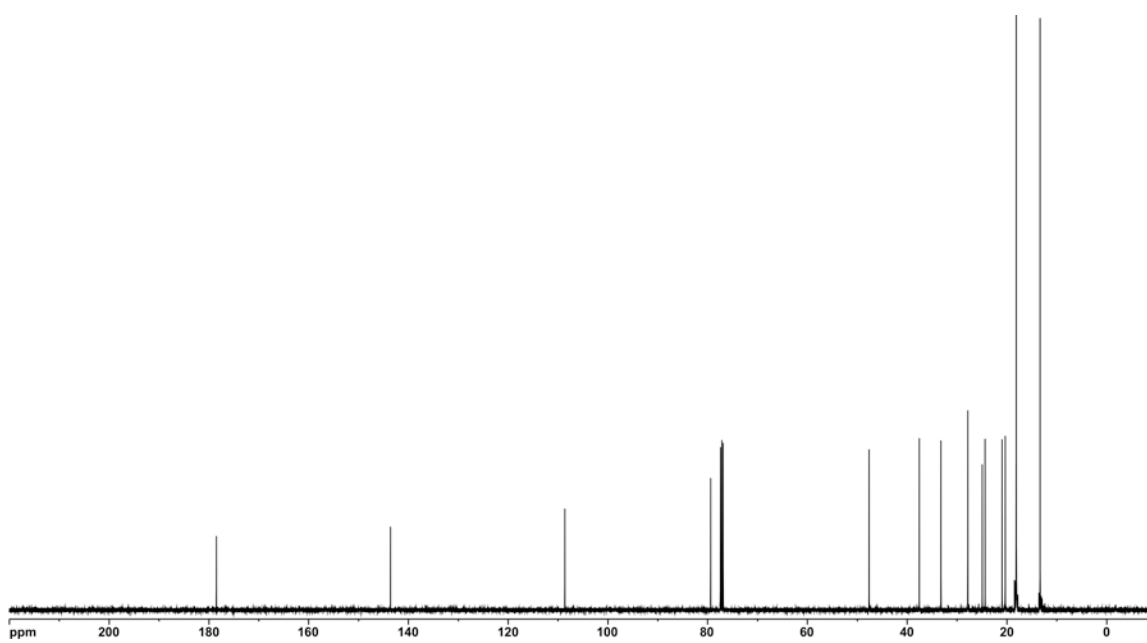

$^1\text{H}$  (500 MHz) and  $^{13}\text{C}$  NMR (125 MHz) spectra of tricyclic  $\gamma$ -lactone **(-)-14d** in  $\text{CDCl}_3$

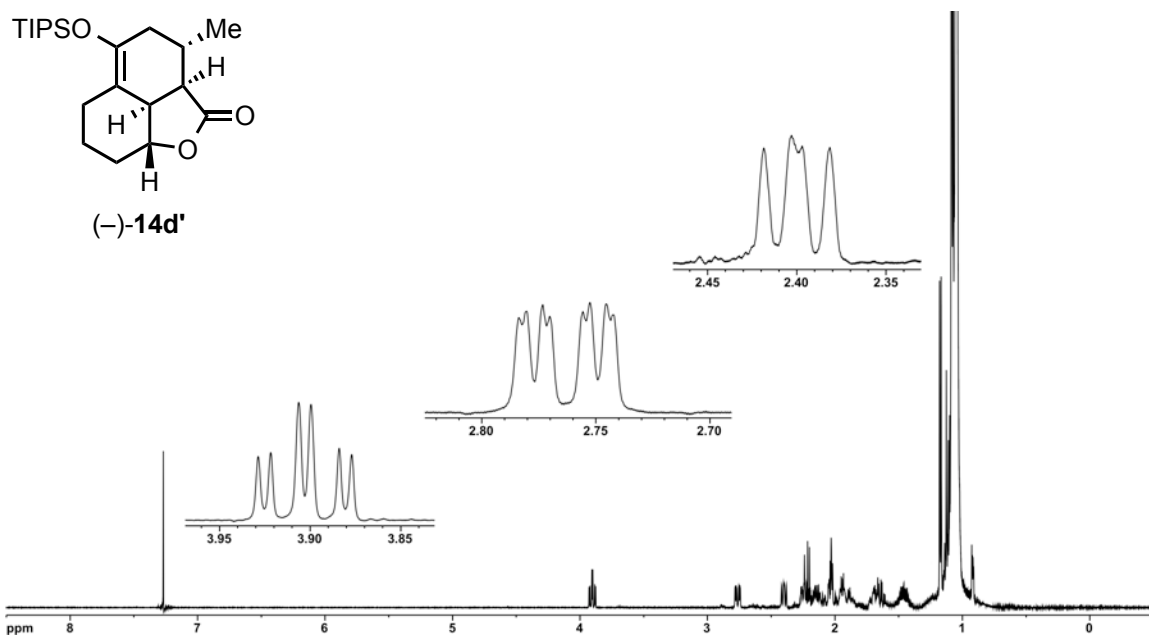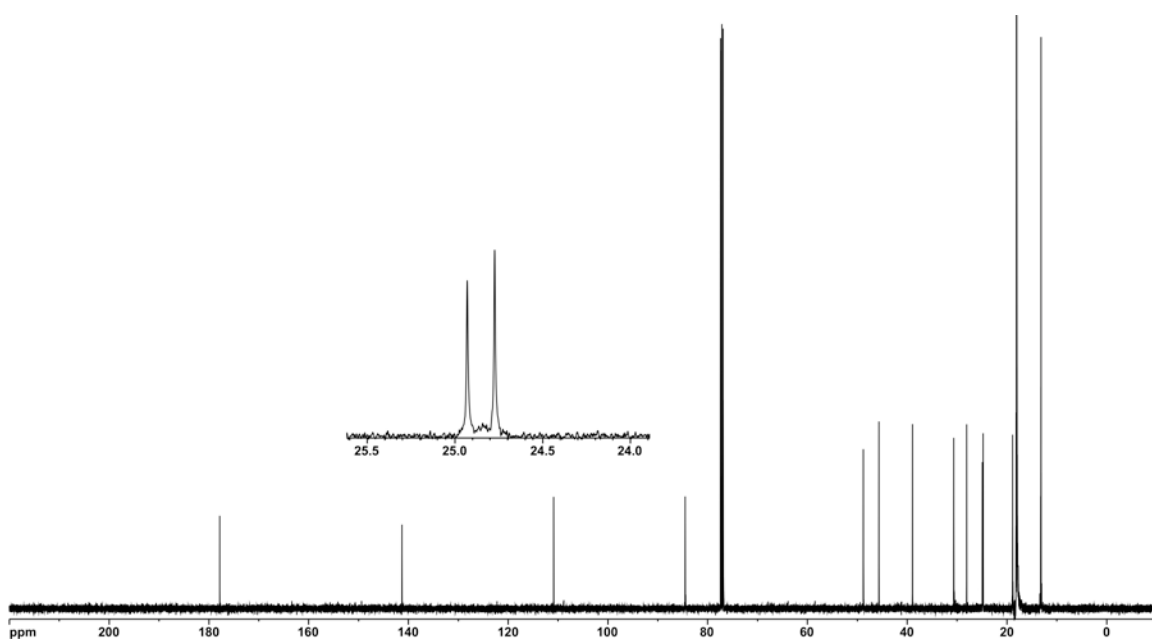

$^1\text{H}$  (500 MHz) and  $^{13}\text{C}$  NMR (125 MHz) spectra of tricyclic  $\gamma$ -lactone **(-)-14d'** in  $\text{CDCl}_3$

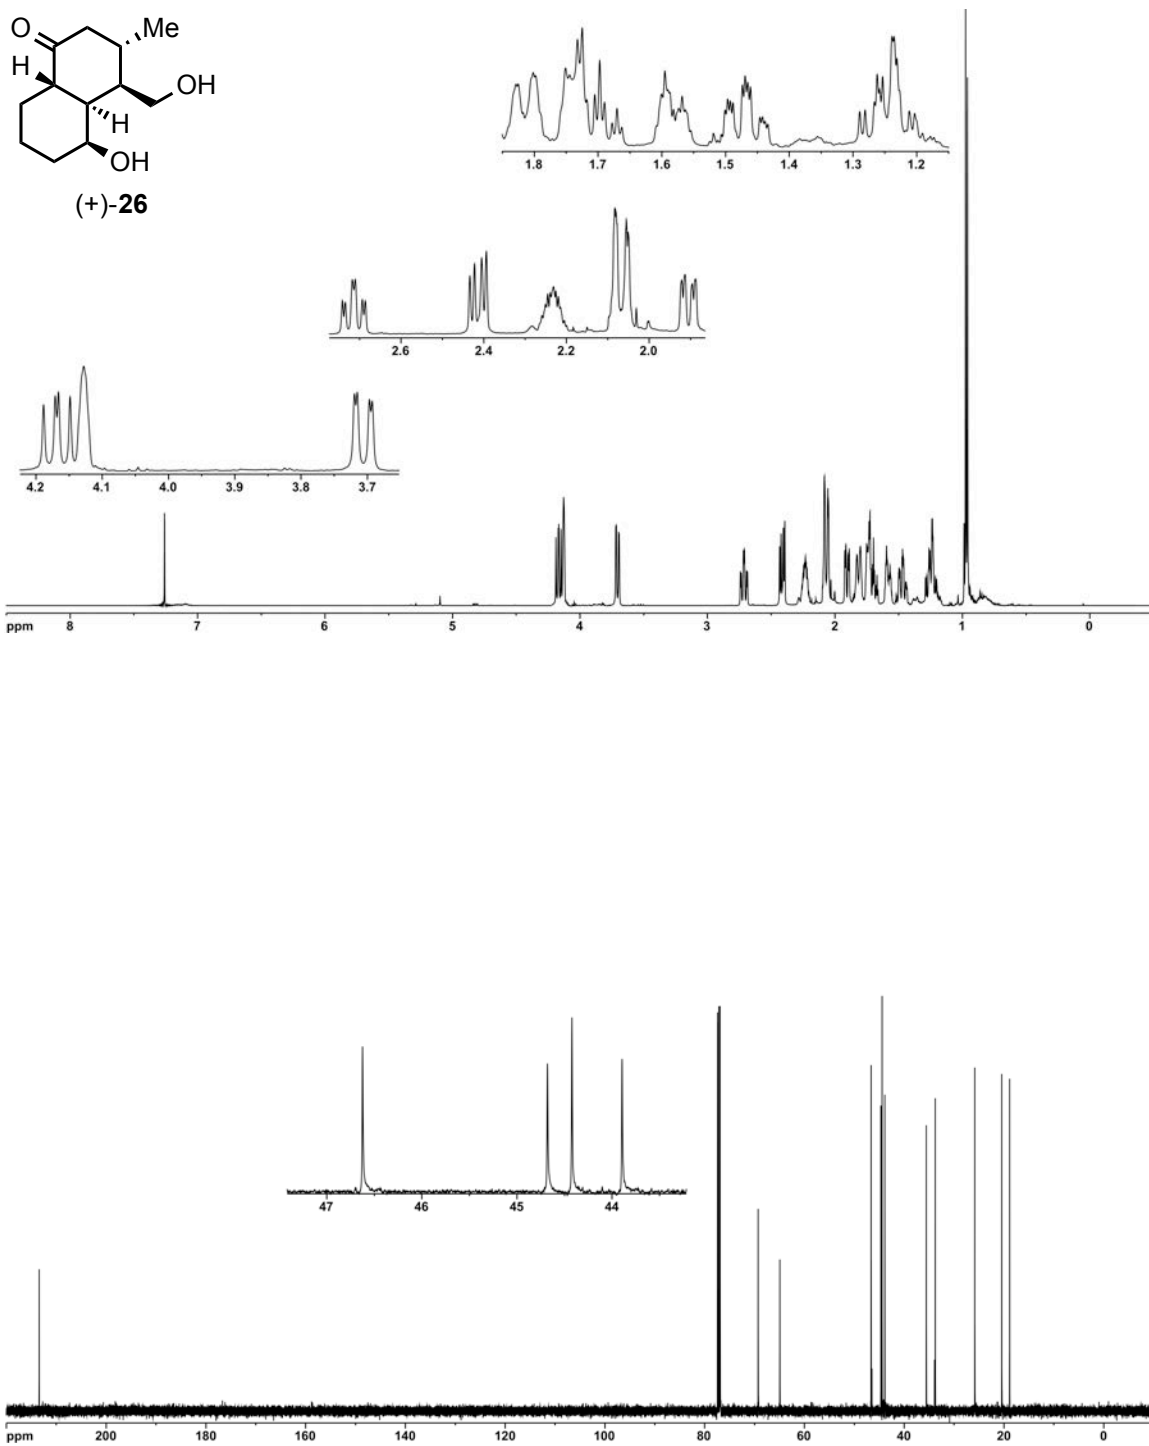

$^1\text{H}$  (500 MHz) and  $^{13}\text{C}$  NMR (125 MHz) spectra of ketone (+)-**26** in  $\text{CDCl}_3$

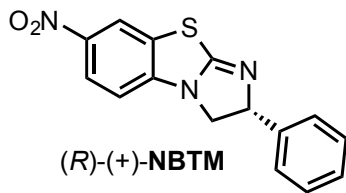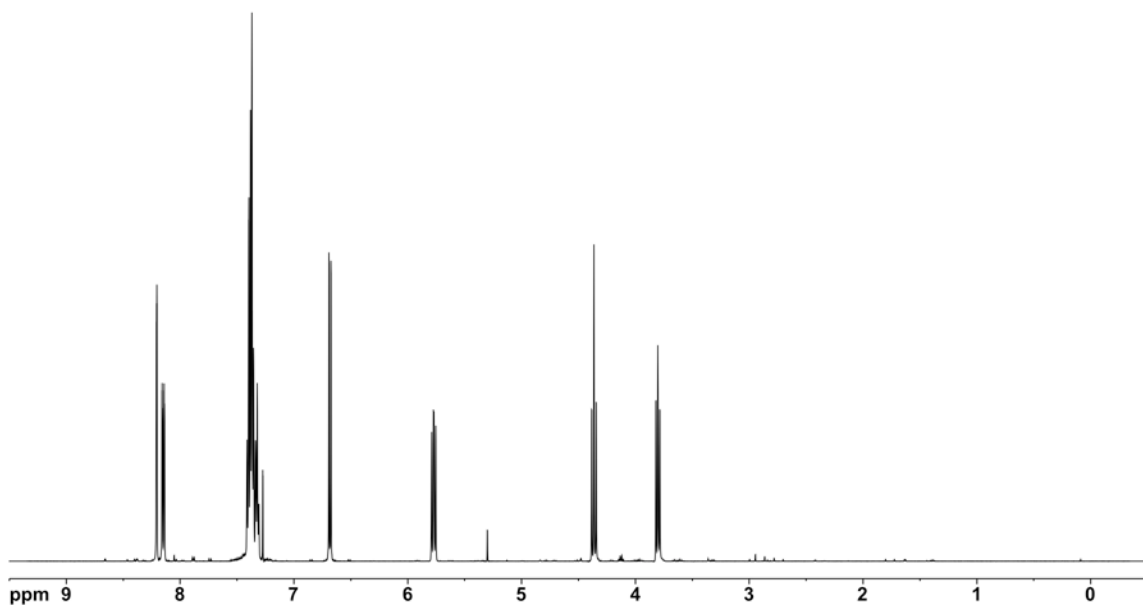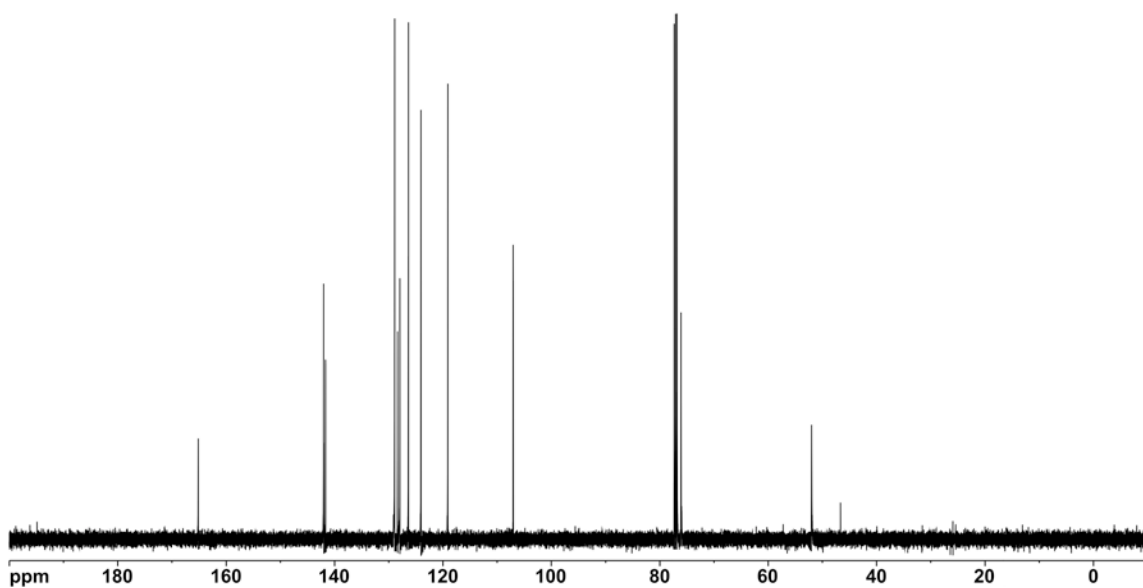

$^1\text{H}$  (500 MHz) and  $^{13}\text{C}$  NMR (125 MHz) spectra of (*R*)-(+)-**NBTM** in  $\text{CDCl}_3$

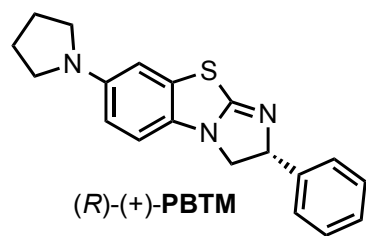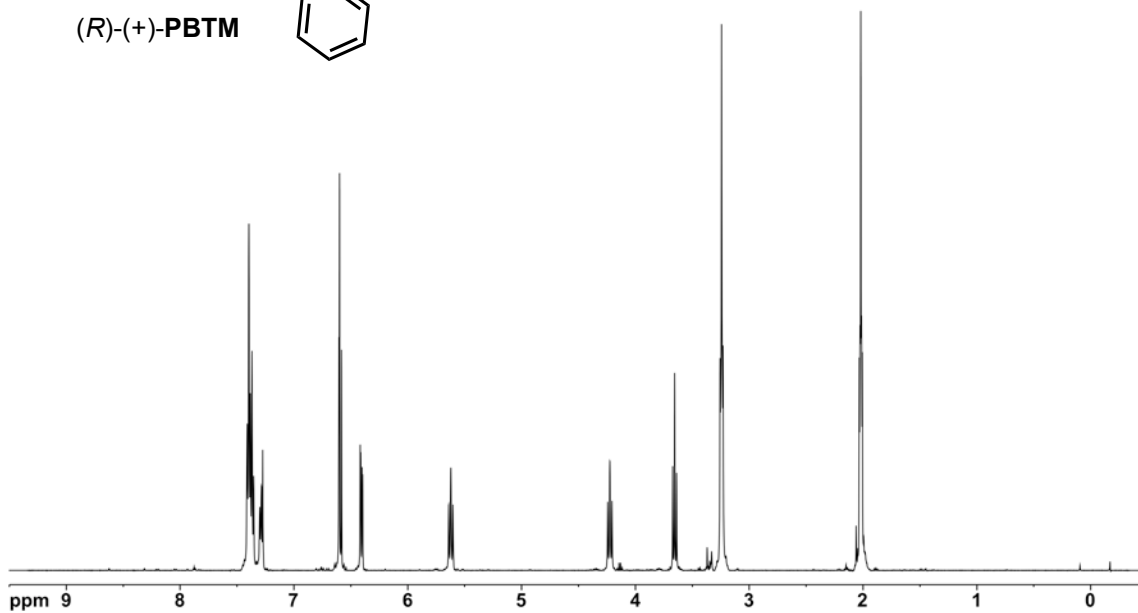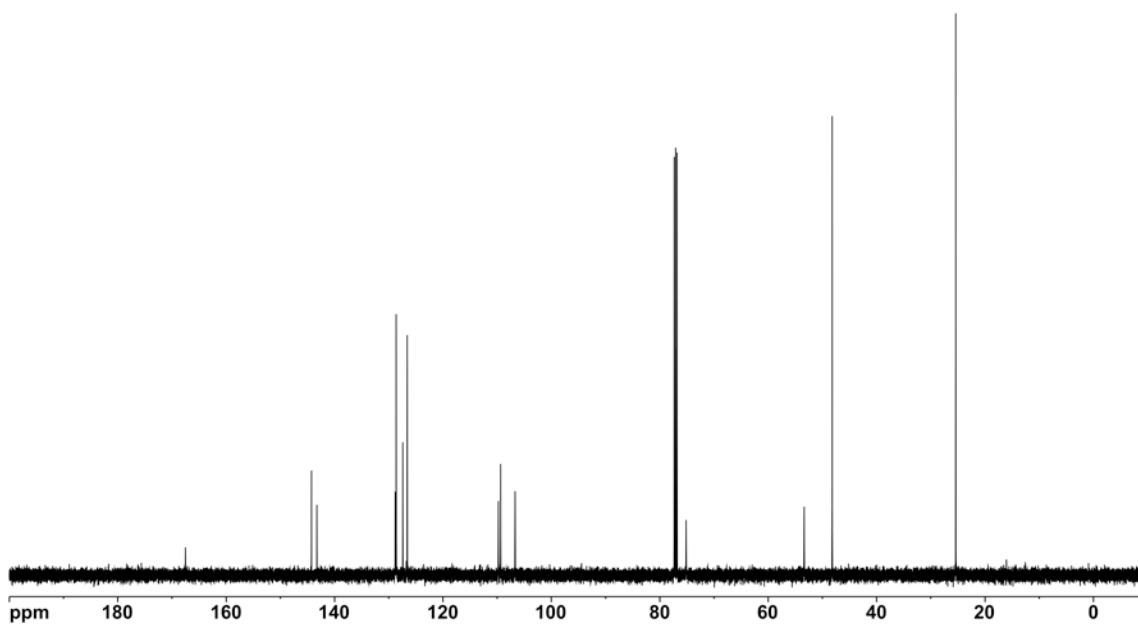

$^1\text{H}$  (500 MHz) and  $^{13}\text{C}$  NMR (125 MHz) spectra of (*R*)-(+)-**PBTM** in  $\text{CDCl}_3$



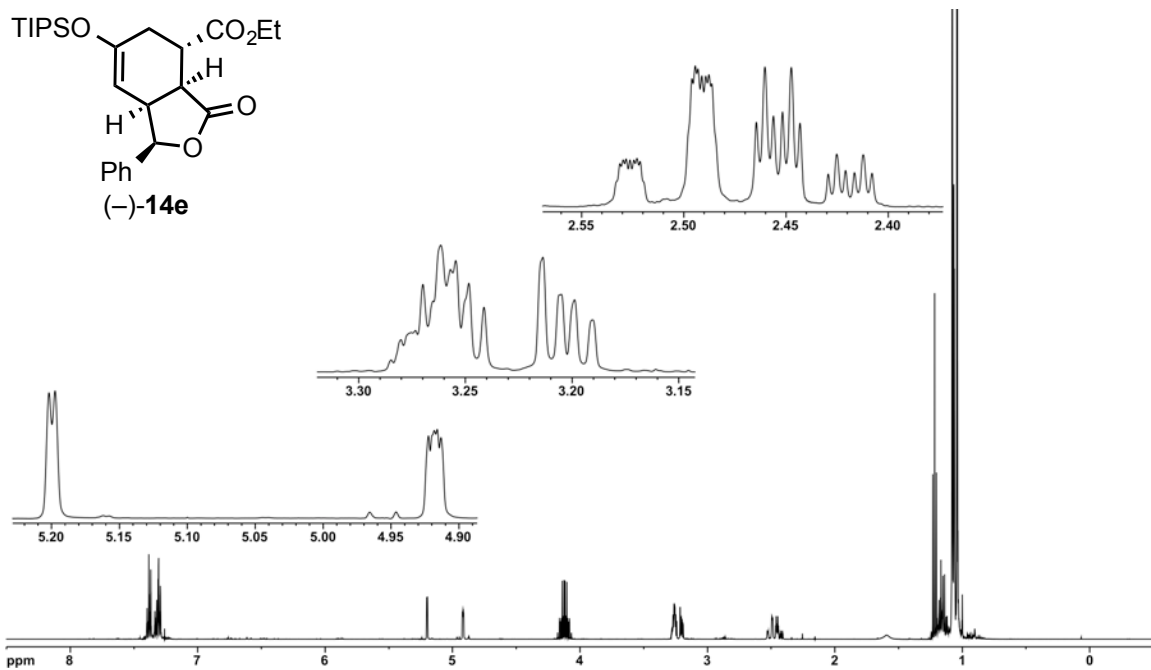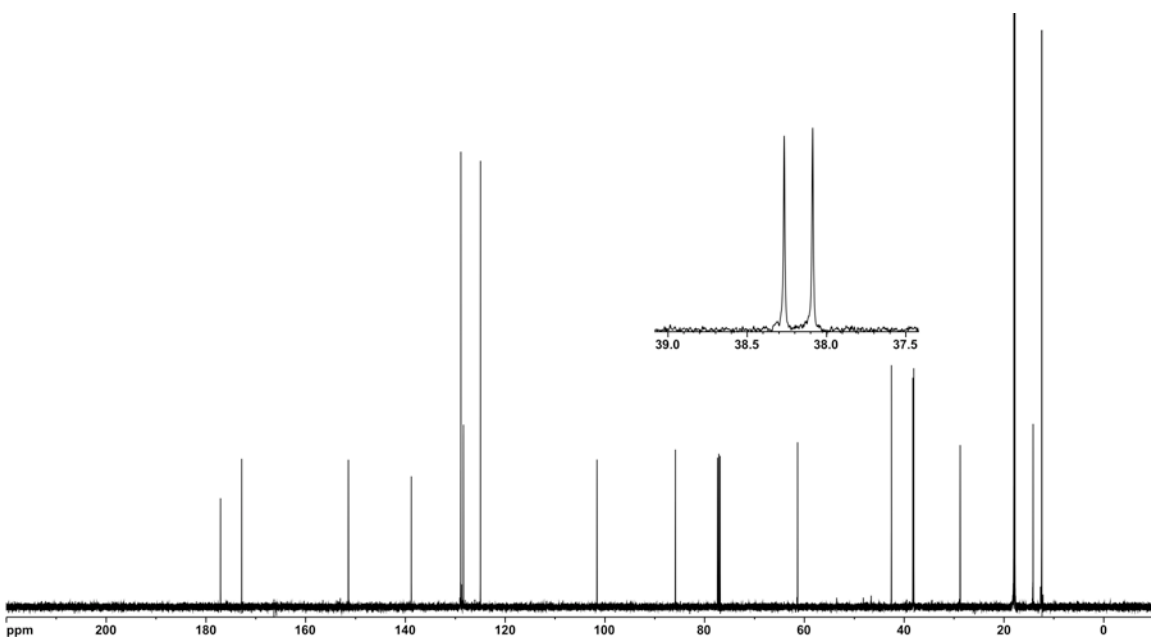

<sup>1</sup>H (500 MHz) and <sup>13</sup>C NMR (125 MHz) spectra of bicyclic  $\gamma$ -lactone **(-)-14e** in CDCl<sub>3</sub>

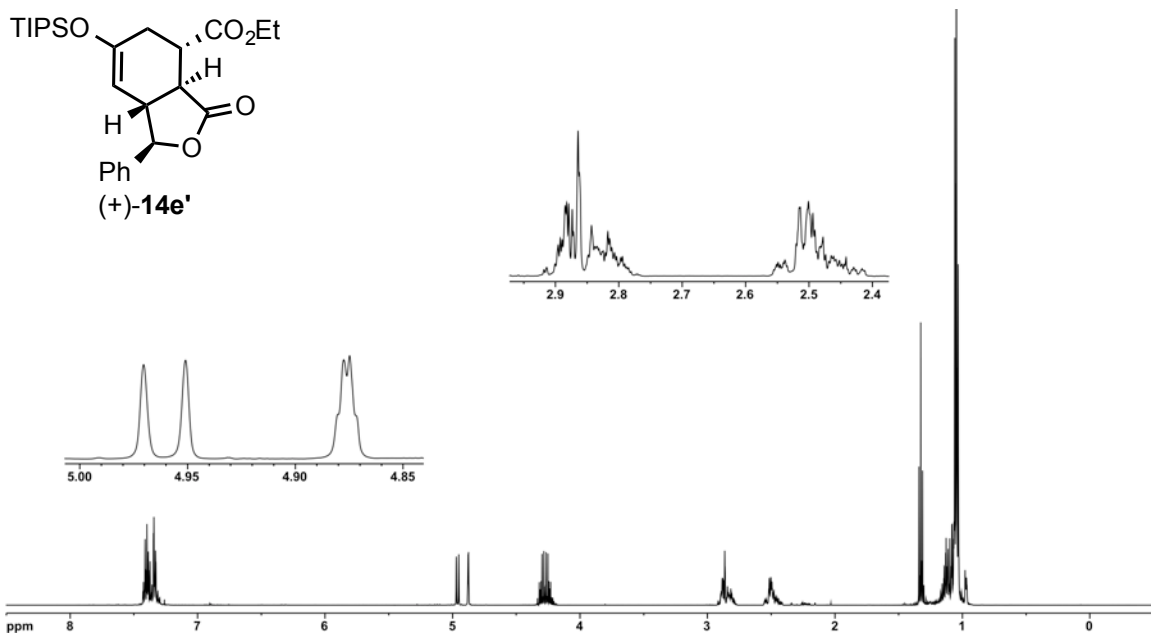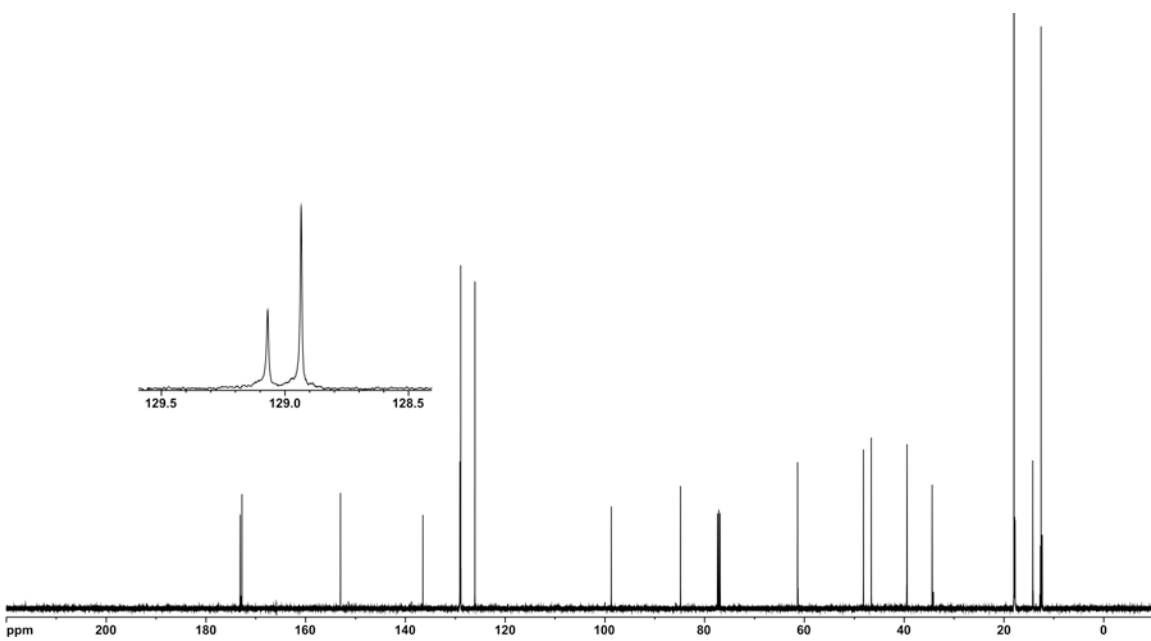

<sup>1</sup>H (500 MHz) and <sup>13</sup>C NMR (125 MHz) spectra of bicyclic  $\gamma$ -lactone (+)-**14e'** in CDCl<sub>3</sub>

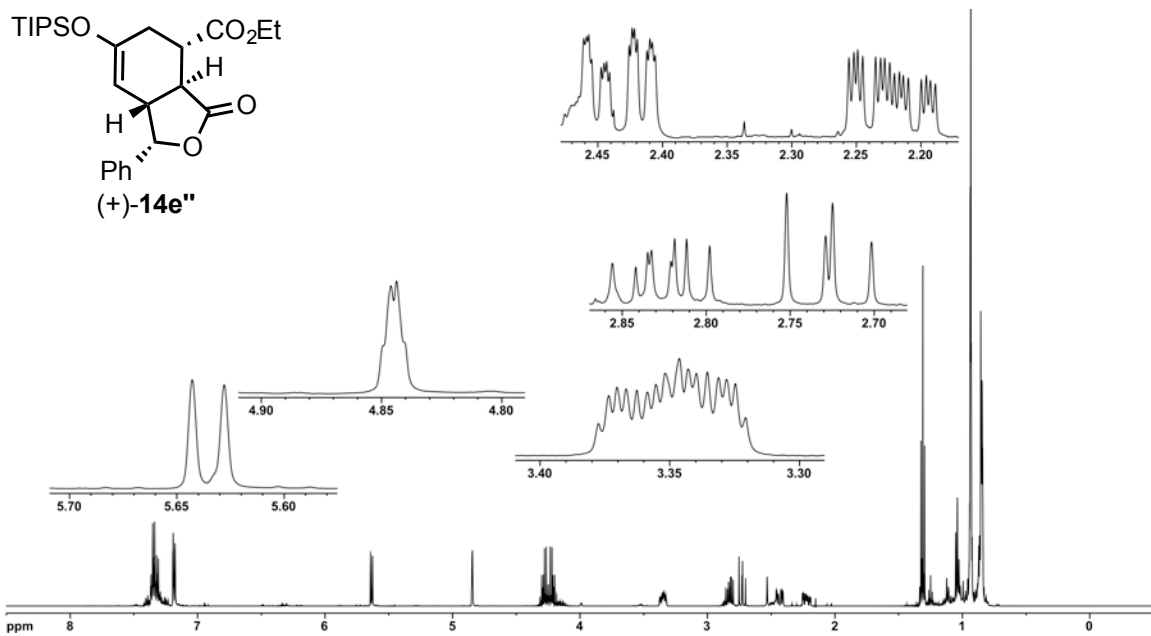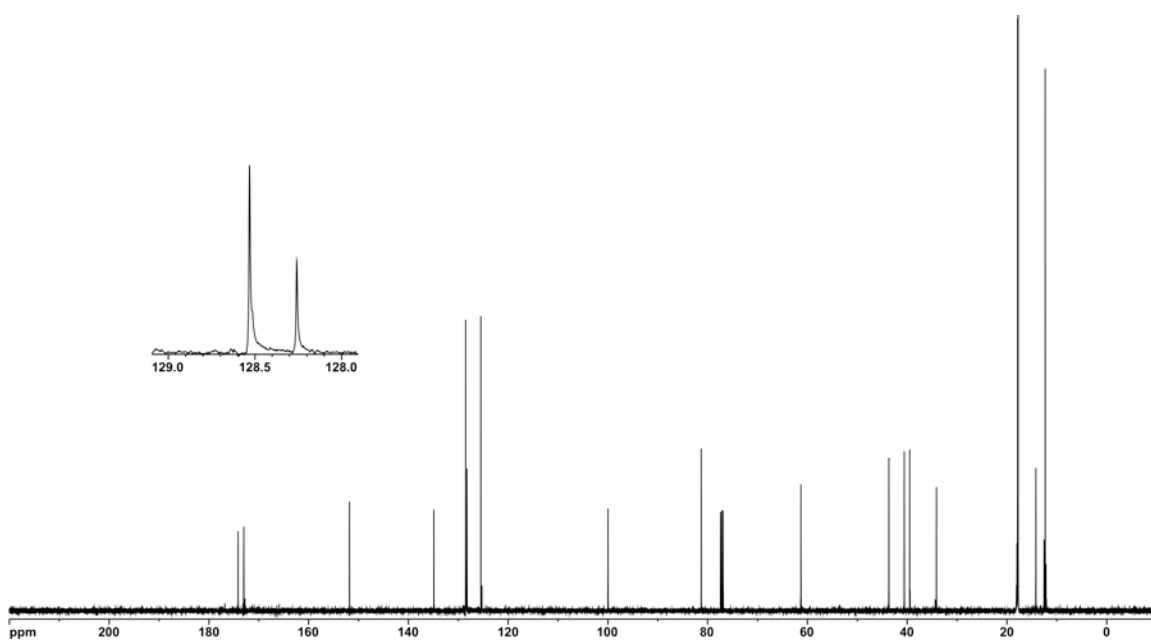

$^1\text{H}$  (500 MHz) and  $^{13}\text{C}$  NMR (125 MHz) spectra of bicyclic  $\gamma$ -lactone (+)-**14e''** in  $\text{CDCl}_3$

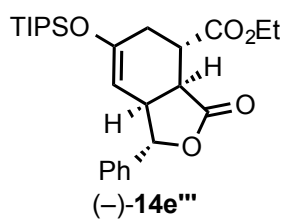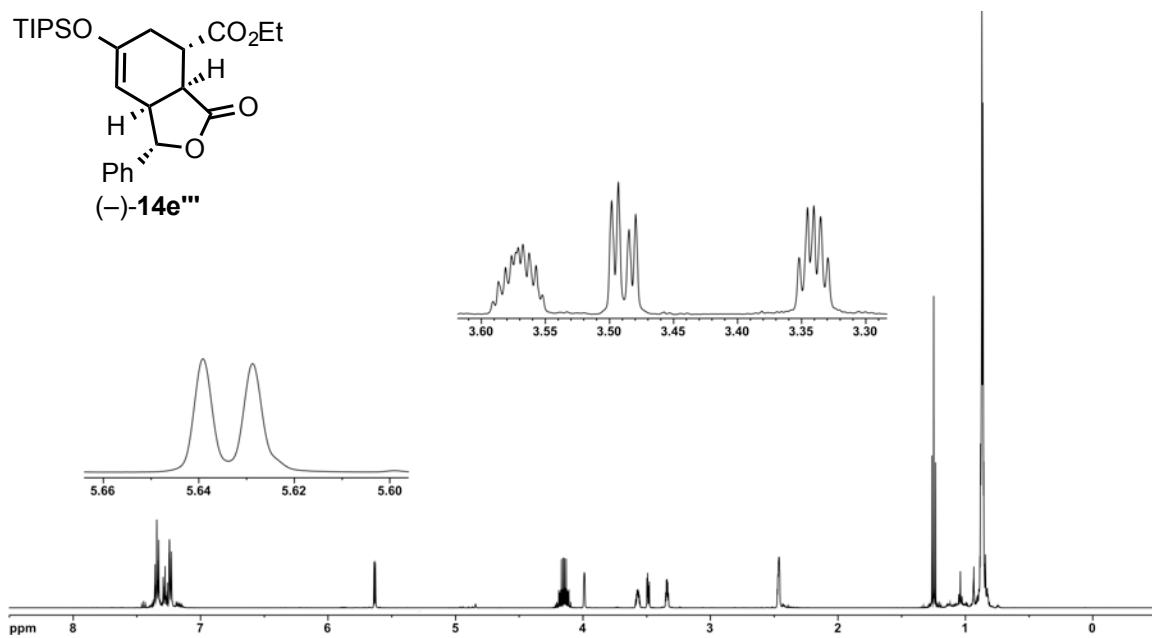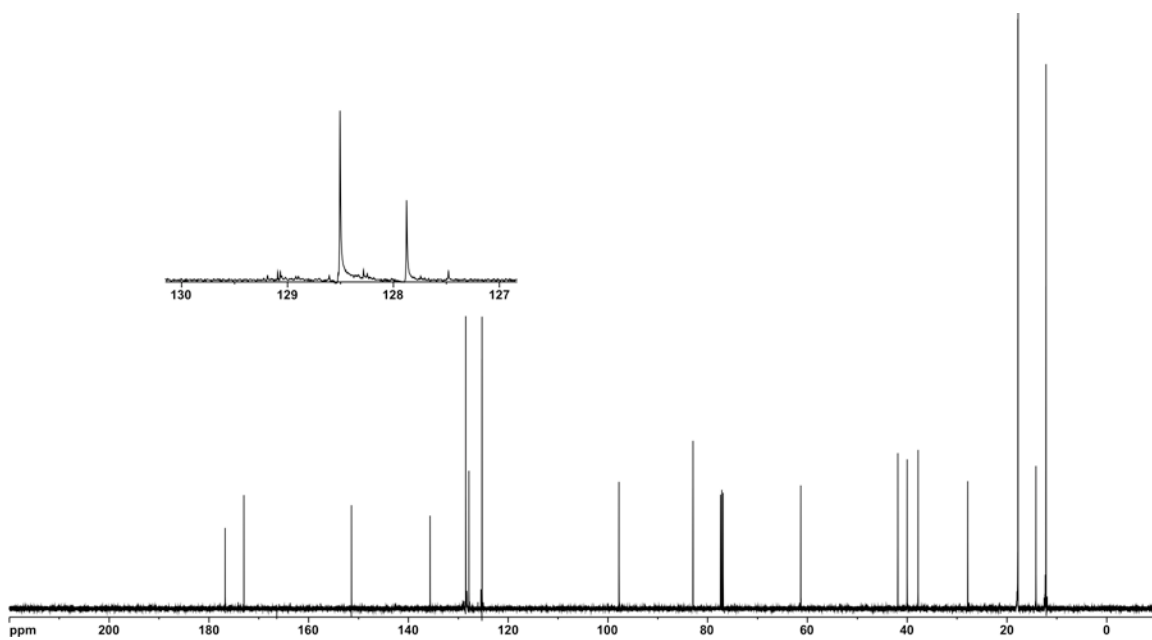

<sup>1</sup>H (500 MHz) and <sup>13</sup>C NMR (125 MHz) spectra of bicyclic  $\gamma$ -lactone (-)-**14e'''** in CDCl<sub>3</sub>

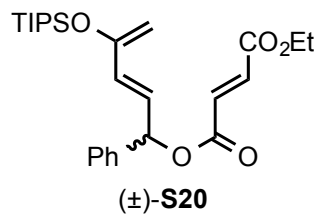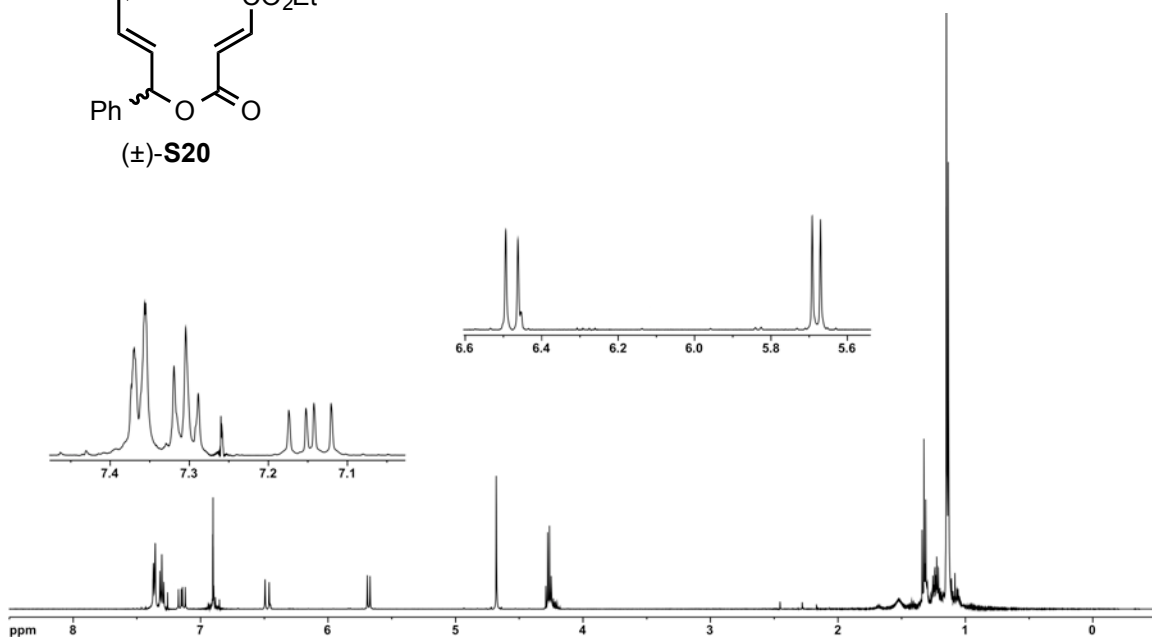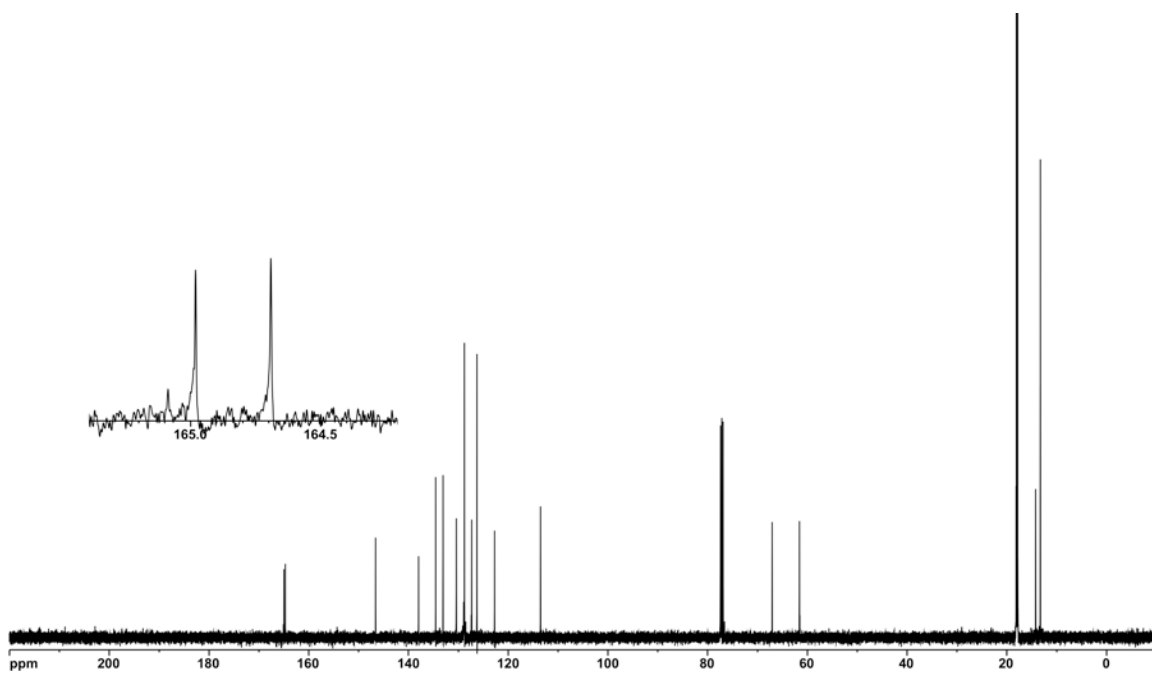

$^1\text{H}$  (500 MHz) and  $^{13}\text{C}$  NMR (125 MHz) spectra of ester (±)-**S20** in  $\text{CDCl}_3$

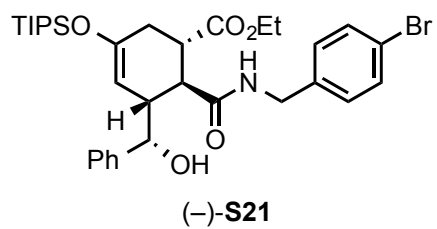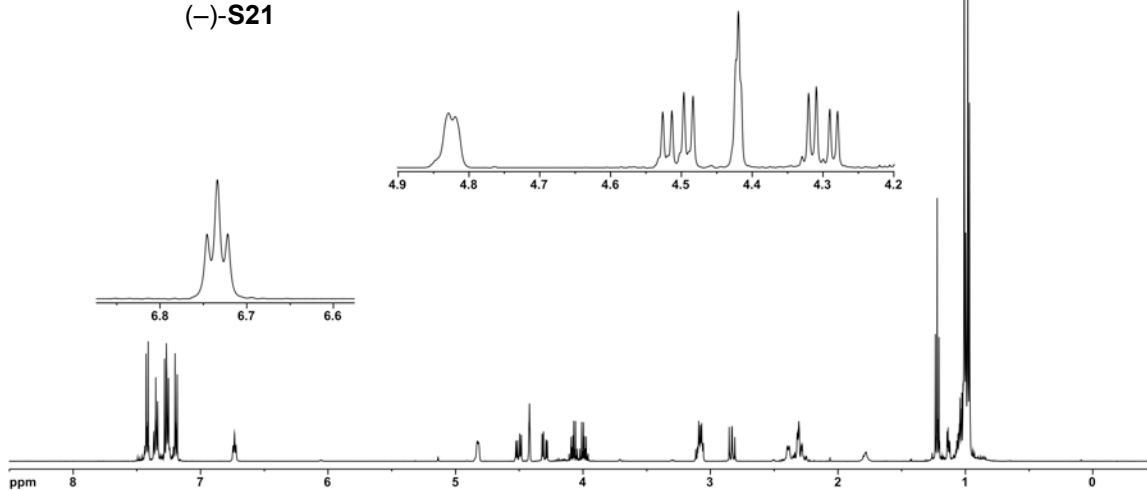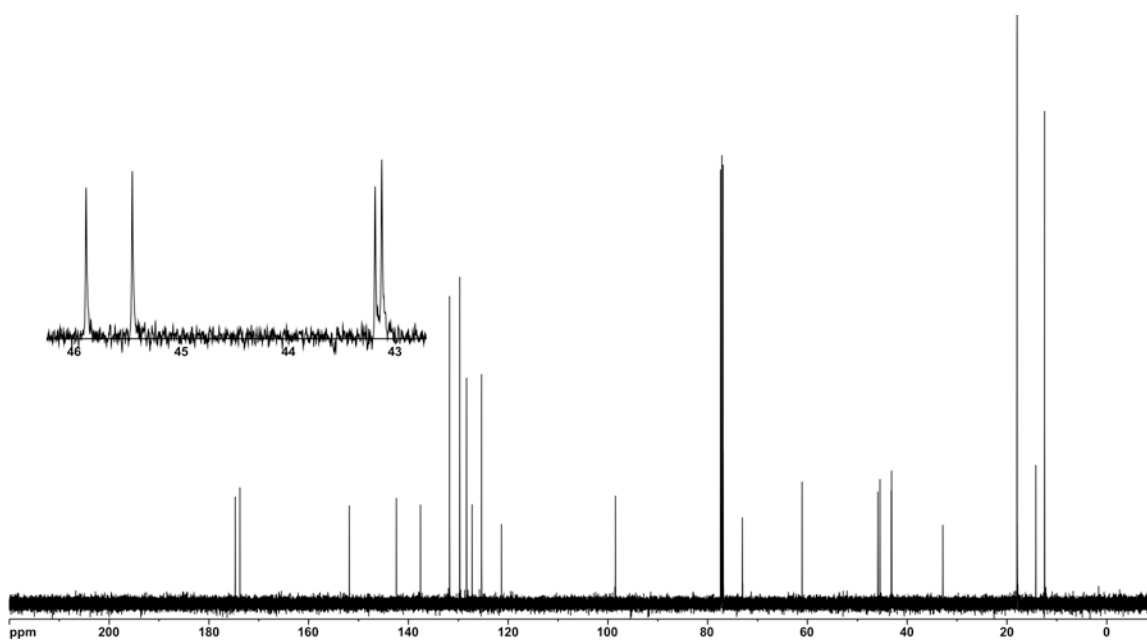

$^1\text{H}$  (500 MHz) and  $^{13}\text{C}$  NMR (125 MHz) spectra of amide (-)-**S21** in  $\text{CDCl}_3$

# Stereodivergent, Diels-Alder-Initiated Organocascades Employing $\alpha,\beta$ -Unsaturated Acylammonium Salts: Scope, Mechanism, and Application

Mikail E. Abbasov,<sup>†</sup> Brandi M. Hudson,<sup>‡</sup> Dean J. Tantillo<sup>‡,\*</sup> and Daniel Romo<sup>†,\*</sup>

<sup>†</sup>*Department of Chemistry and Biochemistry, Baylor University, One Bear Place 97348, Waco, Texas 76798, United States*

<sup>‡</sup>*Department of Chemistry, University of California–Davis, One Shields Avenue, Davis, California 95616, United States*

## **Table of Contents, cont.**

- Calculated coordinates and energies of the acylammonium salt formation and the DAL processes (**Tables S1 and S2, Figures S4 and S5, Schemes S1-S4**)..... S2–S204
  - a. Acylammonium salt formation
  - b. Diels-Alder step of the DAL organocascade
    - i. Acylammonium salts derived from Brønsted bases
    - ii. Modeling explicit base
    - iii. Entropy-controlled diastereoselection
  - c. Lactonization step of DAL organocascade
    - i. Proton-relay deprotonation pathway
    - ii. Ketene pathway
    - iii. Intramolecular proton-transfer pathway

**Calculated coordinates and energies of the acylammonium salt formation and the DAL processes (Tables S3 and S4, Figures S3 and S4, Schemes S1-S4):**

**a. Acylammonium salt formation**

*Ethyl fumaroyl chloride (5):*

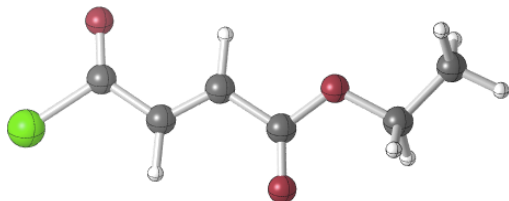

Charge = 0 Multiplicity = 1

HF = -918.5039922 hartrees (-576370.440145422 kcal/mol)

Imaginary Frequencies: none found

Zero-point correction = 0.126267 (Hartree/Particle)

Temperature 298.150 Kelvin. Pressure 1.00000 Atm.

Sum of electronic and thermal Free Energies =

-918.416338 hartrees (-576315.43625838 kcal/mol)

Coordinates (from last standard orientation):

| Center Number | Atomic Number | Coordinates (Angstroms) |           |           |
|---------------|---------------|-------------------------|-----------|-----------|
|               |               | X                       | Y         | Z         |
| 1             | 6             | -2.404785               | 0.535097  | -0.020979 |
| 2             | 6             | 0.008958                | 0.346013  | -0.031898 |
| 3             | 6             | -1.169862               | -0.277188 | -0.025157 |
| 4             | 6             | 1.268965                | -0.453229 | -0.032192 |
| 5             | 6             | 3.616705                | -0.317867 | -0.008249 |
| 6             | 6             | 4.675205                | 0.755901  | 0.080148  |
| 7             | 1             | 0.088461                | 1.428999  | -0.034584 |
| 8             | 1             | -1.250380               | -1.358672 | -0.017684 |
| 9             | 1             | 3.699592                | -0.904604 | -0.927911 |
| 10            | 1             | 3.655164                | -1.005150 | 0.841606  |
| 11            | 1             | 4.570953                | 1.326879  | 1.006880  |
| 12            | 1             | 5.665622                | 0.292605  | 0.068215  |
| 13            | 1             | 4.604344                | 1.443500  | -0.767095 |
| 14            | 8             | -2.491100               | 1.719758  | -0.059931 |



|    |    |           |           |           |
|----|----|-----------|-----------|-----------|
| 15 | 8  | 2.334266  | 0.343047  | -0.005009 |
| 16 | 8  | 1.311464  | -1.661878 | -0.054280 |
| 17 | 17 | -3.896583 | -0.468432 | 0.059665  |

*(S)-(-)-BTM catalyst:*

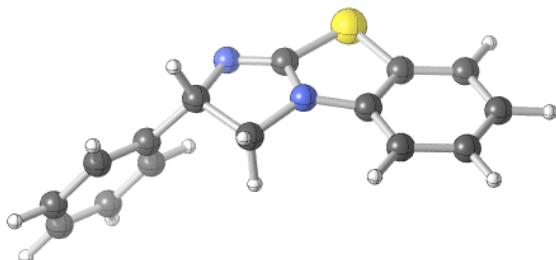

Charge = 0 Multiplicity = 1

HF = -1086.2217193 hartrees (-681614.991077943 kcal/mol)

Imaginary Frequencies: none found

Zero-point correction = 0.238948 (Hartree/Particle)

Temperature 298.150 Kelvin. Pressure 1.00000 Atm.

Sum of electronic and thermal Free Energies =

-1086.024409 hartrees (-681491.17689159 kcal/mol)

Coordinates (from last standard orientation):

| Center<br>Number | Atomic<br>Number | Coordinates (Angstroms) |           |           |
|------------------|------------------|-------------------------|-----------|-----------|
|                  |                  | X                       | Y         | Z         |
| 1                | 6                | -2.658926               | -1.872440 | 0.032577  |
| 2                | 6                | -2.123816               | -0.600345 | -0.141211 |
| 3                | 6                | -2.895105               | 0.543447  | 0.132450  |
| 4                | 6                | -4.207606               | 0.432725  | 0.561787  |
| 5                | 6                | -4.746737               | -0.845244 | 0.732328  |
| 6                | 6                | -3.978352               | -1.979555 | 0.473061  |
| 7                | 1                | -2.058599               | -2.752062 | -0.178240 |
| 8                | 1                | -4.800047               | 1.317910  | 0.772337  |
| 9                | 1                | -5.771715               | -0.949580 | 1.072628  |
| 10               | 1                | -4.410212               | -2.965542 | 0.613459  |
| 11               | 6                | -0.539268               | 1.070167  | -0.533267 |
| 12               | 16               | -1.966889               | 2.036351  | -0.147291 |
| 13               | 7                | -0.860156               | -0.271737 | -0.595974 |
| 14               | 6                | 0.395774                | -1.012047 | -0.630557 |
| 15               | 6                | 1.379397                | 0.139158  | -1.027978 |

|    |   |          |           |           |
|----|---|----------|-----------|-----------|
| 16 | 7 | 0.675758 | 1.406318  | -0.721608 |
| 17 | 6 | 2.713946 | 0.013122  | -0.330895 |
| 18 | 6 | 3.702254 | -0.807909 | -0.878940 |
| 19 | 6 | 2.957188 | 0.651293  | 0.886801  |
| 20 | 6 | 4.914045 | -0.995064 | -0.218440 |
| 21 | 1 | 3.520707 | -1.300931 | -1.831631 |
| 22 | 6 | 4.171891 | 0.470832  | 1.545054  |
| 23 | 1 | 2.193991 | 1.298559  | 1.309570  |
| 24 | 6 | 5.151970 | -0.354415 | 0.996466  |
| 25 | 1 | 5.674328 | -1.635977 | -0.655503 |
| 26 | 1 | 4.353595 | 0.977589  | 2.488602  |
| 27 | 1 | 6.098468 | -0.494531 | 1.510257  |
| 28 | 1 | 0.621577 | -1.422838 | 0.361589  |
| 29 | 1 | 0.374413 | -1.817883 | -1.366373 |
| 30 | 1 | 1.544570 | 0.099252  | -2.112384 |

Pyridine:

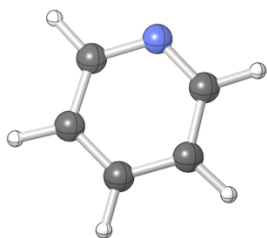

Charge = 0 Multiplicity = 1

HF = -248.1825344 hartrees (-155737.022161344 kcal/mol)

Imaginary Frequencies: none found

Zero-point correction = 0.089996 (Hartree/Particle)

Temperature 298.150 Kelvin. Pressure 1.00000 Atm.

Sum of electronic and thermal Free Energies =

-248.119925 hartrees (-155697.73413675 kcal/mol)

Coordinates (from last standard orientation):

| -----  |        |                         |           |           |
|--------|--------|-------------------------|-----------|-----------|
| Center | Atomic | Coordinates (Angstroms) |           |           |
| Number | Number | X                       | Y         | Z         |
| -----  |        |                         |           |           |
| 1      | 6      | -1.142102               | -0.719597 | -0.000217 |
| 2      | 6      | -1.196328               | 0.671850  | -0.000121 |
| 3      | 6      | 0.000902                | 1.381216  | 0.000104  |
| 4      | 6      | 1.197209                | 0.670340  | 0.000218  |
| 5      | 6      | 1.141159                | -0.721043 | 0.000118  |

|    |   |           |           |           |
|----|---|-----------|-----------|-----------|
| 6  | 7 | -0.000923 | -1.415997 | -0.000098 |
| 7  | 1 | 0.001567  | 2.467257  | 0.000147  |
| 8  | 1 | -2.059831 | -1.303684 | -0.000375 |
| 9  | 1 | -2.154573 | 1.180453  | -0.000237 |
| 10 | 1 | 2.156120  | 1.177679  | 0.000362  |
| 11 | 1 | 2.058136  | -1.306319 | 0.000177  |

2,6-dimethylpyridine/2,6-lutidine (DMP):

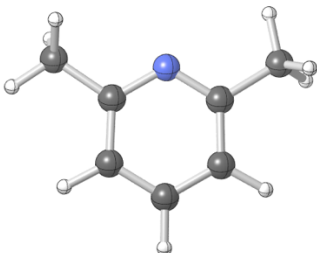

Charge = 0 Multiplicity = 1

HF = -326.7824947 hartrees (-205059.283249197 kcal/mol)

Imaginary Frequencies: none found

Zero-point correction = 0.145307 (Hartree/Particle)

Temperature 298.150 Kelvin. Pressure 1.00000 Atm.

Sum of electronic and thermal Free Energies =

-326.669833 hartrees (-204988.58690583 kcal/mol)

Coordinates (from last standard orientation):

| Center<br>Number | Atomic<br>Number | Coordinates (Angstroms) |           |           |
|------------------|------------------|-------------------------|-----------|-----------|
|                  |                  | X                       | Y         | Z         |
| 1                | 6                | -1.160473               | -0.261946 | -0.004035 |
| 2                | 6                | -1.195166               | 1.131299  | -0.003236 |
| 3                | 6                | 0.008859                | 1.831739  | 0.000842  |
| 4                | 6                | 1.199720                | 1.121255  | 0.003073  |
| 5                | 6                | 1.149738                | -0.278042 | 0.001039  |
| 6                | 7                | -0.006143               | -0.949731 | -0.002114 |
| 7                | 1                | 0.013558                | 2.918072  | 0.001370  |
| 8                | 1                | -2.147267               | 1.652127  | -0.005575 |
| 9                | 1                | 2.159615                | 1.628875  | 0.005136  |
| 10               | 6                | 2.418847                | -1.088539 | -0.000521 |
| 11               | 1                | 3.018921                | -0.873332 | -0.891088 |
| 12               | 1                | 3.035787                | -0.852185 | 0.872816  |
| 13               | 1                | 2.182057                | -2.154074 | 0.013626  |

|    |   |           |           |           |
|----|---|-----------|-----------|-----------|
| 14 | 6 | -2.421617 | -1.082545 | 0.002318  |
| 15 | 1 | -2.405224 | -1.812259 | -0.812977 |
| 16 | 1 | -2.505201 | -1.644612 | 0.938663  |
| 17 | 1 | -3.308700 | -0.453813 | -0.104057 |

2,6-di-tert-butylpyridine (DTBP):

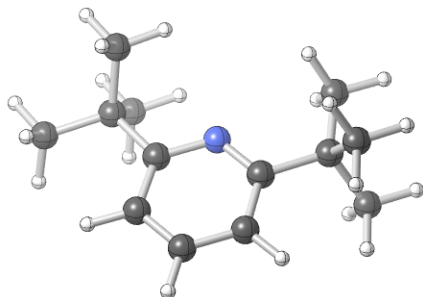

Charge = 0 Multiplicity = 1

HF = -562.5492239 hartrees (-353005.263489489 kcal/mol)

Imaginary Frequencies: none found

Zero-point correction = 0.317107 (Hartree/Particle)

Temperature 298.150 Kelvin. Pressure 1.00000 Atm.

Sum of electronic and thermal Free Energies =

-562.273067 hartrees (-352831.97227317 kcal/mol)

Coordinates (from last standard orientation):

| Center<br>Number | Atomic<br>Number | Coordinates (Angstroms) |           |           |
|------------------|------------------|-------------------------|-----------|-----------|
|                  |                  | X                       | Y         | Z         |
| 1                | 6                | -1.180576               | 0.408335  | 0.000012  |
| 2                | 6                | -1.196169               | 1.801476  | 0.000030  |
| 3                | 6                | 0.020059                | 2.483821  | 0.000015  |
| 4                | 6                | 1.203313                | 1.764779  | 0.000014  |
| 5                | 6                | 1.140468                | 0.362841  | 0.000020  |
| 6                | 7                | -0.025905               | -0.281671 | 0.000002  |
| 7                | 1                | 0.036770                | 3.570270  | 0.000014  |
| 8                | 1                | -2.129443               | 2.351939  | 0.000055  |
| 9                | 1                | 2.161256                | 2.275372  | -0.000046 |
| 10               | 6                | 2.427044                | -0.465323 | 0.000012  |
| 11               | 6                | -2.447816               | -0.446644 | 0.000006  |
| 12               | 6                | 3.248229                | -0.121989 | -1.253476 |
| 13               | 1                | 2.685170                | -0.348760 | -2.165585 |
| 14               | 1                | 3.526194                | 0.936952  | -1.277977 |

|    |   |           |           |           |
|----|---|-----------|-----------|-----------|
| 15 | 1 | 4.172053  | -0.711602 | -1.267600 |
| 16 | 6 | 3.248604  | -0.121667 | 1.253141  |
| 17 | 1 | 2.685684  | -0.347765 | 2.165520  |
| 18 | 1 | 4.172188  | -0.711639 | 1.267336  |
| 19 | 1 | 3.527053  | 0.937160  | 1.277196  |
| 20 | 6 | -2.437773 | -1.336562 | -1.252285 |
| 21 | 1 | -1.544821 | -1.967951 | -1.271301 |
| 22 | 1 | -3.322060 | -1.983973 | -1.261600 |
| 23 | 1 | -2.448767 | -0.730163 | -2.165274 |
| 24 | 6 | -3.719983 | 0.403906  | -0.000109 |
| 25 | 1 | -4.597561 | -0.251212 | 0.000066  |
| 26 | 1 | -3.781104 | 1.042591  | 0.888226  |
| 27 | 1 | -3.781200 | 1.042218  | -0.888705 |
| 28 | 6 | -2.437923 | -1.336436 | 1.252372  |
| 29 | 1 | -2.448957 | -0.729938 | 2.165298  |
| 30 | 1 | -3.322269 | -1.983765 | 1.261674  |
| 31 | 1 | -1.545030 | -1.967899 | 1.271548  |
| 32 | 6 | 2.126182  | -1.964744 | 0.000270  |
| 33 | 1 | 1.552170  | -2.259233 | -0.883510 |
| 34 | 1 | 3.069237  | -2.522631 | -0.000029 |
| 35 | 1 | 1.552819  | -2.259038 | 0.884539  |

*Triethylamine (Et<sub>3</sub>N):*

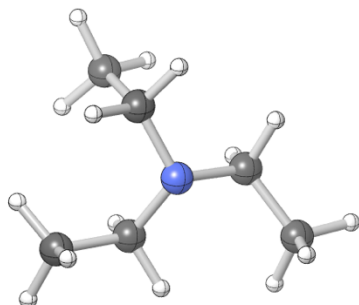

Charge = 0 Multiplicity = 1

HF = -292.2638816 hartrees (-183398.508342816 kcal/mol)

Imaginary Frequencies: none found

Zero-point correction = 0.208620 (Hartree/Particle)

Temperature 298.150 Kelvin. Pressure 1.00000 Atm.

Sum of electronic and thermal Free Energies =

-292.089062 hartrees (-183288.80729562 kcal/mol)

Coordinates (from last standard orientation):

| Center<br>Number | Atomic<br>Number | Coordinates (Angstroms) |           |           |
|------------------|------------------|-------------------------|-----------|-----------|
|                  |                  | X                       | Y         | Z         |
| 1                | 7                | 0.183969                | 0.005692  | -0.445264 |
| 2                | 6                | -0.204347               | 1.123379  | 0.414541  |
| 3                | 1                | 0.638993                | 1.820019  | 0.450668  |
| 4                | 1                | -0.380524               | 0.793774  | 1.456147  |
| 5                | 6                | -1.425177               | 1.877805  | -0.095980 |
| 6                | 1                | -2.344811               | 1.290972  | -0.007201 |
| 7                | 1                | -1.561711               | 2.797111  | 0.481725  |
| 8                | 1                | -1.292766               | 2.151361  | -1.148164 |
| 9                | 6                | 1.368106                | -0.677779 | 0.073941  |
| 10               | 1                | 1.527512                | -1.567188 | -0.547173 |
| 11               | 1                | 1.215926                | -1.035565 | 1.109206  |
| 12               | 6                | 2.625140                | 0.185070  | 0.026900  |
| 13               | 1                | 2.604173                | 0.991360  | 0.765704  |
| 14               | 1                | 3.506243                | -0.428581 | 0.239127  |
| 15               | 1                | 2.744239                | 0.630089  | -0.966356 |
| 16               | 6                | -0.909729               | -0.934232 | -0.704327 |
| 17               | 1                | -1.682109               | -0.412647 | -1.279751 |
| 18               | 1                | -0.510072               | -1.714369 | -1.362800 |
| 19               | 6                | -1.551309               | -1.587076 | 0.522755  |
| 20               | 1                | -2.009638               | -0.842789 | 1.182978  |
| 21               | 1                | -2.337664               | -2.280561 | 0.207131  |
| 22               | 1                | -0.821674               | -2.155837 | 1.108622  |

*N,N*-diisopropylethylamine (Hünig's base):

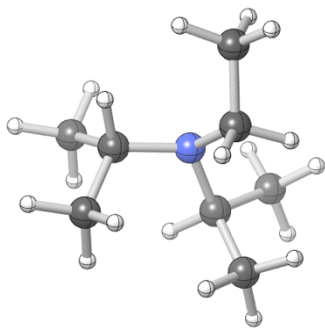

Charge = 0 Multiplicity = 1

HF = -370.8512296 hartrees (-232712.855086296 kcal/mol)

Imaginary Frequencies: none found

Zero-point correction = 0.264971 (Hartree/Particle)

Temperature 298.150 Kelvin. Pressure 1.00000 Atm.

Sum of electronic and thermal Free Energies =  
-370.623000 hartrees (-232569.63873 kcal/mol)

Coordinates (from last standard orientation):

| Center<br>Number | Atomic<br>Number | Coordinates (Angstroms) |           |           |
|------------------|------------------|-------------------------|-----------|-----------|
|                  |                  | X                       | Y         | Z         |
| 1                | 7                | -0.006149               | 0.269353  | -0.238357 |
| 2                | 6                | 1.059871                | -0.745243 | -0.178059 |
| 3                | 6                | -1.375137               | -0.238523 | -0.070324 |
| 4                | 1                | -2.012282               | 0.651431  | -0.014384 |
| 5                | 6                | 0.270351                | 1.477969  | 0.532653  |
| 6                | 1                | 1.353621                | 1.635972  | 0.530137  |
| 7                | 1                | -0.023669               | 1.376472  | 1.593245  |
| 8                | 6                | -1.623659               | -1.055763 | 1.204151  |
| 9                | 1                | -1.314056               | -0.509602 | 2.101703  |
| 10               | 1                | -2.690827               | -1.282688 | 1.303522  |
| 11               | 1                | -1.083257               | -2.008995 | 1.175890  |
| 12               | 6                | -0.381945               | 2.720065  | -0.066839 |
| 13               | 1                | -1.474801               | 2.664507  | -0.058023 |
| 14               | 1                | -0.057128               | 2.849836  | -1.104117 |
| 15               | 6                | 2.145273                | -0.410267 | -1.201556 |
| 16               | 1                | 1.716725                | -0.343747 | -2.206163 |
| 17               | 1                | 2.617300                | 0.552285  | -0.970067 |
| 18               | 1                | 2.931039                | -1.173875 | -1.204178 |
| 19               | 1                | 0.601667                | -1.691992 | -0.485529 |
| 20               | 1                | -0.094660               | 3.610729  | 0.501865  |
| 21               | 6                | -1.819231               | -1.020263 | -1.307062 |
| 22               | 1                | -2.885234               | -1.263479 | -1.242411 |
| 23               | 1                | -1.650251               | -0.428922 | -2.212203 |
| 24               | 1                | -1.274600               | -1.965634 | -1.408852 |
| 25               | 6                | 1.690193                | -0.970464 | 1.204786  |
| 26               | 1                | 0.939207                | -1.160258 | 1.976242  |
| 27               | 1                | 2.361975                | -1.835005 | 1.167265  |
| 28               | 1                | 2.287975                | -0.107567 | 1.518051  |

*Acylammonium formation between ethyl fumaroyl chloride (5) and (S)-(-)-BTM:*

*Reactant:*

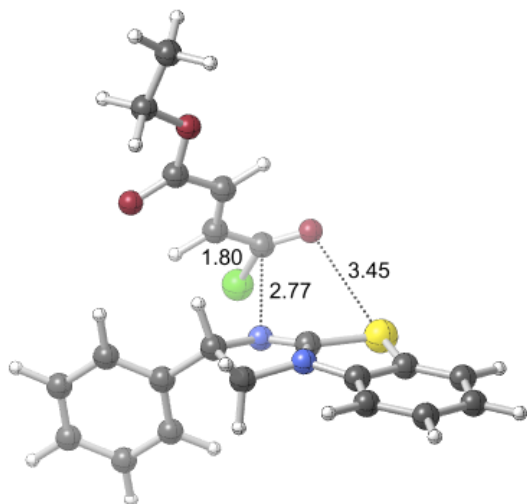

Charge = 0 Multiplicity = 1

HF = -2004.7354502 hartrees (-1257991.542355 kcal/mol)

Imaginary Frequencies: none found

Zero-point correction = 0.366518 (Hartree/Particle)

Temperature 298.150 Kelvin. Pressure 1.00000 Atm.

Sum of electronic and thermal Free Energies =

-2004.430122 hartrees (-1257799.94585622 kcal/mol)

Coordinates (from last standard orientation):

| Center Number | Atomic Number | Coordinates (Angstroms) |           |           |
|---------------|---------------|-------------------------|-----------|-----------|
|               |               | X                       | Y         | Z         |
| 1             | 6             | 4.016255                | -0.750918 | -1.998485 |
| 2             | 6             | 3.259790                | -0.501244 | -0.858454 |
| 3             | 6             | 3.801530                | -0.715302 | 0.421748  |
| 4             | 6             | 5.094135                | -1.189442 | 0.578939  |
| 5             | 6             | 5.853737                | -1.441601 | -0.565986 |
| 6             | 6             | 5.319468                | -1.220478 | -1.835275 |
| 7             | 1             | 3.592958                | -0.583080 | -2.983890 |
| 8             | 1             | 5.509950                | -1.351574 | 1.568622  |
| 9             | 1             | 6.869138                | -1.809285 | -0.461213 |
| 10            | 1             | 5.923341                | -1.419464 | -2.715145 |
| 11            | 6             | 1.494327                | 0.242923  | 0.472386  |
| 12            | 16            | 2.636113                | -0.299426 | 1.701476  |



|    |    |           |           |           |
|----|----|-----------|-----------|-----------|
| 13 | 7  | 1.949409  | -0.063504 | -0.793986 |
| 14 | 6  | 1.100575  | 0.659484  | -1.736775 |
| 15 | 1  | 1.594154  | 1.586983  | -2.055080 |
| 16 | 1  | 0.851405  | 0.055083  | -2.609959 |
| 17 | 6  | -0.133684 | 0.930631  | -0.824512 |
| 18 | 7  | 0.375597  | 0.850508  | 0.569851  |
| 19 | 6  | -0.843907 | 2.231573  | -1.104753 |
| 20 | 6  | -2.129435 | 2.224942  | -1.647200 |
| 21 | 6  | -0.225405 | 3.453587  | -0.824667 |
| 22 | 6  | -2.785762 | 3.424734  | -1.922230 |
| 23 | 1  | -2.620123 | 1.273276  | -1.841152 |
| 24 | 6  | -0.880019 | 4.651035  | -1.095775 |
| 25 | 1  | 0.768328  | 3.462197  | -0.382736 |
| 26 | 6  | -2.160780 | 4.638783  | -1.649903 |
| 27 | 1  | -3.786666 | 3.408481  | -2.343711 |
| 28 | 1  | -0.392567 | 5.595838  | -0.873115 |
| 29 | 1  | -2.671501 | 5.573898  | -1.860521 |
| 30 | 1  | -0.851966 | 0.110325  | -0.961783 |
| 31 | 6  | -1.188677 | -0.049738 | 2.672937  |
| 32 | 6  | -1.999878 | -0.363416 | 1.475493  |
| 33 | 6  | -2.110974 | -1.629256 | 1.073431  |
| 34 | 6  | -2.890706 | -1.942999 | -0.154787 |
| 35 | 6  | -3.757958 | -3.680892 | -1.482621 |
| 36 | 6  | -3.751378 | -5.191427 | -1.494734 |
| 37 | 1  | -2.480699 | 0.454999  | 0.948125  |
| 38 | 1  | -4.771155 | -3.274411 | -1.415224 |
| 39 | 1  | -3.278592 | -3.258979 | -2.370683 |
| 40 | 1  | -4.221830 | -5.589014 | -0.591224 |
| 41 | 1  | -4.309962 | -5.550733 | -2.363489 |
| 42 | 1  | -2.729380 | -5.575181 | -1.557370 |
| 43 | 1  | -1.641989 | -2.449145 | 1.608776  |
| 44 | 8  | -0.424087 | -0.766861 | 3.233512  |
| 45 | 8  | -3.343798 | -1.113150 | -0.914108 |
| 46 | 8  | -3.018747 | -3.257622 | -0.318854 |
| 47 | 17 | -1.529421 | 1.590397  | 3.329944  |

Transition state (TS):

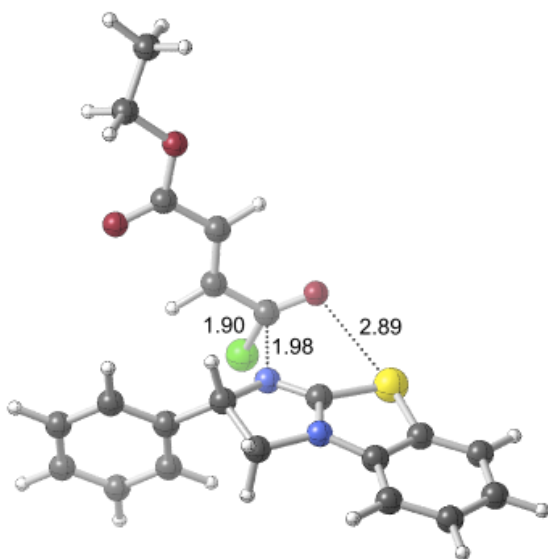

Charge = 0 Multiplicity = 1

HF = -2004.7265389 hartrees (-1257985.95042514 kcal/mol)

Imaginary Frequencies: 1 (-211.9153 1/cm)

Zero-point correction = 0.366867 (Hartree/Particle)

Temperature 298.150 Kelvin. Pressure 1.00000 Atm.

Sum of electronic and thermal Free Energies =

-2004.418503 hartrees (-1257792.65481753 kcal/mol)

Coordinates (from last standard orientation):

| Center Number | Atomic Number | Coordinates (Angstroms) |           |           |
|---------------|---------------|-------------------------|-----------|-----------|
|               |               | X                       | Y         | Z         |
| 1             | 6             | 4.559707                | -0.410702 | -1.948327 |
| 2             | 6             | 3.618700                | -0.601882 | -0.942296 |
| 3             | 6             | 3.902199                | -1.410750 | 0.169062  |
| 4             | 6             | 5.123726                | -2.057076 | 0.284853  |
| 5             | 6             | 6.070459                | -1.868125 | -0.723074 |
| 6             | 6             | 5.789556                | -1.053841 | -1.821812 |
| 7             | 1             | 4.331335                | 0.217803  | -2.803138 |
| 8             | 1             | 5.341674                | -2.686043 | 1.142434  |
| 9             | 1             | 7.034590                | -2.359678 | -0.645840 |
| 10            | 1             | 6.539308                | -0.917268 | -2.594496 |
| 11            | 6             | 1.654749                | -0.365836 | 0.272716  |
| 12            | 16            | 2.531186                | -1.480526 | 1.301619  |

|    |    |           |           |           |
|----|----|-----------|-----------|-----------|
| 13 | 7  | 2.333643  | -0.089462 | -0.873726 |
| 14 | 6  | 1.639340  | 0.984536  | -1.581092 |
| 15 | 1  | 2.165679  | 1.933794  | -1.428453 |
| 16 | 1  | 1.556460  | 0.774002  | -2.648254 |
| 17 | 6  | 0.257817  | 0.959748  | -0.857679 |
| 18 | 7  | 0.525020  | 0.239848  | 0.415058  |
| 19 | 6  | -0.343474 | 2.329822  | -0.655021 |
| 20 | 6  | -1.494154 | 2.692866  | -1.355070 |
| 21 | 6  | 0.251334  | 3.250751  | 0.212246  |
| 22 | 6  | -2.043346 | 3.965227  | -1.199794 |
| 23 | 1  | -1.965725 | 1.972168  | -2.019250 |
| 24 | 6  | -0.298363 | 4.518923  | 0.371728  |
| 25 | 1  | 1.138909  | 2.966413  | 0.772248  |
| 26 | 6  | -1.445547 | 4.879253  | -0.336773 |
| 27 | 1  | -2.939561 | 4.236456  | -1.749487 |
| 28 | 1  | 0.164266  | 5.226670  | 1.053191  |
| 29 | 1  | -1.874419 | 5.868841  | -0.209985 |
| 30 | 1  | -0.443799 | 0.349687  | -1.441078 |
| 31 | 6  | -0.710020 | -0.516679 | 1.767721  |
| 32 | 6  | -1.936313 | -0.331476 | 0.942140  |
| 33 | 6  | -2.663757 | -1.386669 | 0.583184  |
| 34 | 6  | -3.873806 | -1.189375 | -0.256890 |
| 35 | 6  | -5.699015 | -2.271687 | -1.273391 |
| 36 | 6  | -6.284058 | -3.663371 | -1.337220 |
| 37 | 1  | -2.203876 | 0.678990  | 0.646580  |
| 38 | 1  | -6.390171 | -1.556195 | -0.818810 |
| 39 | 1  | -5.422517 | -1.895965 | -2.263245 |
| 40 | 1  | -6.548943 | -4.017542 | -0.337043 |
| 41 | 1  | -7.189109 | -3.653520 | -1.950859 |
| 42 | 1  | -5.571665 | -4.364736 | -1.780516 |
| 43 | 1  | -2.402758 | -2.395905 | 0.885811  |
| 44 | 8  | -0.233949 | -1.560660 | 2.123255  |
| 45 | 8  | -4.240505 | -0.124946 | -0.705384 |
| 46 | 8  | -4.510820 | -2.344314 | -0.462479 |
| 47 | 17 | -0.611854 | 0.927949  | 3.002384  |

*Product:*

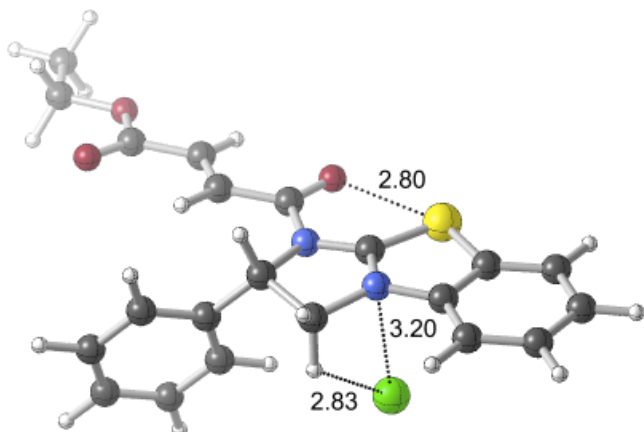

Charge = 0 Multiplicity = 1

HF = -2004.7674034 hartrees (-1258011.59330753 kcal/mol)

Imaginary Frequencies: none found

Zero-point correction = 0.369358 (Hartree/Particle)

Temperature 298.150 Kelvin. Pressure 1.00000 Atm.

Sum of electronic and thermal Free Energies =

-2004.458009 hartrees (-1257817.44522759 kcal/mol)

Coordinates (from last standard orientation):

atom 47 is isolated, type=Cl

| Center<br>Number | Atomic<br>Number | Coordinates (Angstroms) |           |           |
|------------------|------------------|-------------------------|-----------|-----------|
|                  |                  | X                       | Y         | Z         |
| 1                | 6                | 4.968076                | 0.506345  | -0.972001 |
| 2                | 6                | 3.837681                | -0.226767 | -0.625492 |
| 3                | 6                | 3.929947                | -1.507647 | -0.067999 |
| 4                | 6                | 5.170030                | -2.099315 | 0.149735  |
| 5                | 6                | 6.303535                | -1.371506 | -0.194842 |
| 6                | 6                | 6.203022                | -0.086036 | -0.744257 |
| 7                | 1                | 4.875312                | 1.501290  | -1.394426 |
| 8                | 1                | 5.250813                | -3.090896 | 0.582818  |
| 9                | 1                | 7.283033                | -1.808010 | -0.030072 |
| 10               | 1                | 7.106452                | 0.459360  | -0.996033 |
| 11               | 6                | 1.641523                | -0.729392 | -0.307411 |
| 12               | 16               | 2.333027                | -2.175298 | 0.290600  |
| 13               | 7                | 2.508464                | 0.145384  | -0.777523 |
| 14               | 6                | 1.864146                | 1.430251  | -1.055253 |

|    |    |           |           |           |
|----|----|-----------|-----------|-----------|
| 15 | 1  | 2.082110  | 2.094605  | -0.213310 |
| 16 | 1  | 2.212824  | 1.849128  | -1.998701 |
| 17 | 6  | 0.362350  | 1.038406  | -1.106831 |
| 18 | 7  | 0.366245  | -0.293207 | -0.412090 |
| 19 | 6  | -0.538433 | 2.065267  | -0.464819 |
| 20 | 6  | -1.368486 | 2.842715  | -1.273629 |
| 21 | 6  | -0.530744 | 2.252798  | 0.919594  |
| 22 | 6  | -2.189727 | 3.812088  | -0.701695 |
| 23 | 1  | -1.376697 | 2.683320  | -2.349387 |
| 24 | 6  | -1.359495 | 3.217186  | 1.485875  |
| 25 | 1  | 0.137024  | 1.656364  | 1.541044  |
| 26 | 6  | -2.188186 | 3.997034  | 0.678874  |
| 27 | 1  | -2.834486 | 4.415097  | -1.333616 |
| 28 | 1  | -1.355647 | 3.361672  | 2.562122  |
| 29 | 1  | -2.833837 | 4.746812  | 1.126494  |
| 30 | 1  | 0.057585  | 0.862650  | -2.143065 |
| 31 | 6  | -0.699828 | -1.134672 | -0.085313 |
| 32 | 6  | -2.061485 | -0.655405 | -0.414817 |
| 33 | 6  | -3.116138 | -1.363041 | -0.010429 |
| 34 | 6  | -4.488954 | -0.896531 | -0.355779 |
| 35 | 6  | -6.782628 | -1.349797 | -0.118533 |
| 36 | 6  | -7.659461 | -2.400665 | 0.520158  |
| 37 | 1  | -2.197845 | 0.255799  | -0.987315 |
| 38 | 1  | -6.961361 | -0.355038 | 0.299858  |
| 39 | 1  | -6.925663 | -1.296518 | -1.201660 |
| 40 | 1  | -7.490721 | -2.442760 | 1.599642  |
| 41 | 1  | -8.710163 | -2.155149 | 0.342349  |
| 42 | 1  | -7.457755 | -3.386877 | 0.092996  |
| 43 | 1  | -3.010621 | -2.273056 | 0.572359  |
| 44 | 8  | -0.463024 | -2.213467 | 0.424781  |
| 45 | 8  | -4.732399 | 0.094861  | -1.006469 |
| 46 | 8  | -5.412461 | -1.715035 | 0.144315  |
| 47 | 17 | 2.457697  | 0.904880  | 2.327868  |

*Acylammonium formation between ethyl fumaroyl chloride (5) and pyridine:*

*Reactant:*

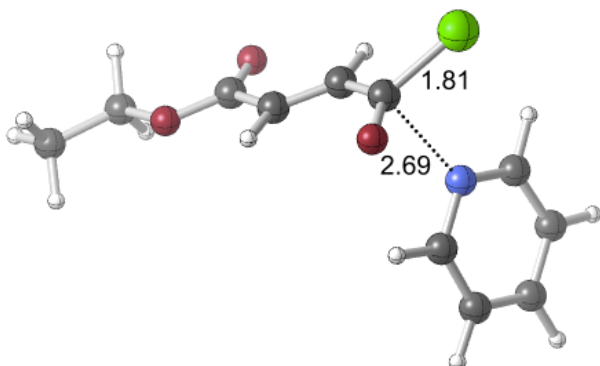

Charge = 0 Multiplicity = 1

HF = -1166.6946578 hartrees (-732112.564716078 kcal/mol)

Imaginary Frequencies: none found

Zero-point correction = 0.217776 (Hartree/Particle)

Temperature 298.150 Kelvin. Pressure 1.00000 Atm.

Sum of electronic and thermal Free Energies =

-1166.525651 hartrees (-732006.51125901 kcal/mol)

Coordinates (from last standard orientation):

| Center Number | Atomic Number | Coordinates (Angstroms) |           |           |
|---------------|---------------|-------------------------|-----------|-----------|
|               |               | X                       | Y         | Z         |
| 1             | 6             | 0.708752                | 1.798313  | 0.607036  |
| 2             | 6             | -0.332224               | 1.152919  | -0.223175 |
| 3             | 6             | -1.431804               | 0.680994  | 0.363521  |
| 4             | 6             | -2.501686               | 0.064084  | -0.468005 |
| 5             | 6             | -4.633268               | -0.926498 | -0.418989 |
| 6             | 6             | -5.682644               | -1.281518 | 0.607738  |
| 7             | 1             | -0.183860               | 1.107588  | -1.296433 |
| 8             | 1             | -5.004888               | -0.207767 | -1.155227 |
| 9             | 1             | -4.267343               | -1.806950 | -0.955388 |
| 10            | 1             | -6.025506               | -0.387819 | 1.136557  |
| 11            | 1             | -6.541068               | -1.739906 | 0.108936  |
| 12            | 1             | -5.286783               | -1.992575 | 1.338164  |
| 13            | 1             | -1.584683               | 0.740382  | 1.436813  |
| 14            | 8             | 0.835484                | 1.735716  | 1.786843  |
| 15            | 8             | -2.451887               | -0.060933 | -1.671024 |
| 16            | 8             | -3.527671               | -0.328082 | 0.286741  |

|    |    |          |           |           |
|----|----|----------|-----------|-----------|
| 17 | 17 | 1.771965 | 2.894914  | -0.355258 |
| 18 | 6  | 2.129871 | -1.168586 | 1.009448  |
| 19 | 6  | 2.891876 | -2.329386 | 1.107584  |
| 20 | 6  | 3.705069 | -2.679376 | 0.033490  |
| 21 | 6  | 3.724359 | -1.856699 | -1.089084 |
| 22 | 6  | 2.925895 | -0.716332 | -1.089041 |
| 23 | 7  | 2.142355 | -0.374101 | -0.063315 |
| 24 | 1  | 4.314301 | -3.577467 | 0.070430  |
| 25 | 1  | 1.482110 | -0.855652 | 1.827621  |
| 26 | 1  | 2.847366 | -2.938516 | 2.004121  |
| 27 | 1  | 4.342327 | -2.090051 | -1.949606 |
| 28 | 1  | 2.915559 | -0.047207 | -1.947006 |

*Transition state (TS):*

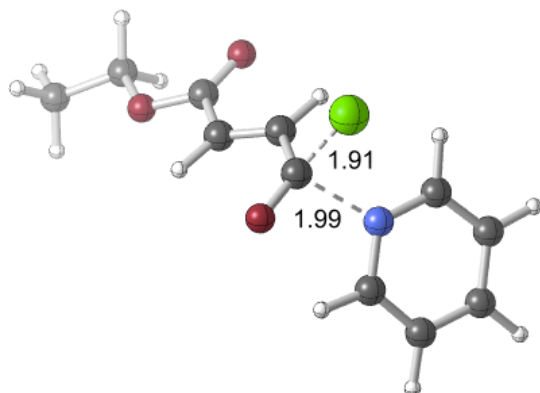

Charge = 0 Multiplicity = 1

HF = -1166.6889739 hartrees (-732108.998011989 kcal/mol)

Imaginary Frequencies: 1 (-149.0531 1/cm)

Zero-point correction = 0.217993 (Hartree/Particle)

Temperature 298.150 Kelvin. Pressure 1.00000 Atm.

Sum of electronic and thermal Free Energies =

-1166.516493 hartrees (-732000.76452243 kcal/mol)

Coordinates (from last standard orientation):

| Center Number | Atomic Number | Coordinates (Angstroms) |          |           |
|---------------|---------------|-------------------------|----------|-----------|
|               |               | X                       | Y        | Z         |
| 1             | 6             | 0.868671                | 1.253407 | 0.588388  |
| 2             | 6             | -0.270005               | 0.747059 | -0.229682 |
| 3             | 6             | -1.436745               | 0.494813 | 0.359021  |

|    |    |           |           |           |
|----|----|-----------|-----------|-----------|
| 4  | 6  | -2.580762 | -0.003900 | -0.447987 |
| 5  | 6  | -4.812764 | -0.740860 | -0.352224 |
| 6  | 6  | -5.858413 | -1.017510 | 0.702580  |
| 7  | 1  | -0.120469 | 0.604874  | -1.295713 |
| 8  | 1  | -5.145965 | 0.012254  | -1.072849 |
| 9  | 1  | -4.539510 | -1.644043 | -0.905392 |
| 10 | 1  | -6.110005 | -0.104545 | 1.249452  |
| 11 | 1  | -6.766711 | -1.397882 | 0.227084  |
| 12 | 1  | -5.500581 | -1.766052 | 1.415138  |
| 13 | 1  | -1.583899 | 0.642897  | 1.424257  |
| 14 | 8  | 0.897262  | 1.358637  | 1.781921  |
| 15 | 8  | -2.561273 | -0.177207 | -1.646635 |
| 16 | 8  | -3.642920 | -0.243461 | 0.324399  |
| 17 | 17 | 1.750922  | 2.610327  | -0.430519 |
| 18 | 6  | 2.543287  | -0.878999 | 1.193980  |
| 19 | 6  | 3.427043  | -1.946641 | 1.089171  |
| 20 | 6  | 3.893189  | -2.300219 | -0.173132 |
| 21 | 6  | 3.466917  | -1.576873 | -1.285148 |
| 22 | 6  | 2.584338  | -0.522664 | -1.094064 |
| 23 | 7  | 2.144317  | -0.198455 | 0.123743  |
| 24 | 1  | 4.585255  | -3.128169 | -0.290668 |
| 25 | 1  | 2.140269  | -0.537273 | 2.144764  |
| 26 | 1  | 3.737424  | -2.483471 | 1.978483  |
| 27 | 1  | 3.810039  | -1.819684 | -2.284505 |
| 28 | 1  | 2.225170  | 0.085292  | -1.920321 |



*Product:*

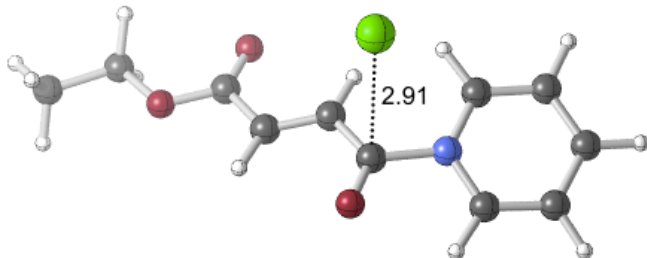

Charge = 0 Multiplicity = 1

HF = -1166.7014384 hartrees (-732116.819610384 kcal/mol)

Imaginary Frequencies: none found

Zero-point correction = 0.220157 (Hartree/Particle)

Temperature 298.150 Kelvin. Pressure 1.00000 Atm.

Sum of electronic and thermal Free Energies =

-1166.527748 hartrees (-732007.82714748 kcal/mol)

Coordinates (from last standard orientation):

atom 17 is isolated, type=Cl

| Center Number | Atomic Number | Coordinates (Angstroms) |           |           |
|---------------|---------------|-------------------------|-----------|-----------|
|               |               | X                       | Y         | Z         |
| 1             | 6             | 0.881273                | -0.311717 | 0.840776  |
| 2             | 6             | -0.281936               | -0.195798 | -0.061075 |
| 3             | 6             | -1.505205               | -0.363075 | 0.442767  |
| 4             | 6             | -2.679946               | -0.287966 | -0.467747 |
| 5             | 6             | -5.027766               | -0.253099 | -0.570380 |
| 6             | 6             | -6.193772               | -0.290489 | 0.388786  |
| 7             | 1             | -0.148957               | -0.032387 | -1.123378 |
| 8             | 1             | -4.997602               | 0.677937  | -1.143558 |
| 9             | 1             | -5.048234               | -1.088629 | -1.276441 |
| 10            | 1             | -6.143378               | 0.544841  | 1.092603  |
| 11            | 1             | -7.129691               | -0.215345 | -0.171932 |
| 12            | 1             | -6.203097               | -1.226403 | 0.954257  |
| 13            | 1             | -1.678674               | -0.530282 | 1.501159  |
| 14            | 8             | 0.842400                | -0.513396 | 2.018776  |
| 15            | 8             | -2.608184               | -0.185262 | -1.672405 |
| 16            | 8             | -3.822250               | -0.345885 | 0.214949  |
| 17            | 17            | 1.105480                | 2.560580  | 0.460337  |
| 18            | 6             | 3.171763                | -1.105114 | 0.852925  |
| 19            | 6             | 4.433859                | -1.257757 | 0.319455  |

|    |   |          |           |           |
|----|---|----------|-----------|-----------|
| 20 | 6 | 4.716801 | -0.691544 | -0.921627 |
| 21 | 6 | 3.727203 | 0.021400  | -1.593040 |
| 22 | 6 | 2.479994 | 0.153854  | -1.017351 |
| 23 | 7 | 2.224553 | -0.417609 | 0.179388  |
| 24 | 1 | 5.703258 | -0.801138 | -1.359804 |
| 25 | 1 | 2.869604 | -1.510242 | 1.810131  |
| 26 | 1 | 5.178294 | -1.815788 | 0.873894  |
| 27 | 1 | 3.913731 | 0.490628  | -2.551191 |
| 28 | 1 | 1.690366 | 0.744388  | -1.458701 |

*Acylammonium formation between ethyl fumaroyl chloride (5) and 2,6-lutidine:*

*Reactant:*

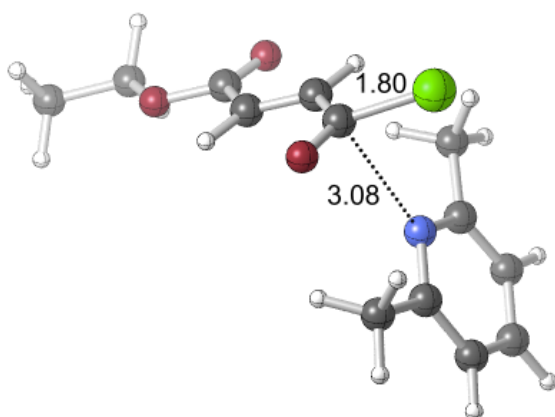

Charge = 0 Multiplicity = 1

HF = -1245.2952046 hartrees (-781435.193838546 kcal/mol)

Imaginary Frequencies: none found

Zero-point correction = 0.273816 (Hartree/Particle)

Temperature 298.150 Kelvin. Pressure 1.00000 Atm.

Sum of electronic and thermal Free Energies =

-1245.073343 hartrees (-781295.97346593 kcal/mol)

Coordinates (from last standard orientation):

| Center Number | Atomic Number | Coordinates (Angstroms) |           |           |
|---------------|---------------|-------------------------|-----------|-----------|
|               |               | X                       | Y         | Z         |
| 1             | 6             | -0.345275               | -2.206787 | 0.063153  |
| 2             | 6             | 0.666383                | -1.296443 | -0.513907 |
| 3             | 6             | 1.704399                | -0.918594 | 0.231724  |
| 4             | 6             | 2.712568                | 0.015192  | -0.341475 |

|    |    |           |           |           |
|----|----|-----------|-----------|-----------|
| 5  | 6  | 4.752913  | 1.114687  | 0.059510  |
| 6  | 6  | 5.807895  | 1.157591  | 1.139706  |
| 7  | 1  | 0.540835  | -0.959209 | -1.535928 |
| 8  | 1  | 5.148527  | 0.739717  | -0.888495 |
| 9  | 1  | 4.306983  | 2.097459  | -0.119486 |
| 10 | 1  | 6.233454  | 0.164190  | 1.306290  |
| 11 | 1  | 6.613268  | 1.832108  | 0.836145  |
| 12 | 1  | 5.386931  | 1.522822  | 2.080438  |
| 13 | 1  | 1.837569  | -1.260181 | 1.253713  |
| 14 | 8  | -0.360126 | -2.659582 | 1.162395  |
| 15 | 8  | 2.628136  | 0.525835  | -1.436990 |
| 16 | 8  | 3.715505  | 0.219098  | 0.509150  |
| 17 | 17 | -1.622926 | -2.672984 | -1.111808 |
| 18 | 6  | -2.604627 | 0.572900  | 1.174039  |
| 19 | 6  | -3.583690 | 1.560013  | 1.310622  |
| 20 | 6  | -3.723092 | 2.509662  | 0.306132  |
| 21 | 6  | -2.879370 | 2.449328  | -0.796667 |
| 22 | 6  | -1.923905 | 1.432126  | -0.860015 |
| 23 | 7  | -1.794168 | 0.513055  | 0.108013  |
| 24 | 1  | -4.476142 | 3.288858  | 0.383983  |
| 25 | 1  | -4.218222 | 1.574493  | 2.190895  |
| 26 | 1  | -2.952887 | 3.174829  | -1.600684 |
| 27 | 6  | -0.980763 | 1.324170  | -2.027637 |
| 28 | 1  | -1.126348 | 0.371205  | -2.548904 |
| 29 | 1  | -1.140704 | 2.134227  | -2.743251 |
| 30 | 1  | 0.060544  | 1.358650  | -1.688700 |
| 31 | 6  | -2.412972 | -0.480748 | 2.230369  |
| 32 | 1  | -2.687682 | -1.468378 | 1.844388  |
| 33 | 1  | -1.362758 | -0.530852 | 2.533359  |
| 34 | 1  | -3.025351 | -0.271975 | 3.111117  |

Transition state (TS):

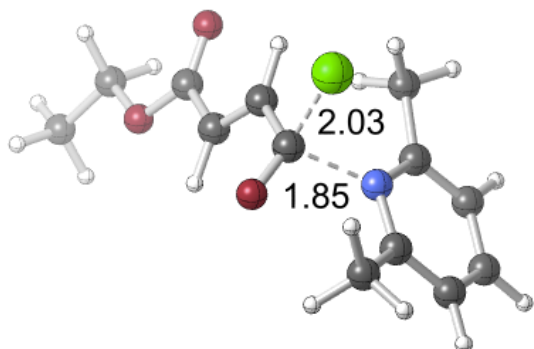

Charge = 0 Multiplicity = 1

HF = -1245.2722364 hartrees (-781420.781063364 kcal/mol)

Imaginary Frequencies: 1 (-238.9462 1/cm)

Zero-point correction = 0.274824 (Hartree/Particle)

Temperature 298.150 Kelvin. Pressure 1.00000 Atm.

Sum of electronic and thermal Free Energies =

-1245.045606 hartrees (-781278.56822106 kcal/mol)

Coordinates (from last standard orientation):

| Center<br>Number | Atomic<br>Number | Coordinates (Angstroms) |           |           |
|------------------|------------------|-------------------------|-----------|-----------|
|                  |                  | X                       | Y         | Z         |
| 1                | 6                | -0.777521               | -1.223493 | 0.334995  |
| 2                | 6                | 0.533371                | -0.946159 | -0.340662 |
| 3                | 6                | 1.536939                | -0.455485 | 0.383642  |
| 4                | 6                | 2.846067                | -0.199922 | -0.271674 |
| 5                | 6                | 5.066440                | 0.491757  | 0.081244  |
| 6                | 6                | 5.923387                | 0.974001  | 1.228107  |
| 7                | 1                | 0.667608                | -1.195354 | -1.385202 |
| 8                | 1                | 5.462406                | -0.422713 | -0.370203 |
| 9                | 1                | 4.970007                | 1.245853  | -0.705286 |
| 10               | 1                | 5.996403                | 0.209483  | 2.006559  |
| 11               | 1                | 6.930836                | 1.194028  | 0.863930  |
| 12               | 1                | 5.507478                | 1.884930  | 1.667648  |
| 13               | 1                | 1.434395                | -0.228240 | 1.439938  |
| 14               | 8                | -0.842846               | -1.504922 | 1.498771  |
| 15               | 8                | 3.063500                | -0.335925 | -1.456286 |
| 16               | 8                | 3.756999                | 0.211273  | 0.612216  |
| 17               | 17               | -1.754503               | -2.489180 | -0.915799 |

|    |   |           |           |           |
|----|---|-----------|-----------|-----------|
| 18 | 6 | -2.839645 | 0.430625  | 0.924420  |
| 19 | 6 | -3.495100 | 1.659148  | 0.991445  |
| 20 | 6 | -3.180496 | 2.669160  | 0.097932  |
| 21 | 6 | -2.264940 | 2.398119  | -0.906877 |
| 22 | 6 | -1.628048 | 1.160501  | -0.954002 |
| 23 | 7 | -1.868453 | 0.231866  | 0.001568  |
| 24 | 1 | -3.674229 | 3.634179  | 0.154401  |
| 25 | 1 | -4.263497 | 1.794589  | 1.744730  |
| 26 | 1 | -2.043619 | 3.126951  | -1.678750 |
| 27 | 6 | -0.740792 | 0.860278  | -2.131918 |
| 28 | 1 | -0.883764 | -0.166013 | -2.478477 |
| 29 | 1 | -1.014117 | 1.535039  | -2.946226 |
| 30 | 1 | 0.318747  | 1.016882  | -1.912758 |
| 31 | 6 | -3.311680 | -0.667138 | 1.844107  |
| 32 | 1 | -3.267623 | -1.643914 | 1.362594  |
| 33 | 1 | -2.717385 | -0.718500 | 2.758280  |
| 34 | 1 | -4.347028 | -0.445958 | 2.114277  |

*Product:*

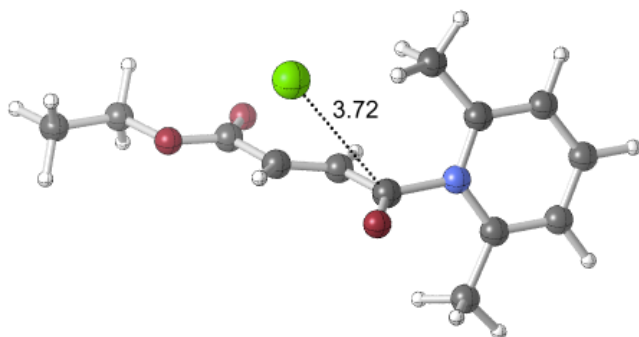

Charge = 0 Multiplicity = 1

HF = -1245.2926707 hartrees (-781433.603790957 kcal/mol)

Imaginary Frequencies: none found

Zero-point correction = 0.275979 (Hartree/Particle)

Temperature 298.150 Kelvin. Pressure 1.00000 Atm.

Sum of electronic and thermal Free Energies =

-1245.066450 hartrees (-781291.6480395 kcal/mol)

Coordinates (from last standard orientation):  
atom 17 is isolated, type=Cl

| Center<br>Number | Atomic<br>Number | Coordinates (Angstroms) |           |           |
|------------------|------------------|-------------------------|-----------|-----------|
|                  |                  | X                       | Y         | Z         |
| 1                | 6                | -0.923356               | 0.162442  | 0.786778  |
| 2                | 6                | 0.187117                | 0.626700  | -0.050039 |
| 3                | 6                | 1.436646                | 0.358831  | 0.337653  |
| 4                | 6                | 2.577644                | 0.794854  | -0.520605 |
| 5                | 6                | 4.919139                | 0.900937  | -0.686591 |
| 6                | 6                | 6.118921                | 0.562847  | 0.166143  |
| 7                | 1                | -0.032984               | 1.138086  | -0.982637 |
| 8                | 1                | 4.916696                | 0.349250  | -1.631145 |
| 9                | 1                | 4.862752                | 1.969723  | -0.913073 |
| 10               | 1                | 6.142387                | -0.505829 | 0.395614  |
| 11               | 1                | 7.033391                | 0.822784  | -0.374415 |
| 12               | 1                | 6.098738                | 1.124162  | 1.104308  |
| 13               | 1                | 1.645654                | -0.203753 | 1.241127  |
| 14               | 8                | -0.892262               | -0.202541 | 1.922640  |
| 15               | 8                | 2.451661                | 1.329446  | -1.599775 |
| 16               | 8                | 3.742716                | 0.527663  | 0.059706  |
| 17               | 17               | 1.185423                | -2.896642 | 0.855859  |
| 18               | 6                | -3.184315               | 1.083279  | 0.554885  |
| 19               | 6                | -4.433927               | 1.089747  | -0.039855 |
| 20               | 6                | -4.722551               | 0.187815  | -1.058737 |
| 21               | 6                | -3.754044               | -0.711727 | -1.482316 |
| 22               | 6                | -2.497021               | -0.708190 | -0.894761 |
| 23               | 7                | -2.261477               | 0.189147  | 0.101319  |
| 24               | 1                | -5.704761               | 0.186451  | -1.520398 |
| 25               | 1                | -5.171196               | 1.802936  | 0.309448  |
| 26               | 1                | -3.953682               | -1.429741 | -2.268976 |
| 27               | 6                | -1.407947               | -1.642372 | -1.315821 |
| 28               | 1                | -0.822959               | -2.037602 | -0.473700 |
| 29               | 1                | -1.853731               | -2.478567 | -1.857724 |
| 30               | 1                | -0.713071               | -1.133229 | -1.994088 |
| 31               | 6                | -2.816268               | 2.014784  | 1.667801  |
| 32               | 1                | -2.744017               | 1.471674  | 2.614346  |
| 33               | 1                | -1.855470               | 2.505618  | 1.484890  |
| 34               | 1                | -3.586757               | 2.780694  | 1.759815  |

*Acylammonium formation between ethyl fumaroyl chloride (5) and DTBP:*

*Reactant:*

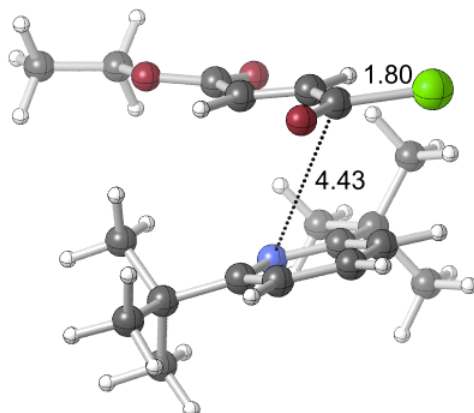

Charge = 0 Multiplicity = 1

HF = -1481.0665023 hartrees (-929384.040858273 kcal/mol)

Imaginary Frequencies: none found

Zero-point correction = 0.445172 (Hartree/Particle)

Temperature 298.150 Kelvin. Pressure 1.00000 Atm.

Sum of electronic and thermal Free Energies =

-1480.678568 hartrees (-929140.60820568 kcal/mol)

Coordinates (from last standard orientation):

| Center Number | Atomic Number | Coordinates (Angstroms) |          |           |
|---------------|---------------|-------------------------|----------|-----------|
|               |               | X                       | Y        | Z         |
| 1             | 6             | 2.062780                | 2.142789 | 0.994814  |
| 2             | 6             | 1.137393                | 1.902124 | -0.130945 |
| 3             | 6             | -0.177804               | 1.928220 | 0.092299  |
| 4             | 6             | -1.115599               | 1.705143 | -1.045816 |
| 5             | 6             | -3.366897               | 1.790545 | -1.719134 |
| 6             | 6             | -4.704846               | 2.126845 | -1.104774 |
| 7             | 1             | 1.553065                | 1.719108 | -1.115814 |
| 8             | 1             | -3.139803               | 2.419184 | -2.585131 |
| 9             | 1             | -3.308767               | 0.743369 | -2.031342 |
| 10            | 1             | -4.730150               | 3.169415 | -0.775793 |
| 11            | 1             | -5.493910               | 1.978284 | -1.847136 |
| 12            | 1             | -4.910962               | 1.480875 | -0.246285 |
| 13            | 1             | -0.594150               | 2.134983 | 1.074346  |
| 14            | 8             | 1.789131                | 2.346691 | 2.132793  |
| 15            | 8             | -0.779984               | 1.310951 | -2.140674 |

|    |    |           |           |           |
|----|----|-----------|-----------|-----------|
| 16 | 8  | -2.362436 | 2.021420  | -0.710485 |
| 17 | 17 | 3.792407  | 2.121224  | 0.480116  |
| 18 | 6  | -0.364692 | -1.269019 | 1.362433  |
| 19 | 6  | 0.720365  | -0.923390 | 2.166622  |
| 20 | 6  | 1.991230  | -0.887691 | 1.593979  |
| 21 | 6  | 2.139773  | -1.182810 | 0.248688  |
| 22 | 6  | 0.998374  | -1.511309 | -0.502770 |
| 23 | 7  | -0.212220 | -1.541974 | 0.052404  |
| 24 | 1  | 2.856289  | -0.628451 | 2.199412  |
| 25 | 1  | 0.591496  | -0.696547 | 3.218349  |
| 26 | 1  | 3.122421  | -1.174049 | -0.212857 |
| 27 | 6  | 1.135571  | -1.902879 | -1.975282 |
| 28 | 6  | -1.785524 | -1.442105 | 1.901943  |
| 29 | 6  | -0.231564 | -2.152868 | -2.613703 |
| 30 | 1  | -0.858786 | -1.257671 | -2.560617 |
| 31 | 1  | -0.095853 | -2.418413 | -3.668307 |
| 32 | 1  | -0.762876 | -2.971190 | -2.118504 |
| 33 | 6  | 1.970438  | -3.192839 | -2.054933 |
| 34 | 1  | 2.064408  | -3.513328 | -3.098888 |
| 35 | 1  | 2.980139  | -3.046618 | -1.656143 |
| 36 | 1  | 1.495198  | -4.003610 | -1.491267 |
| 37 | 6  | -2.180503 | -2.916413 | 1.718771  |
| 38 | 1  | -1.499933 | -3.575810 | 2.269545  |
| 39 | 1  | -3.196326 | -3.082378 | 2.095307  |
| 40 | 1  | -2.150679 | -3.197764 | 0.661914  |
| 41 | 6  | -1.889678 | -1.078894 | 3.384281  |
| 42 | 1  | -1.597353 | -0.038472 | 3.567298  |
| 43 | 1  | -2.926430 | -1.197567 | 3.717102  |
| 44 | 1  | -1.264388 | -1.727375 | 4.007741  |
| 45 | 6  | -2.751754 | -0.557817 | 1.103333  |
| 46 | 1  | -2.563219 | 0.503136  | 1.295768  |
| 47 | 1  | -2.647747 | -0.738135 | 0.028130  |
| 48 | 1  | -3.785940 | -0.777096 | 1.394181  |
| 49 | 6  | 1.850169  | -0.788493 | -2.755589 |
| 50 | 1  | 2.828834  | -0.548310 | -2.325333 |
| 51 | 1  | 2.013782  | -1.109277 | -3.791227 |
| 52 | 1  | 1.239183  | 0.119392  | -2.771634 |



Transition state (TS):

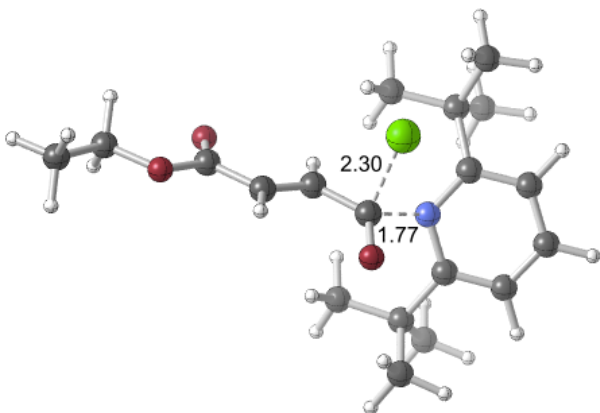

Charge = 0 Multiplicity = 1

HF = -1481.0001713 hartrees (-929342.417492463 kcal/mol)

Imaginary Frequencies: 1 (-232.4717 1/cm)

Zero-point correction = 0.445757 (Hartree/Particle)

Temperature 298.150 Kelvin. Pressure 1.00000 Atm.

Sum of electronic and thermal Free Energies =

-1480.609899 hartrees (-929097.51772149 kcal/mol)

Coordinates (from last standard orientation):

atom 17 is isolated, type=Cl

| Center Number | Atomic Number | Coordinates (Angstroms) |           |           |
|---------------|---------------|-------------------------|-----------|-----------|
|               |               | X                       | Y         | Z         |
| 1             | 6             | -0.020012               | 0.261614  | -0.808756 |
| 2             | 6             | -1.199251               | -0.074500 | 0.030128  |
| 3             | 6             | -2.419489               | 0.161775  | -0.448790 |
| 4             | 6             | -3.596133               | -0.128174 | 0.410146  |
| 5             | 6             | -5.945145               | -0.108974 | 0.514245  |
| 6             | 6             | -7.107235               | 0.254588  | -0.379933 |
| 7             | 1             | -1.057173               | -0.454395 | 1.030239  |
| 8             | 1             | -5.962673               | -1.164554 | 0.800704  |
| 9             | 1             | -5.927504               | 0.491235  | 1.428613  |
| 10            | 1             | -7.101125               | -0.350628 | -1.290592 |
| 11            | 1             | -8.046539               | 0.073514  | 0.150119  |
| 12            | 1             | -7.066644               | 1.310893  | -0.660260 |
| 13            | 1             | -2.591307               | 0.543039  | -1.450271 |
| 14            | 8             | 0.047819                | 1.125152  | -1.621404 |
| 15            | 8             | -3.537502               | -0.556401 | 1.542283  |

|    |    |           |           |           |
|----|----|-----------|-----------|-----------|
| 16 | 8  | -4.736511 | 0.145565  | -0.226635 |
| 17 | 17 | 0.117559  | -1.687410 | -2.020787 |
| 18 | 6  | 2.167395  | 1.352775  | -0.077982 |
| 19 | 6  | 3.479419  | 1.420110  | -0.519810 |
| 20 | 6  | 4.168510  | 0.251348  | -0.814055 |
| 21 | 6  | 3.595408  | -0.958662 | -0.468424 |
| 22 | 6  | 2.286890  | -1.016203 | 0.010653  |
| 23 | 7  | 1.540535  | 0.134851  | 0.017240  |
| 24 | 1  | 5.170359  | 0.289829  | -1.230398 |
| 25 | 1  | 3.959879  | 2.384440  | -0.632763 |
| 26 | 1  | 4.173464  | -1.871673 | -0.535680 |
| 27 | 6  | 1.888769  | -2.308494 | 0.749817  |
| 28 | 6  | 1.510773  | 2.657443  | 0.413523  |
| 29 | 6  | 2.830733  | -2.310900 | 1.984056  |
| 30 | 1  | 2.698752  | -1.400822 | 2.580255  |
| 31 | 1  | 2.584998  | -3.172621 | 2.613668  |
| 32 | 1  | 3.882935  | -2.386105 | 1.695864  |
| 33 | 6  | 2.159668  | -3.579074 | -0.068733 |
| 34 | 1  | 1.974299  | -4.448280 | 0.571723  |
| 35 | 1  | 1.497075  | -3.633339 | -0.934404 |
| 36 | 1  | 3.195153  | -3.646087 | -0.414099 |
| 37 | 6  | 2.436113  | 3.161786  | 1.548747  |
| 38 | 1  | 3.453845  | 3.359761  | 1.203399  |
| 39 | 1  | 2.028306  | 4.096368  | 1.947493  |
| 40 | 1  | 2.485250  | 2.433937  | 2.366301  |
| 41 | 6  | 1.458146  | 3.718215  | -0.694739 |
| 42 | 1  | 0.821327  | 3.389693  | -1.519314 |
| 43 | 1  | 1.044001  | 4.645033  | -0.282840 |
| 44 | 1  | 2.452786  | 3.945461  | -1.090713 |
| 45 | 6  | 0.118629  | 2.504718  | 1.036119  |
| 46 | 1  | -0.671075 | 2.434126  | 0.287874  |
| 47 | 1  | 0.063699  | 1.638111  | 1.705067  |
| 48 | 1  | -0.087389 | 3.395700  | 1.637434  |
| 49 | 6  | 0.468244  | -2.368567 | 1.302714  |
| 50 | 1  | -0.283563 | -2.412710 | 0.514226  |
| 51 | 1  | 0.378163  | -3.281539 | 1.900602  |
| 52 | 1  | 0.269419  | -1.525827 | 1.972951  |

Product:

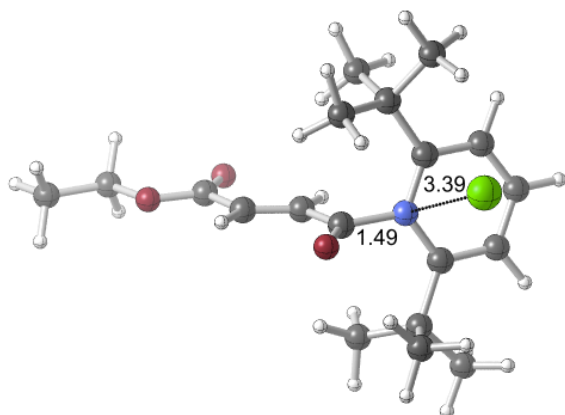

Charge = 0 Multiplicity = 1

HF = -1481.0337097 hartrees (-929363.463173847 kcal/mol)

Imaginary Frequencies: none found

Zero-point correction = 0.448553 (Hartree/Particle)

Temperature 298.150 Kelvin. Pressure 1.00000 Atm.

Sum of electronic and thermal Free Energies =

-1480.640709 hartrees (-929116.85130459 kcal/mol)

Coordinates (from last standard orientation):

atom 17 is isolated, type=Cl

| Center<br>Number | Atomic<br>Number | Coordinates (Angstroms) |           |           |
|------------------|------------------|-------------------------|-----------|-----------|
|                  |                  | X                       | Y         | Z         |
| 1                | 6                | -0.007259               | 0.294015  | -0.601445 |
| 2                | 6                | -1.252989               | 0.225290  | 0.194328  |
| 3                | 6                | -2.434472               | 0.195735  | -0.424172 |
| 4                | 6                | -3.683429               | 0.099101  | 0.386808  |
| 5                | 6                | -6.032758               | 0.073190  | 0.288251  |
| 6                | 6                | -7.109061               | 0.167255  | -0.767005 |
| 7                | 1                | -1.177714               | 0.195087  | 1.277513  |
| 8                | 1                | -6.071111               | -0.874185 | 0.833799  |
| 9                | 1                | -6.092697               | 0.889857  | 1.013419  |
| 10               | 1                | -7.013915               | -0.645285 | -1.492495 |
| 11               | 1                | -8.091289               | 0.093834  | -0.292293 |
| 12               | 1                | -7.050185               | 1.121473  | -1.297544 |
| 13               | 1                | -2.520154               | 0.227691  | -1.506863 |
| 14               | 8                | 0.073316                | 0.494437  | -1.774800 |
| 15               | 8                | -3.702741               | -0.020710 | 1.590947  |

|    |    |           |           |           |
|----|----|-----------|-----------|-----------|
| 16 | 8  | -4.760624 | 0.157316  | -0.388891 |
| 17 | 17 | 3.733184  | -1.034320 | -1.752138 |
| 18 | 6  | 1.920742  | 1.240135  | 0.591202  |
| 19 | 6  | 2.941885  | 1.071262  | 1.510658  |
| 20 | 6  | 3.225472  | -0.179344 | 2.039680  |
| 21 | 6  | 2.536192  | -1.284277 | 1.590070  |
| 22 | 6  | 1.535268  | -1.161388 | 0.631210  |
| 23 | 7  | 1.220702  | 0.108685  | 0.222118  |
| 24 | 1  | 4.002976  | -0.288513 | 2.788651  |
| 25 | 1  | 3.515340  | 1.924409  | 1.837998  |
| 26 | 1  | 2.787720  | -2.262193 | 1.972200  |
| 27 | 6  | 0.827330  | -2.449599 | 0.145685  |
| 28 | 6  | 1.627579  | 2.639019  | 0.003612  |
| 29 | 6  | -0.276331 | -2.831804 | 1.150849  |
| 30 | 1  | -1.112950 | -2.127795 | 1.152113  |
| 31 | 1  | -0.670328 | -3.815667 | 0.874081  |
| 32 | 1  | 0.123949  | -2.899414 | 2.167960  |
| 33 | 6  | 1.872868  | -3.589033 | 0.141259  |
| 34 | 1  | 1.415881  | -4.464999 | -0.326765 |
| 35 | 1  | 2.753908  | -3.296067 | -0.437571 |
| 36 | 1  | 2.174649  | -3.893202 | 1.146257  |
| 37 | 6  | 2.394641  | 3.705498  | 0.808653  |
| 38 | 1  | 3.478139  | 3.580664  | 0.738039  |
| 39 | 1  | 2.155799  | 4.683144  | 0.381829  |
| 40 | 1  | 2.101604  | 3.715331  | 1.863934  |
| 41 | 6  | 2.162399  | 2.707204  | -1.441314 |
| 42 | 1  | 1.691806  | 1.979038  | -2.102146 |
| 43 | 1  | 1.971991  | 3.712195  | -1.833655 |
| 44 | 1  | 3.242397  | 2.530880  | -1.455415 |
| 45 | 6  | 0.139858  | 3.052391  | 0.066180  |
| 46 | 1  | -0.467748 | 2.647580  | -0.743397 |
| 47 | 1  | -0.314128 | 2.786580  | 1.027278  |
| 48 | 1  | 0.088390  | 4.140757  | -0.029190 |
| 49 | 6  | 0.254430  | -2.406535 | -1.283913 |
| 50 | 1  | 0.981059  | -1.980936 | -1.982079 |
| 51 | 1  | 0.049790  | -3.437895 | -1.584502 |
| 52 | 1  | -0.696009 | -1.876741 | -1.361265 |

Acylammonium formation between ethyl fumaroyl chloride (5) and Et<sub>3</sub>N:

Reactant:

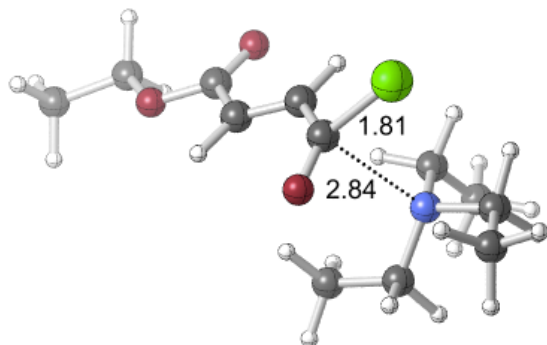

Charge = 0 Multiplicity = 1

HF = -1210.7783215 hartrees (-759775.504524465 kcal/mol)

Imaginary Frequencies: none found

Zero-point correction = 0.337212 (Hartree/Particle)

Temperature 298.150 Kelvin. Pressure 1.00000 Atm.

Sum of electronic and thermal Free Energies =

-1210.492958 hartrees (-759596.43607458 kcal/mol)

Coordinates (from last standard orientation):

| Center Number | Atomic Number | Coordinates (Angstroms) |           |           |
|---------------|---------------|-------------------------|-----------|-----------|
|               |               | X                       | Y         | Z         |
| 1             | 6             | -0.858953               | -1.703864 | 0.361891  |
| 2             | 6             | 0.290086                | -1.127550 | -0.366335 |
| 3             | 6             | 1.447018                | -0.939192 | 0.267639  |
| 4             | 6             | 2.593417                | -0.334996 | -0.466320 |
| 5             | 6             | 4.842605                | 0.330693  | -0.290078 |
| 6             | 6             | 5.940506                | 0.305754  | 0.747094  |
| 7             | 1             | 0.168670                | -0.889655 | -1.417675 |
| 8             | 1             | 5.107232                | -0.241942 | -1.183433 |
| 9             | 1             | 4.590594                | 1.349489  | -0.598719 |
| 10            | 1             | 6.169334                | -0.721201 | 1.045039  |
| 11            | 1             | 6.846442                | 0.754629  | 0.330508  |
| 12            | 1             | 5.649503                | 0.873665  | 1.635008  |
| 13            | 1             | 1.585087                | -1.198490 | 1.313129  |
| 14            | 8             | -1.021849               | -1.773919 | 1.536513  |
| 15            | 8             | 2.546319                | 0.053251  | -1.612290 |
| 16            | 8             | 3.674264                | -0.266072 | 0.308754  |

|    |    |           |           |           |
|----|----|-----------|-----------|-----------|
| 17 | 17 | -2.021418 | -2.509869 | -0.767227 |
| 18 | 7  | -1.989306 | 0.881464  | 0.001965  |
| 19 | 6  | -3.392292 | 0.656098  | -0.356017 |
| 20 | 1  | -3.920685 | 1.609130  | -0.537905 |
| 21 | 6  | -1.271549 | 1.562517  | -1.081308 |
| 22 | 1  | -0.195945 | 1.491223  | -0.881537 |
| 23 | 1  | -1.454255 | 0.981432  | -1.994198 |
| 24 | 6  | -1.873578 | 1.557594  | 1.296100  |
| 25 | 1  | -2.341420 | 0.911191  | 2.045023  |
| 26 | 1  | -2.440677 | 2.507472  | 1.300108  |
| 27 | 6  | -1.635808 | 3.028091  | -1.331920 |
| 28 | 1  | -1.386563 | 3.659332  | -0.472443 |
| 29 | 1  | -1.072247 | 3.402374  | -2.192589 |
| 30 | 1  | -2.700348 | 3.156781  | -1.550530 |
| 31 | 6  | -0.437401 | 1.811278  | 1.731036  |
| 32 | 1  | 0.089414  | 2.504450  | 1.067815  |
| 33 | 1  | 0.121460  | 0.871776  | 1.767381  |
| 34 | 6  | -4.170047 | -0.137809 | 0.689925  |
| 35 | 1  | -3.589418 | -0.993985 | 1.047130  |
| 36 | 1  | -4.444131 | 0.474778  | 1.553621  |
| 37 | 1  | -5.097761 | -0.515055 | 0.248309  |
| 38 | 1  | -3.394913 | 0.106258  | -1.304299 |
| 39 | 1  | -0.434028 | 2.246113  | 2.735303  |

*Transition state (TS):*

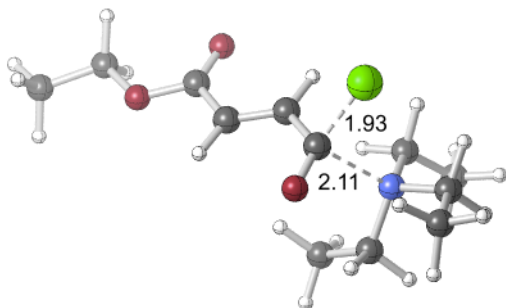

Charge = 0 Multiplicity = 1

HF = -1210.7743959 hartrees (-759773.041171209 kcal/mol)

Imaginary Frequencies: 1 (-131.8994 1/cm)

Zero-point correction = 0.338405 (Hartree/Particle)

Temperature 298.150 Kelvin. Pressure 1.00000 Atm.

Sum of electronic and thermal Free Energies =

-1210.484528 hartrees (-759591.14616528 kcal/mol)

Coordinates (from last standard orientation):

| Center<br>Number | Atomic<br>Number | Coordinates (Angstroms) |           |           |
|------------------|------------------|-------------------------|-----------|-----------|
|                  |                  | X                       | Y         | Z         |
| 1                | 6                | -0.812985               | -1.058155 | 0.367390  |
| 2                | 6                | 0.396742                | -0.570356 | -0.354985 |
| 3                | 6                | 1.562618                | -0.510442 | 0.286568  |
| 4                | 6                | 2.785491                | -0.092914 | -0.448496 |
| 5                | 6                | 5.104341                | 0.256549  | -0.265958 |
| 6                | 6                | 6.171428                | 0.179522  | 0.800838  |
| 7                | 1                | 0.321683                | -0.346568 | -1.412826 |
| 8                | 1                | 5.304229                | -0.427215 | -1.096420 |
| 9                | 1                | 5.003038                | 1.266685  | -0.673408 |
| 10               | 1                | 6.252717                | -0.836519 | 1.196936  |
| 11               | 1                | 7.137007                | 0.462994  | 0.372801  |
| 12               | 1                | 5.945368                | 0.860861  | 1.625856  |
| 13               | 1                | 1.654134                | -0.763562 | 1.338526  |
| 14               | 8                | -0.902151               | -1.284163 | 1.539226  |
| 15               | 8                | 2.814854                | 0.230521  | -1.615667 |
| 16               | 8                | 3.856459                | -0.119997 | 0.347016  |
| 17               | 17               | -1.609345               | -2.329916 | -0.850518 |
| 18               | 7                | -2.154589               | 0.537328  | 0.025845  |
| 19               | 6                | -3.531938               | 0.015488  | -0.143181 |
| 20               | 1                | -4.215624               | 0.868940  | -0.244641 |
| 21               | 6                | -1.753611               | 1.305022  | -1.172693 |
| 22               | 1                | -0.716155               | 1.618205  | -1.034296 |
| 23               | 1                | -1.772662               | 0.601660  | -2.013551 |
| 24               | 6                | -2.078299               | 1.310244  | 1.284054  |
| 25               | 1                | -2.163500               | 0.580751  | 2.094013  |
| 26               | 1                | -2.953731               | 1.972516  | 1.346775  |
| 27               | 6                | -2.605191               | 2.531035  | -1.495912 |
| 28               | 1                | -2.660759               | 3.219879  | -0.646657 |
| 29               | 1                | -2.141922               | 3.067126  | -2.329563 |
| 30               | 1                | -3.622438               | 2.267914  | -1.796092 |
| 31               | 6                | -0.803165               | 2.114628  | 1.480040  |
| 32               | 1                | -0.693306               | 2.919954  | 0.747950  |
| 33               | 1                | 0.083732                | 1.478669  | 1.435936  |
| 34               | 6                | -4.028752               | -0.868727 | 0.994611  |
| 35               | 1                | -3.329204               | -1.671865 | 1.230587  |
| 36               | 1                | -4.220387               | -0.293638 | 1.904721  |
| 37               | 1                | -4.977082               | -1.319555 | 0.686279  |
| 38               | 1                | -3.550995               | -0.535060 | -1.086235 |
| 39               | 1                | -0.836521               | 2.572842  | 2.472943  |

*Product:*

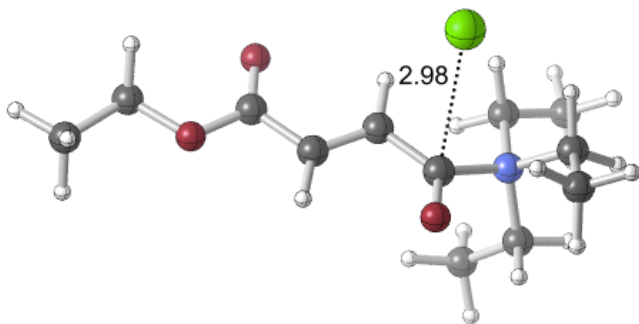

Charge = 0 Multiplicity = 1

HF = -1210.7906184 hartrees (-759783.220952184 kcal/mol)

Imaginary Frequencies: none found

Zero-point correction = 0.340948 (Hartree/Particle)

Temperature 298.150 Kelvin. Pressure 1.00000 Atm.

Sum of electronic and thermal Free Energies =

-1210.499612 hartrees (-759600.61152612 kcal/mol)

Coordinates (from last standard orientation):

| Center Number | Atomic Number | Coordinates (Angstroms) |           |           |
|---------------|---------------|-------------------------|-----------|-----------|
|               |               | X                       | Y         | Z         |
| 1             | 6             | 0.842040                | -0.022438 | -0.684159 |
| 2             | 6             | -0.373239               | -0.056806 | 0.165040  |
| 3             | 6             | -1.554578               | 0.126218  | -0.429483 |
| 4             | 6             | -2.794040               | 0.102788  | 0.391025  |
| 5             | 6             | -5.144102               | 0.140221  | 0.309974  |
| 6             | 6             | -6.230179               | 0.228388  | -0.736412 |
| 7             | 1             | -0.311885               | -0.213988 | 1.232035  |
| 8             | 1             | -5.196507               | -0.792919 | 0.878562  |
| 9             | 1             | -5.186085               | 0.973535  | 1.017664  |
| 10            | 1             | -6.153946               | -0.601038 | -1.444913 |
| 11            | 1             | -7.209222               | 0.180225  | -0.251721 |
| 12            | 1             | -6.162426               | 1.169727  | -1.288763 |
| 13            | 1             | -1.650132               | 0.268364  | -1.501248 |
| 14            | 8             | 0.835910                | -0.114852 | -1.875736 |
| 15            | 8             | -2.820793               | 0.018918  | 1.598960  |
| 16            | 8             | -3.879763               | 0.185114  | -0.379457 |
| 17            | 17            | 0.948032                | -2.722907 | 0.561995  |
| 18            | 7             | 2.183810                | 0.406643  | -0.047954 |
| 19            | 6             | 3.293992                | -0.624507 | -0.287082 |



|    |   |          |           |           |
|----|---|----------|-----------|-----------|
| 20 | 1 | 4.214674 | -0.085508 | -0.059267 |
| 21 | 6 | 2.047143 | 0.614889  | 1.446800  |
| 22 | 1 | 1.217658 | 1.305934  | 1.598238  |
| 23 | 1 | 1.771514 | -0.365305 | 1.844057  |
| 24 | 6 | 2.570669 | 1.695891  | -0.759365 |
| 25 | 1 | 2.610545 | 1.444205  | -1.818629 |
| 26 | 1 | 3.579616 | 1.935671  | -0.422046 |
| 27 | 6 | 3.292999 | 1.153223  | 2.127544  |
| 28 | 1 | 3.581658 | 2.140625  | 1.756649  |
| 29 | 1 | 3.053360 | 1.258406  | 3.189278  |
| 30 | 1 | 4.144417 | 0.474455  | 2.048468  |
| 31 | 6 | 1.614903 | 2.846784  | -0.506151 |
| 32 | 1 | 1.639655 | 3.185890  | 0.532273  |
| 33 | 1 | 0.583098 | 2.599835  | -0.774815 |
| 34 | 6 | 3.376604 | -1.236540 | -1.671438 |
| 35 | 1 | 2.525860 | -1.887026 | -1.874842 |
| 36 | 1 | 3.474005 | -0.495960 | -2.468431 |
| 37 | 1 | 4.282392 | -1.851465 | -1.674004 |
| 38 | 1 | 3.124258 | -1.405349 | 0.452994  |
| 39 | 1 | 1.928167 | 3.682491  | -1.137677 |

*Acylammonium formation between ethyl fumaroyl chloride (5) and Hünig's base:*

*Reactant:*

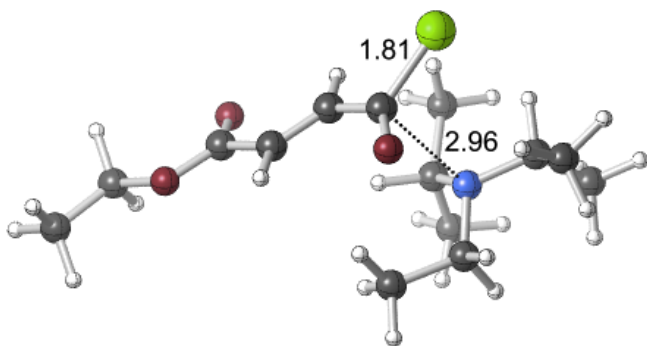

Charge = 0 Multiplicity = 1

HF = -1289.3633803 hartrees (-809088.414772053 kcal/mol)

Imaginary Frequencies: none found

Zero-point correction = 0.394577 (Hartree/Particle)

Temperature 298.150 Kelvin. Pressure 1.00000 Atm.

Sum of electronic and thermal Free Energies =

-1289.022464 hartrees (-808874.48638464 kcal/mol)

Coordinates (from last standard orientation):

| Center<br>Number | Atomic<br>Number | Coordinates (Angstroms) |           |           |
|------------------|------------------|-------------------------|-----------|-----------|
|                  |                  | X                       | Y         | Z         |
| 1                | 6                | -0.384596               | -1.942868 | 0.294707  |
| 2                | 6                | 0.697016                | -1.204357 | -0.388663 |
| 3                | 6                | 1.837303                | -0.952673 | 0.254170  |
| 4                | 6                | 2.915324                | -0.200794 | -0.448412 |
| 5                | 6                | 5.131376                | 0.570042  | -0.287479 |
| 6                | 6                | 6.247797                | 0.563350  | 0.729788  |
| 7                | 1                | 0.553296                | -0.904991 | -1.421322 |
| 8                | 1                | 5.413440                | 0.057151  | -1.211720 |
| 9                | 1                | 4.811500                | 1.584345  | -0.542556 |
| 10               | 1                | 6.536262                | -0.460858 | 0.981706  |
| 11               | 1                | 7.120326                | 1.077752  | 0.317714  |
| 12               | 1                | 5.942008                | 1.078055  | 1.644817  |
| 13               | 1                | 2.014251                | -1.273546 | 1.276578  |
| 14               | 8                | -0.512805               | -2.138040 | 1.460220  |
| 15               | 8                | 2.802637                | 0.284368  | -1.552128 |
| 16               | 8                | 4.014704                | -0.129936 | 0.298510  |
| 17               | 17               | -1.510495               | -2.724170 | -0.881980 |
| 18               | 7                | -1.830511               | 0.638211  | 0.277162  |
| 19               | 6                | -3.212605               | 0.261915  | -0.085477 |
| 20               | 6                | -1.117129               | 1.512442  | -0.678976 |
| 21               | 1                | -0.049574               | 1.347844  | -0.477802 |
| 22               | 6                | -1.706909               | 1.086647  | 1.665731  |
| 23               | 1                | -2.183884               | 0.334393  | 2.299339  |
| 24               | 1                | -2.244434               | 2.033851  | 1.845692  |
| 25               | 6                | -1.347858               | 3.026064  | -0.530984 |
| 26               | 1                | -1.124531               | 3.380867  | 0.479691  |
| 27               | 1                | -0.677949               | 3.555586  | -1.217844 |
| 28               | 1                | -2.371876               | 3.321005  | -0.775112 |
| 29               | 6                | -0.267172               | 1.230142  | 2.147760  |
| 30               | 1                | 0.299318                | 1.985459  | 1.594427  |
| 31               | 1                | 0.257613                | 0.274615  | 2.070272  |
| 32               | 6                | -3.777754               | -0.779588 | 0.887397  |
| 33               | 1                | -3.021500               | -1.514214 | 1.177334  |
| 34               | 1                | -4.174702               | -0.315906 | 1.797130  |
| 35               | 1                | -4.604185               | -1.311677 | 0.405461  |
| 36               | 1                | -3.140195               | -0.228694 | -1.061632 |
| 37               | 1                | -0.271223               | 1.528400  | 3.201203  |
| 38               | 6                | -1.355113               | 1.091726  | -2.128359 |
| 39               | 1                | -0.606775               | 1.568100  | -2.769734 |
| 40               | 1                | -1.272290               | 0.007957  | -2.258052 |
| 41               | 1                | -2.343748               | 1.398555  | -2.487214 |

|    |   |           |          |           |
|----|---|-----------|----------|-----------|
| 42 | 6 | -4.217241 | 1.417658 | -0.217850 |
| 43 | 1 | -4.233343 | 2.039105 | 0.684888  |
| 44 | 1 | -4.001045 | 2.059434 | -1.075477 |
| 45 | 1 | -5.225696 | 1.011448 | -0.357200 |

Transition state (TS):

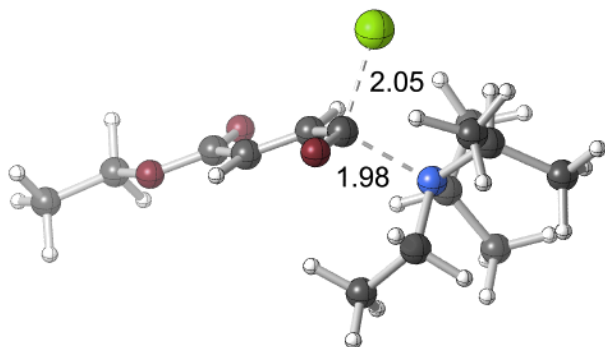

Charge = 0 Multiplicity = 1

HF = -1289.3534775 hartrees (-809082.200666025 kcal/mol)

Imaginary Frequencies: 1 (-194.0286 1/cm)

Zero-point correction = 0.396673 (Hartree/Particle)

Temperature 298.150 Kelvin. Pressure 1.00000 Atm.

Sum of electronic and thermal Free Energies =

-1289.006201 hartrees (-808864.28118951 kcal/mol)

Coordinates (from last standard orientation):

| Center Number | Atomic Number | Coordinates (Angstroms) |           |           |
|---------------|---------------|-------------------------|-----------|-----------|
|               |               | X                       | Y         | Z         |
| 1             | 6             | -0.476335               | -1.026409 | 0.443975  |
| 2             | 6             | 0.715802                | -0.516416 | -0.301024 |
| 3             | 6             | 1.892962                | -0.459722 | 0.320492  |
| 4             | 6             | 3.099974                | -0.029697 | -0.432221 |
| 5             | 6             | 5.420522                | 0.328906  | -0.285039 |
| 6             | 6             | 6.503061                | 0.255975  | 0.766455  |
| 7             | 1             | 0.629769                | -0.275774 | -1.353647 |
| 8             | 1             | 5.612297                | -0.352432 | -1.119466 |
| 9             | 1             | 5.307972                | 1.339121  | -0.689308 |
| 10            | 1             | 6.594567                | -0.760107 | 1.160215  |
| 11            | 1             | 7.461382                | 0.544596  | 0.325786  |
| 12            | 1             | 6.284847                | 0.935197  | 1.595354  |

|    |    |           |           |           |
|----|----|-----------|-----------|-----------|
| 13 | 1  | 2.007166  | -0.729078 | 1.366030  |
| 14 | 8  | -0.480897 | -1.383615 | 1.586449  |
| 15 | 8  | 3.109333  | 0.302709  | -1.597372 |
| 16 | 8  | 4.184250  | -0.055795 | 0.345683  |
| 17 | 17 | -1.117000 | -2.471957 | -0.865548 |
| 18 | 7  | -1.880029 | 0.351767  | 0.244422  |
| 19 | 6  | -3.207423 | -0.314095 | -0.032926 |
| 20 | 6  | -1.468783 | 1.358209  | -0.801863 |
| 21 | 1  | -0.406061 | 1.520730  | -0.604452 |
| 22 | 6  | -1.871929 | 0.940313  | 1.612664  |
| 23 | 1  | -1.995051 | 0.107213  | 2.304490  |
| 24 | 1  | -2.747289 | 1.587662  | 1.720406  |
| 25 | 6  | -2.126457 | 2.745561  | -0.716117 |
| 26 | 1  | -2.201721 | 3.135296  | 0.300779  |
| 27 | 1  | -1.494702 | 3.436768  | -1.283797 |
| 28 | 1  | -3.119061 | 2.770937  | -1.167350 |
| 29 | 6  | -0.606020 | 1.694495  | 1.999627  |
| 30 | 1  | -0.404820 | 2.568133  | 1.374574  |
| 31 | 1  | 0.269856  | 1.043376  | 1.980772  |
| 32 | 6  | -3.578211 | -1.324746 | 1.055606  |
| 33 | 1  | -2.738937 | -1.947611 | 1.364512  |
| 34 | 1  | -3.993461 | -0.826233 | 1.938107  |
| 35 | 1  | -4.356059 | -1.979960 | 0.651989  |
| 36 | 1  | -3.052846 | -0.861126 | -0.962509 |
| 37 | 1  | -0.731679 | 2.047922  | 3.027652  |
| 38 | 6  | -1.614466 | 0.813442  | -2.221162 |
| 39 | 1  | -1.062639 | 1.471118  | -2.899900 |
| 40 | 1  | -1.223462 | -0.200093 | -2.334224 |
| 41 | 1  | -2.659913 | 0.808862  | -2.543544 |
| 42 | 6  | -4.384410 | 0.645899  | -0.236506 |
| 43 | 1  | -4.481565 | 1.375807  | 0.572971  |
| 44 | 1  | -4.340310 | 1.177894  | -1.187313 |
| 45 | 1  | -5.300282 | 0.046011  | -0.244615 |

*Product:*

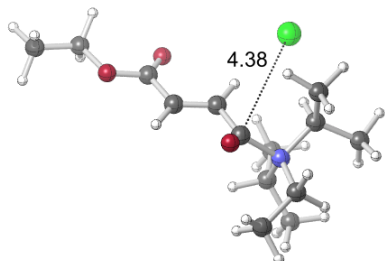

Charge = 0 Multiplicity = 1

HF = -1289.364557 hartrees (-809089.15316307 kcal/mol)

Imaginary Frequencies: none found

Zero-point correction = 0.397584 (Hartree/Particle)

Temperature 298.150 Kelvin. Pressure 1.00000 Atm.

Sum of electronic and thermal Free Energies =

-1289.021178 hartrees (-808873.67940678 kcal/mol)

Coordinates (from last standard orientation):

| -----  |        |                         |           |           |
|--------|--------|-------------------------|-----------|-----------|
| Center | Atomic | Coordinates (Angstroms) |           |           |
| Number | Number | X                       | Y         | Z         |
| -----  |        |                         |           |           |
| 1      | 6      | -0.593365               | -0.853838 | -0.763860 |
| 2      | 6      | 0.578926                | -0.063923 | -0.315641 |
| 3      | 6      | 1.752983                | -0.696960 | -0.270789 |
| 4      | 6      | 2.988213                | 0.021166  | 0.156849  |
| 5      | 6      | 5.333751                | -0.112954 | 0.246203  |
| 6      | 6      | 6.418908                | -1.090558 | -0.139375 |
| 7      | 1      | 0.477004                | 1.001137  | -0.088333 |
| 8      | 1      | 1.849494                | -1.745077 | -0.541019 |
| 9      | 8      | -0.552456               | -1.690818 | -1.615669 |
| 10     | 8      | 3.007264                | 1.112822  | 0.673928  |
| 11     | 8      | 4.070709                | -0.711071 | -0.108711 |
| 12     | 17     | -0.193118               | 3.456694  | -0.131252 |
| 13     | 7      | -1.933271               | -0.570201 | -0.091895 |
| 14     | 6      | -2.359877               | 0.843528  | -0.583142 |
| 15     | 6      | -1.726263               | -0.655443 | 1.466288  |
| 16     | 1      | -0.908144               | -1.375015 | 1.569433  |
| 17     | 6      | -2.932874               | -1.611710 | -0.561743 |
| 18     | 1      | -3.074462               | -1.445417 | -1.628653 |
| 19     | 1      | -3.860429               | -1.355377 | -0.055742 |
| 20     | 6      | -2.937823               | -1.206064 | 2.218590  |

|    |   |           |           |           |
|----|---|-----------|-----------|-----------|
| 21 | 1 | -3.230602 | -2.212761 | 1.921832  |
| 22 | 1 | -2.644119 | -1.252919 | 3.271080  |
| 23 | 1 | -3.804946 | -0.545378 | 2.152235  |
| 24 | 6 | -2.538669 | -3.065844 | -0.292104 |
| 25 | 1 | -1.824736 | -3.171535 | 0.528916  |
| 26 | 1 | -2.096172 | -3.524179 | -1.175547 |
| 27 | 6 | -2.145822 | 1.007865  | -2.083945 |
| 28 | 1 | -1.097723 | 0.916396  | -2.381730 |
| 29 | 1 | -2.753113 | 0.324994  | -2.685034 |
| 30 | 1 | -2.447050 | 2.030072  | -2.328267 |
| 31 | 1 | -1.678649 | 1.537716  | -0.086772 |
| 32 | 1 | -3.435508 | -3.629075 | -0.020807 |
| 33 | 6 | -1.313000 | 0.666935  | 2.107666  |
| 34 | 1 | -1.040630 | 0.433771  | 3.140943  |
| 35 | 1 | -0.459756 | 1.166900  | 1.649709  |
| 36 | 1 | -2.146183 | 1.375268  | 2.136089  |
| 37 | 6 | -3.792910 | 1.180201  | -0.199627 |
| 38 | 1 | -4.522795 | 0.631517  | -0.801675 |
| 39 | 1 | -4.006223 | 1.020952  | 0.858711  |
| 40 | 1 | -3.926482 | 2.247082  | -0.401700 |
| 41 | 1 | 5.329253  | 0.095041  | 1.320179  |
| 42 | 1 | 5.428747  | 0.838320  | -0.285233 |
| 43 | 1 | 6.296355  | -2.037747 | 0.393240  |
| 44 | 1 | 6.400150  | -1.287247 | -1.214885 |
| 45 | 1 | 7.395437  | -0.671696 | 0.118960  |

**b. Diels-Alder step of the DAL organocascade**

**i. Acylammonium salts derived from Brønsted bases:**

*Diene:*

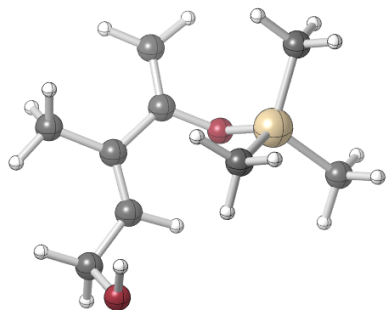

Charge = 0 Multiplicity = 1

HF = -793.4977666 hartrees (-497927.783519166 kcal/mol)

Imaginary Frequencies: none found

Zero-point correction = 0.255956 (Hartree/Particle)

Temperature 298.150 Kelvin. Pressure 1.00000 Atm.

Sum of electronic and thermal Free Energies =

-793.286374 hartrees (-497795.13254874 kcal/mol)

Coordinates (from last standard orientation):

| Center<br>Number | Atomic<br>Number | Coordinates (Angstroms) |           |           |
|------------------|------------------|-------------------------|-----------|-----------|
|                  |                  | X                       | Y         | Z         |
| 1                | 6                | -1.789481               | -0.288014 | -0.572437 |
| 2                | 6                | 0.380319                | 2.656051  | -0.177700 |
| 3                | 6                | -3.090830               | -0.997507 | -0.350989 |
| 4                | 6                | -0.048458               | 1.411338  | -0.423352 |
| 5                | 6                | 0.791570                | -1.302206 | 1.391004  |
| 6                | 6                | 3.117543                | 0.624855  | 0.841751  |
| 7                | 6                | 2.564231                | -1.710651 | -1.107445 |
| 8                | 6                | -1.445877               | 0.955064  | -0.200382 |
| 9                | 6                | -2.378693               | 1.946485  | 0.443736  |
| 10               | 1                | -1.034051               | -0.907485 | -1.051103 |
| 11               | 1                | 1.413073                | 2.925175  | -0.374643 |
| 12               | 1                | -0.283560               | 3.425212  | 0.196776  |
| 13               | 1                | -3.831018               | -0.372046 | 0.161086  |
| 14               | 1                | -3.524191               | -1.299905 | -1.310550 |

|    |    |           |           |           |
|----|----|-----------|-----------|-----------|
| 15 | 1  | 0.046637  | -1.982972 | 0.964440  |
| 16 | 1  | 1.448027  | -1.888470 | 2.045693  |
| 17 | 1  | 0.266990  | -0.572411 | 2.018642  |
| 18 | 1  | 3.697007  | 1.161466  | 0.082416  |
| 19 | 1  | 2.678684  | 1.363738  | 1.521178  |
| 20 | 1  | 3.816673  | 0.014203  | 1.425967  |
| 21 | 1  | 3.238273  | -2.390030 | -0.573475 |
| 22 | 1  | 1.786506  | -2.316488 | -1.585546 |
| 23 | 1  | 3.140843  | -1.217469 | -1.897471 |
| 24 | 1  | -2.480754 | -1.965170 | 1.218249  |
| 25 | 1  | -1.969850 | 2.302424  | 1.395567  |
| 26 | 1  | -2.512158 | 2.823853  | -0.199200 |
| 27 | 1  | -3.365079 | 1.520991  | 0.631188  |
| 28 | 8  | 0.810376  | 0.473233  | -0.934987 |
| 29 | 8  | -2.871154 | -2.210857 | 0.364149  |
| 30 | 14 | 1.810874  | -0.464008 | 0.059455  |

*Ethyl fumaroyl chloride (5):*

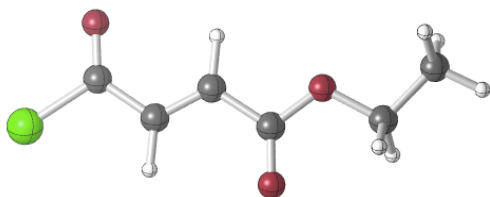

Charge = 0 Multiplicity = 1

HF = -918.5039922 hartrees (-576370.440145422 kcal/mol)

Imaginary Frequencies: none found

Zero-point correction = 0.126267 (Hartree/Particle)

Temperature 298.150 Kelvin. Pressure 1.00000 Atm.

Sum of electronic and thermal Free Energies =

-918.416338 hartrees (-576315.43625838 kcal/mol)

Coordinates (from last standard orientation):

| Center Number | Atomic Number | Coordinates (Angstroms) |           |           |
|---------------|---------------|-------------------------|-----------|-----------|
|               |               | X                       | Y         | Z         |
| 1             | 6             | -2.404785               | 0.535097  | -0.020979 |
| 2             | 6             | 0.008958                | 0.346013  | -0.031898 |
| 3             | 6             | -1.169862               | -0.277188 | -0.025157 |
| 4             | 6             | 1.268965                | -0.453229 | -0.032192 |



|    |    |           |           |           |
|----|----|-----------|-----------|-----------|
| 5  | 6  | 3.616705  | -0.317867 | -0.008249 |
| 6  | 6  | 4.675205  | 0.755901  | 0.080148  |
| 7  | 1  | 0.088461  | 1.428999  | -0.034584 |
| 8  | 1  | -1.250380 | -1.358672 | -0.017684 |
| 9  | 1  | 3.699592  | -0.904604 | -0.927911 |
| 10 | 1  | 3.655164  | -1.005150 | 0.841606  |
| 11 | 1  | 4.570953  | 1.326879  | 1.006880  |
| 12 | 1  | 5.665622  | 0.292605  | 0.068215  |
| 13 | 1  | 4.604344  | 1.443500  | -0.767095 |
| 14 | 8  | -2.491100 | 1.719758  | -0.059931 |
| 15 | 8  | 2.334266  | 0.343047  | -0.005009 |
| 16 | 8  | 1.311464  | -1.661878 | -0.054280 |
| 17 | 17 | -3.896583 | -0.468432 | 0.059665  |

*Acylammonium dienophile derived from ethyl fumaroyl chloride (5) and pyridine:*

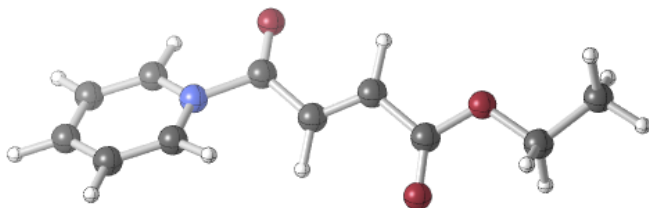

Charge = 1 Multiplicity = 1

HF = -706.3614774 hartrees (-443248.890683274 kcal/mol)

Imaginary Frequencies: none found

Zero-point correction = 0.219936 (Hartree/Particle)

Temperature 298.150 Kelvin. Pressure 1.00000 Atm.

Sum of electronic and thermal Free Energies =

-706.184460 hartrees (-443137.8104946 kcal/mol)

Coordinates (from last standard orientation):

| Center<br>Number | Atomic<br>Number | Coordinates (Angstroms) |           |           |
|------------------|------------------|-------------------------|-----------|-----------|
|                  |                  | X                       | Y         | Z         |
| 1                | 6                | 1.051231                | 0.913486  | -0.033286 |
| 2                | 6                | -0.104591               | 0.030699  | 0.197673  |
| 3                | 6                | -1.324891               | 0.487782  | -0.089769 |
| 4                | 6                | -2.511005               | -0.381272 | 0.178032  |
| 5                | 6                | -4.855612               | -0.505437 | 0.083648  |
| 6                | 6                | -6.008857               | 0.387741  | -0.305468 |
| 7                | 1                | 0.032740                | -0.956437 | 0.627479  |

|    |   |           |           |           |
|----|---|-----------|-----------|-----------|
| 8  | 1 | -4.816468 | -1.416647 | -0.519783 |
| 9  | 1 | -4.892207 | -0.792768 | 1.138021  |
| 10 | 1 | -5.943936 | 0.670577  | -1.359698 |
| 11 | 1 | -6.949916 | -0.146518 | -0.148541 |
| 12 | 1 | -6.020433 | 1.295617  | 0.303588  |
| 13 | 1 | -1.488608 | 1.473743  | -0.515198 |
| 14 | 8 | 1.022942  | 2.097287  | -0.199073 |
| 15 | 8 | -2.436884 | -1.500857 | 0.629671  |
| 16 | 8 | -3.638609 | 0.240541  | -0.141916 |
| 17 | 6 | 3.446761  | 1.022276  | 0.323927  |
| 18 | 6 | 4.714337  | 0.482942  | 0.322625  |
| 19 | 6 | 4.886892  | -0.846616 | -0.059652 |
| 20 | 6 | 3.781412  | -1.607507 | -0.434671 |
| 21 | 6 | 2.529101  | -1.032120 | -0.407323 |
| 22 | 7 | 2.385651  | 0.257686  | -0.025419 |
| 23 | 1 | 5.878869  | -1.286061 | -0.069007 |
| 24 | 1 | 3.225619  | 2.046497  | 0.597662  |
| 25 | 1 | 5.552403  | 1.101988  | 0.618259  |
| 26 | 1 | 3.880167  | -2.638244 | -0.752242 |
| 27 | 1 | 1.633962  | -1.563159 | -0.706486 |

*Acylammonium dienophile derived from ethyl fumaroyl chloride (5) and 2,6-lutidine:*

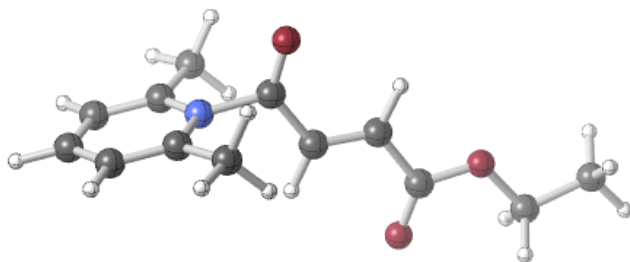

Charge = 1 Multiplicity = 1

HF = -784.9616092 hartrees (-492571.259389092 kcal/mol)

Imaginary Frequencies: none found

Zero-point correction = 0.274661 (Hartree/Particle)

Temperature 298.150 Kelvin. Pressure 1.00000 Atm.

Sum of electronic and thermal Free Energies =

-784.734120 hartrees (-492428.5076412 kcal/mol)

Coordinates (from last standard orientation):

| Center<br>Number | Atomic<br>Number | Coordinates (Angstroms) |           |           |
|------------------|------------------|-------------------------|-----------|-----------|
|                  |                  | X                       | Y         | Z         |
| 1                | 6                | -0.787054               | -0.033321 | 0.930371  |
| 2                | 6                | 0.359096                | -0.017980 | 0.008600  |
| 3                | 6                | 1.601895                | -0.017905 | 0.496266  |
| 4                | 6                | 2.756148                | 0.001628  | -0.453823 |
| 5                | 6                | 5.099831                | 0.013430  | -0.624761 |
| 6                | 6                | 6.291154                | 0.000536  | 0.302689  |
| 7                | 1                | 0.166558                | -0.003692 | -1.060937 |
| 8                | 1                | 5.079417                | -0.859866 | -1.282792 |
| 9                | 1                | 5.070358                | 0.913310  | -1.245419 |
| 10               | 1                | 6.295332                | -0.902597 | 0.918944  |
| 11               | 1                | 7.209916                | 0.018954  | -0.290127 |
| 12               | 1                | 6.283984                | 0.875940  | 0.957782  |
| 13               | 1                | 1.806036                | -0.029515 | 1.563365  |
| 14               | 8                | -0.772960               | -0.062317 | 2.124348  |
| 15               | 8                | 2.636389                | 0.025966  | -1.657141 |
| 16               | 8                | 3.911748                | -0.009572 | 0.198240  |
| 17               | 6                | -2.675414               | 1.209324  | -0.016083 |
| 18               | 6                | -3.917356               | 1.237094  | -0.628037 |
| 19               | 6                | -4.555280               | 0.045925  | -0.955086 |
| 20               | 6                | -3.947625               | -1.171437 | -0.669025 |
| 21               | 6                | -2.706222               | -1.196089 | -0.055782 |
| 22               | 7                | -2.118469               | -0.005197 | 0.243174  |
| 23               | 1                | -5.529112               | 0.066451  | -1.433437 |
| 24               | 1                | -4.371209               | 2.198863  | -0.837003 |
| 25               | 1                | -4.425535               | -2.113414 | -0.911950 |
| 26               | 6                | -1.921525               | 2.441689  | 0.373492  |
| 27               | 1                | -1.740387               | 2.467632  | 1.452495  |
| 28               | 1                | -0.954949               | 2.491582  | -0.140218 |
| 29               | 1                | -2.503801               | 3.320486  | 0.096457  |
| 30               | 6                | -1.987058               | -2.460020 | 0.296750  |
| 31               | 1                | -1.004000               | -2.503719 | -0.185596 |
| 32               | 1                | -1.843670               | -2.539581 | 1.378954  |
| 33               | 1                | -2.574614               | -3.314327 | -0.039752 |

*Acylammonium dienophile derived from ethyl fumaroyl chloride (5) and DTBP:*

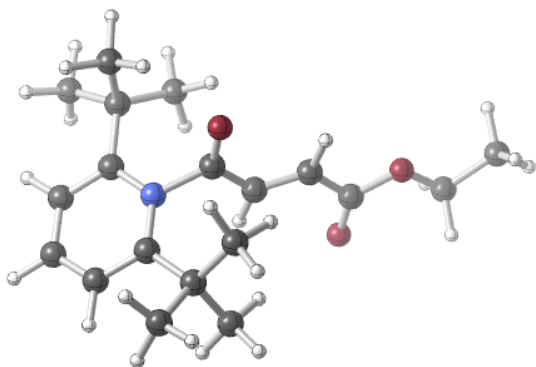

Charge = 1 Multiplicity = 1

HF = -1020.7003767 hartrees (-640499.693383017 kcal/mol)

Imaginary Frequencies: none found

Zero-point correction = 0.447918 (Hartree/Particle)

Temperature 298.150 Kelvin. Pressure 1.00000 Atm.

Sum of electronic and thermal Free Energies =

-1020.305883 hartrees (-640252.14464133 kcal/mol)

Coordinates (from last standard orientation):

| Center<br>Number | Atomic<br>Number | Coordinates (Angstroms) |           |           |
|------------------|------------------|-------------------------|-----------|-----------|
|                  |                  | X                       | Y         | Z         |
| 1                | 6                | 0.289212                | -0.196706 | 0.803466  |
| 2                | 6                | -0.878713               | -0.095559 | -0.093134 |
| 3                | 6                | -2.109334               | -0.179559 | 0.415885  |
| 4                | 6                | -3.284767               | -0.064710 | -0.498459 |
| 5                | 6                | -5.623235               | -0.253665 | -0.647511 |
| 6                | 6                | -6.778905               | -0.586669 | 0.265263  |
| 7                | 1                | -0.708760               | 0.050499  | -1.156527 |
| 8                | 1                | -5.706469               | 0.751099  | -1.070996 |
| 9                | 1                | -5.528170               | -0.967951 | -1.470270 |
| 10               | 1                | -6.851596               | 0.137145  | 1.081523  |
| 11               | 1                | -7.710989               | -0.559413 | -0.305836 |
| 12               | 1                | -6.662142               | -1.587321 | 0.690124  |
| 13               | 1                | -2.287104               | -0.330009 | 1.477568  |
| 14               | 8                | 0.286367                | -0.462575 | 1.966884  |
| 15               | 8                | -3.199329               | 0.217234  | -1.671876 |
| 16               | 8                | -4.417374               | -0.314292 | 0.146490  |
| 17               | 6                | 2.319380                | -1.030330 | -0.311334 |

|    |   |           |           |           |
|----|---|-----------|-----------|-----------|
| 18 | 6 | 3.408117  | -0.780342 | -1.132798 |
| 19 | 6 | 3.730968  | 0.512022  | -1.515143 |
| 20 | 6 | 2.996324  | 1.575958  | -1.028419 |
| 21 | 6 | 1.910526  | 1.369891  | -0.185518 |
| 22 | 7 | 1.587693  | 0.065405  | 0.105042  |
| 23 | 1 | 4.567866  | 0.688545  | -2.182905 |
| 24 | 1 | 4.006898  | -1.601955 | -1.493933 |
| 25 | 1 | 3.268217  | 2.583172  | -1.306994 |
| 26 | 6 | 1.147629  | 2.612333  | 0.337801  |
| 27 | 6 | 2.005538  | -2.473002 | 0.143605  |
| 28 | 6 | 0.147549  | 3.076770  | -0.739662 |
| 29 | 1 | -0.679529 | 2.373968  | -0.873967 |
| 30 | 1 | -0.276800 | 4.036509  | -0.426592 |
| 31 | 1 | 0.644408  | 3.219374  | -1.704543 |
| 32 | 6 | 2.178182  | 3.747651  | 0.546078  |
| 33 | 1 | 1.671200  | 4.578445  | 1.043049  |
| 34 | 1 | 3.010551  | 3.426724  | 1.180302  |
| 35 | 1 | 2.576168  | 4.137900  | -0.392911 |
| 36 | 6 | 2.851204  | -3.464009 | -0.678445 |
| 37 | 1 | 3.923945  | -3.336018 | -0.511971 |
| 38 | 1 | 2.593375  | -4.474064 | -0.350475 |
| 39 | 1 | 2.641299  | -3.392222 | -1.750681 |
| 40 | 6 | 2.433649  | -2.636443 | 1.615880  |
| 41 | 1 | 1.876944  | -1.987313 | 2.292586  |
| 42 | 1 | 2.258287  | -3.675953 | 1.912186  |
| 43 | 1 | 3.501829  | -2.424196 | 1.728203  |
| 44 | 6 | 0.534262  | -2.898756 | -0.057788 |
| 45 | 1 | -0.136989 | -2.560658 | 0.731870  |
| 46 | 1 | 0.147060  | -2.571283 | -1.028631 |
| 47 | 1 | 0.496385  | -3.991486 | -0.040973 |
| 48 | 6 | 0.421180  | 2.454883  | 1.687670  |
| 49 | 1 | 1.057225  | 1.989623  | 2.446375  |
| 50 | 1 | 0.163091  | 3.458879  | 2.033526  |
| 51 | 1 | -0.519959 | 1.908655  | 1.618987  |

*Acylammonium dienophile derived from ethyl fumaroyl chloride (5) and Et<sub>3</sub>N:*

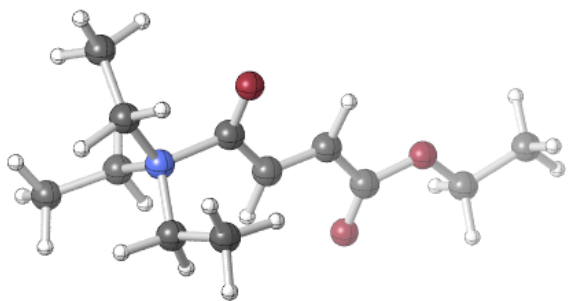

Charge = 1 Multiplicity = 1

HF = -750.4551881 hartrees (-470918.135084631 kcal/mol)

Imaginary Frequencies: none found

Zero-point correction = 0.340766 (Hartree/Particle)

Temperature 298.150 Kelvin. Pressure 1.00000 Atm.

Sum of electronic and thermal Free Energies =

-750.161330 hartrees (-470733.7361883 kcal/mol)

Coordinates (from last standard orientation):

| Center Number | Atomic Number | Coordinates (Angstroms) |           |           |
|---------------|---------------|-------------------------|-----------|-----------|
|               |               | X                       | Y         | Z         |
| 1             | 6             | -0.931358               | 0.662278  | -0.039854 |
| 2             | 6             | 0.281412                | -0.180919 | -0.009686 |
| 3             | 6             | 1.471248                | 0.407580  | -0.147895 |
| 4             | 6             | 2.711337                | -0.424495 | -0.085710 |
| 5             | 6             | 5.061738                | -0.356668 | -0.111688 |
| 6             | 6             | 6.148448                | 0.686966  | -0.211790 |
| 7             | 1             | 0.218829                | -1.252410 | 0.144774  |
| 8             | 1             | 5.104612                | -0.909034 | 0.831384  |
| 9             | 1             | 5.101700                | -1.076428 | -0.934288 |
| 10            | 1             | 6.071386                | 1.407625  | 0.606962  |
| 11            | 1             | 7.125669                | 0.200154  | -0.153041 |
| 12            | 1             | 6.085024                | 1.224444  | -1.161770 |
| 13            | 1             | 1.576385                | 1.478252  | -0.297077 |
| 14            | 8             | -0.943578               | 1.853292  | -0.128318 |
| 15            | 8             | 2.714073                | -1.628139 | 0.035399  |
| 16            | 8             | 3.795328                | 0.336039  | -0.174632 |
| 17            | 7             | -2.263632               | -0.068448 | 0.102818  |
| 18            | 6             | -2.293775               | -0.702762 | 1.492514  |
| 19            | 1             | -3.303949               | -1.095553 | 1.611670  |

|    |   |           |           |           |
|----|---|-----------|-----------|-----------|
| 20 | 6 | -2.348011 | -1.151215 | -0.968240 |
| 21 | 1 | -2.175077 | -0.651231 | -1.923436 |
| 22 | 1 | -1.521840 | -1.836498 | -0.783210 |
| 23 | 6 | -3.406958 | 0.923020  | -0.027938 |
| 24 | 1 | -3.185598 | 1.737952  | 0.659152  |
| 25 | 1 | -4.287657 | 0.392449  | 0.336272  |
| 26 | 6 | -3.659985 | -1.915372 | -0.968194 |
| 27 | 1 | -4.525047 | -1.276406 | -1.158386 |
| 28 | 1 | -3.601049 | -2.646458 | -1.779258 |
| 29 | 1 | -3.816807 | -2.467599 | -0.039091 |
| 30 | 6 | -3.621342 | 1.453529  | -1.434294 |
| 31 | 1 | -3.981443 | 0.687302  | -2.124267 |
| 32 | 1 | -2.719240 | 1.910571  | -1.845329 |
| 33 | 6 | -1.954289 | 0.265982  | 2.610445  |
| 34 | 1 | -0.942993 | 0.673878  | 2.522410  |
| 35 | 1 | -2.668818 | 1.089029  | 2.679658  |
| 36 | 1 | -2.001039 | -0.293980 | 3.548168  |
| 37 | 1 | -1.595346 | -1.543282 | 1.466156  |
| 38 | 1 | -4.389647 | 2.229269  | -1.372787 |

*Acylammonium dienophile derived from ethyl fumaroyl chloride (5) and Hünig's base:*

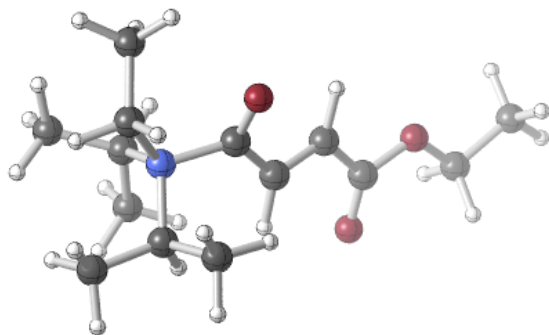

Charge = 1 Multiplicity = 1

HF = -829.0284781 hartrees (-520223.660292531 kcal/mol)

Imaginary Frequencies: none found

Zero-point correction = 0.398120 (Hartree/Particle)

Temperature 298.150 Kelvin. Pressure 1.00000 Atm.

Sum of electronic and thermal Free Energies =

-828.679307 hartrees (-520004.55193557 kcal/mol)

Coordinates (from last standard orientation):

| Center<br>Number | Atomic<br>Number | Coordinates (Angstroms) |           |           |
|------------------|------------------|-------------------------|-----------|-----------|
|                  |                  | X                       | Y         | Z         |
| 1                | 6                | 0.624539                | 0.753464  | -0.486237 |
| 2                | 6                | -0.581148               | -0.091066 | -0.331366 |
| 3                | 6                | -1.757283               | 0.495965  | -0.108087 |
| 4                | 6                | -2.977516               | -0.357512 | 0.011718  |
| 5                | 6                | -5.324435               | -0.337195 | 0.143803  |
| 6                | 6                | -6.436934               | 0.683380  | 0.125206  |
| 7                | 1                | -0.521961               | -1.168120 | -0.438886 |
| 8                | 1                | -1.865093               | 1.572402  | -0.011177 |
| 9                | 8                | 0.608301                | 1.865377  | -0.920370 |
| 10               | 8                | -2.954692               | -1.566715 | 0.052205  |
| 11               | 8                | -4.076414               | 0.385769  | 0.057176  |
| 12               | 7                | 1.965213                | 0.148182  | -0.074666 |
| 13               | 6                | 2.204708                | -1.071719 | -1.012046 |
| 14               | 6                | 1.868130                | -0.234494 | 1.453700  |
| 15               | 1                | 1.170400                | 0.509346  | 1.849960  |
| 16               | 6                | 3.047226                | 1.194873  | -0.296512 |
| 17               | 1                | 3.072746                | 1.386093  | -1.367873 |
| 18               | 1                | 3.974269                | 0.699058  | -0.020755 |
| 19               | 6                | 3.193564                | -0.099292 | 2.202861  |
| 20               | 1                | 3.618380                | 0.903455  | 2.183636  |
| 21               | 1                | 2.975192                | -0.336353 | 3.247887  |
| 22               | 1                | 3.943068                | -0.812536 | 1.855100  |
| 23               | 6                | 2.870358                | 2.505551  | 0.476965  |
| 24               | 1                | 2.203437                | 2.414244  | 1.337940  |
| 25               | 1                | 2.467800                | 3.286923  | -0.166021 |
| 26               | 6                | 1.912091                | -0.725396 | -2.469980 |
| 27               | 1                | 0.890561                | -0.376201 | -2.644389 |
| 28               | 1                | 2.612316                | 0.008914  | -2.876195 |
| 29               | 1                | 2.035121                | -1.648836 | -3.042643 |
| 30               | 1                | 1.480129                | -1.812709 | -0.676106 |
| 31               | 1                | 3.845366                | 2.829453  | 0.849825  |
| 32               | 6                | 1.298360                | -1.626729 | 1.711341  |
| 33               | 1                | 1.175866                | -1.709024 | 2.794670  |
| 34               | 1                | 0.318272                | -1.808755 | 1.271050  |
| 35               | 1                | 1.988569                | -2.414816 | 1.399068  |
| 36               | 6                | 3.602342                | -1.656283 | -0.869146 |
| 37               | 1                | 4.367242                | -0.996189 | -1.285627 |
| 38               | 1                | 3.862106                | -1.908602 | 0.159536  |
| 39               | 1                | 3.615369                | -2.584073 | -1.448000 |
| 40               | 1                | -5.317471               | -0.925116 | 1.065982  |
| 41               | 1                | -5.381754               | -1.026846 | -0.702974 |



|    |   |           |          |           |
|----|---|-----------|----------|-----------|
| 42 | 1 | -6.344714 | 1.375923 | 0.966328  |
| 43 | 1 | -6.423039 | 1.256277 | -0.805908 |
| 44 | 1 | -7.400244 | 0.172076 | 0.202811  |

*DAL with acylammonium ion formed with pyridine (endo):*

*Transition state 1 (TS1):*

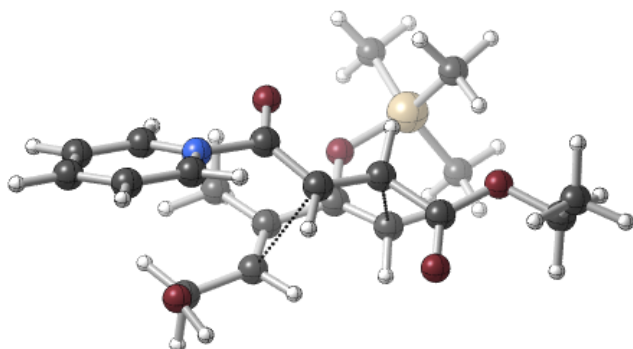

Charge = 1 Multiplicity = 1

HF = -1499.8681024 hartrees (-941182.232937024 kcal/mol)

Imaginary Frequencies: 1 (-297.0671 1/cm)

Zero-point correction = 0.478219 (Hartree/Particle)

Temperature 298.150 Kelvin. Pressure 1.00000 Atm.

Sum of electronic and thermal Free Energies =

-1499.450841 hartrees (-940920.39723591 kcal/mol)

Coordinates (from last standard orientation):

| Center Number | Atomic Number | Coordinates (Angstroms) |           |           |
|---------------|---------------|-------------------------|-----------|-----------|
|               |               | X                       | Y         | Z         |
| 1             | 6             | -1.355240               | 0.173294  | -1.003274 |
| 2             | 6             | -0.747325               | 1.241525  | -0.289047 |
| 3             | 6             | 0.633895                | 1.300955  | -0.316752 |
| 4             | 6             | -1.187315               | -0.652720 | 1.876975  |
| 5             | 6             | 1.533052                | 0.038267  | 1.187684  |
| 6             | 6             | -2.634602               | -0.816794 | 2.248355  |
| 7             | 6             | 0.977267                | -1.199868 | 0.911087  |
| 8             | 6             | 4.397319                | -2.115558 | 1.000714  |
| 9             | 6             | 3.448458                | -0.722501 | -1.623518 |
| 10            | 6             | 3.257881                | -3.780939 | -1.333078 |
| 11            | 6             | -0.384384               | -1.570836 | 1.288578  |

|    |    |           |           |           |
|----|----|-----------|-----------|-----------|
| 12 | 6  | 1.284944  | 2.521792  | 0.253564  |
| 13 | 6  | 3.242367  | 3.848862  | 0.212674  |
| 14 | 6  | 2.794661  | 5.096949  | -0.519480 |
| 15 | 6  | -0.834763 | -2.941374 | 0.859380  |
| 16 | 1  | -1.326200 | 1.920338  | 0.324222  |
| 17 | 1  | -0.772525 | 0.303943  | 2.186320  |
| 18 | 1  | 2.576381  | 0.218004  | 0.949213  |
| 19 | 1  | 1.141130  | 0.618405  | 2.013249  |
| 20 | 1  | 1.166241  | 0.791768  | -1.113316 |
| 21 | 1  | -3.099349 | -1.665423 | 1.742099  |
| 22 | 1  | -2.712900 | -1.001481 | 3.330088  |
| 23 | 1  | 5.421633  | -2.250716 | 0.633950  |
| 24 | 1  | 4.368191  | -1.177192 | 1.563093  |
| 25 | 1  | 4.182398  | -2.935642 | 1.694809  |
| 26 | 1  | 2.653504  | -0.708983 | -2.378127 |
| 27 | 1  | 3.479217  | 0.256986  | -1.134441 |
| 28 | 1  | 4.399771  | -0.855361 | -2.153621 |
| 29 | 1  | 3.066296  | -4.613740 | -0.647932 |
| 30 | 1  | 2.507807  | -3.817385 | -2.130246 |
| 31 | 1  | 4.241289  | -3.940214 | -1.789528 |
| 32 | 1  | 4.284676  | 3.609980  | -0.002698 |
| 33 | 1  | 3.108354  | 3.941733  | 1.292893  |
| 34 | 1  | 3.412293  | 5.944420  | -0.207906 |
| 35 | 1  | 2.905259  | 4.967784  | -1.599889 |
| 36 | 1  | 1.750885  | 5.328597  | -0.292770 |
| 37 | 1  | -3.143829 | 1.054802  | 2.468788  |
| 38 | 1  | -1.856517 | -3.156760 | 1.173251  |
| 39 | 1  | -0.764394 | -3.033546 | -0.230084 |
| 40 | 1  | -0.181442 | -3.709068 | 1.286223  |
| 41 | 8  | -0.816479 | -0.751259 | -1.576328 |
| 42 | 8  | 1.605706  | -2.117560 | 0.179954  |
| 43 | 8  | 0.764426  | 3.248094  | 1.070155  |
| 44 | 8  | 2.509660  | 2.691387  | -0.246360 |
| 45 | 8  | -3.395051 | 0.325879  | 1.878458  |
| 46 | 14 | 3.207061  | -2.148815 | -0.439494 |
| 47 | 6  | -3.457648 | -1.040482 | -0.969792 |
| 48 | 6  | -3.566331 | 1.310674  | -0.988266 |
| 49 | 6  | -4.833052 | -1.130937 | -0.904907 |
| 50 | 6  | -4.945038 | 1.273513  | -0.941431 |
| 51 | 6  | -5.587943 | 0.039811  | -0.885680 |
| 52 | 1  | -5.298909 | -2.108344 | -0.870358 |
| 53 | 1  | -5.499790 | 2.203717  | -0.950257 |
| 54 | 1  | -6.670652 | -0.010062 | -0.836172 |
| 55 | 7  | -2.857951 | 0.165074  | -0.993140 |
| 56 | 1  | -3.001898 | 2.233244  | -1.042918 |
| 57 | 1  | -2.793437 | -1.896050 | -1.002772 |

*Intermediate (INT):*

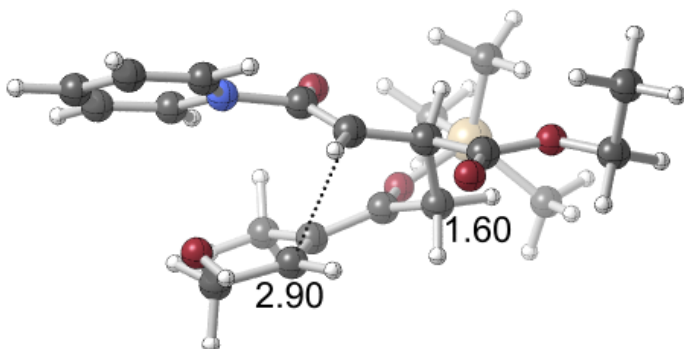

Charge = 1 Multiplicity = 1

HF = -1499.8843345 hartrees (-941192.418742095 kcal/mol)

Imaginary Frequencies: none found

Zero-point correction = 0.480252 (Hartree/Particle)

Temperature 298.150 Kelvin. Pressure 1.00000 Atm.

Sum of electronic and thermal Free Energies =

-1499.465718 hartrees (-940929.73270218 kcal/mol)

Coordinates (from last standard orientation):

| -----  |        |                         |           |           |
|--------|--------|-------------------------|-----------|-----------|
| Center | Atomic | Coordinates (Angstroms) |           |           |
| Number | Number | X                       | Y         | Z         |
| -----  |        |                         |           |           |
| 1      | 6      | -1.201483               | 0.258537  | -0.891424 |
| 2      | 6      | -0.611702               | 1.312436  | -0.252096 |
| 3      | 6      | 0.859433                | 1.193255  | -0.124291 |
| 4      | 6      | -1.264632               | -0.444087 | 1.966798  |
| 5      | 6      | 1.379626                | 0.132361  | 0.951937  |
| 6      | 6      | -2.717790               | -0.450965 | 2.349482  |
| 7      | 6      | 0.741168                | -1.207925 | 0.895910  |
| 8      | 6      | 4.268675                | -2.203147 | 0.691412  |
| 9      | 6      | 2.840457                | -1.148944 | -1.886318 |
| 10     | 6      | 2.674552                | -4.148233 | -1.116784 |
| 11     | 6      | -0.568807               | -1.479142 | 1.426914  |
| 12     | 6      | 1.518209                | 2.503375  | 0.263843  |
| 13     | 6      | 3.598488                | 3.631454  | 0.376236  |
| 14     | 6      | 3.502041                | 4.691514  | -0.701071 |
| 15     | 6      | -1.107603               | -2.866021 | 1.201412  |
| 16     | 1      | -1.144438               | 2.145636  | 0.183937  |

|    |    |           |           |           |
|----|----|-----------|-----------|-----------|
| 17 | 1  | -0.759753 | 0.490047  | 2.191542  |
| 18 | 1  | 2.457922  | 0.029045  | 0.813493  |
| 19 | 1  | 1.213727  | 0.560785  | 1.943562  |
| 20 | 1  | 1.289505  | 0.861104  | -1.073054 |
| 21 | 1  | -3.250289 | -1.291919 | 1.900081  |
| 22 | 1  | -2.804854 | -0.550750 | 3.441756  |
| 23 | 1  | 5.198741  | -2.531883 | 0.212466  |
| 24 | 1  | 4.414020  | -1.167887 | 1.016517  |
| 25 | 1  | 4.116170  | -2.825768 | 1.579530  |
| 26 | 1  | 1.829832  | -1.045076 | -2.296582 |
| 27 | 1  | 3.193783  | -0.164445 | -1.561121 |
| 28 | 1  | 3.501844  | -1.488952 | -2.692331 |
| 29 | 1  | 2.599558  | -4.851443 | -0.280655 |
| 30 | 1  | 1.776106  | -4.253442 | -1.734295 |
| 31 | 1  | 3.538700  | -4.438278 | -1.724510 |
| 32 | 1  | 4.619485  | 3.262622  | 0.486181  |
| 33 | 1  | 3.243325  | 4.002158  | 1.340249  |
| 34 | 1  | 4.140121  | 5.540405  | -0.437747 |
| 35 | 1  | 3.836740  | 4.293460  | -1.663128 |
| 36 | 1  | 2.474672  | 5.051108  | -0.802165 |
| 37 | 1  | -3.042927 | 1.473092  | 2.405138  |
| 38 | 1  | -2.133216 | -2.969546 | 1.558029  |
| 39 | 1  | -1.068135 | -3.119643 | 0.137360  |
| 40 | 1  | -0.494830 | -3.600861 | 1.733928  |
| 41 | 8  | -0.661205 | -0.798505 | -1.275373 |
| 42 | 8  | 1.375347  | -2.220216 | 0.408545  |
| 43 | 8  | 0.948986  | 3.445109  | 0.764416  |
| 44 | 8  | 2.831597  | 2.461928  | 0.017651  |
| 45 | 8  | -3.367685 | 0.720341  | 1.884520  |
| 46 | 14 | 2.857367  | -2.402457 | -0.510354 |
| 47 | 6  | -3.359163 | -0.862580 | -0.922587 |
| 48 | 6  | -3.357435 | 1.470130  | -1.176588 |
| 49 | 6  | -4.740499 | -0.893642 | -0.955094 |
| 50 | 6  | -4.737348 | 1.495010  | -1.222330 |
| 51 | 6  | -5.441875 | 0.299913  | -1.100994 |
| 52 | 1  | -5.251023 | -1.845297 | -0.867586 |
| 53 | 1  | -5.244430 | 2.442142  | -1.361660 |
| 54 | 1  | -6.526440 | 0.297911  | -1.132539 |
| 55 | 7  | -2.701989 | 0.306614  | -1.014447 |
| 56 | 1  | -2.744009 | 2.355805  | -1.286344 |
| 57 | 1  | -2.731326 | -1.741098 | -0.828238 |

Transition state 2 (TS2):

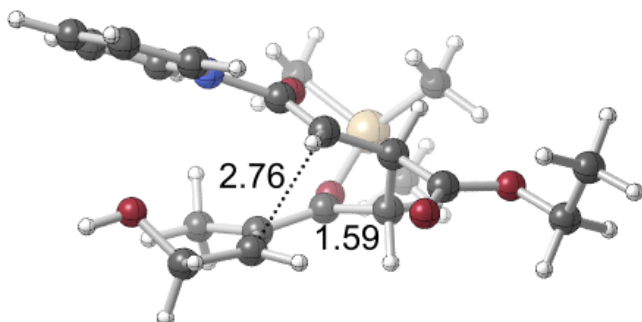

Charge = 1 Multiplicity = 1

HF = -1499.8828805 hartrees (-941191.506342555 kcal/mol)

Imaginary Frequencies: 1 (-49.0622 1/cm)

Zero-point correction = 0.480411 (Hartree/Particle)

Temperature 298.150 Kelvin. Pressure 1.00000 Atm.

Sum of electronic and thermal Free Energies =

-1499.463173 hartrees (-940928.13568923 kcal/mol)

Coordinates (from last standard orientation):

| Center Number | Atomic Number | Coordinates (Angstroms) |           |           |
|---------------|---------------|-------------------------|-----------|-----------|
|               |               | X                       | Y         | Z         |
| 1             | 6             | 0.831220                | -0.501253 | -0.871777 |
| 2             | 6             | -0.056110               | -1.446814 | -0.448111 |
| 3             | 6             | -1.448501               | -0.943081 | -0.290633 |
| 4             | 6             | 0.756946                | -0.610226 | 2.054671  |
| 5             | 6             | -1.674492               | 0.186861  | 0.809718  |
| 6             | 6             | 1.995204                | -1.313424 | 2.524951  |
| 7             | 6             | -0.546911               | 1.126818  | 1.074234  |
| 8             | 6             | -2.238910               | 4.692752  | 0.363690  |
| 9             | 6             | -2.246467               | 2.376172  | -1.694080 |
| 10            | 6             | 0.324296                | 4.010680  | -1.249559 |
| 11            | 6             | 0.642694                | 0.716057  | 1.758675  |
| 12            | 6             | -2.402112               | -2.063886 | 0.073412  |
| 13            | 6             | -4.683365               | -2.685232 | 0.157449  |
| 14            | 6             | -4.786278               | -3.772037 | -0.892474 |
| 15            | 6             | 1.714770                | 1.754302  | 1.952033  |
| 16            | 1             | -0.127696               | -1.237949 | 2.061910  |
| 17            | 1             | -2.561486               | 0.757359  | 0.533390  |
| 18            | 1             | -1.895617               | -0.308088 | 1.761752  |

|    |    |           |           |           |
|----|----|-----------|-----------|-----------|
| 19 | 1  | -1.791209 | -0.485789 | -1.224332 |
| 20 | 1  | 2.106940  | -1.127271 | 3.605510  |
| 21 | 1  | 1.848991  | -2.394111 | 2.398440  |
| 22 | 1  | -1.639179 | 5.231901  | 1.104544  |
| 23 | 1  | -2.602816 | 5.421467  | -0.369355 |
| 24 | 1  | -3.110400 | 4.269493  | 0.874862  |
| 25 | 1  | -1.654992 | 1.553266  | -2.105946 |
| 26 | 1  | -3.180581 | 1.981493  | -1.282228 |
| 27 | 1  | -2.512399 | 3.041890  | -2.525248 |
| 28 | 1  | 0.086846  | 4.675043  | -2.088793 |
| 29 | 1  | 0.922500  | 4.579271  | -0.529695 |
| 30 | 1  | 0.925426  | 3.178786  | -1.629525 |
| 31 | 1  | -5.600631 | -2.097462 | 0.216156  |
| 32 | 1  | -4.455259 | -3.096728 | 1.143509  |
| 33 | 1  | -5.615117 | -4.441613 | -0.644086 |
| 34 | 1  | -4.976942 | -3.336594 | -1.877462 |
| 35 | 1  | -3.866353 | -4.360480 | -0.934998 |
| 36 | 1  | 3.913846  | -1.265560 | 2.221825  |
| 37 | 1  | 2.622084  | 1.313549  | 2.361094  |
| 38 | 1  | 1.952194  | 2.244332  | 1.002141  |
| 39 | 1  | 1.355358  | 2.532816  | 2.633913  |
| 40 | 8  | 0.582106  | 0.722160  | -0.982733 |
| 41 | 8  | -0.698371 | 2.399150  | 0.860707  |
| 42 | 8  | -2.070151 | -3.108957 | 0.586038  |
| 43 | 8  | -3.664661 | -1.723626 | -0.191594 |
| 44 | 8  | 3.130930  | -0.872094 | 1.804183  |
| 45 | 14 | -1.240496 | 3.363329  | -0.475219 |
| 46 | 6  | 3.175177  | 0.110060  | -0.998380 |
| 47 | 6  | 2.650684  | -2.165497 | -1.214290 |
| 48 | 6  | 4.527154  | -0.163059 | -1.094678 |
| 49 | 6  | 3.986831  | -2.493624 | -1.301329 |
| 50 | 6  | 4.943711  | -1.481193 | -1.234889 |
| 51 | 1  | 5.235371  | 0.655730  | -1.050288 |
| 52 | 1  | 4.266245  | -3.531865 | -1.434801 |
| 53 | 1  | 5.999770  | -1.720391 | -1.305650 |
| 54 | 7  | 2.270279  | -0.882561 | -1.048421 |
| 55 | 1  | 1.863447  | -2.902812 | -1.297609 |
| 56 | 1  | 2.763443  | 1.103245  | -0.878002 |
| 57 | 1  | 0.171145  | -2.480933 | -0.233618 |

*Product:*

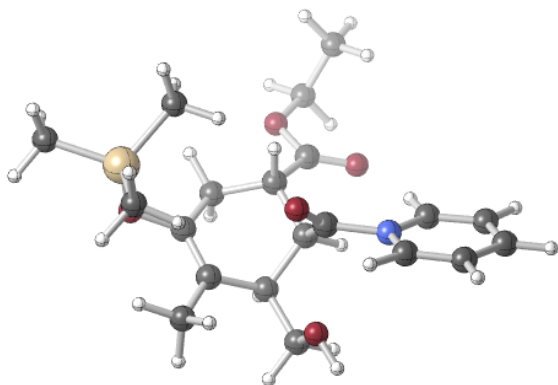

Charge = 1 Multiplicity = 1

HF = -1499.9394201 hartrees (-941226.985506951 kcal/mol)

Imaginary Frequencies: none found

Zero-point correction = 0.483631 (Hartree/Particle)

Temperature 298.150 Kelvin. Pressure 1.00000 Atm.

Sum of electronic and thermal Free Energies =

-1499.516793 hartrees (-940961.78277543 kcal/mol)

Coordinates (from last standard orientation):

| Center<br>Number | Atomic<br>Number | Coordinates (Angstroms) |           |           |
|------------------|------------------|-------------------------|-----------|-----------|
|                  |                  | X                       | Y         | Z         |
| 1                | 6                | 1.162692                | 0.791527  | -0.348331 |
| 2                | 6                | 0.826697                | -0.099513 | 0.821398  |
| 3                | 6                | -0.074447               | -1.261957 | 0.330467  |
| 4                | 6                | 0.124983                | 0.731171  | 1.943061  |
| 5                | 6                | -1.468991               | -1.255507 | 0.991728  |
| 6                | 6                | 1.027554                | 1.850964  | 2.434524  |
| 7                | 6                | -2.029025               | 0.144540  | 1.042632  |
| 8                | 6                | -5.573386               | 0.317435  | -1.057697 |
| 9                | 6                | -2.769004               | -0.461533 | -2.121765 |
| 10               | 6                | -3.335114               | 2.428620  | -1.359028 |
| 11               | 6                | -1.272753               | 1.142745  | 1.518618  |
| 12               | 6                | 0.657966                | -2.587005 | 0.472750  |
| 13               | 6                | 0.409800                | -4.939130 | 0.502728  |
| 14               | 6                | 0.894439                | -5.357907 | -0.869246 |
| 15               | 6                | -1.747146               | 2.556283  | 1.682364  |
| 16               | 1                | 0.049072                | 0.025657  | 2.784023  |
| 17               | 1                | -2.142090               | -1.913801 | 0.439846  |

|    |    |           |           |           |
|----|----|-----------|-----------|-----------|
| 18 | 1  | -1.383928 | -1.657957 | 2.010393  |
| 19 | 1  | -0.239705 | -1.157856 | -0.749856 |
| 20 | 1  | 0.523497  | 2.411721  | 3.230471  |
| 21 | 1  | 1.941530  | 1.411794  | 2.857854  |
| 22 | 1  | -6.123963 | 0.931661  | -0.336863 |
| 23 | 1  | -5.956447 | 0.551991  | -2.057406 |
| 24 | 1  | -5.800754 | -0.733332 | -0.848177 |
| 25 | 1  | -1.714096 | -0.165598 | -2.152901 |
| 26 | 1  | -2.829327 | -1.520656 | -1.848858 |
| 27 | 1  | -3.164132 | -0.359455 | -3.140022 |
| 28 | 1  | -3.564800 | 2.634466  | -2.411731 |
| 29 | 1  | -3.912639 | 3.130002  | -0.747630 |
| 30 | 1  | -2.269321 | 2.632635  | -1.206077 |
| 31 | 1  | -0.398699 | -5.580295 | 0.855948  |
| 32 | 1  | 1.217821  | -4.938690 | 1.237584  |
| 33 | 1  | 1.270139  | -6.384363 | -0.824064 |
| 34 | 1  | 0.076082  | -5.322050 | -1.594109 |
| 35 | 1  | 1.704893  | -4.709527 | -1.212289 |
| 36 | 1  | 1.940115  | 3.398854  | 1.661108  |
| 37 | 1  | -1.657335 | 2.881664  | 2.726315  |
| 38 | 1  | -1.153149 | 3.248931  | 1.076543  |
| 39 | 1  | -2.797095 | 2.643431  | 1.396472  |
| 40 | 8  | 0.395523  | 1.314385  | -1.096668 |
| 41 | 8  | -3.331328 | 0.296299  | 0.645975  |
| 42 | 8  | 1.865942  | -2.695126 | 0.546659  |
| 43 | 8  | -0.177918 | -3.618483 | 0.461323  |
| 44 | 8  | 1.347615  | 2.699688  | 1.340295  |
| 45 | 14 | -3.738411 | 0.644995  | -0.960649 |
| 46 | 6  | 2.974934  | 2.224024  | -1.105873 |
| 47 | 6  | 3.512311  | 0.009787  | -0.475633 |
| 48 | 6  | 4.291473  | 2.481294  | -1.421905 |
| 49 | 6  | 4.840016  | 0.219625  | -0.793788 |
| 50 | 6  | 5.237755  | 1.469402  | -1.261355 |
| 51 | 1  | 4.566816  | 3.462687  | -1.788452 |
| 52 | 1  | 5.545332  | -0.593941 | -0.676890 |
| 53 | 1  | 6.278594  | 1.653755  | -1.506311 |
| 54 | 7  | 2.620919  | 1.012639  | -0.626589 |
| 55 | 1  | 3.128477  | -0.945131 | -0.126917 |
| 56 | 1  | 2.173293  | 2.945368  | -1.205608 |
| 57 | 1  | 1.739950  | -0.503677 | 1.258246  |



DAL with acylammonium ion formed with pyridine (exo):

Transition state (TS):

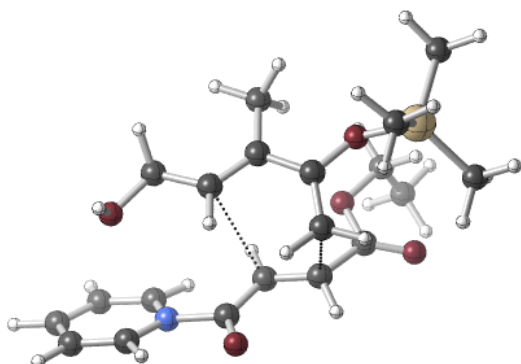

Charge = 1 Multiplicity = 1

HF = -1499.8657335 hartrees (-941180.746428585 kcal/mol)

Imaginary Frequencies: 1 (-300.5724 1/cm)

Zero-point correction = 0.477241 (Hartree/Particle)

Temperature 298.150 Kelvin. Pressure 1.00000 Atm.

Sum of electronic and thermal Free Energies =

-1499.450191 hartrees (-940919.98935441 kcal/mol)

Coordinates (from last standard orientation):

| Center<br>Number | Atomic<br>Number | Coordinates (Angstroms) |           |           |
|------------------|------------------|-------------------------|-----------|-----------|
|                  |                  | X                       | Y         | Z         |
| 1                | 6                | -2.239009               | 0.431928  | -1.405567 |
| 2                | 6                | 0.056699                | 1.072106  | -1.307164 |
| 3                | 6                | -1.177675               | 1.029631  | -0.672439 |
| 4                | 6                | -0.986278               | -1.473063 | 0.762492  |
| 5                | 6                | 0.946446                | -0.855862 | -1.326614 |
| 6                | 6                | 0.308702                | -1.218421 | 1.064801  |
| 7                | 6                | 1.283341                | -1.001132 | 0.008966  |
| 8                | 6                | -2.096019               | -1.564997 | 1.777240  |
| 9                | 6                | 4.526040                | 0.169636  | -1.534949 |
| 10               | 6                | 3.862687                | -2.816173 | -1.035342 |
| 11               | 6                | 5.184539                | -1.101136 | 1.184400  |
| 12               | 6                | 0.785967                | -1.017336 | 2.478787  |
| 13               | 6                | 1.208455                | 1.796957  | -0.691932 |
| 14               | 6                | 2.212258                | 2.479932  | 1.330448  |
| 15               | 6                | 2.150108                | 3.992421  | 1.281125  |
| 16               | 1                | 0.090687                | 1.041280  | -2.392092 |

|    |    |           |           |           |
|----|----|-----------|-----------|-----------|
| 17 | 1  | -1.275270 | 1.335575  | 0.358397  |
| 18 | 1  | -1.282821 | -1.700674 | -0.258839 |
| 19 | 1  | 1.738472  | -0.700213 | -2.053406 |
| 20 | 1  | 0.034802  | -1.294017 | -1.718758 |
| 21 | 1  | -1.844082 | -2.299571 | 2.555660  |
| 22 | 1  | -2.221593 | -0.600172 | 2.285245  |
| 23 | 1  | 5.510984  | -0.101293 | -1.936318 |
| 24 | 1  | 3.830476  | 0.245834  | -2.375699 |
| 25 | 1  | 4.608537  | 1.162812  | -1.082859 |
| 26 | 1  | 3.468347  | -3.533785 | -0.307092 |
| 27 | 1  | 3.207081  | -2.825394 | -1.912206 |
| 28 | 1  | 4.847678  | -3.175196 | -1.356298 |
| 29 | 1  | 6.219446  | -1.268944 | 0.866153  |
| 30 | 1  | 5.146304  | -0.137358 | 1.704276  |
| 31 | 1  | 4.920823  | -1.884329 | 1.903405  |
| 32 | 1  | -3.323024 | -2.786214 | 0.888461  |
| 33 | 1  | 1.052311  | 0.032517  | 2.644469  |
| 34 | 1  | 0.025181  | -1.300665 | 3.208359  |
| 35 | 1  | 1.684965  | -1.609993 | 2.670691  |
| 36 | 1  | 3.134730  | 2.097403  | 0.886534  |
| 37 | 1  | 2.127097  | 2.107028  | 2.352481  |
| 38 | 1  | 1.209683  | 4.353780  | 1.706898  |
| 39 | 1  | 2.976144  | 4.411044  | 1.863777  |
| 40 | 1  | 2.236430  | 4.350663  | 0.252335  |
| 41 | 8  | -2.171591 | -0.096388 | -2.497411 |
| 42 | 8  | 2.517175  | -0.727580 | 0.444239  |
| 43 | 8  | -3.345681 | -1.861831 | 1.184922  |
| 44 | 8  | 1.092753  | 1.890936  | 0.635891  |
| 45 | 8  | 2.147832  | 2.213452  | -1.330680 |
| 46 | 14 | 4.028937  | -1.115153 | -0.278521 |
| 47 | 6  | -4.465719 | -0.524946 | -1.245929 |
| 48 | 6  | -3.899357 | 1.107710  | 0.346349  |
| 49 | 6  | -5.708651 | -0.695078 | -0.671683 |
| 50 | 6  | -5.124566 | 0.966305  | 0.963492  |
| 51 | 6  | -6.042635 | 0.050320  | 0.454300  |
| 52 | 1  | -6.396371 | -1.412298 | -1.102882 |
| 53 | 1  | -5.353473 | 1.578789  | 1.827085  |
| 54 | 1  | -7.011046 | -0.074025 | 0.927431  |
| 55 | 7  | -3.587413 | 0.360098  | -0.732956 |
| 56 | 1  | -3.166832 | 1.829612  | 0.679604  |
| 57 | 1  | -4.124809 | -1.072264 | -2.115193 |

*Product:*

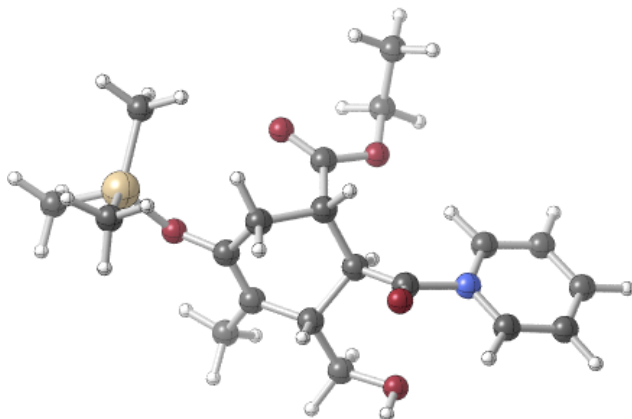

Charge = 1 Multiplicity = 1

HF = -1499.9126182 hartrees (-941210.167046682 kcal/mol)

Imaginary Frequencies: none found

Zero-point correction = 0.483794 (Hartree/Particle)

Temperature 298.150 Kelvin. Pressure 1.00000 Atm.

Sum of electronic and thermal Free Energies =

-1499.491126 hartrees (-940945.67647626 kcal/mol)

Coordinates (from last standard orientation):

| Center<br>Number | Atomic<br>Number | Coordinates (Angstroms) |           |           |
|------------------|------------------|-------------------------|-----------|-----------|
|                  |                  | X                       | Y         | Z         |
| 1                | 6                | -2.097784               | -0.791058 | -0.965127 |
| 2                | 6                | 0.069551                | 0.457140  | -0.804857 |
| 3                | 6                | -0.933817               | -0.475265 | -0.061188 |
| 4                | 6                | -0.270366               | -1.829049 | 0.350576  |
| 5                | 6                | 1.403230                | -0.246925 | -1.094685 |
| 6                | 6                | 1.107812                | -1.591387 | 0.932565  |
| 7                | 6                | 1.934733                | -0.842013 | 0.187022  |
| 8                | 6                | -1.220392               | -2.574038 | 1.285004  |
| 9                | 6                | 4.595222                | 1.675408  | -0.689888 |
| 10               | 6                | 4.586505                | -1.186188 | -1.893077 |
| 11               | 6                | 5.989021                | -0.621577 | 0.794253  |
| 12               | 6                | 1.519575                | -2.213333 | 2.238005  |
| 13               | 6                | 0.342948                | 1.730327  | -0.011825 |
| 14               | 6                | -0.662566               | 3.538902  | 1.154235  |
| 15               | 6                | -0.553098               | 4.694246  | 0.180276  |
| 16               | 1                | -0.371898               | 0.791185  | -1.752530 |

|    |    |           |           |           |
|----|----|-----------|-----------|-----------|
| 17 | 1  | -1.279123 | 0.000671  | 0.858143  |
| 18 | 1  | -0.183857 | -2.424432 | -0.572109 |
| 19 | 1  | 2.096081  | 0.483414  | -1.514794 |
| 20 | 1  | 1.236122  | -1.025217 | -1.849414 |
| 21 | 1  | -0.794109 | -3.537401 | 1.584195  |
| 22 | 1  | -1.402965 | -1.989144 | 2.192130  |
| 23 | 1  | 5.532624  | 1.932407  | -1.196043 |
| 24 | 1  | 3.764128  | 1.996967  | -1.323412 |
| 25 | 1  | 4.541984  | 2.251492  | 0.239245  |
| 26 | 1  | 4.414580  | -2.243760 | -1.666253 |
| 27 | 1  | 3.835020  | -0.867337 | -2.621660 |
| 28 | 1  | 5.568268  | -1.103128 | -2.372323 |
| 29 | 1  | 6.946054  | -0.370803 | 0.324954  |
| 30 | 1  | 5.929120  | -0.084134 | 1.745906  |
| 31 | 1  | 5.986975  | -1.694676 | 1.009142  |
| 32 | 1  | -2.419129 | -3.497596 | 0.050252  |
| 33 | 1  | 0.842615  | -1.939322 | 3.055176  |
| 34 | 1  | 1.528885  | -3.308537 | 2.180233  |
| 35 | 1  | 2.524090  | -1.881882 | 2.505003  |
| 36 | 1  | 0.207719  | 3.476275  | 1.809584  |
| 37 | 1  | -1.568232 | 3.600841  | 1.758889  |
| 38 | 1  | -1.416841 | 4.715778  | -0.489021 |
| 39 | 1  | -0.519505 | 5.636715  | 0.733215  |
| 40 | 1  | 0.359234  | 4.610509  | -0.414661 |
| 41 | 8  | -2.029267 | -1.368058 | -2.007495 |
| 42 | 8  | 3.198698  | -0.567892 | 0.591753  |
| 43 | 8  | -2.490672 | -2.753113 | 0.667704  |
| 44 | 8  | -0.791013 | 2.283388  | 0.446116  |
| 45 | 8  | 1.436692  | 2.209664  | 0.155577  |
| 46 | 14 | 4.564689  | -0.160038 | -0.322678 |
| 47 | 6  | -4.500789 | -1.115185 | -0.906706 |
| 48 | 6  | -3.630967 | 0.808794  | 0.152237  |
| 49 | 6  | -5.786239 | -0.756071 | -0.564224 |
| 50 | 6  | -4.902914 | 1.215030  | 0.505206  |
| 51 | 6  | -5.992378 | 0.422532  | 0.151815  |
| 52 | 1  | -6.610862 | -1.394248 | -0.855060 |
| 53 | 1  | -5.028602 | 2.144546  | 1.045820  |
| 54 | 1  | -6.997102 | 0.722117  | 0.429148  |
| 55 | 7  | -3.459983 | -0.339369 | -0.535499 |
| 56 | 1  | -2.739604 | 1.386759  | 0.372033  |
| 57 | 1  | -4.246660 | -2.005603 | -1.466750 |

DAL with acylammonium ion formed with 2,6-lutidine (endo):

Transition state 1 (TS1):

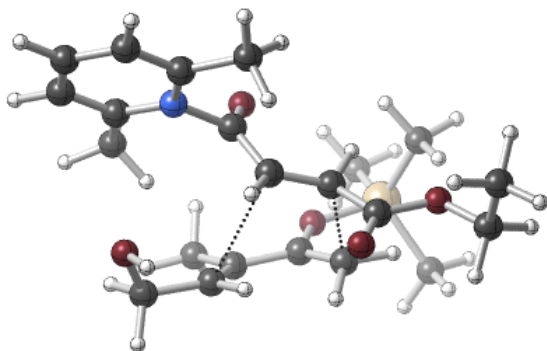

Charge = 1 Multiplicity = 1

HF = -1578.4602561 hartrees (-990499.595305311 kcal/mol)

Imaginary Frequencies: 1 (-360.8406 1/cm)

Zero-point correction = 0.534254 (Hartree/Particle)

Temperature 298.150 Kelvin. Pressure 1.00000 Atm.

Sum of electronic and thermal Free Energies =

-1577.991119 hartrees (-990205.20708369 kcal/mol)

Coordinates (from last standard orientation):

| Center<br>Number | Atomic<br>Number | Coordinates (Angstroms) |           |           |
|------------------|------------------|-------------------------|-----------|-----------|
|                  |                  | X                       | Y         | Z         |
| 1                | 6                | -1.340562               | -0.008583 | -0.808114 |
| 2                | 6                | -0.777947               | 0.883603  | 0.140782  |
| 3                | 6                | 0.565724                | 1.215518  | 0.008893  |
| 4                | 6                | -0.414922               | -1.172889 | 2.190090  |
| 5                | 6                | 1.938228                | 0.116391  | 1.158855  |
| 6                | 6                | -1.707856               | -1.645867 | 2.792403  |
| 7                | 6                | 1.619185                | -1.206201 | 0.878365  |
| 8                | 6                | 5.091061                | -1.308650 | 0.239130  |
| 9                | 6                | 3.366477                | -0.082417 | -2.047956 |
| 10               | 6                | 3.880341                | -3.122243 | -1.952798 |
| 11               | 6                | 0.477178                | -1.894967 | 1.469881  |
| 12               | 6                | 0.999893                | 2.492374  | 0.661044  |
| 13               | 6                | 2.628889                | 4.204424  | 0.646968  |
| 14               | 6                | 1.877015                | 5.402103  | 0.104729  |
| 15               | 6                | 0.334234                | -3.353946 | 1.122283  |
| 16               | 1                | -1.410972               | 1.382583  | 0.864337  |
| 17               | 1                | -0.202023               | -0.129213 | 2.405251  |
| 18               | 1                | 2.850258                | 0.532522  | 0.743325  |

|    |    |           |           |           |
|----|----|-----------|-----------|-----------|
| 19 | 1  | 1.648228  | 0.521521  | 2.120832  |
| 20 | 1  | 1.065340  | 0.962226  | -0.921359 |
| 21 | 1  | -1.936158 | -2.681147 | 2.535052  |
| 22 | 1  | -1.639429 | -1.585201 | 3.887658  |
| 23 | 1  | 5.021394  | -0.367380 | 0.793253  |
| 24 | 1  | 5.140293  | -2.128883 | 0.963716  |
| 25 | 1  | 6.037474  | -1.297462 | -0.314551 |
| 26 | 1  | 2.427687  | -0.198451 | -2.601511 |
| 27 | 1  | 3.330753  | 0.862143  | -1.494174 |
| 28 | 1  | 4.175148  | -0.002981 | -2.784744 |
| 29 | 1  | 4.052591  | -3.987469 | -1.303725 |
| 30 | 1  | 2.986329  | -3.321364 | -2.553334 |
| 31 | 1  | 4.732002  | -3.040496 | -2.637137 |
| 32 | 1  | 3.675853  | 4.214429  | 0.341375  |
| 33 | 1  | 2.571600  | 4.149963  | 1.736499  |
| 34 | 1  | 2.329017  | 6.321316  | 0.488894  |
| 35 | 1  | 1.924536  | 5.423972  | -0.987664 |
| 36 | 1  | 0.829425  | 5.376650  | 0.415778  |
| 37 | 1  | -2.722025 | 0.020205  | 2.701464  |
| 38 | 1  | 0.221339  | -3.481188 | 0.040415  |
| 39 | 1  | 1.235641  | -3.902094 | 1.414370  |
| 40 | 1  | -0.518493 | -3.815939 | 1.620807  |
| 41 | 8  | -0.786304 | -0.737682 | -1.602369 |
| 42 | 8  | 2.256491  | -1.912691 | -0.045980 |
| 43 | 8  | 0.421771  | 3.008282  | 1.591410  |
| 44 | 8  | 2.108157  | 2.974602  | 0.095706  |
| 45 | 8  | -2.799051 | -0.866719 | 2.313624  |
| 46 | 14 | 3.677496  | -1.565615 | -0.954973 |
| 47 | 6  | -3.512506 | -1.167337 | -0.585170 |
| 48 | 6  | -3.509301 | 1.149677  | -1.178269 |
| 49 | 6  | -4.900077 | -1.174331 | -0.604617 |
| 50 | 6  | -4.894631 | 1.145919  | -1.208476 |
| 51 | 6  | -5.596847 | -0.014684 | -0.906767 |
| 52 | 1  | -5.415191 | -2.102187 | -0.384652 |
| 53 | 1  | -5.409860 | 2.060026  | -1.479768 |
| 54 | 1  | -6.682005 | -0.016334 | -0.923834 |
| 55 | 7  | -2.860903 | -0.001723 | -0.839439 |
| 56 | 6  | -2.736705 | 2.381602  | -1.551168 |
| 57 | 1  | -2.370213 | 2.908498  | -0.665535 |
| 58 | 1  | -1.878897 | 2.145069  | -2.185300 |
| 59 | 1  | -3.402009 | 3.051814  | -2.098234 |
| 60 | 6  | -2.736365 | -2.417155 | -0.323119 |
| 61 | 1  | -2.416618 | -2.863376 | -1.269977 |
| 62 | 1  | -1.847612 | -2.214515 | 0.270284  |
| 63 | 1  | -3.373587 | -3.126980 | 0.206943  |

Intermediate (INT):

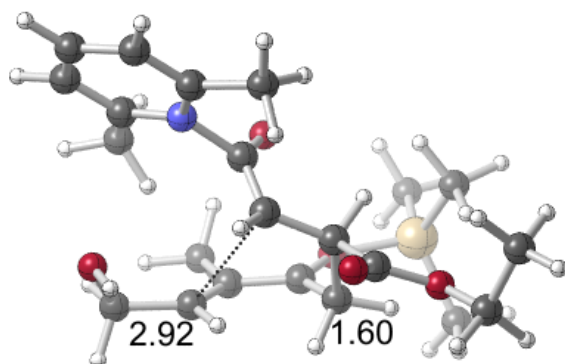

Charge = 1 Multiplicity = 1

HF = -1578.449279 hartrees (-990492.70706529 kcal/mol)

Imaginary Frequencies: none found

Zero-point correction = 0.536360 (Hartree/Particle)

Temperature 298.150 Kelvin. Pressure 1.00000 Atm.

Sum of electronic and thermal Free Energies =

-1577.979898 hartrees (-990198.16579398 kcal/mol)

Coordinates (from last standard orientation):

| Center Number | Atomic Number | Coordinates (Angstroms) |           |           |
|---------------|---------------|-------------------------|-----------|-----------|
|               |               | X                       | Y         | Z         |
| 1             | 6             | -1.256624               | 0.104618  | -0.619897 |
| 2             | 6             | -0.727411               | 0.878055  | 0.380122  |
| 3             | 6             | 0.745341                | 1.039813  | 0.345891  |
| 4             | 6             | -0.627223               | -1.449269 | 2.136504  |
| 5             | 6             | 1.644098                | -0.005431 | 1.151657  |
| 6             | 6             | -1.945472               | -1.914215 | 2.691323  |
| 7             | 6             | 1.333808                | -1.402127 | 0.777003  |
| 8             | 6             | 4.893267                | -1.580381 | 0.211208  |
| 9             | 6             | 3.201658                | -0.030692 | -1.926046 |
| 10            | 6             | 3.575864                | -3.092964 | -2.163284 |
| 11            | 6             | 0.204105                | -2.122262 | 1.295410  |
| 12            | 6             | 1.164154                | 2.430042  | 0.806082  |
| 13            | 6             | 3.008914                | 3.899685  | 1.024353  |
| 14            | 6             | 2.776435                | 4.911638  | -0.080096 |
| 15            | 6             | -0.010425               | -3.513932 | 0.762526  |
| 16            | 1             | -1.333494               | 1.519119  | 1.005408  |
| 17            | 1             | -0.337642               | -0.471276 | 2.502184  |

|    |    |           |           |           |
|----|----|-----------|-----------|-----------|
| 18 | 1  | 2.687949  | 0.219007  | 0.929168  |
| 19 | 1  | 1.493492  | 0.150233  | 2.220573  |
| 20 | 1  | 1.080712  | 0.937151  | -0.692644 |
| 21 | 1  | -2.245414 | -2.886866 | 2.300203  |
| 22 | 1  | -1.851377 | -2.007833 | 3.782433  |
| 23 | 1  | 4.799256  | -0.763245 | 0.932174  |
| 24 | 1  | 4.953934  | -2.522980 | 0.763435  |
| 25 | 1  | 5.839033  | -1.443787 | -0.323969 |
| 26 | 1  | 2.219512  | -0.040543 | -2.410545 |
| 27 | 1  | 3.272920  | 0.853062  | -1.283744 |
| 28 | 1  | 3.959368  | 0.066514  | -2.711497 |
| 29 | 1  | 3.639103  | -4.028482 | -1.599719 |
| 30 | 1  | 2.687281  | -3.132253 | -2.800466 |
| 31 | 1  | 4.455877  | -3.024586 | -2.810382 |
| 32 | 1  | 4.071597  | 3.721039  | 1.191452  |
| 33 | 1  | 2.541506  | 4.210844  | 1.960872  |
| 34 | 1  | 3.238506  | 5.864605  | 0.191495  |
| 35 | 1  | 3.221131  | 4.565094  | -1.016592 |
| 36 | 1  | 1.707105  | 5.075830  | -0.231320 |
| 37 | 1  | -2.792216 | -0.154131 | 2.758281  |
| 38 | 1  | -0.130225 | -3.479954 | -0.324747 |
| 39 | 1  | 0.860393  | -4.139051 | 0.979626  |
| 40 | 1  | -0.886921 | -3.990606 | 1.201505  |
| 41 | 8  | -0.693043 | -0.686792 | -1.389990 |
| 42 | 8  | 2.054311  | -2.025202 | -0.087771 |
| 43 | 8  | 0.415488  | 3.272876  | 1.240662  |
| 44 | 8  | 2.482474  | 2.606830  | 0.656303  |
| 45 | 8  | -2.977789 | -1.007981 | 2.338640  |
| 46 | 14 | 3.494889  | -1.632666 | -1.019405 |
| 47 | 6  | -3.570465 | -0.813083 | -0.652030 |
| 48 | 6  | -3.253534 | 1.497483  | -1.141036 |
| 49 | 6  | -4.946376 | -0.652909 | -0.750854 |
| 50 | 6  | -4.625848 | 1.666162  | -1.253321 |
| 51 | 6  | -5.481282 | 0.593600  | -1.036115 |
| 52 | 1  | -5.581329 | -1.519445 | -0.609332 |
| 53 | 1  | -5.009225 | 2.642565  | -1.524382 |
| 54 | 1  | -6.555314 | 0.725438  | -1.113367 |
| 55 | 7  | -2.768370 | 0.270921  | -0.800183 |
| 56 | 6  | -2.318841 | 2.634152  | -1.450876 |
| 57 | 1  | -1.927053 | 3.103299  | -0.545443 |
| 58 | 1  | -1.465744 | 2.288823  | -2.039296 |
| 59 | 1  | -2.867404 | 3.383169  | -2.024248 |
| 60 | 6  | -2.967003 | -2.165271 | -0.446242 |
| 61 | 1  | -2.665608 | -2.580022 | -1.412748 |
| 62 | 1  | -2.079387 | -2.110700 | 0.176218  |
| 63 | 1  | -3.704538 | -2.823280 | 0.015943  |



Transition state 2 (TS2):

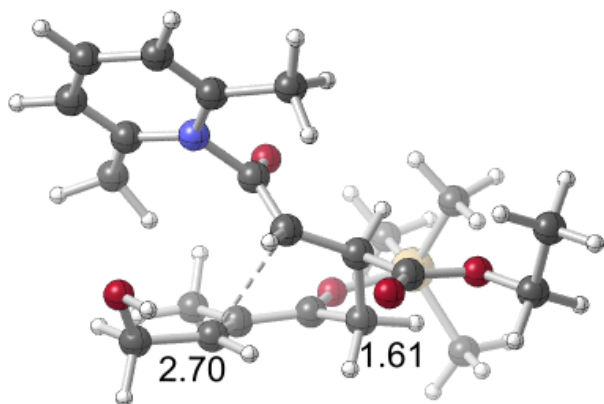

Charge = 1 Multiplicity = 1

HF = -1578.4733262 hartrees (-990507.796923762 kcal/mol)

Imaginary Frequencies: 1 (-66.1112 1/cm)

Zero-point correction = 0.536888 (Hartree/Particle)

Temperature 298.150 Kelvin. Pressure 1.00000 Atm.

Sum of electronic and thermal Free Energies =

-1577.999511 hartrees (-990210.47314761 kcal/mol)

Coordinates (from last standard orientation):

| Center Number | Atomic Number | Coordinates (Angstroms) |           |           |
|---------------|---------------|-------------------------|-----------|-----------|
|               |               | X                       | Y         | Z         |
| 1             | 6             | -1.243256               | -0.041929 | -0.610838 |
| 2             | 6             | -0.748507               | 0.774677  | 0.384619  |
| 3             | 6             | 0.700211                | 1.076801  | 0.296622  |
| 4             | 6             | -0.482166               | -1.256824 | 2.138721  |
| 5             | 6             | 1.736688                | 0.137458  | 1.086778  |
| 6             | 6             | -1.788480               | -1.728066 | 2.719834  |
| 7             | 6             | 1.500351                | -1.295300 | 0.826127  |
| 8             | 6             | 5.063084                | -1.258347 | 0.185970  |
| 9             | 6             | 3.202325                | -0.062620 | -2.024171 |
| 10            | 6             | 3.830188                | -3.093924 | -1.984838 |
| 11            | 6             | 0.395101                | -1.994176 | 1.384659  |
| 12            | 6             | 0.997026                | 2.482416  | 0.790732  |
| 13            | 6             | 2.579133                | 4.242260  | 0.720304  |
| 14            | 6             | 1.871130                | 5.308915  | -0.089035 |
| 15            | 6             | 0.216711                | -3.432214 | 0.972488  |
| 16            | 1             | -1.394373               | 1.393000  | 0.993351  |
| 17            | 1             | -0.182095               | -0.283091 | 2.506822  |
| 18            | 1             | 2.740242                | 0.429762  | 0.774234  |

|    |    |           |           |           |
|----|----|-----------|-----------|-----------|
| 19 | 1  | 1.643021  | 0.348575  | 2.154439  |
| 20 | 1  | 1.021218  | 1.005937  | -0.747346 |
| 21 | 1  | -2.053782 | -2.733233 | 2.391509  |
| 22 | 1  | -1.675796 | -1.755141 | 3.814191  |
| 23 | 1  | 5.157909  | -2.086742 | 0.896124  |
| 24 | 1  | 5.996596  | -1.202764 | -0.386507 |
| 25 | 1  | 4.967967  | -0.326891 | 0.753341  |
| 26 | 1  | 2.213424  | -0.183204 | -2.480246 |
| 27 | 1  | 3.218067  | 0.876324  | -1.460295 |
| 28 | 1  | 3.933886  | 0.027332  | -2.836272 |
| 29 | 1  | 4.034531  | -3.957298 | -1.342885 |
| 30 | 1  | 2.921638  | -3.303163 | -2.559343 |
| 31 | 1  | 4.660206  | -2.996611 | -2.693244 |
| 32 | 1  | 3.655818  | 4.254236  | 0.544178  |
| 33 | 1  | 2.386991  | 4.352642  | 1.790017  |
| 34 | 1  | 2.242458  | 6.295792  | 0.202838  |
| 35 | 1  | 2.060663  | 5.169706  | -1.157065 |
| 36 | 1  | 0.793150  | 5.279265  | 0.089487  |
| 37 | 1  | -2.692720 | 0.000518  | 2.691099  |
| 38 | 1  | 0.101144  | -3.508325 | -0.113629 |
| 39 | 1  | 1.103268  | -4.012448 | 1.247343  |
| 40 | 1  | -0.646973 | -3.894321 | 1.452023  |
| 41 | 8  | -0.634927 | -0.802665 | -1.368319 |
| 42 | 8  | 2.256992  | -1.961322 | 0.008276  |
| 43 | 8  | 0.294663  | 3.114166  | 1.545681  |
| 44 | 8  | 2.163754  | 2.921612  | 0.308243  |
| 45 | 8  | -2.866518 | -0.888518 | 2.340781  |
| 46 | 14 | 3.636718  | -1.544977 | -0.979816 |
| 47 | 6  | -3.501193 | -1.088653 | -0.620007 |
| 48 | 6  | -3.305846 | 1.213423  | -1.202609 |
| 49 | 6  | -4.880412 | -1.017208 | -0.767552 |
| 50 | 6  | -4.680313 | 1.292324  | -1.366564 |
| 51 | 6  | -5.477912 | 0.179334  | -1.129541 |
| 52 | 1  | -5.464100 | -1.915214 | -0.599808 |
| 53 | 1  | -5.109240 | 2.232433  | -1.693314 |
| 54 | 1  | -6.554843 | 0.242332  | -1.248385 |
| 55 | 7  | -2.759140 | 0.032302  | -0.797061 |
| 56 | 6  | -2.435544 | 2.396062  | -1.517963 |
| 57 | 1  | -2.093384 | 2.903229  | -0.612089 |
| 58 | 1  | -1.554169 | 2.098703  | -2.092020 |
| 59 | 1  | -3.021717 | 3.101481  | -2.109929 |
| 60 | 6  | -2.832964 | -2.391109 | -0.321154 |
| 61 | 1  | -2.607133 | -2.905201 | -1.261604 |
| 62 | 1  | -1.897483 | -2.253469 | 0.210915  |
| 63 | 1  | -3.508303 | -3.016561 | 0.266138  |

*Product:*

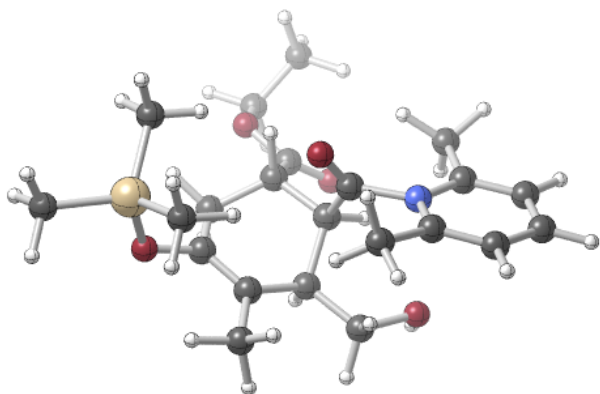

Charge = 1 Multiplicity = 1

HF = -1578.5331871 hartrees (-990545.360237121 kcal/mol)

Imaginary Frequencies: none found

Zero-point correction = 0.540279 (Hartree/Particle)

Temperature 298.150 Kelvin. Pressure 1.00000 Atm.

Sum of electronic and thermal Free Energies =

-1578.055823 hartrees (-990245.80949073 kcal/mol)

Coordinates (from last standard orientation):

| Center<br>Number | Atomic<br>Number | Coordinates (Angstroms) |           |           |
|------------------|------------------|-------------------------|-----------|-----------|
|                  |                  | X                       | Y         | Z         |
| 1                | 6                | -0.938848               | -0.414758 | -0.697654 |
| 2                | 6                | -0.669988               | 0.494475  | 0.470708  |
| 3                | 6                | 0.398133                | 1.528537  | 0.073923  |
| 4                | 6                | -0.252906               | -0.281607 | 1.761801  |
| 5                | 6                | 1.762716                | 1.315764  | 0.781273  |
| 6                | 6                | -1.342134               | -1.234925 | 2.265678  |
| 7                | 6                | 2.053596                | -0.137502 | 1.058816  |
| 8                | 6                | 5.660947                | -1.425656 | -0.481078 |
| 9                | 6                | 3.391433                | 0.058768  | -1.989942 |
| 10               | 6                | 2.921227                | -2.780654 | -0.973385 |
| 11               | 6                | 1.107643                | -0.927518 | 1.587632  |
| 12               | 6                | -0.103831               | 2.935341  | 0.350235  |
| 13               | 6                | 0.419480                | 5.228067  | 0.093746  |
| 14               | 6                | -0.549224               | 5.680575  | -0.979192 |
| 15               | 6                | 1.379656                | -2.325070 | 2.071808  |
| 16               | 1                | -1.593079               | 1.006473  | 0.733156  |
| 17               | 1                | -0.179339               | 0.528117  | 2.507177  |

|    |    |           |           |           |
|----|----|-----------|-----------|-----------|
| 18 | 1  | 2.560597  | 1.756682  | 0.180951  |
| 19 | 1  | 1.751613  | 1.852136  | 1.740760  |
| 20 | 1  | 0.579974  | 1.470864  | -1.004241 |
| 21 | 1  | -1.365795 | -2.159319 | 1.682428  |
| 22 | 1  | -1.114281 | -1.521194 | 3.299857  |
| 23 | 1  | 5.891082  | -2.130350 | 0.325431  |
| 24 | 1  | 6.082161  | -1.828622 | -1.408930 |
| 25 | 1  | 6.173457  | -0.482728 | -0.262135 |
| 26 | 1  | 2.309502  | 0.234412  | -2.028994 |
| 27 | 1  | 3.895848  | 1.020933  | -1.849644 |
| 28 | 1  | 3.693775  | -0.334560 | -2.968103 |
| 29 | 1  | 3.144910  | -3.542070 | -0.218737 |
| 30 | 1  | 1.835680  | -2.626941 | -0.999960 |
| 31 | 1  | 3.220338  | -3.179554 | -1.950559 |
| 32 | 1  | 1.369865  | 5.759205  | 0.025615  |
| 33 | 1  | 0.004278  | 5.358788  | 1.095377  |
| 34 | 1  | -0.750404 | 6.749607  | -0.862236 |
| 35 | 1  | -0.124888 | 5.516484  | -1.973795 |
| 36 | 1  | -1.496939 | 5.141218  | -0.900582 |
| 37 | 1  | -2.700871 | 0.058700  | 2.799618  |
| 38 | 1  | 0.813414  | -3.091615 | 1.529682  |
| 39 | 1  | 2.441939  | -2.556567 | 1.969256  |
| 40 | 1  | 1.114001  | -2.426585 | 3.131217  |
| 41 | 8  | -0.178116 | -0.721072 | -1.565671 |
| 42 | 8  | 3.343704  | -0.544553 | 0.856542  |
| 43 | 8  | -1.146592 | 3.212191  | 0.901961  |
| 44 | 8  | 0.773145  | 3.839108  | -0.085696 |
| 45 | 8  | -2.641115 | -0.676685 | 2.167204  |
| 46 | 14 | 3.820738  | -1.170617 | -0.645837 |
| 47 | 6  | -2.413577 | -2.379793 | -0.720230 |
| 48 | 6  | -3.394727 | -0.192419 | -0.834078 |
| 49 | 6  | -3.676820 | -2.941888 | -0.653324 |
| 50 | 6  | -4.659177 | -0.757267 | -0.796150 |
| 51 | 6  | -4.805380 | -2.130959 | -0.671714 |
| 52 | 1  | -3.759151 | -4.020960 | -0.599183 |
| 53 | 1  | -5.518476 | -0.100571 | -0.870627 |
| 54 | 1  | -5.795057 | -2.572618 | -0.618858 |
| 55 | 7  | -2.313045 | -1.017484 | -0.749086 |
| 56 | 6  | -3.224133 | 1.285489  | -1.035003 |
| 57 | 1  | -3.290521 | 1.827243  | -0.086166 |
| 58 | 1  | -2.279774 | 1.544064  | -1.521230 |
| 59 | 1  | -4.039937 | 1.632691  | -1.672537 |
| 60 | 6  | -1.187047 | -3.238441 | -0.794005 |
| 61 | 1  | -0.814891 | -3.264590 | -1.822884 |
| 62 | 1  | -0.374822 | -2.879151 | -0.158675 |
| 63 | 1  | -1.453655 | -4.251844 | -0.491032 |

DAL with acylammonium ion formed with 2,6-lutidine (exo):

Transition state 1 (TS1):

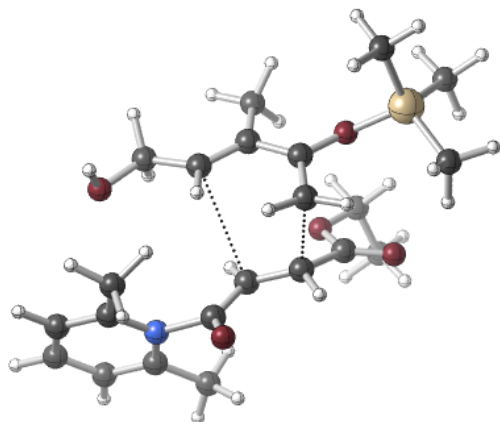

Charge = 1 Multiplicity = 1

HF = -1578.4594581 hartrees (-990499.094552331 kcal/mol)

Imaginary Frequencies: 1 (-364.3541 1/cm)

Zero-point correction = 0.533503 (Hartree/Particle)

Temperature 298.150 Kelvin. Pressure 1.00000 Atm.

Sum of electronic and thermal Free Energies =

-1577.990860 hartrees (-990205.0445586 kcal/mol)

Coordinates (from last standard orientation):

| Center<br>Number | Atomic<br>Number | Coordinates (Angstroms) |           |           |
|------------------|------------------|-------------------------|-----------|-----------|
|                  |                  | X                       | Y         | Z         |
| 1                | 6                | -2.172011               | 0.369589  | -1.378111 |
| 2                | 6                | 0.166587                | 0.899399  | -1.144820 |
| 3                | 6                | -1.073327               | 0.703274  | -0.542624 |
| 4                | 6                | -0.388912               | -1.847227 | 0.879864  |
| 5                | 6                | 1.245321                | -0.879908 | -1.333000 |
| 6                | 6                | 0.889986                | -1.463311 | 1.086627  |
| 7                | 6                | 1.712762                | -1.033063 | -0.034482 |
| 8                | 6                | -1.374475               | -2.189176 | 1.964693  |
| 9                | 6                | 4.464429                | 0.080102  | -2.160002 |
| 10               | 6                | 4.720565                | -2.571986 | -0.595946 |
| 11               | 6                | 5.583907                | 0.125976  | 0.705594  |
| 12               | 6                | 1.498869                | -1.351984 | 2.459004  |
| 13               | 6                | 1.236109                | 1.681273  | -0.450061 |
| 14               | 6                | 2.071965                | 2.392023  | 1.641778  |

|    |    |           |           |           |
|----|----|-----------|-----------|-----------|
| 15 | 6  | 1.863929  | 3.892094  | 1.602581  |
| 16 | 1  | 0.192842  | 1.009204  | -2.225722 |
| 17 | 1  | -1.224103 | 0.850219  | 0.518600  |
| 18 | 1  | -0.767925 | -1.955935 | -0.131513 |
| 19 | 1  | 1.951852  | -0.586075 | -2.102716 |
| 20 | 1  | 0.387592  | -1.445596 | -1.676963 |
| 21 | 1  | -0.966586 | -2.970323 | 2.622765  |
| 22 | 1  | -1.560035 | -1.311636 | 2.595514  |
| 23 | 1  | 5.507704  | 0.300177  | -2.418711 |
| 24 | 1  | 4.059957  | -0.565310 | -2.946875 |
| 25 | 1  | 3.911119  | 1.024788  | -2.160827 |
| 26 | 1  | 4.697883  | -3.042226 | 0.393166  |
| 27 | 1  | 3.954213  | -3.050142 | -1.217183 |
| 28 | 1  | 5.695009  | -2.784597 | -1.050117 |
| 29 | 1  | 6.626701  | -0.035097 | 0.409165  |
| 30 | 1  | 5.406015  | 1.206851  | 0.716510  |
| 31 | 1  | 5.462196  | -0.253329 | 1.725748  |
| 32 | 1  | -2.531963 | -3.451446 | 1.042605  |
| 33 | 1  | 1.757036  | -0.311714 | 2.681710  |
| 34 | 1  | 0.817484  | -1.711282 | 3.232093  |
| 35 | 1  | 2.425228  | -1.932180 | 2.520682  |
| 36 | 1  | 3.055085  | 2.103427  | 1.261792  |
| 37 | 1  | 1.951180  | 2.002198  | 2.653718  |
| 38 | 1  | 0.859655  | 4.148863  | 1.952237  |
| 39 | 1  | 2.591789  | 4.377193  | 2.259783  |
| 40 | 1  | 1.999386  | 4.280144  | 0.590288  |
| 41 | 8  | -2.202999 | 0.133429  | -2.566483 |
| 42 | 8  | 2.910812  | -0.561464 | 0.313699  |
| 43 | 8  | -2.632975 | -2.572426 | 1.442268  |
| 44 | 8  | 1.062551  | 1.705125  | 0.872141  |
| 45 | 8  | 2.161433  | 2.206346  | -1.029187 |
| 46 | 14 | 4.430709  | -0.731417 | -0.477802 |
| 47 | 6  | -4.140197 | -0.905275 | -0.618980 |
| 48 | 6  | -4.013547 | 1.422559  | -0.075679 |
| 49 | 6  | -5.334079 | -1.005456 | 0.081098  |
| 50 | 6  | -5.215076 | 1.331853  | 0.607843  |
| 51 | 6  | -5.871286 | 0.110761  | 0.704576  |
| 52 | 1  | -5.832932 | -1.966883 | 0.117955  |
| 53 | 1  | -5.626549 | 2.230667  | 1.052184  |
| 54 | 1  | -6.807292 | 0.035888  | 1.248579  |
| 55 | 7  | -3.500719 | 0.294589  | -0.643456 |
| 56 | 6  | -3.303317 | 2.735592  | -0.222785 |
| 57 | 1  | -2.484948 | 2.828694  | 0.496993  |
| 58 | 1  | -2.891170 | 2.864277  | -1.226509 |
| 59 | 1  | -4.019081 | 3.537102  | -0.032303 |
| 60 | 6  | -3.589541 | -2.069908 | -1.381958 |

|    |   |           |           |           |
|----|---|-----------|-----------|-----------|
| 61 | 1 | -3.782216 | -1.934651 | -2.450090 |
| 62 | 1 | -2.513885 | -2.186548 | -1.247147 |
| 63 | 1 | -4.088687 | -2.978285 | -1.042765 |

*Intermediate (INT):*

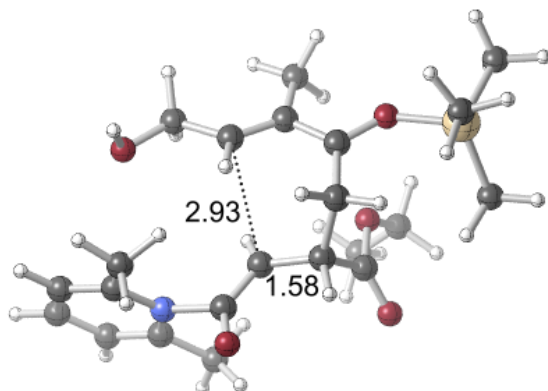

Charge = 1 Multiplicity = 1

HF = -1578.474036 hartrees (-990508.24233036 kcal/mol)

Imaginary Frequencies: none found

Zero-point correction = 0.536237 (Hartree/Particle)

Temperature 298.150 Kelvin. Pressure 1.00000 Atm.

Sum of electronic and thermal Free Energies =

-1578.003152 hartrees (-990212.75791152 kcal/mol)

Coordinates (from last standard orientation):

| Center Number | Atomic Number | Coordinates (Angstroms) |           |           |
|---------------|---------------|-------------------------|-----------|-----------|
|               |               | X                       | Y         | Z         |
| 1             | 6             | -2.083170               | 0.518586  | -1.399358 |
| 2             | 6             | 0.376851                | 0.625848  | -1.212131 |
| 3             | 6             | -0.970674               | 0.432083  | -0.597413 |
| 4             | 6             | -0.271771               | -2.114757 | 0.669989  |
| 5             | 6             | 1.322953                | -0.641091 | -1.288641 |
| 6             | 6             | 0.970442                | -1.704677 | 1.029479  |
| 7             | 6             | 1.821162                | -1.128027 | 0.024618  |
| 8             | 6             | -1.307683               | -2.630092 | 1.624462  |
| 9             | 6             | 4.322760                | 1.353463  | -0.913462 |
| 10            | 6             | 4.698041                | -1.575717 | -1.956207 |
| 11            | 6             | 5.787205                | -0.746698 | 0.822748  |

|    |    |           |           |           |
|----|----|-----------|-----------|-----------|
| 12 | 6  | 1.512651  | -1.779622 | 2.431709  |
| 13 | 6  | 1.029330  | 1.796942  | -0.506671 |
| 14 | 6  | 1.977225  | 2.477779  | 1.563648  |
| 15 | 6  | 0.811503  | 3.086346  | 2.315047  |
| 16 | 1  | 0.229224  | 0.926168  | -2.252586 |
| 17 | 1  | -1.079065 | 0.381548  | 0.479406  |
| 18 | 1  | -0.566680 | -2.104309 | -0.373811 |
| 19 | 1  | 2.168701  | -0.398576 | -1.934778 |
| 20 | 1  | 0.744649  | -1.425365 | -1.783403 |
| 21 | 1  | -0.915985 | -3.508603 | 2.158654  |
| 22 | 1  | -1.508857 | -1.865614 | 2.384876  |
| 23 | 1  | 5.238303  | 1.679119  | -1.423429 |
| 24 | 1  | 3.484784  | 1.567950  | -1.584365 |
| 25 | 1  | 4.217289  | 1.964378  | -0.011399 |
| 26 | 1  | 5.736444  | -1.529939 | -2.305485 |
| 27 | 1  | 4.489800  | -2.615681 | -1.681173 |
| 28 | 1  | 4.054866  | -1.306943 | -2.799636 |
| 29 | 1  | 6.779316  | -0.452826 | 0.462851  |
| 30 | 1  | 5.569151  | -0.162217 | 1.723047  |
| 31 | 1  | 5.827395  | -1.804654 | 1.101990  |
| 32 | 1  | -2.435086 | -3.727859 | 0.482761  |
| 33 | 1  | 0.768278  | -2.164868 | 3.130276  |
| 34 | 1  | 2.390228  | -2.432295 | 2.473508  |
| 35 | 1  | 1.827067  | -0.787121 | 2.772085  |
| 36 | 1  | 2.504550  | 3.225138  | 0.966950  |
| 37 | 1  | 2.683800  | 1.988166  | 2.237256  |
| 38 | 1  | 0.264355  | 2.313467  | 2.863676  |
| 39 | 1  | 1.177286  | 3.827579  | 3.031692  |
| 40 | 1  | 0.127992  | 3.585353  | 1.621873  |
| 41 | 8  | -2.259007 | 0.666027  | -2.609283 |
| 42 | 8  | 3.051948  | -0.979530 | 0.360637  |
| 43 | 8  | -2.537730 | -2.907983 | 0.992358  |
| 44 | 8  | 1.510358  | 1.427749  | 0.693448  |
| 45 | 8  | 1.057892  | 2.930750  | -0.922922 |
| 46 | 14 | 4.506228  | -0.447698 | -0.486709 |
| 47 | 6  | -4.061150 | -0.820668 | -0.737338 |
| 48 | 6  | -3.842520 | 1.365516  | 0.182762  |
| 49 | 6  | -5.239793 | -1.012255 | -0.029002 |
| 50 | 6  | -5.025873 | 1.194788  | 0.888298  |
| 51 | 6  | -5.722080 | -0.004062 | 0.793658  |
| 52 | 1  | -5.766153 | -1.953235 | -0.139298 |
| 53 | 1  | -5.390544 | 2.011376  | 1.500827  |
| 54 | 1  | -6.644948 | -0.145548 | 1.347309  |
| 55 | 7  | -3.387712 | 0.344474  | -0.584788 |
| 56 | 6  | -3.072364 | 2.651486  | 0.232688  |
| 57 | 1  | -2.189464 | 2.559115  | 0.871385  |



|    |   |           |           |           |
|----|---|-----------|-----------|-----------|
| 58 | 1 | -2.735623 | 2.946460  | -0.764688 |
| 59 | 1 | -3.715577 | 3.434110  | 0.639071  |
| 60 | 6 | -3.541936 | -1.842048 | -1.699787 |
| 61 | 1 | -3.703981 | -1.497771 | -2.724934 |
| 62 | 1 | -2.470097 | -2.000379 | -1.565479 |
| 63 | 1 | -4.068975 | -2.784521 | -1.546058 |

*Transition state 2 (TS2):*

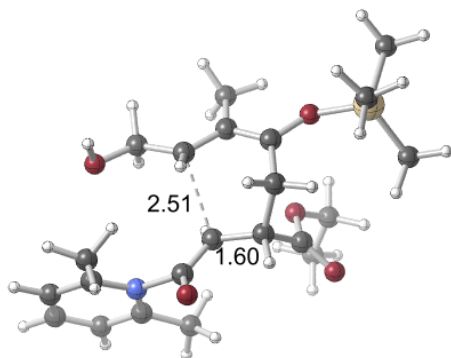

Charge = 1 Multiplicity = 1

HF = -1579.0760202 hartrees (-990885.993435702 kcal/mol)

Imaginary Frequencies: 1 (-127.2151 1/cm)

Zero-point correction = 0.530002 (Hartree/Particle)

Temperature 298.150 Kelvin. Pressure 1.00000 Atm.

Sum of electronic and thermal Free Energies =

-1578.611781 hartrees (-990594.67869531 kcal/mol)

Coordinates (from last standard orientation):

| Center Number | Atomic Number | Coordinates (Angstroms) |           |           |
|---------------|---------------|-------------------------|-----------|-----------|
|               |               | X                       | Y         | Z         |
| 1             | 6             | -2.095272               | 0.087568  | -1.273617 |
| 2             | 6             | 0.330278                | 0.490182  | -1.175388 |
| 3             | 6             | -0.957876               | 0.219916  | -0.455347 |
| 4             | 6             | -0.306761               | -1.903441 | 0.709123  |
| 5             | 6             | 1.387571                | -0.715760 | -1.230413 |
| 6             | 6             | 0.986815                | -1.545647 | 1.097147  |
| 7             | 6             | 1.882385                | -1.102005 | 0.113179  |
| 8             | 6             | -1.336362               | -2.286894 | 1.737541  |
| 9             | 6             | 4.764979                | 1.179528  | -0.876019 |

|    |    |           |           |           |
|----|----|-----------|-----------|-----------|
| 10 | 6  | 4.761366  | -1.808271 | -1.799883 |
| 11 | 6  | 5.885414  | -1.034907 | 0.985233  |
| 12 | 6  | 1.379633  | -1.521243 | 2.557749  |
| 13 | 6  | 1.010787  | 1.759631  | -0.678435 |
| 14 | 6  | 1.871275  | 2.888798  | 1.253532  |
| 15 | 6  | 0.858203  | 3.950368  | 1.643434  |
| 16 | 1  | 0.104391  | 0.671007  | -2.227982 |
| 17 | 1  | -1.080517 | 0.560612  | 0.561923  |
| 18 | 1  | -0.496287 | -2.243115 | -0.300979 |
| 19 | 1  | 2.205308  | -0.415800 | -1.887306 |
| 20 | 1  | 0.858140  | -1.540460 | -1.715474 |
| 21 | 1  | -0.869214 | -2.970314 | 2.465434  |
| 22 | 1  | -1.649776 | -1.406286 | 2.310991  |
| 23 | 1  | 5.719309  | 1.346013  | -1.393590 |
| 24 | 1  | 3.963068  | 1.479829  | -1.559191 |
| 25 | 1  | 4.742201  | 1.849133  | -0.008170 |
| 26 | 1  | 4.121475  | -1.528916 | -2.644394 |
| 27 | 1  | 5.796258  | -1.828367 | -2.166533 |
| 28 | 1  | 4.502074  | -2.831003 | -1.499688 |
| 29 | 1  | 6.909263  | -0.893017 | 0.616217  |
| 30 | 1  | 5.756346  | -0.392005 | 1.864116  |
| 31 | 1  | 5.791000  | -2.077262 | 1.312429  |
| 32 | 1  | -2.289793 | -3.733313 | 0.843942  |
| 33 | 1  | 0.684891  | -0.901980 | 3.138277  |
| 34 | 1  | 1.360421  | -2.526569 | 2.997265  |
| 35 | 1  | 2.383414  | -1.115042 | 2.687924  |
| 36 | 1  | 2.610287  | 3.278988  | 0.551410  |
| 37 | 1  | 2.382932  | 2.483223  | 2.128945  |
| 38 | 1  | 0.114380  | 3.548640  | 2.340290  |
| 39 | 1  | 1.375103  | 4.780119  | 2.139689  |
| 40 | 1  | 0.344366  | 4.347849  | 0.762482  |
| 41 | 8  | -2.180461 | -0.094971 | -2.485261 |
| 42 | 8  | 3.133619  | -0.863984 | 0.466070  |
| 43 | 8  | -2.517279 | -2.857129 | 1.199672  |
| 44 | 8  | 1.220400  | 1.732806  | 0.652040  |
| 45 | 8  | 1.334209  | 2.682424  | -1.401619 |
| 46 | 14 | 4.646600  | -0.616900 | -0.353826 |
| 47 | 6  | -4.289770 | -0.909820 | -0.614179 |
| 48 | 6  | -3.821018 | 1.341459  | 0.065974  |
| 49 | 6  | -5.517959 | -0.849243 | 0.036131  |
| 50 | 6  | -5.054798 | 1.406444  | 0.705096  |
| 51 | 6  | -5.900480 | 0.302826  | 0.712969  |
| 52 | 1  | -6.169536 | -1.714257 | -0.008386 |
| 53 | 1  | -5.343029 | 2.336918  | 1.180997  |
| 54 | 1  | -6.859720 | 0.349381  | 1.218988  |
| 55 | 7  | -3.449363 | 0.168442  | -0.535878 |

|    |   |           |           |           |
|----|---|-----------|-----------|-----------|
| 56 | 6 | -2.938180 | 2.556935  | 0.001357  |
| 57 | 1 | -2.151154 | 2.531354  | 0.761645  |
| 58 | 1 | -2.459971 | 2.665968  | -0.975505 |
| 59 | 1 | -3.551698 | 3.441587  | 0.189471  |
| 60 | 6 | -3.919909 | -2.112131 | -1.431268 |
| 61 | 1 | -4.061142 | -1.896988 | -2.495392 |
| 62 | 1 | -2.884150 | -2.413939 | -1.283177 |
| 63 | 1 | -4.571345 | -2.943395 | -1.152675 |

*Product:*

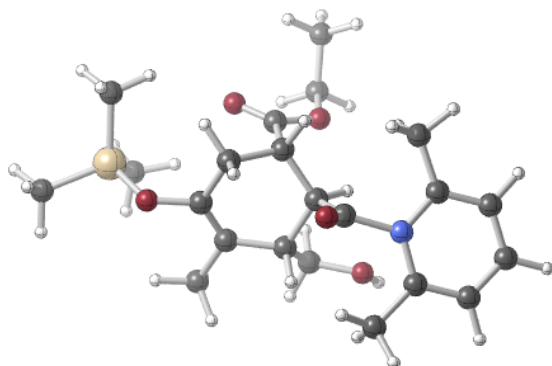

Charge = 1 Multiplicity = 1

HF = -1578.5370109 hartrees (-990547.759709859 kcal/mol)

Imaginary Frequencies: none found

Zero-point correction = 0.540052 (Hartree/Particle)

Temperature 298.150 Kelvin. Pressure 1.00000 Atm.

Sum of electronic and thermal Free Energies =

-1578.059553 hartrees (-990248.15010303 kcal/mol)

Coordinates (from last standard orientation):

| Center<br>Number | Atomic<br>Number | Coordinates (Angstroms) |           |           |
|------------------|------------------|-------------------------|-----------|-----------|
|                  |                  | X                       | Y         | Z         |
| 1                | 6                | -1.909183               | -0.620549 | -1.113813 |
| 2                | 6                | 0.212739                | 0.717072  | -0.976351 |
| 3                | 6                | -0.876490               | -0.038167 | -0.186595 |
| 4                | 6                | -0.317620               | -1.173144 | 0.742003  |
| 5                | 6                | 1.264739                | -0.210914 | -1.566204 |
| 6                | 6                | 1.159189                | -1.477895 | 0.586514  |
| 7                | 6                | 1.851542                | -1.080817 | -0.489466 |
| 8                | 6                | -0.713815               | -0.838536 | 2.179125  |

|    |    |           |           |           |
|----|----|-----------|-----------|-----------|
| 9  | 6  | 4.365587  | -0.018490 | 1.458382  |
| 10 | 6  | 4.819867  | 0.758479  | -1.505150 |
| 11 | 6  | 5.891144  | -1.914414 | -0.447238 |
| 12 | 6  | 1.757884  | -2.388572 | 1.625687  |
| 13 | 6  | 0.882504  | 1.763556  | -0.089022 |
| 14 | 6  | 0.506622  | 3.532098  | 1.444341  |
| 15 | 6  | 0.741703  | 4.780185  | 0.620304  |
| 16 | 1  | -0.269192 | 1.291412  | -1.778399 |
| 17 | 1  | -1.400350 | 0.665819  | 0.460518  |
| 18 | 1  | -0.839025 | -2.112406 | 0.509545  |
| 19 | 1  | 2.060842  | 0.383940  | -2.021570 |
| 20 | 1  | 0.820624  | -0.823318 | -2.358998 |
| 21 | 1  | -0.388614 | -1.632400 | 2.860382  |
| 22 | 1  | -0.237898 | 0.104352  | 2.489657  |
| 23 | 1  | 5.201433  | 0.648545  | 1.701151  |
| 24 | 1  | 3.438782  | 0.550919  | 1.587319  |
| 25 | 1  | 4.374500  | -0.842056 | 2.180742  |
| 26 | 1  | 5.805404  | 1.207602  | -1.331286 |
| 27 | 1  | 4.800059  | 0.398968  | -2.540373 |
| 28 | 1  | 4.066438  | 1.543689  | -1.392165 |
| 29 | 1  | 6.862130  | -1.475501 | -0.190322 |
| 30 | 1  | 5.718277  | -2.762278 | 0.224912  |
| 31 | 1  | 5.961366  | -2.303419 | -1.469127 |
| 32 | 1  | -2.418767 | -0.519476 | 3.087519  |
| 33 | 1  | 1.087407  | -3.231954 | 1.835195  |
| 34 | 1  | 2.713280  | -2.790874 | 1.282380  |
| 35 | 1  | 1.928807  | -1.869354 | 2.576812  |
| 36 | 1  | 1.422787  | 3.186475  | 1.928042  |
| 37 | 1  | -0.263706 | 3.686681  | 2.200895  |
| 38 | 1  | -0.180734 | 5.092610  | 0.122309  |
| 39 | 1  | 1.072699  | 5.592709  | 1.273864  |
| 40 | 1  | 1.513655  | 4.609485  | -0.134496 |
| 41 | 8  | -1.740494 | -1.189443 | -2.147303 |
| 42 | 8  | 3.130385  | -1.503276 | -0.718270 |
| 43 | 8  | -2.130568 | -0.726459 | 2.184501  |
| 44 | 8  | -0.010075 | 2.462433  | 0.620530  |
| 45 | 8  | 2.073152  | 1.972382  | -0.058532 |
| 46 | 14 | 4.529228  | -0.643617 | -0.298852 |
| 47 | 6  | -4.018635 | -1.508754 | -0.134408 |
| 48 | 6  | -3.884321 | 0.795144  | -0.787336 |
| 49 | 6  | -5.325863 | -1.307123 | 0.286043  |
| 50 | 6  | -5.187484 | 0.997091  | -0.370487 |
| 51 | 6  | -5.911291 | -0.054602 | 0.180172  |
| 52 | 1  | -5.868703 | -2.151532 | 0.694636  |
| 53 | 1  | -5.624147 | 1.980890  | -0.495670 |
| 54 | 1  | -6.933405 | 0.100097  | 0.510284  |

|    |   |           |           |           |
|----|---|-----------|-----------|-----------|
| 55 | 7 | -3.337505 | -0.446751 | -0.641737 |
| 56 | 6 | -3.073313 | 1.888091  | -1.414211 |
| 57 | 1 | -2.330483 | 2.288526  | -0.714046 |
| 58 | 1 | -2.556391 | 1.542564  | -2.315280 |
| 59 | 1 | -3.739735 | 2.704453  | -1.695301 |
| 60 | 6 | -3.365566 | -2.847288 | 0.013097  |
| 61 | 1 | -2.655236 | -3.069462 | -0.784315 |
| 62 | 1 | -2.848123 | -2.880507 | 0.977785  |
| 63 | 1 | -4.139482 | -3.617089 | 0.013761  |

*DAL with acylammonium ion formed with DTBP (endo):*

*Transition state (TS1):*

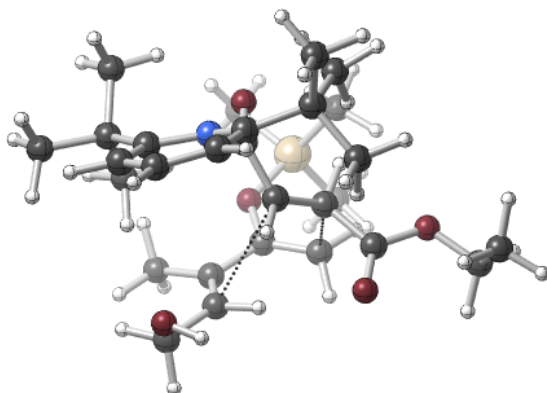

Charge = 1 Multiplicity = 1

HF = -1814.1921076 hartrees (-1138423.68944008 kcal/mol)

Imaginary Frequencies: 1 (-368.4471 1/cm)

Zero-point correction = 0.706519 (Hartree/Particle)

Temperature 298.150 Kelvin. Pressure 1.00000 Atm.

Sum of electronic and thermal Free Energies =

-1813.557470 hartrees (-1138025.4479997 kcal/mol)

Coordinates (from last standard orientation):

| Center<br>Number | Atomic<br>Number | Coordinates (Angstroms) |           |           |
|------------------|------------------|-------------------------|-----------|-----------|
|                  |                  | X                       | Y         | Z         |
| 1                | 6                | -0.857695               | -0.221258 | -0.789079 |
| 2                | 6                | -0.414939               | 0.531396  | 0.330382  |
| 3                | 6                | 0.720405                | 1.330737  | 0.180978  |

|    |    |           |           |           |
|----|----|-----------|-----------|-----------|
| 4  | 6  | 1.035671  | -0.972860 | 2.639015  |
| 5  | 6  | 2.586529  | 0.801098  | 0.981885  |
| 6  | 6  | 0.165827  | -1.718231 | 3.607788  |
| 7  | 6  | 2.642461  | -0.585243 | 0.878515  |
| 8  | 6  | 5.693064  | 0.123644  | -0.745912 |
| 9  | 6  | 3.124338  | 0.608095  | -2.451137 |
| 10 | 6  | 4.461973  | -2.169543 | -2.434904 |
| 11 | 6  | 1.994211  | -1.482126 | 1.836365  |
| 12 | 6  | 0.724898  | 2.578880  | 1.010684  |
| 13 | 6  | 1.423092  | 4.834332  | 1.086139  |
| 14 | 6  | 0.120114  | 5.586715  | 0.911803  |
| 15 | 6  | 2.390198  | -2.932628 | 1.765711  |
| 16 | 1  | -1.058098 | 0.640429  | 1.194861  |
| 17 | 1  | 0.833350  | 0.096485  | 2.612115  |
| 18 | 1  | 3.193321  | 1.402021  | 0.312166  |
| 19 | 1  | 2.465488  | 1.208665  | 1.978552  |
| 20 | 1  | 1.133488  | 1.428545  | -0.818462 |
| 21 | 1  | 0.227372  | -2.799372 | 3.470934  |
| 22 | 1  | 0.490867  | -1.496191 | 4.635245  |
| 23 | 1  | 5.490511  | 0.999770  | -0.121665 |
| 24 | 1  | 6.226049  | -0.613731 | -0.136049 |
| 25 | 1  | 6.365258  | 0.437458  | -1.553028 |
| 26 | 1  | 2.097496  | 0.244801  | -2.575007 |
| 27 | 1  | 3.092530  | 1.604024  | -1.996175 |
| 28 | 1  | 3.561744  | 0.718918  | -3.450721 |
| 29 | 1  | 4.958865  | -2.924855 | -1.817055 |
| 30 | 1  | 3.526534  | -2.597813 | -2.810740 |
| 31 | 1  | 5.106121  | -1.961753 | -3.296635 |
| 32 | 1  | 2.255946  | 5.362084  | 0.620065  |
| 33 | 1  | 1.651289  | 4.655681  | 2.139349  |
| 34 | 1  | 0.213345  | 6.581341  | 1.357897  |
| 35 | 1  | -0.113464 | 5.705828  | -0.150245 |
| 36 | 1  | -0.703403 | 5.063706  | 1.404738  |
| 37 | 1  | -1.306510 | -0.442568 | 3.681451  |
| 38 | 1  | 2.229067  | -3.330123 | 0.760061  |
| 39 | 1  | 3.457402  | -3.042989 | 1.987265  |
| 40 | 1  | 1.833823  | -3.543100 | 2.477356  |
| 41 | 8  | -0.267836 | -0.547508 | -1.792947 |
| 42 | 8  | 3.185994  | -1.207013 | -0.150245 |
| 43 | 8  | 0.192419  | 2.672014  | 2.096141  |
| 44 | 8  | 1.381717  | 3.562434  | 0.400231  |
| 45 | 8  | -1.200211 | -1.372989 | 3.424147  |
| 46 | 14 | 4.138004  | -0.613909 | -1.468329 |
| 47 | 6  | -2.724479 | -1.814235 | -0.225267 |
| 48 | 6  | -3.214945 | 0.514598  | -0.639852 |
| 49 | 6  | -3.957799 | -1.947866 | 0.396878  |

|    |   |           |           |           |
|----|---|-----------|-----------|-----------|
| 50 | 6 | -4.434140 | 0.363671  | 0.014947  |
| 51 | 6 | -4.786832 | -0.849558 | 0.572469  |
| 52 | 1 | -4.273252 | -2.911272 | 0.767279  |
| 53 | 1 | -5.107341 | 1.207497  | 0.088374  |
| 54 | 1 | -5.724366 | -0.954720 | 1.108917  |
| 55 | 6 | -1.851734 | -3.050966 | -0.505877 |
| 56 | 6 | -1.723649 | -3.229471 | -2.031679 |
| 57 | 1 | -1.136174 | -4.132665 | -2.228680 |
| 58 | 1 | -2.712031 | -3.364067 | -2.484621 |
| 59 | 1 | -1.229799 | -2.383245 | -2.508342 |
| 60 | 6 | -0.473711 | -3.001563 | 0.177170  |
| 61 | 1 | -0.029116 | -3.999334 | 0.103495  |
| 62 | 1 | 0.226396  | -2.302638 | -0.281702 |
| 63 | 1 | -0.583414 | -2.750287 | 1.236910  |
| 64 | 6 | -2.546672 | -4.313771 | 0.031392  |
| 65 | 1 | -2.651277 | -4.295976 | 1.121336  |
| 66 | 1 | -3.530893 | -4.470486 | -0.420067 |
| 67 | 1 | -1.925629 | -5.174746 | -0.230115 |
| 68 | 6 | -2.957027 | 1.861971  | -1.354922 |
| 69 | 6 | -4.224853 | 2.158083  | -2.195134 |
| 70 | 1 | -4.394447 | 1.372326  | -2.938549 |
| 71 | 1 | -5.128834 | 2.268013  | -1.593266 |
| 72 | 1 | -4.072345 | 3.102419  | -2.725710 |
| 73 | 6 | -1.790028 | 1.915420  | -2.354580 |
| 74 | 1 | -1.789657 | 1.059140  | -3.033976 |
| 75 | 1 | -1.921616 | 2.820731  | -2.954299 |
| 76 | 1 | -0.813440 | 1.996071  | -1.876705 |
| 77 | 6 | -2.785958 | 2.972982  | -0.304512 |
| 78 | 1 | -2.675382 | 3.933937  | -0.818006 |
| 79 | 1 | -3.655559 | 3.039173  | 0.357253  |
| 80 | 1 | -1.897700 | 2.804841  | 0.311962  |
| 81 | 7 | -2.357308 | -0.553797 | -0.643624 |

Intermediate (INT):

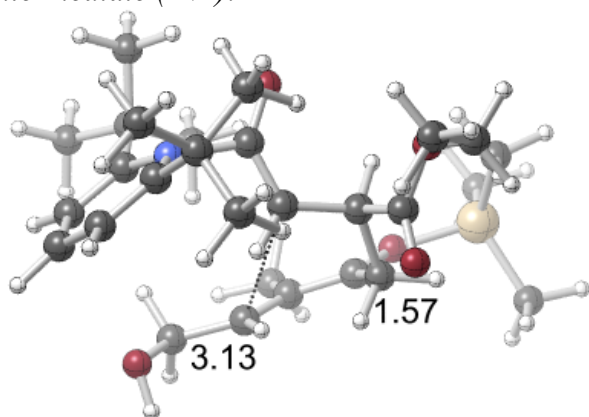

Charge = 1 Multiplicity = 1

HF = -1814.2122996 hartrees (-1138436.360122 kcal/mol)

Imaginary Frequencies: none found

Zero-point correction = 0.707579 (Hartree/Particle)

Temperature 298.150 Kelvin. Pressure 1.00000 Atm.

Sum of electronic and thermal Free Energies =

-1813.578165 hartrees (-1138038.43431915 kcal/mol)

Coordinates (from last standard orientation):

| Center Number | Atomic Number | Coordinates (Angstroms) |           |           |
|---------------|---------------|-------------------------|-----------|-----------|
|               |               | X                       | Y         | Z         |
| 1             | 6             | -1.023092               | 0.303636  | -0.912540 |
| 2             | 6             | -0.333042               | 0.493262  | 0.258629  |
| 3             | 6             | 1.064403                | 1.028194  | 0.202564  |
| 4             | 6             | 0.545524                | -2.038835 | 1.877039  |
| 5             | 6             | 2.056172                | 0.380542  | 1.230807  |
| 6             | 6             | -0.427483               | -3.132572 | 2.193829  |
| 7             | 6             | 2.439420                | -0.999038 | 0.836046  |
| 8             | 6             | 5.794068                | 0.230656  | 1.091461  |
| 9             | 6             | 4.156732                | 1.299261  | -1.346663 |
| 10            | 6             | 5.695247                | -1.376236 | -1.571481 |
| 11            | 6             | 1.674135                | -2.178619 | 1.135086  |
| 12            | 6             | 1.050083                | 2.511819  | 0.545555  |
| 13            | 6             | 1.089103                | 4.703668  | -0.339516 |
| 14            | 6             | -0.278666               | 5.264760  | -0.015038 |
| 15            | 6             | 2.152087                | -3.487044 | 0.564477  |
| 16            | 1             | -0.818191               | 0.372720  | 1.219086  |
| 17            | 1             | 0.290596                | -1.077626 | 2.310130  |



|    |    |           |           |           |
|----|----|-----------|-----------|-----------|
| 18 | 1  | 2.958898  | 0.995073  | 1.282558  |
| 19 | 1  | 1.594513  | 0.408348  | 2.218543  |
| 20 | 1  | 1.444123  | 0.920332  | -0.817818 |
| 21 | 1  | -0.838057 | -3.532647 | 1.255753  |
| 22 | 1  | 0.096509  | -3.965993 | 2.685121  |
| 23 | 1  | 5.242284  | 0.888524  | 1.770897  |
| 24 | 1  | 6.072114  | -0.676910 | 1.637252  |
| 25 | 1  | 6.719444  | 0.747160  | 0.810247  |
| 26 | 1  | 3.433734  | 1.011273  | -2.117114 |
| 27 | 1  | 3.693454  | 2.040723  | -0.687870 |
| 28 | 1  | 4.994204  | 1.793308  | -1.855456 |
| 29 | 1  | 5.987967  | -2.284219 | -1.034055 |
| 30 | 1  | 5.052504  | -1.664234 | -2.409942 |
| 31 | 1  | 6.602708  | -0.922677 | -1.985327 |
| 32 | 1  | 1.470996  | 5.101619  | -1.280864 |
| 33 | 1  | 1.806424  | 4.916041  | 0.456955  |
| 34 | 1  | -0.202482 | 6.349907  | 0.107261  |
| 35 | 1  | -0.985232 | 5.058763  | -0.823366 |
| 36 | 1  | -0.661795 | 4.839402  | 0.916121  |
| 37 | 1  | -1.224966 | -2.572043 | 3.873633  |
| 38 | 1  | 2.299797  | -3.410872 | -0.517209 |
| 39 | 1  | 3.113315  | -3.768277 | 1.007565  |
| 40 | 1  | 1.438016  | -4.289526 | 0.759622  |
| 41 | 8  | -0.738068 | 0.457917  | -2.094875 |
| 42 | 8  | 3.481194  | -1.189712 | 0.111998  |
| 43 | 8  | 1.033223  | 2.944006  | 1.677743  |
| 44 | 8  | 1.052119  | 3.275011  | -0.550103 |
| 45 | 8  | -1.519631 | -2.671421 | 2.953985  |
| 46 | 14 | 4.831235  | -0.182241 | -0.446906 |
| 47 | 6  | -2.599122 | -1.659789 | -0.587061 |
| 48 | 6  | -3.251099 | 0.496553  | 0.230732  |
| 49 | 6  | -3.429243 | -2.260815 | 0.344684  |
| 50 | 6  | -4.080133 | -0.112815 | 1.175908  |
| 51 | 6  | -4.115641 | -1.488192 | 1.278372  |
| 52 | 1  | -3.541318 | -3.335556 | 0.360596  |
| 53 | 1  | -4.681600 | 0.502184  | 1.833373  |
| 54 | 1  | -4.713721 | -1.968171 | 2.046414  |
| 55 | 6  | -1.966211 | -2.473627 | -1.730972 |
| 56 | 6  | -2.445974 | -1.865198 | -3.063746 |
| 57 | 1  | -2.066918 | -2.478040 | -3.889097 |
| 58 | 1  | -3.540768 | -1.869036 | -3.115567 |
| 59 | 1  | -2.082275 | -0.844688 | -3.187372 |
| 60 | 6  | -0.430753 | -2.562001 | -1.682767 |
| 61 | 1  | -0.106532 | -3.247971 | -2.473417 |
| 62 | 1  | 0.062724  | -1.605735 | -1.848507 |
| 63 | 1  | -0.107045 | -2.982355 | -0.727334 |

|    |   |           |           |           |
|----|---|-----------|-----------|-----------|
| 64 | 6 | -2.479663 | -3.921965 | -1.686614 |
| 65 | 1 | -2.137307 | -4.459579 | -0.795052 |
| 66 | 1 | -3.571901 | -3.975320 | -1.733011 |
| 67 | 1 | -2.083523 | -4.448722 | -2.559813 |
| 68 | 6 | -3.342350 | 2.023690  | 0.056992  |
| 69 | 6 | -4.844623 | 2.340191  | -0.136959 |
| 70 | 1 | -5.243280 | 1.825810  | -1.017854 |
| 71 | 1 | -5.452993 | 2.067534  | 0.728478  |
| 72 | 1 | -4.956650 | 3.417858  | -0.291576 |
| 73 | 6 | -2.620571 | 2.596835  | -1.170012 |
| 74 | 1 | -2.837699 | 2.021715  | -2.074832 |
| 75 | 1 | -2.985606 | 3.618136  | -1.319883 |
| 76 | 1 | -1.537790 | 2.647036  | -1.043463 |
| 77 | 6 | -2.844773 | 2.737812  | 1.322824  |
| 78 | 1 | -3.026496 | 3.813391  | 1.219528  |
| 79 | 1 | -3.371807 | 2.393862  | 2.219257  |
| 80 | 1 | -1.771072 | 2.580807  | 1.467632  |
| 81 | 7 | -2.451787 | -0.293024 | -0.531909 |

*Transition state 2 (TS2):*

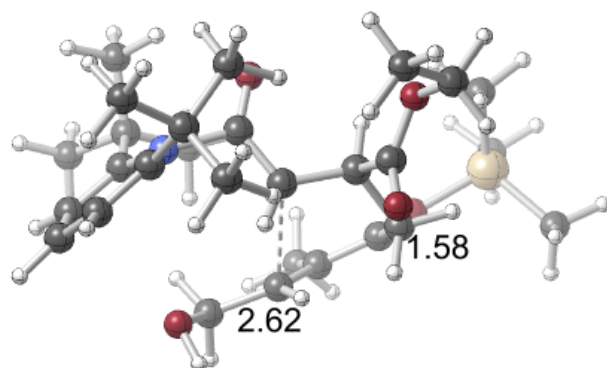

Charge = 1 Multiplicity = 1

HF = -1814.20984 hartrees (-1138434.8166984 kcal/mol)

Imaginary Frequencies: 1 (-113.5750 1/cm)

Zero-point correction = 0.707072 (Hartree/Particle)

Temperature 298.150 Kelvin. Pressure 1.00000 Atm.

Sum of electronic and thermal Free Energies =

-1813.573163 hartrees (-1138035.29551413 kcal/mol)

Coordinates (from last standard orientation):

| Center<br>Number | Atomic<br>Number | Coordinates (Angstroms) |           |           |
|------------------|------------------|-------------------------|-----------|-----------|
|                  |                  | X                       | Y         | Z         |
| 1                | 6                | 0.977150                | 0.093936  | 0.775674  |
| 2                | 6                | 0.285954                | 0.430150  | -0.386404 |
| 3                | 6                | -1.092320               | 0.981398  | -0.209111 |
| 4                | 6                | -0.429960               | -1.575084 | -1.921669 |
| 5                | 6                | -2.224714               | 0.438548  | -1.175549 |
| 6                | 6                | 0.758811                | -2.410690 | -2.278790 |
| 7                | 6                | -2.502817               | -0.997594 | -0.945974 |
| 8                | 6                | -5.883457               | 0.236429  | -0.956091 |
| 9                | 6                | -4.216126               | 0.719675  | 1.649505  |
| 10               | 6                | -5.815862               | -1.903173 | 1.270414  |
| 11               | 6                | -1.573944               | -2.002736 | -1.288464 |
| 12               | 6                | -1.086978               | 2.478860  | -0.473850 |
| 13               | 6                | -1.444676               | 4.618377  | 0.469120  |
| 14               | 6                | -0.072424               | 5.256425  | 0.497644  |
| 15               | 6                | -1.841851               | -3.420772 | -0.861626 |
| 16               | 1                | 0.835742                | 0.614856  | -1.300689 |
| 17               | 1                | -0.438557               | -0.617064 | -2.423976 |
| 18               | 1                | -3.126065               | 1.031093  | -1.002186 |
| 19               | 1                | -1.905391               | 0.631945  | -2.202087 |
| 20               | 1                | -1.405848               | 0.813288  | 0.824363  |
| 21               | 1                | 1.133624                | -2.962964 | -1.411215 |
| 22               | 1                | 0.440684                | -3.164418 | -3.018282 |
| 23               | 1                | -6.839257               | 0.604412  | -0.564668 |
| 24               | 1                | -5.378910               | 1.078159  | -1.439642 |
| 25               | 1                | -6.107444               | -0.514202 | -1.722066 |
| 26               | 1                | -3.510553               | 0.245771  | 2.341016  |
| 27               | 1                | -3.714820               | 1.567820  | 1.171677  |
| 28               | 1                | -5.042063               | 1.121179  | 2.249416  |
| 29               | 1                | -6.133773               | -2.659769 | 0.545440  |
| 30               | 1                | -5.191657               | -2.391908 | 2.025805  |
| 31               | 1                | -6.711849               | -1.519745 | 1.771102  |
| 32               | 1                | -2.055576               | 4.945447  | 1.311769  |
| 33               | 1                | -1.970250               | 4.835565  | -0.463594 |
| 34               | 1                | -0.175511               | 6.341206  | 0.394735  |
| 35               | 1                | 0.433144                | 5.046831  | 1.444345  |
| 36               | 1                | 0.543426                | 4.888868  | -0.328025 |
| 37               | 1                | 1.597317                | -1.310698 | -3.647294 |
| 38               | 1                | -1.967955               | -3.496348 | 0.223102  |
| 39               | 1                | -2.769038               | -3.777505 | -1.322651 |
| 40               | 1                | -1.034219               | -4.089173 | -1.168190 |
| 41               | 8                | 0.612811                | 0.059179  | 1.942163  |

|    |    |           |           |           |
|----|----|-----------|-----------|-----------|
| 42 | 8  | -3.557893 | -1.378372 | -0.282926 |
| 43 | 8  | -0.881369 | 2.966916  | -1.563818 |
| 44 | 8  | -1.363751 | 3.183783  | 0.625399  |
| 45 | 8  | 1.827850  | -1.626487 | -2.758336 |
| 46 | 14 | -4.900398 | -0.519225 | 0.434882  |
| 47 | 6  | 2.763542  | -1.669716 | 0.466954  |
| 48 | 6  | 3.211521  | 0.597681  | -0.195414 |
| 49 | 6  | 3.776189  | -2.101134 | -0.375234 |
| 50 | 6  | 4.201907  | 0.147077  | -1.066654 |
| 51 | 6  | 4.441572  | -1.204431 | -1.203760 |
| 52 | 1  | 4.044938  | -3.147042 | -0.404254 |
| 53 | 1  | 4.785230  | 0.867529  | -1.626345 |
| 54 | 1  | 5.185725  | -1.563541 | -1.907330 |
| 55 | 6  | 2.157365  | -2.622956 | 1.518053  |
| 56 | 6  | 2.505869  | -2.053436 | 2.909878  |
| 57 | 1  | 2.171699  | -2.764231 | 3.673678  |
| 58 | 1  | 3.590726  | -1.934889 | 3.011204  |
| 59 | 1  | 2.022883  | -1.093230 | 3.086465  |
| 60 | 6  | 0.648812  | -2.895171 | 1.379431  |
| 61 | 1  | 0.450897  | -3.464959 | 0.468450  |
| 62 | 1  | 0.343817  | -3.521056 | 2.225570  |
| 63 | 1  | 0.024884  | -2.004079 | 1.390579  |
| 64 | 6  | 2.837816  | -3.999889 | 1.431448  |
| 65 | 1  | 2.665858  | -4.493186 | 0.468939  |
| 66 | 1  | 3.915736  | -3.939988 | 1.611054  |
| 67 | 1  | 2.407259  | -4.637290 | 2.209268  |
| 68 | 6  | 3.139987  | 2.110572  | 0.100677  |
| 69 | 6  | 4.586224  | 2.524839  | 0.472573  |
| 70 | 1  | 4.944837  | 1.959144  | 1.338989  |
| 71 | 1  | 5.293806  | 2.388965  | -0.348207 |
| 72 | 1  | 4.585676  | 3.587160  | 0.734916  |
| 73 | 6  | 2.270434  | 2.521341  | 1.297409  |
| 74 | 1  | 2.472631  | 1.904150  | 2.178059  |
| 75 | 1  | 2.522524  | 3.557348  | 1.544840  |
| 76 | 1  | 1.199710  | 2.488405  | 1.089836  |
| 77 | 6  | 2.707902  | 2.896236  | -1.146760 |
| 78 | 1  | 2.839344  | 3.966541  | -0.954053 |
| 79 | 1  | 3.314800  | 2.637066  | -2.020676 |
| 80 | 1  | 1.655037  | 2.719682  | -1.386848 |
| 81 | 7  | 2.435088  | -0.330674 | 0.431268  |

*Product:*

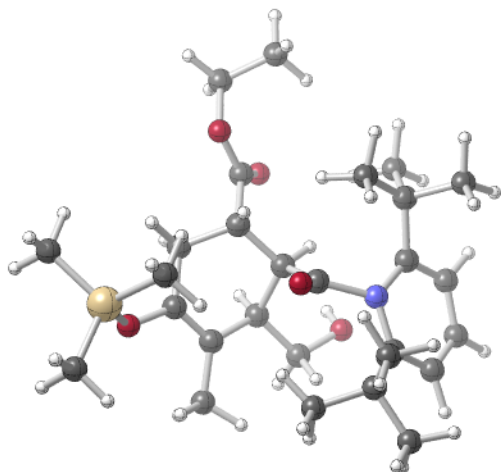

Charge = 1 Multiplicity = 1

HF = -1814.2627014 hartrees (-1138467.98775551 kcal/mol)

Imaginary Frequencies: none found

Zero-point correction = 0.712085 (Hartree/Particle)

Temperature 298.150 Kelvin. Pressure 1.00000 Atm.

Sum of electronic and thermal Free Energies =

-1813.619684 hartrees (-1138064.48790684 kcal/mol)

Coordinates (from last standard orientation):

| Center<br>Number | Atomic<br>Number | Coordinates (Angstroms) |           |           |
|------------------|------------------|-------------------------|-----------|-----------|
|                  |                  | X                       | Y         | Z         |
| 1                | 6                | 0.700098                | -0.303778 | 0.482857  |
| 2                | 6                | 0.188192                | 0.511558  | -0.694579 |
| 3                | 6                | -0.967020               | 1.422057  | -0.210355 |
| 4                | 6                | -0.280780               | -0.354445 | -1.914133 |
| 5                | 6                | -2.355271               | 1.083737  | -0.810589 |
| 6                | 6                | 0.824775                | -1.238901 | -2.485369 |
| 7                | 6                | -2.544102               | -0.389982 | -1.045042 |
| 8                | 6                | -5.880060               | 0.541596  | 0.569448  |
| 9                | 6                | -3.408917               | -0.612929 | 2.044360  |
| 10               | 6                | -5.504606               | -2.495956 | 0.770741  |
| 11               | 6                | -1.565561               | -1.105389 | -1.615991 |
| 12               | 6                | -0.680957               | 2.867758  | -0.565737 |
| 13               | 6                | -1.133792               | 5.111827  | 0.021291  |
| 14               | 6                | 0.172787                | 5.568032  | 0.636705  |
| 15               | 6                | -1.801193               | -2.519191 | -2.080663 |

|    |    |           |           |           |
|----|----|-----------|-----------|-----------|
| 16 | 1  | 1.013880  | 1.122542  | -1.068114 |
| 17 | 1  | -0.482865 | 0.416724  | -2.676836 |
| 18 | 1  | -3.128879 | 1.487599  | -0.152356 |
| 19 | 1  | -2.464730 | 1.595385  | -1.778173 |
| 20 | 1  | -1.067218 | 1.346877  | 0.874604  |
| 21 | 1  | 1.047221  | -2.074192 | -1.815027 |
| 22 | 1  | 0.483388  | -1.668156 | -3.436550 |
| 23 | 1  | -6.486307 | 0.558766  | 1.483079  |
| 24 | 1  | -5.408751 | 1.525123  | 0.466966  |
| 25 | 1  | -6.562433 | 0.406292  | -0.277207 |
| 26 | 1  | -2.626829 | -1.379880 | 2.018993  |
| 27 | 1  | -2.919671 | 0.367171  | 2.009325  |
| 28 | 1  | -3.922946 | -0.691715 | 3.009708  |
| 29 | 1  | -6.155999 | -2.664997 | -0.093672 |
| 30 | 1  | -4.785035 | -3.320800 | 0.817381  |
| 31 | 1  | -6.126600 | -2.541384 | 1.672026  |
| 32 | 1  | -1.992145 | 5.586028  | 0.498853  |
| 33 | 1  | -1.165767 | 5.302607  | -1.053483 |
| 34 | 1  | 0.289809  | 6.646967  | 0.498282  |
| 35 | 1  | 0.186757  | 5.352872  | 1.709168  |
| 36 | 1  | 1.019323  | 5.065950  | 0.159066  |
| 37 | 1  | 1.895839  | 0.169125  | -3.297747 |
| 38 | 1  | -2.534441 | -3.013178 | -1.437347 |
| 39 | 1  | -2.204469 | -2.530028 | -3.101917 |
| 40 | 1  | -0.893207 | -3.124016 | -2.088144 |
| 41 | 8  | 0.039613  | -0.659431 | 1.406321  |
| 42 | 8  | -3.776962 | -0.920625 | -0.818115 |
| 43 | 8  | -0.000467 | 3.221978  | -1.504163 |
| 44 | 8  | -1.326650 | 3.698348  | 0.250946  |
| 45 | 8  | 2.042731  | -0.538819 | -2.647632 |
| 46 | 14 | -4.632168 | -0.850506 | 0.646579  |
| 47 | 6  | 2.495729  | -2.035118 | 0.218600  |
| 48 | 6  | 3.093882  | 0.305389  | 0.187116  |
| 49 | 6  | 3.648438  | -2.312232 | -0.496651 |
| 50 | 6  | 4.250028  | -0.001781 | -0.516476 |
| 51 | 6  | 4.483832  | -1.294416 | -0.940772 |
| 52 | 1  | 3.914361  | -3.338645 | -0.700424 |
| 53 | 1  | 4.972847  | 0.778055  | -0.718386 |
| 54 | 1  | 5.356593  | -1.530032 | -1.541006 |
| 55 | 6  | 1.733263  | -3.173959 | 0.930621  |
| 56 | 6  | 1.737723  | -2.863391 | 2.443805  |
| 57 | 1  | 1.306966  | -3.719621 | 2.972893  |
| 58 | 1  | 2.766852  | -2.733106 | 2.796951  |
| 59 | 1  | 1.164913  | -1.975163 | 2.701589  |
| 60 | 6  | 0.325828  | -3.473553 | 0.385408  |
| 61 | 1  | 0.406686  | -3.945988 | -0.597959 |

|    |   |           |           |           |
|----|---|-----------|-----------|-----------|
| 62 | 1 | -0.151823 | -4.192892 | 1.058859  |
| 63 | 1 | -0.338431 | -2.614598 | 0.300456  |
| 64 | 6 | 2.514223  | -4.493008 | 0.777247  |
| 65 | 1 | 2.566347  | -4.830102 | -0.262368 |
| 66 | 1 | 3.527372  | -4.423323 | 1.184948  |
| 67 | 1 | 1.978760  | -5.261125 | 1.342799  |
| 68 | 6 | 3.018059  | 1.687376  | 0.866577  |
| 69 | 6 | 4.265992  | 1.729071  | 1.786580  |
| 70 | 1 | 4.243855  | 0.911764  | 2.515046  |
| 71 | 1 | 5.201617  | 1.673050  | 1.225907  |
| 72 | 1 | 4.257302  | 2.677347  | 2.332740  |
| 73 | 6 | 1.818975  | 1.929066  | 1.788582  |
| 74 | 1 | 1.684532  | 1.124156  | 2.517823  |
| 75 | 1 | 2.015987  | 2.848435  | 2.348020  |
| 76 | 1 | 0.881769  | 2.095977  | 1.256884  |
| 77 | 6 | 3.119611  | 2.825077  | -0.160103 |
| 78 | 1 | 3.195764  | 3.773875  | 0.381383  |
| 79 | 1 | 4.009108  | 2.732372  | -0.789973 |
| 80 | 1 | 2.238372  | 2.873692  | -0.806385 |
| 81 | 7 | 2.171645  | -0.693915 | 0.392497  |

*DAL with acylammonium ion formed with DTBP (exo):*

*Transition state (TS1):*

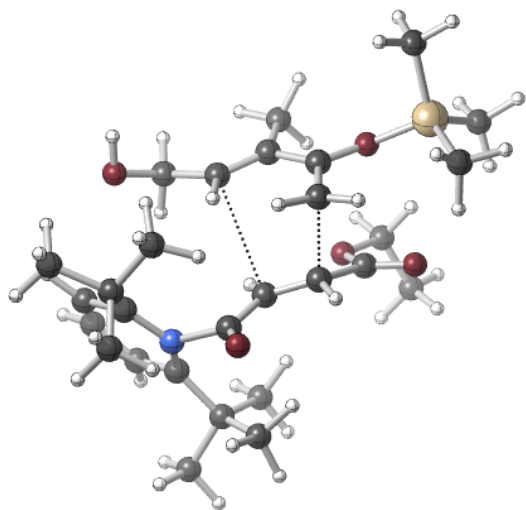

Charge = 1 Multiplicity = 1

HF = -1814.1978087 hartrees (-1138427.26693734 kcal/mol)

Imaginary Frequencies: 1 (-301.8672 1/cm)

Zero-point correction = 0.705979 (Hartree/Particle)

Temperature 298.150 Kelvin. Pressure 1.00000 Atm.

Sum of electronic and thermal Free Energies =

-1813.562416 hartrees (-1138028.55166416 kcal/mol)

Coordinates (from last standard orientation):

| Center<br>Number | Atomic<br>Number | Coordinates (Angstroms) |           |           |
|------------------|------------------|-------------------------|-----------|-----------|
|                  |                  | X                       | Y         | Z         |
| 1                | 6                | -1.662203               | 0.264167  | -1.265148 |
| 2                | 6                | 0.713384                | 0.701079  | -1.144624 |
| 3                | 6                | -0.505990               | 0.576334  | -0.492424 |
| 4                | 6                | 0.237808                | -1.807820 | 1.211232  |
| 5                | 6                | 1.757791                | -1.146763 | -1.181398 |
| 6                | 6                | 1.539611                | -1.460510 | 1.311812  |
| 7                | 6                | 2.295796                | -1.149235 | 0.096215  |
| 8                | 6                | -0.730067               | -2.051982 | 2.332577  |
| 9                | 6                | 4.813549                | -0.402863 | -2.376269 |
| 10               | 6                | 5.637803                | -2.444477 | -0.226708 |
| 11               | 6                | 6.015456                | 0.607143  | 0.259016  |
| 12               | 6                | 2.271265                | -1.268731 | 2.613128  |
| 13               | 6                | 1.828419                | 1.493279  | -0.538261 |
| 14               | 6                | 2.704826                | 2.386518  | 1.466904  |
| 15               | 6                | 2.617112                | 3.879789  | 1.226683  |
| 16               | 1                | 0.716465                | 0.715179  | -2.231716 |
| 17               | 1                | -0.598523               | 0.753580  | 0.570966  |
| 18               | 1                | -0.207093               | -1.936307 | 0.230460  |
| 19               | 1                | 2.412306                | -0.948162 | -2.021895 |
| 20               | 1                | 0.872368                | -1.729179 | -1.403164 |
| 21               | 1                | -0.222729               | -2.325940 | 3.264726  |
| 22               | 1                | -1.295698               | -1.131867 | 2.531633  |
| 23               | 1                | 5.816207                | -0.205917 | -2.777033 |
| 24               | 1                | 4.407221                | -1.258513 | -2.925174 |
| 25               | 1                | 4.195396                | 0.478576  | -2.573111 |
| 26               | 1                | 5.791898                | -2.625765 | 0.842420  |
| 27               | 1                | 4.937608                | -3.199520 | -0.602679 |
| 28               | 1                | 6.596019                | -2.597177 | -0.736463 |
| 29               | 1                | 7.059328                | 0.524800  | -0.065775 |
| 30               | 1                | 5.657433                | 1.601932  | -0.027829 |
| 31               | 1                | 5.997058                | 0.531359  | 1.351405  |
| 32               | 1                | -1.247793               | -3.884659 | 1.923133  |
| 33               | 1                | 2.537538                | -0.215116 | 2.749093  |
| 34               | 1                | 1.670772                | -1.580568 | 3.468387  |
| 35               | 1                | 3.206804                | -1.836417 | 2.618443  |



|    |    |           |           |           |
|----|----|-----------|-----------|-----------|
| 36 | 1  | 3.665804  | 1.973794  | 1.150893  |
| 37 | 1  | 2.538361  | 2.144707  | 2.518061  |
| 38 | 1  | 1.640062  | 4.263232  | 1.535108  |
| 39 | 1  | 3.386514  | 4.386294  | 1.817242  |
| 40 | 1  | 2.779161  | 4.117740  | 0.172849  |
| 41 | 8  | -1.764821 | 0.059944  | -2.449834 |
| 42 | 8  | 3.505420  | -0.643853 | 0.327218  |
| 43 | 8  | -1.700013 | -3.026580 | 1.978740  |
| 44 | 8  | 1.656518  | 1.677302  | 0.771399  |
| 45 | 8  | 2.783910  | 1.890742  | -1.168164 |
| 46 | 14 | 4.989331  | -0.722751 | -0.544534 |
| 47 | 6  | -3.383404 | -1.029867 | 0.008898  |
| 48 | 6  | -3.184348 | 1.357668  | 0.334504  |
| 49 | 6  | -3.997415 | -1.130438 | 1.248977  |
| 50 | 6  | -3.797840 | 1.234608  | 1.577762  |
| 51 | 6  | -4.146327 | -0.012873 | 2.061182  |
| 52 | 1  | -4.347206 | -2.091196 | 1.595050  |
| 53 | 1  | -3.992748 | 2.122447  | 2.165797  |
| 54 | 1  | -4.582219 | -0.114899 | 3.049902  |
| 55 | 7  | -2.897486 | 0.211321  | -0.352856 |
| 56 | 6  | -2.941069 | 2.776090  | -0.222309 |
| 57 | 6  | -3.409723 | -2.208493 | -0.985190 |
| 58 | 6  | -1.905312 | 3.514992  | 0.640650  |
| 59 | 1  | -1.844836 | 4.555808  | 0.305663  |
| 60 | 1  | -2.185561 | 3.515795  | 1.698781  |
| 61 | 1  | -0.911595 | 3.066588  | 0.541985  |
| 62 | 6  | -2.536177 | 2.873944  | -1.701695 |
| 63 | 1  | -3.167439 | 2.251477  | -2.342271 |
| 64 | 1  | -2.672989 | 3.915402  | -2.007559 |
| 65 | 1  | -1.488983 | 2.624951  | -1.880575 |
| 66 | 6  | -4.301943 | 3.506954  | -0.111417 |
| 67 | 1  | -5.071061 | 2.992992  | -0.697698 |
| 68 | 1  | -4.656158 | 3.600622  | 0.917341  |
| 69 | 1  | -4.185239 | 4.517842  | -0.513087 |
| 70 | 6  | -4.198631 | -1.733723 | -2.225018 |
| 71 | 1  | -4.326014 | -2.582738 | -2.904733 |
| 72 | 1  | -5.194706 | -1.385278 | -1.929704 |
| 73 | 1  | -3.688218 | -0.932076 | -2.758710 |
| 74 | 6  | -2.042094 | -2.799235 | -1.376590 |
| 75 | 1  | -2.217283 | -3.565590 | -2.139143 |
| 76 | 1  | -1.338130 | -2.083626 | -1.799865 |
| 77 | 1  | -1.589409 | -3.285528 | -0.509245 |
| 78 | 6  | -4.202845 | -3.377423 | -0.377859 |
| 79 | 1  | -3.716642 | -3.774603 | 0.517967  |
| 80 | 1  | -5.232833 | -3.096917 | -0.136114 |
| 81 | 1  | -4.244157 | -4.177529 | -1.122949 |

Intermediate (INT):

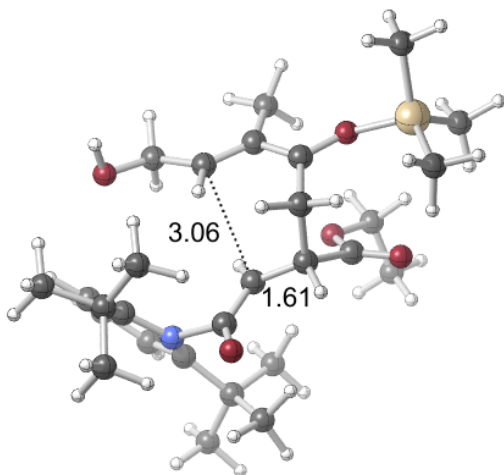

Charge = 1 Multiplicity = 1

HF = -1814.2119509 hartrees (-1138436.14130926 kcal/mol)

Imaginary Frequencies: none found

Zero-point correction = 0.707358 (Hartree/Particle)

Temperature 298.150 Kelvin. Pressure 1.00000 Atm.

Sum of electronic and thermal Free Energies =

-1813.576788 hartrees (-1138037.57023788 kcal/mol)

Coordinates (from last standard orientation):

| Center<br>Number | Atomic<br>Number | Coordinates (Angstroms) |           |           |
|------------------|------------------|-------------------------|-----------|-----------|
|                  |                  | X                       | Y         | Z         |
| 1                | 6                | -1.602800               | 0.264095  | -1.308079 |
| 2                | 6                | 0.848587                | 0.383892  | -1.145279 |
| 3                | 6                | -0.489577               | 0.341040  | -0.504675 |
| 4                | 6                | 0.299079                | -2.072995 | 1.199042  |
| 5                | 6                | 1.640057                | -1.015889 | -1.167039 |
| 6                | 6                | 1.570062                | -1.618689 | 1.338597  |
| 7                | 6                | 2.279599                | -1.223326 | 0.149246  |
| 8                | 6                | -0.636525               | -2.435231 | 2.311573  |
| 9                | 6                | 4.728327                | -0.376354 | -2.414104 |
| 10               | 6                | 5.875880                | -2.234959 | -0.219508 |
| 11               | 6                | 5.773953                | 0.847253  | 0.209652  |
| 12               | 6                | 2.276315                | -1.428155 | 2.653304  |
| 13               | 6                | 1.803168                | 1.400501  | -0.539743 |
| 14               | 6                | 2.525844                | 2.408925  | 1.482633  |

|    |    |           |           |           |
|----|----|-----------|-----------|-----------|
| 15 | 6  | 2.120609  | 3.859901  | 1.324368  |
| 16 | 1  | 0.741737  | 0.633432  | -2.204548 |
| 17 | 1  | -0.585635 | 0.437486  | 0.567604  |
| 18 | 1  | -0.127787 | -2.193706 | 0.210143  |
| 19 | 1  | 2.398181  | -0.971379 | -1.947126 |
| 20 | 1  | 0.915680  | -1.788767 | -1.421249 |
| 21 | 1  | -0.107016 | -2.943753 | 3.126742  |
| 22 | 1  | -1.050801 | -1.507109 | 2.729311  |
| 23 | 1  | 5.707733  | -0.121276 | -2.840601 |
| 24 | 1  | 4.369930  | -1.270342 | -2.933481 |
| 25 | 1  | 4.053028  | 0.461414  | -2.614693 |
| 26 | 1  | 6.025419  | -2.368021 | 0.856960  |
| 27 | 1  | 5.311343  | -3.094578 | -0.596982 |
| 28 | 1  | 6.859830  | -2.244094 | -0.702163 |
| 29 | 1  | 6.839668  | 0.873978  | -0.047572 |
| 30 | 1  | 5.319269  | 1.773566  | -0.154368 |
| 31 | 1  | 5.695889  | 0.812554  | 1.301025  |
| 32 | 1  | -1.424964 | -4.106765 | 1.702928  |
| 33 | 1  | 2.568106  | -0.378959 | 2.771822  |
| 34 | 1  | 1.639815  | -1.701542 | 3.495747  |
| 35 | 1  | 3.190721  | -2.027820 | 2.698383  |
| 36 | 1  | 3.538368  | 2.230011  | 1.116020  |
| 37 | 1  | 2.460715  | 2.087541  | 2.523540  |
| 38 | 1  | 1.124645  | 4.032989  | 1.741638  |
| 39 | 1  | 2.832628  | 4.495086  | 1.860077  |
| 40 | 1  | 2.122763  | 4.151660  | 0.270781  |
| 41 | 8  | -1.761175 | 0.175190  | -2.520934 |
| 42 | 8  | 3.499262  | -0.855295 | 0.322784  |
| 43 | 8  | -1.734444 | -3.198496 | 1.853341  |
| 44 | 8  | 1.619270  | 1.532866  | 0.779061  |
| 45 | 8  | 2.687636  | 1.956087  | -1.154515 |
| 46 | 14 | 4.998270  | -0.636990 | -0.592107 |
| 47 | 6  | -3.415853 | -0.940678 | -0.019337 |
| 48 | 6  | -3.060823 | 1.400852  | 0.378988  |
| 49 | 6  | -3.988213 | -1.062780 | 1.239176  |
| 50 | 6  | -3.631492 | 1.270365  | 1.645683  |
| 51 | 6  | -4.039840 | 0.030205  | 2.097355  |
| 52 | 1  | -4.379105 | -2.015443 | 1.563595  |
| 53 | 1  | -3.738940 | 2.143882  | 2.275928  |
| 54 | 1  | -4.443484 | -0.082879 | 3.098688  |
| 55 | 7  | -2.872856 | 0.274569  | -0.360528 |
| 56 | 6  | -2.733230 | 2.819325  | -0.128598 |
| 57 | 6  | -3.529747 | -2.073569 | -1.056988 |
| 58 | 6  | -1.573681 | 3.415541  | 0.683741  |
| 59 | 1  | -1.417195 | 4.456295  | 0.378297  |
| 60 | 1  | -1.782376 | 3.405459  | 1.759258  |

|    |   |           |           |           |
|----|---|-----------|-----------|-----------|
| 61 | 1 | -0.650501 | 2.858301  | 0.500640  |
| 62 | 6 | -2.411297 | 2.936087  | -1.625260 |
| 63 | 1 | -3.117323 | 2.373728  | -2.242490 |
| 64 | 1 | -2.482696 | 3.993559  | -1.898483 |
| 65 | 1 | -1.400884 | 2.603512  | -1.865933 |
| 66 | 6 | -4.003197 | 3.669935  | 0.110245  |
| 67 | 1 | -4.864935 | 3.248650  | -0.418415 |
| 68 | 1 | -4.258918 | 3.768428  | 1.167718  |
| 69 | 1 | -3.825443 | 4.677321  | -0.278275 |
| 70 | 6 | -4.307289 | -1.505205 | -2.261461 |
| 71 | 1 | -4.492142 | -2.313465 | -2.977564 |
| 72 | 1 | -5.278081 | -1.111663 | -1.939129 |
| 73 | 1 | -3.746362 | -0.712900 | -2.759368 |
| 74 | 6 | -2.200384 | -2.702990 | -1.512482 |
| 75 | 1 | -2.436669 | -3.488582 | -2.238974 |
| 76 | 1 | -1.527219 | -1.999419 | -2.000704 |
| 77 | 1 | -1.703754 | -3.178190 | -0.662708 |
| 78 | 6 | -4.366864 | -3.224944 | -0.477764 |
| 79 | 1 | -3.873073 | -3.696409 | 0.378283  |
| 80 | 1 | -5.367742 | -2.897937 | -0.177752 |
| 81 | 1 | -4.486599 | -3.983715 | -1.256963 |

*Transition state 2 (TS2):*

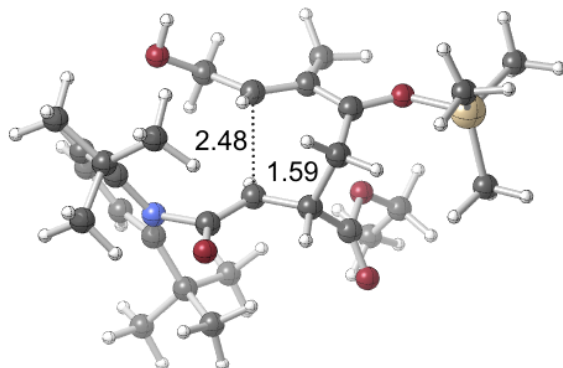

Charge = 1 Multiplicity = 1

HF = -1814.211054 hartrees (-1138435.57849554 kcal/mol)

Imaginary Frequencies: 1 (-212.4157 1/cm)

Zero-point correction = 0.707770 (Hartree/Particle)

Temperature 298.150 Kelvin. Pressure 1.00000 Atm.

Sum of electronic and thermal Free Energies =

-1813.572262 hartrees (-1138034.73012762 kcal/mol)

Coordinates (from last standard orientation):

| Center<br>Number | Atomic<br>Number | Coordinates (Angstroms) |           |           |
|------------------|------------------|-------------------------|-----------|-----------|
|                  |                  | X                       | Y         | Z         |
| 1                | 6                | -1.536014               | 0.075168  | -1.188308 |
| 2                | 6                | 0.907012                | 0.271283  | -1.183231 |
| 3                | 6                | -0.372974               | 0.207580  | -0.417792 |
| 4                | 6                | 0.147991                | -1.683711 | 1.097819  |
| 5                | 6                | 1.844901                | -1.009640 | -1.061311 |
| 6                | 6                | 1.452315                | -1.327306 | 1.392790  |
| 7                | 6                | 2.350729                | -1.173860 | 0.321052  |
| 8                | 6                | -0.920000               | -1.746677 | 2.156432  |
| 9                | 6                | 5.045246                | -2.407321 | -1.513933 |
| 10               | 6                | 6.384941                | -0.995392 | 0.889289  |
| 11               | 6                | 5.062216                | 0.706404  | -1.312324 |
| 12               | 6                | 1.877228                | -0.923066 | 2.783306  |
| 13               | 6                | 1.670624                | 1.538860  | -0.846372 |
| 14               | 6                | 2.912488                | 2.650960  | 0.848875  |
| 15               | 6                | 2.034982                | 3.766881  | 1.374509  |
| 16               | 1                | 0.666144                | 0.335032  | -2.246822 |
| 17               | 1                | -0.084993               | -2.198085 | 0.174091  |
| 18               | 1                | 2.660833                | -0.910635 | -1.779001 |
| 19               | 1                | 1.230194                | -1.859641 | -1.369578 |
| 20               | 1                | -0.465177               | -1.878261 | 3.146295  |
| 21               | 1                | -1.465802               | -0.793763 | 2.185549  |
| 22               | 1                | 6.052262                | -2.541409 | -1.926529 |
| 23               | 1                | 4.792765                | -3.316181 | -0.956560 |
| 24               | 1                | 4.353463                | -2.318345 | -2.357107 |
| 25               | 1                | 6.285927                | -0.180699 | 1.614941  |
| 26               | 1                | 6.357043                | -1.943738 | 1.436086  |
| 27               | 1                | 7.370479                | -0.905698 | 0.418737  |
| 28               | 1                | 5.947483                | 0.732342  | -1.960038 |
| 29               | 1                | 4.186656                | 0.865633  | -1.950762 |
| 30               | 1                | 5.143981                | 1.548337  | -0.617267 |
| 31               | 1                | -1.449255               | -3.614733 | 2.044411  |
| 32               | 1                | 1.293764                | -0.058001 | 3.119680  |
| 33               | 1                | 1.727136                | -1.729352 | 3.508243  |
| 34               | 1                | 2.931233                | -0.645182 | 2.798260  |
| 35               | 1                | 3.523288                | 2.992560  | 0.010731  |
| 36               | 1                | 3.561518                | 2.246632  | 1.628640  |
| 37               | 1                | 1.392401                | 3.410193  | 2.185297  |
| 38               | 1                | 2.666685                | 4.571013  | 1.764319  |
| 39               | 1                | 1.410785                | 4.175300  | 0.575313  |
| 40               | 8                | -1.676796               | -0.131068 | -2.382430 |
| 41               | 8                | 3.614580                | -0.988280 | 0.596049  |

|    |    |           |           |           |
|----|----|-----------|-----------|-----------|
| 42 | 8  | -1.879401 | -2.754453 | 1.905847  |
| 43 | 8  | 2.123466  | 1.522360  | 0.415576  |
| 44 | 8  | 1.841128  | 2.459289  | -1.612412 |
| 45 | 14 | 5.041410  | -0.914617 | -0.392129 |
| 46 | 6  | -3.447407 | -0.987265 | 0.036058  |
| 47 | 6  | -3.005816 | 1.367839  | 0.332134  |
| 48 | 6  | -4.185617 | -0.978662 | 1.213488  |
| 49 | 6  | -3.729571 | 1.350755  | 1.521209  |
| 50 | 6  | -4.275036 | 0.169110  | 1.988173  |
| 51 | 1  | -4.675005 | -1.881171 | 1.545620  |
| 52 | 1  | -3.867393 | 2.271133  | 2.074132  |
| 53 | 1  | -4.811245 | 0.148165  | 2.931615  |
| 54 | 7  | -2.793000 | 0.176761  | -0.302112 |
| 55 | 6  | -2.568799 | 2.741295  | -0.226416 |
| 56 | 6  | -3.520570 | -2.196677 | -0.922426 |
| 57 | 6  | -1.519654 | 3.375216  | 0.699807  |
| 58 | 1  | -1.306454 | 4.392625  | 0.354480  |
| 59 | 1  | -1.868769 | 3.434281  | 1.736089  |
| 60 | 1  | -0.585016 | 2.807408  | 0.677855  |
| 61 | 6  | -2.045278 | 2.770518  | -1.670751 |
| 62 | 1  | -2.689178 | 2.210004  | -2.353587 |
| 63 | 1  | -2.038870 | 3.816529  | -1.991905 |
| 64 | 1  | -1.022468 | 2.400987  | -1.765337 |
| 65 | 6  | -3.841242 | 3.624223  | -0.222734 |
| 66 | 1  | -4.618978 | 3.191954  | -0.860954 |
| 67 | 1  | -4.256415 | 3.775905  | 0.775768  |
| 68 | 1  | -3.579570 | 4.608371  | -0.622558 |
| 69 | 6  | -4.257208 | -1.705446 | -2.188255 |
| 70 | 1  | -4.434088 | -2.562244 | -2.847372 |
| 71 | 1  | -5.231138 | -1.279256 | -1.922117 |
| 72 | 1  | -3.676351 | -0.957794 | -2.728437 |
| 73 | 6  | -2.193273 | -2.887815 | -1.290211 |
| 74 | 1  | -2.428799 | -3.679018 | -2.010342 |
| 75 | 1  | -1.458646 | -2.237028 | -1.760123 |
| 76 | 1  | -1.759991 | -3.358578 | -0.405506 |
| 77 | 6  | -4.393147 | -3.299654 | -0.299756 |
| 78 | 1  | -3.961456 | -3.680091 | 0.631075  |
| 79 | 1  | -5.417702 | -2.964143 | -0.111754 |
| 80 | 1  | -4.446856 | -4.128197 | -1.012041 |
| 81 | 1  | -0.441391 | 0.629744  | 0.575301  |

*Product:*

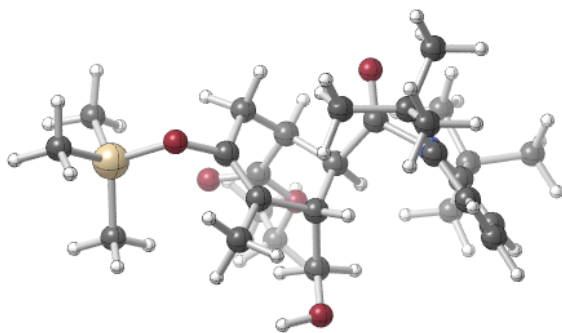

Charge = 1 Multiplicity = 1

HF = -1814.2760903 hartrees (-1138476.38942415 kcal/mol)

Imaginary Frequencies: none found

Zero-point correction = 0.713304 (Hartree/Particle)

Temperature 298.150 Kelvin. Pressure 1.00000 Atm.

Sum of electronic and thermal Free Energies =

-1813.631181 hartrees (-1138071.70238931 kcal/mol)

Coordinates (from last standard orientation):

| Center<br>Number | Atomic<br>Number | Coordinates (Angstroms) |           |           |
|------------------|------------------|-------------------------|-----------|-----------|
|                  |                  | X                       | Y         | Z         |
| 1                | 6                | -1.435818               | -0.217896 | -1.123592 |
| 2                | 6                | 0.735170                | 1.023805  | -1.188227 |
| 3                | 6                | -0.425885               | 0.554409  | -0.298719 |
| 4                | 6                | 0.045155                | -0.158236 | 0.998435  |
| 5                | 6                | 1.685563                | -0.113404 | -1.524719 |
| 6                | 6                | 1.341645                | -0.928091 | 0.833709  |
| 7                | 6                | 2.067410                | -0.886577 | -0.292944 |
| 8                | 6                | 0.100479                | 0.855389  | 2.169041  |
| 9                | 6                | 5.271834                | 0.094901  | -1.578383 |
| 10               | 6                | 5.827123                | -2.582100 | -0.162951 |
| 11               | 6                | 4.824215                | -0.127774 | 1.447064  |
| 12               | 6                | 1.767865                | -1.792843 | 1.993482  |
| 13               | 6                | 1.486432                | 2.161143  | -0.505081 |
| 14               | 6                | 1.226429                | 4.208648  | 0.666716  |
| 15               | 6                | 1.610961                | 5.279281  | -0.331826 |
| 16               | 1                | 0.322688                | 1.452280  | -2.110878 |
| 17               | 1                | -0.727360               | -0.874994 | 1.313473  |
| 18               | 1                | 2.586112                | 0.293257  | -1.991827 |

|    |    |           |           |           |
|----|----|-----------|-----------|-----------|
| 19 | 1  | 1.224586  | -0.788019 | -2.257174 |
| 20 | 1  | 0.999733  | 1.483082  | 2.097567  |
| 21 | 1  | -0.775322 | 1.513104  | 2.107923  |
| 22 | 1  | 6.339883  | 0.330164  | -1.491681 |
| 23 | 1  | 5.114868  | -0.368277 | -2.559024 |
| 24 | 1  | 4.718822  | 1.039496  | -1.545373 |
| 25 | 1  | 5.506253  | -3.273491 | 0.624036  |
| 26 | 1  | 5.771056  | -3.112124 | -1.120263 |
| 27 | 1  | 6.877865  | -2.330041 | 0.019526  |
| 28 | 1  | 5.796277  | 0.366493  | 1.562784  |
| 29 | 1  | 4.052653  | 0.650337  | 1.484045  |
| 30 | 1  | 4.685581  | -0.799008 | 2.300980  |
| 31 | 1  | 0.909402  | -0.063207 | 3.688678  |
| 32 | 1  | 2.348395  | -1.236472 | 2.741797  |
| 33 | 1  | 0.896230  | -2.216461 | 2.504525  |
| 34 | 1  | 2.402484  | -2.613127 | 1.648001  |
| 35 | 1  | 2.086937  | 3.868686  | 1.247565  |
| 36 | 1  | 0.445349  | 4.552161  | 1.347383  |
| 37 | 1  | 0.741170  | 5.586283  | -0.919495 |
| 38 | 1  | 1.995629  | 6.154582  | 0.199799  |
| 39 | 1  | 2.388832  | 4.917376  | -1.009454 |
| 40 | 8  | -1.360897 | -0.499464 | -2.275206 |
| 41 | 8  | 3.198453  | -1.644301 | -0.434659 |
| 42 | 8  | 0.021209  | 0.222504  | 3.429174  |
| 43 | 8  | 0.641879  | 3.070596  | -0.004331 |
| 44 | 8  | 2.690169  | 2.250291  | -0.436879 |
| 45 | 14 | 4.764511  | -1.046648 | -0.183100 |
| 46 | 6  | -2.800624 | -1.875693 | 0.155200  |
| 47 | 6  | -3.376883 | 0.479904  | 0.220305  |
| 48 | 6  | -3.522146 | -2.058959 | 1.324936  |
| 49 | 6  | -4.066067 | 0.270268  | 1.407950  |
| 50 | 6  | -4.093004 | -0.982418 | 1.991012  |
| 51 | 1  | -3.629583 | -3.050326 | 1.737801  |
| 52 | 1  | -4.596301 | 1.096128  | 1.865048  |
| 53 | 1  | -4.601419 | -1.136339 | 2.937247  |
| 54 | 7  | -2.667065 | -0.574666 | -0.303652 |
| 55 | 6  | -3.576818 | 1.838078  | -0.490086 |
| 56 | 6  | -2.247642 | -3.087099 | -0.621015 |
| 57 | 6  | -3.099656 | 3.001292  | 0.397126  |
| 58 | 1  | -3.460507 | 3.937719  | -0.039770 |
| 59 | 1  | -3.488521 | 2.934226  | 1.417087  |
| 60 | 1  | -2.006975 | 3.061945  | 0.443342  |
| 61 | 6  | -2.969145 | 1.995503  | -1.890905 |
| 62 | 1  | -3.254708 | 1.180443  | -2.561503 |
| 63 | 1  | -3.369377 | 2.923564  | -2.308869 |
| 64 | 1  | -1.882164 | 2.109618  | -1.892340 |



|    |   |           |           |           |
|----|---|-----------|-----------|-----------|
| 65 | 6 | -5.111036 | 1.956109  | -0.681611 |
| 66 | 1 | -5.496361 | 1.124793  | -1.280486 |
| 67 | 1 | -5.652422 | 1.983445  | 0.266586  |
| 68 | 1 | -5.319964 | 2.889402  | -1.212763 |
| 69 | 6 | -2.879177 | -3.109657 | -2.028135 |
| 70 | 1 | -2.529783 | -4.006792 | -2.549400 |
| 71 | 1 | -3.970189 | -3.167559 | -1.950860 |
| 72 | 1 | -2.619787 | -2.240008 | -2.630075 |
| 73 | 6 | -0.709553 | -3.140594 | -0.673761 |
| 74 | 1 | -0.420984 | -4.096047 | -1.123200 |
| 75 | 1 | -0.247343 | -2.358815 | -1.276416 |
| 76 | 1 | -0.286954 | -3.101877 | 0.335890  |
| 77 | 6 | -2.689874 | -4.388152 | 0.071297  |
| 78 | 1 | -2.252161 | -4.499067 | 1.068347  |
| 79 | 1 | -3.778519 | -4.466830 | 0.146579  |
| 80 | 1 | -2.339165 | -5.224472 | -0.539243 |
| 81 | 1 | -0.986841 | 1.438086  | 0.022347  |

*DAL with acylammonium ion formed with Et<sub>3</sub>N (endo):*

*Transition state (TS1):*

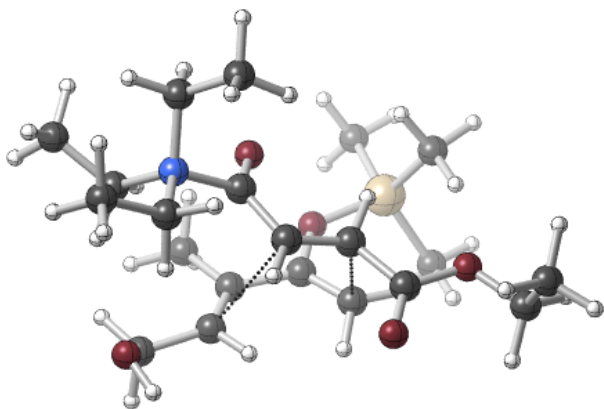

Charge = 1 Multiplicity = 1

HF = -1543.9526324 hartrees (-968845.716357324 kcal/mol)

Imaginary Frequencies: 1 (-290.1271 1/cm)

Zero-point correction = 0.598902 (Hartree/Particle)

Temperature 298.150 Kelvin. Pressure 1.00000 Atm.

Sum of electronic and thermal Free Energies =

-1543.419726 hartrees (-968511.31226226 kcal/mol)

Coordinates (from last standard orientation):

| Center<br>Number | Atomic<br>Number | Coordinates (Angstroms) |           |           |
|------------------|------------------|-------------------------|-----------|-----------|
|                  |                  | X                       | Y         | Z         |
| 1                | 6                | 1.305621                | 0.134358  | 0.679132  |
| 2                | 6                | 0.691631                | 1.172388  | -0.077880 |
| 3                | 6                | -0.679957               | 1.282919  | 0.060148  |
| 4                | 6                | 0.746670                | -0.913161 | -2.266531 |
| 5                | 6                | -1.817208               | -0.021155 | -1.256586 |
| 6                | 6                | 2.051495                | -1.241494 | -2.933053 |
| 7                | 6                | -1.277350               | -1.257899 | -0.957921 |
| 8                | 6                | -4.723815               | -1.912003 | -0.529723 |
| 9                | 6                | -3.340253               | -0.556723 | 1.902152  |
| 10               | 6                | -3.383086               | -3.634882 | 1.647663  |
| 11               | 6                | -0.002885               | -1.734682 | -1.497313 |
| 12               | 6                | -1.337570               | 2.496538  | -0.519389 |
| 13               | 6                | -3.268685               | 3.859363  | -0.433708 |
| 14               | 6                | -2.785659               | 5.122231  | 0.248346  |
| 15               | 6                | 0.416113                | -3.112524 | -1.060567 |
| 16               | 1                | 1.231733                | 1.842656  | -0.729512 |
| 17               | 1                | 0.359920                | 0.066741  | -2.538544 |
| 18               | 1                | -2.804600               | 0.232807  | -0.885366 |
| 19               | 1                | -1.514019               | 0.487847  | -2.162436 |
| 20               | 1                | -1.159910               | 0.833869  | 0.923071  |
| 21               | 1                | 2.555797                | -2.088694 | -2.464676 |
| 22               | 1                | 1.857311                | -1.517573 | -3.979988 |
| 23               | 1                | -4.626308               | -2.704710 | -1.279867 |
| 24               | 1                | -5.686903               | -2.053901 | -0.024628 |
| 25               | 1                | -4.766138               | -0.952026 | -1.053500 |
| 26               | 1                | -2.441646               | -0.563305 | 2.529169  |
| 27               | 1                | -3.395953               | 0.407402  | 1.384324  |
| 28               | 1                | -4.207429               | -0.621011 | 2.570667  |
| 29               | 1                | -3.332993               | -4.480542 | 0.953423  |
| 30               | 1                | -2.539260               | -3.714637 | 2.341320  |
| 31               | 1                | -4.307208               | -3.730767 | 2.228493  |
| 32               | 1                | -4.306328               | 3.637429  | -0.180674 |
| 33               | 1                | -3.166597               | 3.920884  | -1.519506 |
| 34               | 1                | -3.400760               | 5.968539  | -0.071362 |
| 35               | 1                | -2.867429               | 5.026281  | 1.334750  |
| 36               | 1                | -1.745517               | 5.333266  | -0.013645 |
| 37               | 1                | 2.625645                | 0.556817  | -3.442872 |
| 38               | 1                | 0.502821                | -3.142527 | 0.031300  |
| 39               | 1                | -0.340465               | -3.852511 | -1.340320 |
| 40               | 1                | 1.365802                | -3.416410 | -1.501562 |
| 41               | 8                | 0.732904                | -0.751142 | 1.277735  |

|    |    |           |           |           |
|----|----|-----------|-----------|-----------|
| 42 | 8  | -1.841615 | -2.091106 | -0.087111 |
| 43 | 8  | -0.848609 | 3.183129  | -1.387712 |
| 44 | 8  | -2.532337 | 2.708639  | 0.035770  |
| 45 | 8  | 2.964163  | -0.152814 | -2.872410 |
| 46 | 14 | -3.347868 | -2.014535 | 0.731049  |
| 47 | 7  | 2.857290  | 0.125217  | 0.832212  |
| 48 | 6  | 3.103176  | 0.181774  | 2.329246  |
| 49 | 1  | 2.584961  | -0.685173 | 2.739997  |
| 50 | 1  | 4.172990  | 0.050900  | 2.485004  |
| 51 | 6  | 3.500562  | 1.286544  | 0.110584  |
| 52 | 1  | 3.231265  | 1.158379  | -0.939850 |
| 53 | 1  | 3.032737  | 2.194390  | 0.491798  |
| 54 | 6  | 3.349199  | -1.201138 | 0.240370  |
| 55 | 1  | 2.484407  | -1.865804 | 0.240072  |
| 56 | 1  | 3.619124  | -0.967901 | -0.790873 |
| 57 | 6  | 4.497717  | -1.879772 | 0.968485  |
| 58 | 1  | 4.767095  | -2.757300 | 0.372928  |
| 59 | 1  | 5.388104  | -1.253975 | 1.058098  |
| 60 | 1  | 4.206503  | -2.232173 | 1.960127  |
| 61 | 6  | 2.615352  | 1.468818  | 2.969252  |
| 62 | 1  | 1.562032  | 1.669860  | 2.751456  |
| 63 | 1  | 2.715757  | 1.358548  | 4.052299  |
| 64 | 1  | 3.210674  | 2.334300  | 2.667632  |
| 65 | 6  | 5.009575  | 1.365653  | 0.248626  |
| 66 | 1  | 5.511801  | 0.515322  | -0.218277 |
| 67 | 1  | 5.331037  | 2.266066  | -0.282710 |
| 68 | 1  | 5.341174  | 1.461039  | 1.285884  |

Intermediate (INT):

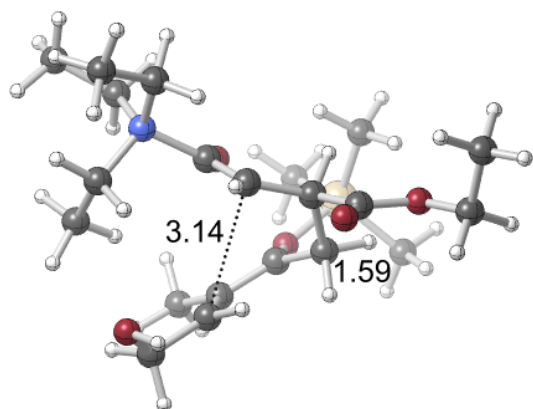

Charge = 1 Multiplicity = 1

HF = -1543.9613262 hartrees (-968851.171803762 kcal/mol)

Imaginary Frequencies: none found

Zero-point correction = 0.601472 (Hartree/Particle)

Temperature 298.150 Kelvin. Pressure 1.00000 Atm.

Sum of electronic and thermal Free Energies =

-1543.424930 hartrees (-968514.5778243 kcal/mol)

Coordinates (from last standard orientation):

| Center<br>Number | Atomic<br>Number | Coordinates (Angstroms) |           |           |
|------------------|------------------|-------------------------|-----------|-----------|
|                  |                  | X                       | Y         | Z         |
| 1                | 6                | 1.130325                | 0.173182  | 0.675130  |
| 2                | 6                | 0.540825                | 1.246473  | 0.071970  |
| 3                | 6                | -0.949332               | 1.215647  | 0.070999  |
| 4                | 6                | 0.539152                | -0.457569 | -2.562849 |
| 5                | 6                | -1.706951               | 0.169896  | -0.855875 |
| 6                | 6                | 1.679637                | -0.538222 | -3.534481 |
| 7                | 6                | -1.097760               | -1.181987 | -0.958694 |
| 8                | 6                | -4.443184               | -2.468998 | 0.007070  |
| 9                | 6                | -2.683260               | -1.043490 | 2.155092  |
| 10               | 6                | -2.285242               | -4.058066 | 1.592898  |
| 11               | 6                | -0.007532               | -1.480658 | -1.862540 |
| 12               | 6                | -1.535390               | 2.568413  | -0.293137 |
| 13               | 6                | -3.531113               | 3.843811  | -0.301496 |
| 14               | 6                | -3.288106               | 4.890410  | 0.765540  |
| 15               | 6                | 0.450571                | -2.913173 | -1.901037 |
| 16               | 1                | 1.056279                | 2.136161  | -0.260684 |

|    |    |           |           |           |
|----|----|-----------|-----------|-----------|
| 17 | 1  | 0.114340  | 0.539037  | -2.483202 |
| 18 | 1  | -2.725471 | 0.079526  | -0.473003 |
| 19 | 1  | -1.780933 | 0.582862  | -1.864077 |
| 20 | 1  | -1.302971 | 0.970421  | 1.078053  |
| 21 | 1  | 2.263360  | -1.451642 | -3.413290 |
| 22 | 1  | 1.262156  | -0.548258 | -4.553249 |
| 23 | 1  | -4.444472 | -3.254728 | -0.755848 |
| 24 | 1  | -5.254410 | -2.683520 | 0.712253  |
| 25 | 1  | -4.670146 | -1.515300 | -0.481437 |
| 26 | 1  | -1.633862 | -0.846880 | 2.398044  |
| 27 | 1  | -3.153789 | -0.113246 | 1.818908  |
| 28 | 1  | -3.191716 | -1.359249 | 3.074320  |
| 29 | 1  | -2.283037 | -4.828515 | 0.814583  |
| 30 | 1  | -1.275642 | -3.992817 | 2.012859  |
| 31 | 1  | -2.962713 | -4.383870 | 2.389770  |
| 32 | 1  | -4.582835 | 3.557003  | -0.348104 |
| 33 | 1  | -3.207683 | 4.189714  | -1.285937 |
| 34 | 1  | -3.872692 | 5.786942  | 0.538291  |
| 35 | 1  | -3.595071 | 4.516995  | 1.746604  |
| 36 | 1  | -2.231534 | 5.167585  | 0.802997  |
| 37 | 1  | 2.133279  | 1.355279  | -3.654548 |
| 38 | 1  | 0.727719  | -3.244551 | -0.894852 |
| 39 | 1  | -0.357485 | -3.564919 | -2.248587 |
| 40 | 1  | 1.303386  | -3.050554 | -2.566343 |
| 41 | 8  | 0.583195  | -0.908560 | 0.966786  |
| 42 | 8  | -1.613992 | -2.189937 | -0.355744 |
| 43 | 8  | -0.929164 | 3.473593  | -0.817669 |
| 44 | 8  | -2.837157 | 2.617683  | 0.012043  |
| 45 | 8  | 2.578968  | 0.543073  | -3.363033 |
| 46 | 14 | -2.813541 | -2.416120 | 0.906006  |
| 47 | 7  | 2.672153  | 0.293778  | 1.050286  |
| 48 | 6  | 3.486191  | 0.217134  | -0.221430 |
| 49 | 1  | 3.066686  | 0.959705  | -0.902994 |
| 50 | 1  | 4.510237  | 0.502539  | 0.018632  |
| 51 | 6  | 2.983632  | -0.857482 | 1.977356  |
| 52 | 1  | 2.290634  | -0.755689 | 2.813937  |
| 53 | 1  | 2.708965  | -1.765636 | 1.446449  |
| 54 | 6  | 2.903253  | 1.611763  | 1.786165  |
| 55 | 1  | 2.145622  | 2.306195  | 1.435317  |
| 56 | 1  | 2.687865  | 1.397158  | 2.835546  |
| 57 | 6  | 4.270630  | 2.260098  | 1.629695  |
| 58 | 1  | 4.287529  | 3.121277  | 2.304794  |
| 59 | 1  | 5.105004  | 1.610561  | 1.899219  |
| 60 | 1  | 4.428163  | 2.636483  | 0.616115  |
| 61 | 6  | 3.472849  | -1.159288 | -0.856643 |
| 62 | 1  | 2.457808  | -1.553421 | -0.944603 |

|    |   |          |           |           |
|----|---|----------|-----------|-----------|
| 63 | 1 | 3.899537 | -1.065454 | -1.858427 |
| 64 | 1 | 4.079809 | -1.874783 | -0.295559 |
| 65 | 6 | 4.418631 | -0.909770 | 2.469749  |
| 66 | 1 | 4.651223 | -0.093040 | 3.157186  |
| 67 | 1 | 4.540975 | -1.847069 | 3.020255  |
| 68 | 1 | 5.148612 | -0.908613 | 1.654567  |

Transition state 2 (TS2):

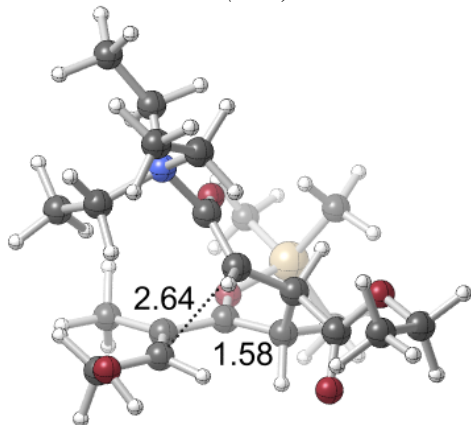

Charge = 1 Multiplicity = 1

HF = -1543.9595835 hartrees (-968850.078242085 kcal/mol)

Imaginary Frequencies: 1 (-114.5760 1/cm)

Zero-point correction = 0.601943 (Hartree/Particle)

Temperature 298.150 Kelvin. Pressure 1.00000 Atm.

Sum of electronic and thermal Free Energies =

-1543.421457 hartrees (-968512.39848207 kcal/mol)

Coordinates (from last standard orientation):

| Center Number | Atomic Number | Coordinates (Angstroms) |           |           |
|---------------|---------------|-------------------------|-----------|-----------|
|               |               | X                       | Y         | Z         |
| 1             | 6             | -0.818241               | -0.623805 | -0.615659 |
| 2             | 6             | -0.924943               | 0.603871  | 0.007939  |
| 3             | 6             | 0.248613                | 1.512896  | -0.230884 |
| 4             | 6             | -0.013930               | -0.127056 | 2.371868  |
| 5             | 6             | 1.585394                | 1.314363  | 0.594572  |
| 6             | 6             | -1.042065               | -0.700406 | 3.298480  |
| 7             | 6             | 1.905078                | -0.077637 | 0.983455  |
| 8             | 6             | 5.263427                | 0.884316  | -0.167062 |
| 9             | 6             | 3.023575                | 0.284387  | -2.264400 |

|    |    |           |           |           |
|----|----|-----------|-----------|-----------|
| 10 | 6  | 4.761112  | -2.014888 | -1.151884 |
| 11 | 6  | 1.108668  | -0.776174 | 1.922684  |
| 12 | 6  | -0.239718 | 2.927688  | 0.021092  |
| 13 | 6  | -1.374592 | 4.767788  | -0.929813 |
| 14 | 6  | -2.770537 | 4.617433  | -0.360725 |
| 15 | 6  | 1.491409  | -2.189636 | 2.271347  |
| 16 | 1  | -1.850890 | 1.002145  | 0.403243  |
| 17 | 1  | -0.105348 | 0.947096  | 2.249610  |
| 18 | 1  | 2.400790  | 1.747716  | 0.012102  |
| 19 | 1  | 1.490745  | 1.910035  | 1.506870  |
| 20 | 1  | 0.539256  | 1.420207  | -1.281331 |
| 21 | 1  | -1.212800 | -1.761768 | 3.113398  |
| 22 | 1  | -0.651064 | -0.613713 | 4.325966  |
| 23 | 1  | 5.768922  | 0.495162  | 0.723332  |
| 24 | 1  | 6.028517  | 1.077969  | -0.927987 |
| 25 | 1  | 4.803142  | 1.843576  | 0.093323  |
| 26 | 1  | 2.061611  | -0.237635 | -2.314140 |
| 27 | 1  | 2.835758  | 1.362083  | -2.217868 |
| 28 | 1  | 3.570062  | 0.083067  | -3.193561 |
| 29 | 1  | 5.244943  | -2.420969 | -0.257390 |
| 30 | 1  | 3.993053  | -2.724733 | -1.477170 |
| 31 | 1  | 5.516668  | -1.950798 | -1.943023 |
| 32 | 1  | -1.394850 | 5.179973  | -1.939527 |
| 33 | 1  | -0.744533 | 5.395977  | -0.296574 |
| 34 | 1  | -3.253609 | 5.597644  | -0.308486 |
| 35 | 1  | -3.377641 | 3.967129  | -0.997410 |
| 36 | 1  | -2.735111 | 4.198205  | 0.648501  |
| 37 | 1  | -2.205789 | 0.852387  | 3.495726  |
| 38 | 1  | 1.593383  | -2.804229 | 1.371477  |
| 39 | 1  | 2.462061  | -2.197807 | 2.779226  |
| 40 | 1  | 0.763879  | -2.655757 | 2.938493  |
| 41 | 8  | 0.230052  | -1.157123 | -0.985901 |
| 42 | 8  | 2.936596  | -0.702799 | 0.498661  |
| 43 | 8  | -0.224014 | 3.465249  | 1.107227  |
| 44 | 8  | -0.742932 | 3.478070  | -1.082191 |
| 45 | 8  | -2.295785 | -0.059072 | 3.172353  |
| 46 | 14 | 4.019874  | -0.343496 | -0.818477 |
| 47 | 7  | -2.148947 | -1.447745 | -0.873925 |
| 48 | 6  | -2.610974 | -2.027069 | 0.445768  |
| 49 | 1  | -2.688384 | -1.184113 | 1.138704  |
| 50 | 1  | -3.607643 | -2.442125 | 0.298380  |
| 51 | 6  | -1.800251 | -2.536496 | -1.864590 |
| 52 | 1  | -1.426063 | -2.018014 | -2.749145 |
| 53 | 1  | -0.965373 | -3.088791 | -1.441402 |
| 54 | 6  | -3.202967 | -0.529977 | -1.495254 |
| 55 | 1  | -2.950520 | 0.486936  | -1.207211 |

|    |   |           |           |           |
|----|---|-----------|-----------|-----------|
| 56 | 1 | -3.051762 | -0.606115 | -2.574316 |
| 57 | 6 | -4.652955 | -0.804982 | -1.129583 |
| 58 | 1 | -5.262378 | -0.127953 | -1.735933 |
| 59 | 1 | -4.975916 | -1.825392 | -1.345838 |
| 60 | 1 | -4.858951 | -0.582875 | -0.079877 |
| 61 | 6 | -1.677224 | -3.102748 | 0.969097  |
| 62 | 1 | -0.641568 | -2.756732 | 1.005190  |
| 63 | 1 | -1.995034 | -3.370657 | 1.980445  |
| 64 | 1 | -1.722043 | -4.012850 | 0.365658  |
| 65 | 6 | -2.954032 | -3.454270 | -2.221906 |
| 66 | 1 | -3.740719 | -2.940664 | -2.779228 |
| 67 | 1 | -2.555468 | -4.241706 | -2.868104 |
| 68 | 1 | -3.395355 | -3.938929 | -1.346413 |

*Product:*

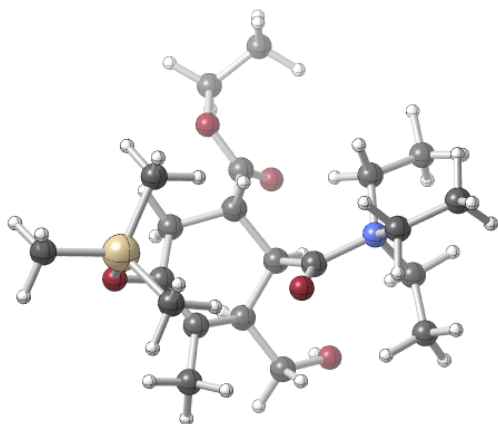

Charge = 1 Multiplicity = 1

HF = -1544.0211088 hartrees (-968888.685983088 kcal/mol)

Imaginary Frequencies: none found

Zero-point correction = 0.605365 (Hartree/Particle)

Temperature 298.150 Kelvin. Pressure 1.00000 Atm.

Sum of electronic and thermal Free Energies =

-1543.478691 hartrees (-968548.31338941 kcal/mol)

Coordinates (from last standard orientation):

```

-----
Center  Atomic      Coordinates (Angstroms)
Number  Number          X       Y       Z
-----

```



|    |    |           |           |           |
|----|----|-----------|-----------|-----------|
| 1  | 6  | 0.848752  | -1.073365 | 0.175664  |
| 2  | 6  | 0.629354  | -0.072574 | -0.944440 |
| 3  | 6  | -0.018211 | 1.226576  | -0.380029 |
| 4  | 6  | -0.261853 | -0.701717 | -2.052033 |
| 5  | 6  | -1.457661 | 1.472807  | -0.907241 |
| 6  | 6  | 0.349576  | -1.984665 | -2.619340 |
| 7  | 6  | -2.248744 | 0.197633  | -1.007774 |
| 8  | 6  | -5.731797 | 0.286342  | 1.219969  |
| 9  | 6  | -2.870955 | 0.952685  | 2.189668  |
| 10 | 6  | -3.556203 | -1.914519 | 1.407237  |
| 11 | 6  | -1.698090 | -0.875855 | -1.585792 |
| 12 | 6  | 0.826260  | 2.447022  | -0.726889 |
| 13 | 6  | 0.995348  | 4.788880  | -0.447109 |
| 14 | 6  | 2.175449  | 4.952303  | 0.487724  |
| 15 | 6  | -2.425326 | -2.174617 | -1.780392 |
| 16 | 1  | 1.587152  | 0.193032  | -1.394678 |
| 17 | 1  | -0.235063 | 0.048997  | -2.859404 |
| 18 | 1  | -1.960711 | 2.187615  | -0.253503 |
| 19 | 1  | -1.389341 | 1.935470  | -1.902180 |
| 20 | 1  | -0.077352 | 1.189104  | 0.714308  |
| 21 | 1  | 0.241365  | -2.812175 | -1.911890 |
| 22 | 1  | -0.183272 | -2.270125 | -3.533991 |
| 23 | 1  | -6.336114 | -0.324203 | 0.540411  |
| 24 | 1  | -6.078878 | 0.091043  | 2.241069  |
| 25 | 1  | -5.928944 | 1.339826  | 0.994294  |
| 26 | 1  | -1.801653 | 0.741888  | 2.065283  |
| 27 | 1  | -3.033084 | 2.022825  | 2.021840  |
| 28 | 1  | -3.122333 | 0.737449  | 3.235434  |
| 29 | 1  | -4.186851 | -2.583355 | 0.812258  |
| 30 | 1  | -2.507606 | -2.150639 | 1.192305  |
| 31 | 1  | -3.739566 | -2.133472 | 2.466072  |
| 32 | 1  | 0.239382  | 5.557049  | -0.280168 |
| 33 | 1  | 1.301614  | 4.805773  | -1.494959 |
| 34 | 1  | 2.647303  | 5.924217  | 0.315734  |
| 35 | 1  | 1.848731  | 4.908217  | 1.530594  |
| 36 | 1  | 2.922019  | 4.172516  | 0.312947  |
| 37 | 1  | 1.856755  | -1.243631 | -3.611062 |
| 38 | 1  | -1.992655 | -2.975618 | -1.168417 |
| 39 | 1  | -3.475780 | -2.065616 | -1.502680 |
| 40 | 1  | -2.386975 | -2.504514 | -2.825085 |
| 41 | 8  | 0.039745  | -1.853972 | 0.568759  |
| 42 | 8  | -3.542365 | 0.242490  | -0.557954 |
| 43 | 8  | 1.823779  | 2.435038  | -1.415201 |
| 44 | 8  | 0.304713  | 3.545247  | -0.186749 |
| 45 | 8  | 1.739570  | -1.855119 | -2.865002 |
| 46 | 14 | -3.917481 | -0.112129 | 1.054860  |

|    |   |          |           |           |
|----|---|----------|-----------|-----------|
| 47 | 7 | 2.245401 | -1.117944 | 0.870921  |
| 48 | 6 | 3.185797 | -1.841371 | -0.090722 |
| 49 | 1 | 3.152988 | -1.288288 | -1.030382 |
| 50 | 1 | 4.183631 | -1.747190 | 0.334139  |
| 51 | 6 | 2.079069 | -1.890370 | 2.168283  |
| 52 | 1 | 1.310829 | -1.356562 | 2.731660  |
| 53 | 1 | 1.677169 | -2.864413 | 1.899716  |
| 54 | 6 | 2.733621 | 0.300943  | 1.162640  |
| 55 | 1 | 2.320686 | 0.948607  | 0.395684  |
| 56 | 1 | 2.285598 | 0.570525  | 2.121609  |
| 57 | 6 | 4.239158 | 0.519272  | 1.160075  |
| 58 | 1 | 4.398626 | 1.547068  | 1.499674  |
| 59 | 1 | 4.789712 | -0.142699 | 1.828964  |
| 60 | 1 | 4.654738 | 0.438660  | 0.153543  |
| 61 | 6 | 2.844460 | -3.304117 | -0.306384 |
| 62 | 1 | 1.796114 | -3.471960 | -0.563325 |
| 63 | 1 | 3.447737 | -3.654918 | -1.147451 |
| 64 | 1 | 3.093675 | -3.913700 | 0.565824  |
| 65 | 6 | 3.348549 | -2.029946 | 2.984335  |
| 66 | 1 | 3.685742 | -1.077681 | 3.398259  |
| 67 | 1 | 3.113637 | -2.689038 | 3.824920  |
| 68 | 1 | 4.165038 | -2.492226 | 2.422631  |

*DAL with acylammonium ion formed with Et<sub>3</sub>N (exo):*

*Transition state 1 (TS1):*

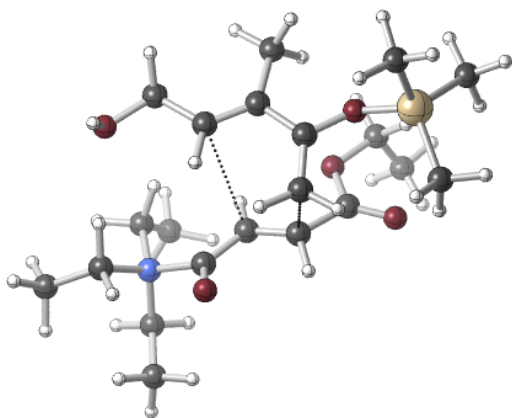

Charge = 1 Multiplicity = 1

HF = -1543.9494811 hartrees (-968843.738885061 kcal/mol)

Imaginary Frequencies: 1 (-370.8361 1/cm)

Zero-point correction = 0.598945 (Hartree/Particle)

Temperature 298.150 Kelvin. Pressure 1.00000 Atm.

Sum of electronic and thermal Free Energies =

-1543.414868 hartrees (-968508.26381868 kcal/mol)

Coordinates (from last standard orientation):

| Center<br>Number | Atomic<br>Number | Coordinates (Angstroms) |           |           |
|------------------|------------------|-------------------------|-----------|-----------|
|                  |                  | X                       | Y         | Z         |
| 1                | 6                | -2.231781               | 0.369460  | -0.925773 |
| 2                | 6                | 0.044435                | 1.090981  | -0.830686 |
| 3                | 6                | -1.130313               | 0.803045  | -0.140072 |
| 4                | 6                | -0.380273               | -2.092889 | 0.637917  |
| 5                | 6                | 1.043366                | -0.631213 | -1.457480 |
| 6                | 6                | 0.898358                | -1.691170 | 0.812986  |
| 7                | 6                | 1.623186                | -1.030553 | -0.264595 |
| 8                | 6                | -1.219628               | -2.747592 | 1.703464  |
| 9                | 6                | 4.145717                | 0.330509  | -2.473135 |
| 10               | 6                | 4.779038                | -2.364299 | -1.113951 |
| 11               | 6                | 5.469178                | 0.329774  | 0.294937  |
| 12               | 6                | 1.628743                | -1.841011 | 2.121472  |
| 13               | 6                | 1.199875                | 1.727335  | -0.122908 |
| 14               | 6                | 2.247038                | 2.048571  | 1.971831  |
| 15               | 6                | 2.151019                | 3.547643  | 2.168406  |
| 16               | 1                | -0.022697               | 1.360629  | -1.880889 |
| 17               | 1                | -1.156379               | 0.855228  | 0.935746  |
| 18               | 1                | -0.858352               | -2.024124 | -0.336793 |
| 19               | 1                | 1.678983                | -0.191782 | -2.217985 |
| 20               | 1                | 0.137944                | -1.104173 | -1.819577 |
| 21               | 1                | -0.713395               | -3.644857 | 2.087663  |
| 22               | 1                | -1.352603               | -2.071211 | 2.556384  |
| 23               | 1                | 5.155525                | 0.578487  | -2.824467 |
| 24               | 1                | 3.668124                | -0.270431 | -3.253854 |
| 25               | 1                | 3.593212                | 1.268590  | -2.357319 |
| 26               | 1                | 4.929015                | -2.882894 | -0.160828 |
| 27               | 1                | 3.993880                | -2.892648 | -1.667515 |
| 28               | 1                | 5.705714                | -2.443783 | -1.693528 |
| 29               | 1                | 6.501499                | 0.239670  | -0.062631 |
| 30               | 1                | 5.225530                | 1.397303  | 0.332409  |
| 31               | 1                | 5.428667                | -0.070992 | 1.313291  |
| 32               | 1                | -2.441921               | -3.819350 | 0.633598  |
| 33               | 1                | 1.961934                | -0.864410 | 2.486680  |
| 34               | 1                | 1.003314                | -2.302736 | 2.887299  |
| 35               | 1                | 2.526127                | -2.455705 | 1.993493  |

|    |    |           |           |           |
|----|----|-----------|-----------|-----------|
| 36 | 1  | 3.175320  | 1.758357  | 1.473721  |
| 37 | 1  | 2.169839  | 1.520488  | 2.923953  |
| 38 | 1  | 1.198518  | 3.813212  | 2.636106  |
| 39 | 1  | 2.961174  | 3.878516  | 2.825195  |
| 40 | 1  | 2.241278  | 4.074558  | 1.215802  |
| 41 | 8  | -2.203239 | 0.082646  | -2.106105 |
| 42 | 8  | 2.852565  | -0.631450 | 0.063943  |
| 43 | 8  | -2.520200 | -3.064778 | 1.240035  |
| 44 | 8  | 1.138086  | 1.545862  | 1.196961  |
| 45 | 8  | 2.103359  | 2.295863  | -0.695923 |
| 46 | 14 | 4.310601  | -0.576402 | -0.847305 |
| 47 | 7  | -3.630051 | 0.273378  | -0.253724 |
| 48 | 6  | -4.287654 | -0.995989 | -0.778212 |
| 49 | 1  | -4.091683 | -1.018093 | -1.847855 |
| 50 | 1  | -3.733345 | -1.808552 | -0.299825 |
| 51 | 6  | -4.410782 | 1.514800  | -0.652128 |
| 52 | 1  | -5.340242 | 1.468240  | -0.079062 |
| 53 | 1  | -3.828415 | 2.363865  | -0.289595 |
| 54 | 6  | -3.554407 | 0.168033  | 1.260586  |
| 55 | 1  | -2.719381 | -0.502551 | 1.463975  |
| 56 | 1  | -4.462909 | -0.348003 | 1.570025  |
| 57 | 6  | -5.777343 | -1.107786 | -0.504996 |
| 58 | 1  | -6.097519 | -2.079665 | -0.891879 |
| 59 | 1  | -6.031924 | -1.083027 | 0.557410  |
| 60 | 1  | -6.358943 | -0.341843 | -1.023704 |
| 61 | 6  | -4.686401 | 1.665778  | -2.137264 |
| 62 | 1  | -5.338017 | 2.537207  | -2.250854 |
| 63 | 1  | -3.775124 | 1.845824  | -2.708625 |
| 64 | 1  | -5.204126 | 0.804759  | -2.566197 |
| 65 | 6  | -3.445825 | 1.474993  | 2.031947  |
| 66 | 1  | -4.380935 | 2.038211  | 2.008021  |
| 67 | 1  | -3.245744 | 1.213006  | 3.075073  |
| 68 | 1  | -2.637847 | 2.125002  | 1.690111  |

Intermediate (INT):

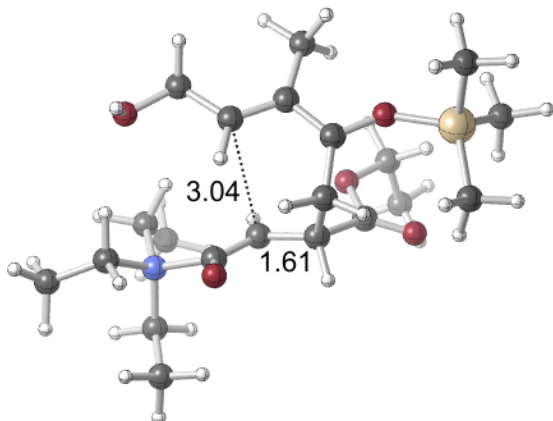

Charge = 1 Multiplicity = 1

HF = -1543.9613145 hartrees (-968851.164461895 kcal/mol)

Imaginary Frequencies: none found

Zero-point correction = 0.600705 (Hartree/Particle)

Temperature 298.150 Kelvin. Pressure 1.00000 Atm.

Sum of electronic and thermal Free Energies =

-1543.426124 hartrees (-968515.32707124 kcal/mol)

Coordinates (from last standard orientation):

| Center Number | Atomic Number | Coordinates (Angstroms) |           |           |
|---------------|---------------|-------------------------|-----------|-----------|
|               |               | X                       | Y         | Z         |
| 1             | 6             | 2.117550                | -0.194429 | -0.925447 |
| 2             | 6             | -0.217651               | -0.868286 | -0.882312 |
| 3             | 6             | 1.093602                | -0.741055 | -0.193214 |
| 4             | 6             | 0.420854                | 2.089176  | 0.705162  |
| 5             | 6             | -0.914159               | 0.514231  | -1.324435 |
| 6             | 6             | -0.891771               | 1.782167  | 0.890928  |
| 7             | 6             | -1.589331               | 1.117186  | -0.167782 |
| 8             | 6             | 1.278911                | 2.740892  | 1.748462  |
| 9             | 6             | -3.993746               | -0.152001 | -2.566495 |
| 10            | 6             | -5.175500               | 2.161271  | -0.899234 |
| 11            | 6             | -5.163292               | -0.732052 | 0.226903  |
| 12            | 6             | -1.655411               | 2.061775  | 2.157791  |
| 13            | 6             | -1.263490               | -1.646487 | -0.106710 |
| 14            | 6             | -2.063324               | -2.203327 | 2.056261  |
| 15            | 6             | -1.783866               | -3.689512 | 2.139241  |
| 16            | 1             | -0.104920               | -1.367544 | -1.850819 |

|    |    |           |           |           |
|----|----|-----------|-----------|-----------|
| 17 | 1  | 1.199515  | -1.100019 | 0.815950  |
| 18 | 1  | 0.896942  | 1.940114  | -0.260051 |
| 19 | 1  | -1.634022 | 0.287301  | -2.108234 |
| 20 | 1  | -0.112181 | 1.125625  | -1.739363 |
| 21 | 1  | 0.791431  | 3.661682  | 2.101398  |
| 22 | 1  | 1.364842  | 2.079211  | 2.619352  |
| 23 | 1  | -4.972197 | -0.421219 | -2.986466 |
| 24 | 1  | -3.542872 | 0.581950  | -3.241411 |
| 25 | 1  | -3.382473 | -1.059358 | -2.549367 |
| 26 | 1  | -5.328596 | 2.557385  | 0.110072  |
| 27 | 1  | -4.600778 | 2.896693  | -1.472649 |
| 28 | 1  | -6.157487 | 2.058934  | -1.375192 |
| 29 | 1  | -6.209664 | -0.829603 | -0.086221 |
| 30 | 1  | -4.690144 | -1.714248 | 0.134437  |
| 31 | 1  | -5.156085 | -0.427569 | 1.278605  |
| 32 | 1  | 2.556178  | 3.754751  | 0.688693  |
| 33 | 1  | -2.058184 | 1.131512  | 2.571799  |
| 34 | 1  | -1.028117 | 2.531939  | 2.916435  |
| 35 | 1  | -2.505194 | 2.721857  | 1.956259  |
| 36 | 1  | -3.064958 | -1.998923 | 1.672355  |
| 37 | 1  | -1.946364 | -1.721733 | 3.028326  |
| 38 | 1  | -0.765254 | -3.868455 | 2.495458  |
| 39 | 1  | -2.481894 | -4.151150 | 2.843843  |
| 40 | 1  | -1.910250 | -4.166255 | 1.164139  |
| 41 | 8  | 2.068197  | 0.334464  | -2.043711 |
| 42 | 8  | -2.848382 | 0.905674  | 0.032854  |
| 43 | 8  | 2.591004  | 2.997753  | 1.296250  |
| 44 | 8  | -1.097862 | -1.539080 | 1.213137  |
| 45 | 8  | -2.194097 | -2.225301 | -0.626139 |
| 46 | 14 | -4.313063 | 0.512351  | -0.857335 |
| 47 | 7  | 3.572627  | -0.266168 | -0.295460 |
| 48 | 6  | 4.325987  | 0.959777  | -0.767751 |
| 49 | 1  | 4.079875  | 1.079783  | -1.820125 |
| 50 | 1  | 3.879659  | 1.789609  | -0.213827 |
| 51 | 6  | 4.213075  | -1.535708 | -0.810098 |
| 52 | 1  | 5.193531  | -1.610263 | -0.332307 |
| 53 | 1  | 3.590621  | -2.354215 | -0.446205 |
| 54 | 6  | 3.554641  | -0.241858 | 1.225391  |
| 55 | 1  | 2.704063  | 0.384559  | 1.493792  |
| 56 | 1  | 4.457949  | 0.284659  | 1.534879  |
| 57 | 6  | 5.830721  | 0.903079  | -0.566280 |
| 58 | 1  | 6.232547  | 1.882437  | -0.841932 |
| 59 | 1  | 6.127102  | 0.708339  | 0.468286  |
| 60 | 1  | 6.308845  | 0.160713  | -1.210061 |
| 61 | 6  | 4.337851  | -1.613236 | -2.321814 |
| 62 | 1  | 4.848081  | -2.551465 | -2.558742 |

|    |   |          |           |           |
|----|---|----------|-----------|-----------|
| 63 | 1 | 3.362509 | -1.616802 | -2.810256 |
| 64 | 1 | 4.931178 | -0.795400 | -2.738578 |
| 65 | 6 | 3.510559 | -1.583379 | 1.943091  |
| 66 | 1 | 4.435200 | -2.148600 | 1.806469  |
| 67 | 1 | 3.412611 | -1.368047 | 3.011450  |
| 68 | 1 | 2.669292 | -2.215348 | 1.651651  |

Transition state 2 (TS2):

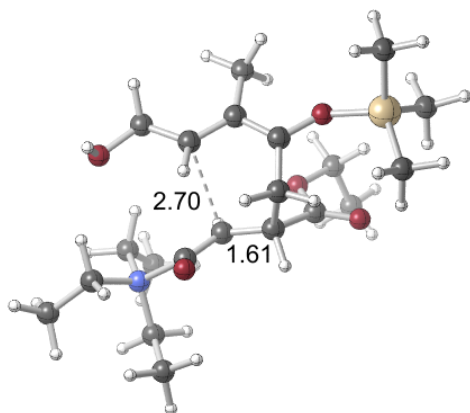

Charge = 1 Multiplicity = 1

HF = -1543.9607073 hartrees (-968850.783437823 kcal/mol)

Imaginary Frequencies: 1 (-98.0985 1/cm)

Zero-point correction = 0.600784 (Hartree/Particle)

Temperature 298.150 Kelvin. Pressure 1.00000 Atm.

Sum of electronic and thermal Free Energies =

-1543.424214 hartrees (-968514.12852714 kcal/mol)

Coordinates (from last standard orientation):

| Center<br>Number | Atomic<br>Number | Coordinates (Angstroms) |           |           |
|------------------|------------------|-------------------------|-----------|-----------|
|                  |                  | X                       | Y         | Z         |
| 1                | 6                | -2.155448               | -0.066149 | -0.853844 |
| 2                | 6                | 0.170589                | 0.665987  | -0.900679 |
| 3                | 6                | -1.095378               | 0.476278  | -0.145072 |
| 4                | 6                | -0.385880               | -1.950788 | 0.802044  |
| 5                | 6                | 0.980934                | -0.666371 | -1.304406 |
| 6                | 6                | 0.945761                | -1.673243 | 0.996071  |
| 7                | 6                | 1.667301                | -1.149031 | -0.098482 |
| 8                | 6                | -1.289258               | -2.417602 | 1.903567  |
| 9                | 6                | 4.076744                | -0.123931 | -2.581143 |

|    |    |           |           |           |
|----|----|-----------|-----------|-----------|
| 10 | 6  | 5.313324  | -2.141912 | -0.604683 |
| 11 | 6  | 5.179152  | 0.870206  | 0.116999  |
| 12 | 6  | 1.640324  | -1.755737 | 2.329639  |
| 13 | 6  | 1.190986  | 1.555803  | -0.215186 |
| 14 | 6  | 2.000992  | 2.343997  | 1.869122  |
| 15 | 6  | 1.709793  | 3.828647  | 1.799301  |
| 16 | 1  | -0.028507 | 1.105887  | -1.884101 |
| 17 | 1  | -1.209884 | 0.952670  | 0.813698  |
| 18 | 1  | -0.794052 | -2.054226 | -0.198914 |
| 19 | 1  | 1.689219  | -0.394384 | -2.083261 |
| 20 | 1  | 0.239985  | -1.357142 | -1.707842 |
| 21 | 1  | -0.844679 | -3.300533 | 2.386676  |
| 22 | 1  | -1.370383 | -1.647063 | 2.679396  |
| 23 | 1  | 5.058930  | 0.053283  | -3.038769 |
| 24 | 1  | 3.598390  | -0.932973 | -3.142284 |
| 25 | 1  | 3.488695  | 0.792508  | -2.692264 |
| 26 | 1  | 4.763031  | -2.978302 | -1.049216 |
| 27 | 1  | 6.283635  | -2.074148 | -1.109849 |
| 28 | 1  | 5.497377  | -2.374496 | 0.449539  |
| 29 | 1  | 6.212264  | 0.988480  | -0.230960 |
| 30 | 1  | 4.648725  | 1.808292  | -0.074722 |
| 31 | 1  | 5.208358  | 0.692242  | 1.197138  |
| 32 | 1  | -2.570840 | -3.522805 | 0.944055  |
| 33 | 1  | 2.554197  | -2.352068 | 2.248848  |
| 34 | 1  | 1.935574  | -0.755614 | 2.667240  |
| 35 | 1  | 1.006974  | -2.204997 | 3.096405  |
| 36 | 1  | 3.000607  | 2.106454  | 1.498899  |
| 37 | 1  | 1.896465  | 1.965358  | 2.887025  |
| 38 | 1  | 0.690201  | 4.034611  | 2.137961  |
| 39 | 1  | 2.404792  | 4.367125  | 2.450476  |
| 40 | 1  | 1.830048  | 4.203342  | 0.780035  |
| 41 | 8  | -2.107588 | -0.695991 | -1.910179 |
| 42 | 8  | 2.920648  | -0.852476 | 0.111343  |
| 43 | 8  | -2.598156 | -2.695760 | 1.452987  |
| 44 | 8  | 1.034840  | 1.587146  | 1.108826  |
| 45 | 8  | 2.103659  | 2.095099  | -0.804027 |
| 46 | 14 | 4.377183  | -0.541609 | -0.789859 |
| 47 | 7  | -3.610286 | 0.184838  | -0.298514 |
| 48 | 6  | -4.460171 | -1.016110 | -0.665190 |
| 49 | 1  | -4.190629 | -1.278109 | -1.685794 |
| 50 | 1  | -4.113130 | -1.811299 | -0.003253 |
| 51 | 6  | -4.122314 | 1.438216  | -0.978614 |
| 52 | 1  | -5.106418 | 1.638306  | -0.547211 |
| 53 | 1  | -3.447513 | 2.241505  | -0.680493 |
| 54 | 6  | -3.643209 | 0.342091  | 1.215304  |
| 55 | 1  | -2.868905 | -0.324884 | 1.590770  |



|    |   |           |           |           |
|----|---|-----------|-----------|-----------|
| 56 | 1 | -4.602582 | -0.059576 | 1.542334  |
| 57 | 6 | -5.958664 | -0.799553 | -0.539046 |
| 58 | 1 | -6.440862 | -1.766741 | -0.708793 |
| 59 | 1 | -6.267618 | -0.451574 | 0.450663  |
| 60 | 1 | -6.345237 | -0.103980 | -1.287831 |
| 61 | 6 | -4.196277 | 1.356934  | -2.493328 |
| 62 | 1 | -4.630921 | 2.296510  | -2.846772 |
| 63 | 1 | -3.210033 | 1.242326  | -2.945249 |
| 64 | 1 | -4.834460 | 0.541094  | -2.841854 |
| 65 | 6 | -3.496730 | 1.749930  | 1.775041  |
| 66 | 1 | -4.360937 | 2.375226  | 1.540396  |
| 67 | 1 | -3.447981 | 1.651790  | 2.863779  |
| 68 | 1 | -2.593106 | 2.266451  | 1.445622  |

*Product:*

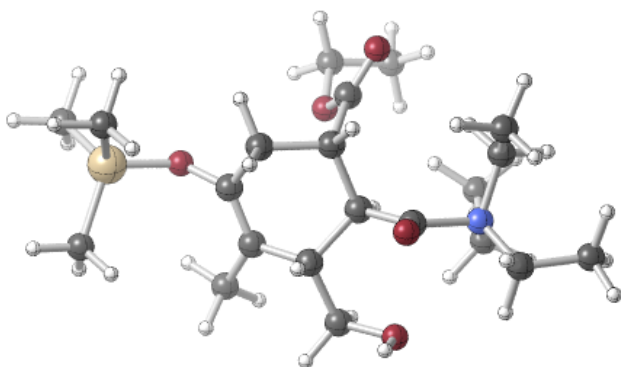

Charge = 1 Multiplicity = 1

HF = -1544.0255228 hartrees (-968891.455812228 kcal/mol)

Imaginary Frequencies: none found

Zero-point correction = 0.605041 (Hartree/Particle)

Temperature 298.150 Kelvin. Pressure 1.00000 Atm.

Sum of electronic and thermal Free Energies =

-1543.483430 hartrees (-968551.2871593 kcal/mol)

Coordinates (from last standard orientation):

| Center<br>Number | Atomic<br>Number | Coordinates (Angstroms) |           |          |
|------------------|------------------|-------------------------|-----------|----------|
|                  |                  | X                       | Y         | Z        |
| 1                | 6                | 2.041220                | -0.935269 | 0.625334 |
| 2                | 6                | 0.067504                | 0.502104  | 1.030158 |

|    |    |           |           |           |
|----|----|-----------|-----------|-----------|
| 3  | 6  | 0.750948  | -0.453060 | 0.000269  |
| 4  | 6  | -0.135803 | -1.685884 | -0.349335 |
| 5  | 6  | -1.414101 | 0.121820  | 1.277754  |
| 6  | 6  | -1.510209 | -1.212281 | -0.787403 |
| 7  | 6  | -2.105782 | -0.322719 | 0.017787  |
| 8  | 6  | 0.569639  | -2.523128 | -1.415288 |
| 9  | 6  | -4.641830 | -0.296928 | 2.272065  |
| 10 | 6  | -5.085073 | -2.055385 | -0.198882 |
| 11 | 6  | -6.054649 | 0.887140  | -0.210873 |
| 12 | 6  | -2.133701 | -1.704566 | -2.063614 |
| 13 | 6  | 0.152519  | 1.951696  | 0.589435  |
| 14 | 6  | -0.617986 | 3.528796  | -1.003010 |
| 15 | 6  | 0.629305  | 4.048062  | -1.686226 |
| 16 | 1  | 0.589331  | 0.458197  | 1.988707  |
| 17 | 1  | 0.920782  | 0.076483  | -0.935992 |
| 18 | 1  | -0.214961 | -2.293812 | 0.565518  |
| 19 | 1  | -1.944245 | 0.969677  | 1.721990  |
| 20 | 1  | -1.421965 | -0.689483 | 2.016700  |
| 21 | 1  | -0.013019 | -3.420424 | -1.651183 |
| 22 | 1  | 0.685919  | -1.943293 | -2.337229 |
| 23 | 1  | -5.584140 | -0.647015 | 2.710565  |
| 24 | 1  | -3.847622 | -0.959006 | 2.635574  |
| 25 | 1  | -4.450697 | 0.709875  | 2.659445  |
| 26 | 1  | -4.252300 | -2.722630 | 0.052260  |
| 27 | 1  | -5.985831 | -2.459311 | 0.278667  |
| 28 | 1  | -5.237012 | -2.092262 | -1.282822 |
| 29 | 1  | -7.051898 | 0.597400  | 0.138914  |
| 30 | 1  | -5.854227 | 1.902137  | 0.148506  |
| 31 | 1  | -6.078720 | 0.913661  | -1.305732 |
| 32 | 1  | 1.822569  | -3.530427 | -0.297501 |
| 33 | 1  | -3.066881 | -1.170094 | -2.252990 |
| 34 | 1  | -1.476332 | -1.548344 | -2.926577 |
| 35 | 1  | -2.359862 | -2.777259 | -2.021996 |
| 36 | 1  | -0.878400 | 4.134708  | -0.132392 |
| 37 | 1  | -1.466319 | 3.503186  | -1.688402 |
| 38 | 1  | 0.876771  | 3.443095  | -2.563491 |
| 39 | 1  | 0.452892  | 5.075487  | -2.019544 |
| 40 | 1  | 1.478972  | 4.051663  | -0.998284 |
| 41 | 8  | 2.073637  | -1.615105 | 1.606208  |
| 42 | 8  | -3.312992 | 0.253133  | -0.262110 |
| 43 | 8  | 1.889630  | -2.875909 | -1.014355 |
| 44 | 8  | -0.470879 | 2.156233  | -0.573545 |
| 45 | 8  | 0.688075  | 2.824976  | 1.235980  |
| 46 | 14 | -4.764634 | -0.311974 | 0.402831  |
| 47 | 7  | 3.391972  | -0.414451 | 0.089949  |
| 48 | 6  | 4.439689  | -1.488778 | 0.363629  |

|    |   |          |           |           |
|----|---|----------|-----------|-----------|
| 49 | 1 | 4.242859 | -1.866590 | 1.364411  |
| 50 | 1 | 4.216074 | -2.279203 | -0.356423 |
| 51 | 6 | 3.691192 | 0.867090  | 0.861015  |
| 52 | 1 | 4.608388 | 1.262265  | 0.420036  |
| 53 | 1 | 2.881463 | 1.562232  | 0.630275  |
| 54 | 6 | 3.375230 | -0.141169 | -1.415468 |
| 55 | 1 | 2.734462 | -0.909475 | -1.848354 |
| 56 | 1 | 4.391797 | -0.339042 | -1.753767 |
| 57 | 6 | 5.876554 | -1.015701 | 0.248271  |
| 58 | 1 | 6.508535 | -1.897070 | 0.389959  |
| 59 | 1 | 6.122938 | -0.591586 | -0.728088 |
| 60 | 1 | 6.142677 | -0.294626 | 1.024610  |
| 61 | 6 | 3.827367 | 0.699920  | 2.362583  |
| 62 | 1 | 4.122747 | 1.674689  | 2.760956  |
| 63 | 1 | 2.887142 | 0.417441  | 2.840930  |
| 64 | 1 | 4.597595 | -0.022736 | 2.642115  |
| 65 | 6 | 2.984604 | 1.259648  | -1.861982 |
| 66 | 1 | 3.737482 | 2.000779  | -1.585684 |
| 67 | 1 | 2.929714 | 1.233697  | -2.954536 |
| 68 | 1 | 2.014802 | 1.600735  | -1.493156 |

*DAL with acylammonium ion formed with Hünig's base (exo):*

*Transition state 1 (TS1):*

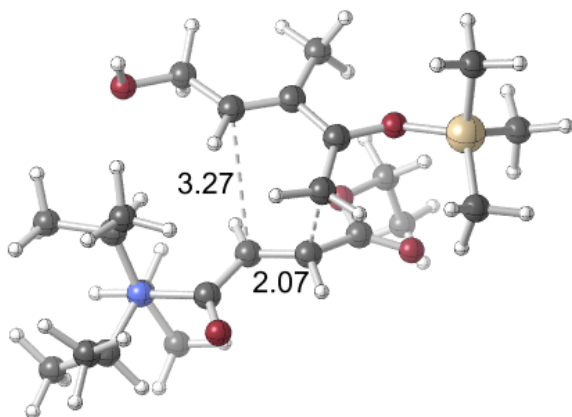

Charge = 1 Multiplicity = 1

HF = -1622.5294681 hartrees (-1018153.46652743 kcal/mol)

Imaginary Frequencies: 1 (-392.9102 1/cm)

Zero-point correction = 0.657089 (Hartree/Particle)

Temperature 298.150 Kelvin. Pressure 1.00000 Atm.

Sum of electronic and thermal Free Energies =

-1621.938567 hartrees (-1017782.67017817 kcal/mol)

Coordinates (from last standard orientation):

| -----  |        |                         |           |           |
|--------|--------|-------------------------|-----------|-----------|
| Center | Atomic | Coordinates (Angstroms) |           |           |
| Number | Number | X                       | Y         | Z         |
| -----  |        |                         |           |           |
| 1      | 6      | 2.070925                | -0.863572 | -0.822509 |
| 2      | 6      | -0.302515               | -1.101660 | -0.598512 |
| 3      | 6      | 0.913038                | -0.765695 | -0.000111 |
| 4      | 6      | -0.131224               | 2.248769  | 0.712005  |
| 5      | 6      | -1.231205               | 0.547180  | -1.425105 |
| 6      | 6      | -1.412735               | 1.830171  | 0.746993  |
| 7      | 6      | -1.967854               | 1.036995  | -0.351844 |
| 8      | 6      | 0.565913                | 2.978978  | 1.830156  |
| 9      | 6      | -4.090080               | -0.777268 | -2.651333 |
| 10     | 6      | -5.329062               | 1.829282  | -1.578706 |
| 11     | 6      | -5.598743               | -0.823974 | 0.025652  |
| 12     | 6      | -2.331193               | 2.081827  | 1.913745  |
| 13     | 6      | -1.454184               | -1.599801 | 0.217317  |
| 14     | 6      | -2.456401               | -1.635126 | 2.356712  |
| 15     | 6      | -2.307871               | -3.088129 | 2.758038  |
| 16     | 1      | -0.256591               | -1.576527 | -1.574922 |
| 17     | 1      | 0.958353                | -0.492733 | 1.044090  |
| 18     | 1      | 0.481056                | 2.067938  | -0.167663 |
| 19     | 1      | -1.767193               | 0.063369  | -2.233420 |
| 20     | 1      | -0.310636               | 1.042164  | -1.710338 |
| 21     | 1      | -0.074059               | 3.771467  | 2.239340  |
| 22     | 1      | 0.772844                | 2.282850  | 2.652947  |
| 23     | 1      | -5.017403               | -1.187905 | -3.071490 |
| 24     | 1      | -3.624786               | -0.164163 | -3.429817 |
| 25     | 1      | -3.432827               | -1.618550 | -2.411098 |
| 26     | 1      | -5.614388               | 2.397431  | -0.686841 |
| 27     | 1      | -4.640628               | 2.445102  | -2.168830 |
| 28     | 1      | -6.231207               | 1.670493  | -2.180734 |
| 29     | 1      | -6.585414               | -1.003625 | -0.416706 |
| 30     | 1      | -5.127604               | -1.795812 | 0.207279  |
| 31     | 1      | -5.747689               | -0.323290 | 0.988230  |
| 32     | 1      | 1.654288                | 4.282905  | 0.877587  |
| 33     | 1      | -2.711514               | 1.137767  | 2.314511  |
| 34     | 1      | -1.826277               | 2.616280  | 2.719267  |
| 35     | 1      | -3.202180               | 2.667590  | 1.600874  |
| 36     | 1      | -3.404456               | -1.444526 | 1.847204  |
| 37     | 1      | -2.375299               | -0.976763 | 3.223141  |
| 38     | 1      | -1.338814               | -3.255545 | 3.237040  |

|    |    |           |           |           |
|----|----|-----------|-----------|-----------|
| 39 | 1  | -3.095028 | -3.348206 | 3.472041  |
| 40 | 1  | -2.396338 | -3.746059 | 1.890511  |
| 41 | 8  | 2.122014  | -1.221117 | -1.979443 |
| 42 | 8  | -3.207702 | 0.625371  | -0.130140 |
| 43 | 8  | 1.820872  | 3.505130  | 1.434562  |
| 44 | 8  | -1.379298 | -1.215556 | 1.491245  |
| 45 | 8  | -2.359773 | -2.258352 | -0.246863 |
| 46 | 14 | -4.549257 | 0.195853  | -1.123850 |
| 47 | 7  | 3.434233  | -0.459866 | -0.158900 |
| 48 | 6  | 3.352136  | 1.073564  | 0.053590  |
| 49 | 1  | 2.557571  | 1.160505  | 0.799471  |
| 50 | 6  | 4.588280  | -0.985585 | -1.051686 |
| 51 | 1  | 4.224499  | -1.969360 | -1.350835 |
| 52 | 6  | 3.522702  | -1.124418 | 1.205546  |
| 53 | 1  | 2.763798  | -0.663112 | 1.835948  |
| 54 | 1  | 4.488517  | -0.854859 | 1.626805  |
| 55 | 6  | 4.615292  | 1.688518  | 0.639477  |
| 56 | 1  | 4.345681  | 2.705555  | 0.939702  |
| 57 | 1  | 4.981946  | 1.171026  | 1.528531  |
| 58 | 1  | 5.418423  | 1.755633  | -0.098680 |
| 59 | 6  | 4.826768  | -0.175350 | -2.322040 |
| 60 | 1  | 5.463090  | -0.789655 | -2.966136 |
| 61 | 1  | 3.911791  | 0.043092  | -2.868652 |
| 62 | 1  | 5.370065  | 0.750912  | -2.115550 |
| 63 | 6  | 3.344446  | -2.632877 | 1.169973  |
| 64 | 1  | 4.105372  | -3.136621 | 0.569340  |
| 65 | 1  | 3.433314  | -3.000910 | 2.195947  |
| 66 | 1  | 2.357339  | -2.917995 | 0.797148  |
| 67 | 6  | 5.915384  | -1.162830 | -0.313263 |
| 68 | 1  | 6.631768  | -1.524668 | -1.056720 |
| 69 | 1  | 6.306926  | -0.226206 | 0.087844  |
| 70 | 1  | 5.884041  | -1.906002 | 0.484858  |
| 71 | 6  | 2.900648  | 1.858298  | -1.177582 |
| 72 | 1  | 2.075089  | 1.386993  | -1.719047 |
| 73 | 1  | 2.547091  | 2.822225  | -0.803711 |
| 74 | 1  | 3.713736  | 2.051314  | -1.876231 |

Intermediate (INT):

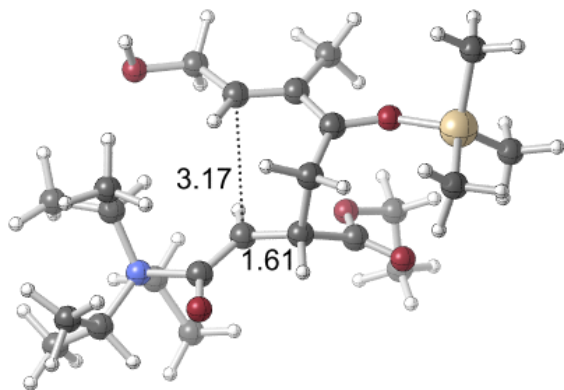

Charge = 1 Multiplicity = 1

HF = -1622.5400487 hartrees (-1018160.10595974 kcal/mol)

Imaginary Frequencies: none found

Zero-point correction = 0.658569 (Hartree/Particle)

Temperature 298.150 Kelvin. Pressure 1.00000 Atm.

Sum of electronic and thermal Free Energies =

-1621.948203 hartrees (-1017788.71686453 kcal/mol)

Coordinates (from last standard orientation):

| Center Number | Atomic Number | Coordinates (Angstroms) |           |           |
|---------------|---------------|-------------------------|-----------|-----------|
|               |               | X                       | Y         | Z         |
| 1             | 6             | 1.991536                | -0.803743 | -0.893953 |
| 2             | 6             | -0.445777               | -0.818014 | -0.818020 |
| 3             | 6             | 0.855891                | -0.525111 | -0.170386 |
| 4             | 6             | -0.155781               | 2.375344  | 0.594836  |
| 5             | 6             | -1.229865               | 0.470077  | -1.389385 |
| 6             | 6             | -1.420756               | 1.909467  | 0.744272  |
| 7             | 6             | -1.995000               | 1.086408  | -0.290224 |
| 8             | 6             | 0.571352                | 3.163500  | 1.645212  |
| 9             | 6             | -4.216050               | -0.627355 | -2.613789 |
| 10            | 6             | -5.613138               | 1.711441  | -1.143091 |
| 11            | 6             | -5.392070               | -1.074183 | 0.210755  |
| 12            | 6             | -2.267928               | 2.159299  | 1.963564  |
| 13            | 6             | -1.435035               | -1.572163 | 0.052404  |
| 14            | 6             | -2.224433               | -1.876115 | 2.267293  |
| 15            | 6             | -1.779851               | -3.289412 | 2.582627  |
| 16            | 1             | -0.277394               | -1.426657 | -1.709745 |
| 17            | 1             | 0.875438                | -0.181614 | 0.852356  |

|    |    |           |           |           |
|----|----|-----------|-----------|-----------|
| 18 | 1  | 0.402612  | 2.191104  | -0.320022 |
| 19 | 1  | -1.909115 | 0.138931  | -2.173172 |
| 20 | 1  | -0.480599 | 1.133505  | -1.817690 |
| 21 | 1  | -0.064485 | 3.981690  | 2.010763  |
| 22 | 1  | 0.764259  | 2.509285  | 2.506011  |
| 23 | 1  | -5.151989 | -1.032031 | -3.020910 |
| 24 | 1  | -3.829974 | 0.093081  | -3.341700 |
| 25 | 1  | -3.512182 | -1.459238 | -2.514320 |
| 26 | 1  | -5.812841 | 2.158240  | -0.163339 |
| 27 | 1  | -5.080188 | 2.448522  | -1.753468 |
| 28 | 1  | -6.575917 | 1.509810  | -1.626188 |
| 29 | 1  | -6.418973 | -1.291570 | -0.106731 |
| 30 | 1  | -4.834393 | -2.015437 | 0.221496  |
| 31 | 1  | -5.437218 | -0.672098 | 1.228279  |
| 32 | 1  | 1.674007  | 4.414379  | 0.641638  |
| 33 | 1  | -2.609732 | 1.209350  | 2.387624  |
| 34 | 1  | -1.715890 | 2.699024  | 2.733784  |
| 35 | 1  | -3.159139 | 2.740823  | 1.706075  |
| 36 | 1  | -3.231388 | -1.850839 | 1.844704  |
| 37 | 1  | -2.192684 | -1.241416 | 3.154323  |
| 38 | 1  | -0.760242 | -3.290143 | 2.978762  |
| 39 | 1  | -2.444970 | -3.721726 | 3.336021  |
| 40 | 1  | -1.814410 | -3.917602 | 1.689040  |
| 41 | 8  | 2.132407  | -1.263465 | -2.026632 |
| 42 | 8  | -3.216213 | 0.734946  | -0.097852 |
| 43 | 8  | 1.825486  | 3.641066  | 1.208967  |
| 44 | 8  | -1.315693 | -1.243878 | 1.342368  |
| 45 | 8  | -2.287207 | -2.320945 | -0.375806 |
| 46 | 14 | -4.633343 | 0.139114  | -0.971896 |
| 47 | 7  | 3.375755  | -0.441794 | -0.137707 |
| 48 | 6  | 3.392718  | 1.090506  | 0.009804  |
| 49 | 1  | 2.567208  | 1.262510  | 0.703827  |
| 50 | 6  | 4.533075  | -1.073798 | -0.932619 |
| 51 | 1  | 4.119638  | -2.039776 | -1.224072 |
| 52 | 6  | 3.338811  | -1.049922 | 1.248364  |
| 53 | 1  | 2.566815  | -0.522466 | 1.807662  |
| 54 | 1  | 4.289587  | -0.827225 | 1.730907  |
| 55 | 6  | 4.657337  | 1.654735  | 0.646051  |
| 56 | 1  | 4.447806  | 2.704582  | 0.874361  |
| 57 | 1  | 4.930325  | 1.162763  | 1.582320  |
| 58 | 1  | 5.509455  | 1.624000  | -0.038053 |
| 59 | 6  | 4.893090  | -0.332138 | -2.216112 |
| 60 | 1  | 5.518274  | -1.007724 | -2.808331 |
| 61 | 1  | 4.017065  | -0.081451 | -2.810098 |
| 62 | 1  | 5.485125  | 0.565915  | -2.016181 |
| 63 | 6  | 3.062689  | -2.544842 | 1.270248  |

|    |   |          |           |           |
|----|---|----------|-----------|-----------|
| 64 | 1 | 3.811544 | -3.126821 | 0.727740  |
| 65 | 1 | 3.081364 | -2.871686 | 2.314157  |
| 66 | 1 | 2.075765 | -2.772781 | 0.861073  |
| 67 | 6 | 5.805827 | -1.310809 | -0.116910 |
| 68 | 1 | 6.541206 | -1.737893 | -0.805696 |
| 69 | 1 | 6.231219 | -0.388849 | 0.284193  |
| 70 | 1 | 5.682891 | -2.025065 | 0.698721  |
| 71 | 6 | 3.061826 | 1.857545  | -1.272845 |
| 72 | 1 | 2.317015 | 1.357594  | -1.896987 |
| 73 | 1 | 2.652791 | 2.821374  | -0.958018 |
| 74 | 1 | 3.947785 | 2.054507  | -1.877557 |

Transition state 2 (TS2):

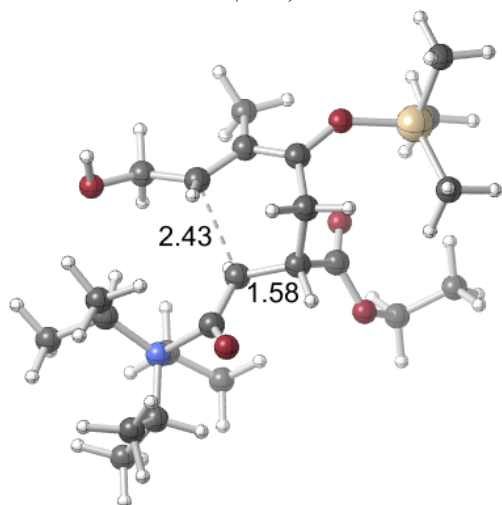

Charge = 1 Multiplicity = 1

HF = -1622.5348488 hartrees (-1018156.84297049 kcal/mol)

Imaginary Frequencies: 1 (-246.7758 1/cm)

Zero-point correction = 0.659204 (Hartree/Particle)

Temperature 298.150 Kelvin. Pressure 1.00000 Atm.

Sum of electronic and thermal Free Energies =

-1621.940719 hartrees (-1017784.02057969 kcal/mol)

Coordinates (from last standard orientation):

| Center Number | Atomic Number | Coordinates (Angstroms) |           |          |
|---------------|---------------|-------------------------|-----------|----------|
|               |               | X                       | Y         | Z        |
| 1             | 6             | -1.919916               | -0.428489 | 0.751683 |
| 2             | 6             | 0.502763                | -0.521075 | 0.776582 |



|    |    |           |           |           |
|----|----|-----------|-----------|-----------|
| 3  | 6  | -0.737982 | -0.059199 | 0.054540  |
| 4  | 6  | -0.147370 | 2.281231  | -0.213429 |
| 5  | 6  | 1.367465  | 0.611615  | 1.459376  |
| 6  | 6  | 1.212569  | 2.139063  | -0.491312 |
| 7  | 6  | 2.007142  | 1.452252  | 0.427120  |
| 8  | 6  | -1.029674 | 2.962974  | -1.229161 |
| 9  | 6  | 4.261709  | -1.051880 | 1.621577  |
| 10 | 6  | 5.930828  | 1.482343  | 1.282919  |
| 11 | 6  | 5.152461  | -0.124114 | -1.225968 |
| 12 | 6  | 1.797051  | 2.532799  | -1.824996 |
| 13 | 6  | 1.331559  | -1.314412 | -0.211903 |
| 14 | 6  | 1.806321  | -3.479489 | -1.042802 |
| 15 | 6  | 3.274278  | -3.684865 | -0.730947 |
| 16 | 1  | 0.205274  | -1.182508 | 1.591207  |
| 17 | 1  | 2.109124  | 0.167324  | 2.122911  |
| 18 | 1  | 0.668835  | 1.189001  | 2.071308  |
| 19 | 1  | -0.431973 | 3.702724  | -1.779591 |
| 20 | 1  | -1.384453 | 2.239935  | -1.974351 |
| 21 | 1  | 5.121341  | -1.733999 | 1.586212  |
| 22 | 1  | 4.156052  | -0.721183 | 2.660936  |
| 23 | 1  | 3.377440  | -1.637255 | 1.354740  |
| 24 | 1  | 6.151261  | 2.353688  | 0.657070  |
| 25 | 1  | 5.603765  | 1.841762  | 2.264477  |
| 26 | 1  | 6.865977  | 0.927758  | 1.422995  |
| 27 | 1  | 4.322504  | -0.592111 | -1.762375 |
| 28 | 1  | 5.490747  | 0.745646  | -1.800330 |
| 29 | 1  | 5.983547  | -0.837871 | -1.180841 |
| 30 | 1  | -1.875188 | 4.313920  | -0.117817 |
| 31 | 1  | 2.791533  | 2.100779  | -1.946735 |
| 32 | 1  | 1.168491  | 2.164656  | -2.642798 |
| 33 | 1  | 1.880302  | 3.620242  | -1.935074 |
| 34 | 1  | 1.663140  | -3.038593 | -2.032212 |
| 35 | 1  | 1.252058  | -4.417406 | -0.983544 |
| 36 | 1  | 3.403364  | -4.090941 | 0.276736  |
| 37 | 1  | 3.697734  | -4.397310 | -1.445495 |
| 38 | 1  | 3.827399  | -2.745195 | -0.811859 |
| 39 | 8  | -2.002425 | -0.739881 | 1.926169  |
| 40 | 8  | 3.309134  | 1.456781  | 0.272294  |
| 41 | 8  | -2.172338 | 3.574265  | -0.672500 |
| 42 | 8  | 1.167672  | -2.629333 | -0.063237 |
| 43 | 8  | 2.017258  | -0.812580 | -1.079189 |
| 44 | 14 | 4.643694  | 0.390954  | 0.491736  |
| 45 | 7  | -3.292192 | -0.424790 | -0.027706 |
| 46 | 6  | -3.742437 | 1.054167  | -0.071896 |
| 47 | 1  | -2.984616 | 1.498510  | -0.717461 |
| 48 | 6  | -4.252876 | -1.426708 | 0.671035  |

|    |   |           |           |           |
|----|---|-----------|-----------|-----------|
| 49 | 1 | -3.590539 | -2.261574 | 0.907136  |
| 50 | 6 | -3.054532 | -0.890974 | -1.452148 |
| 51 | 1 | -2.435664 | -0.131241 | -1.930211 |
| 52 | 1 | -4.016761 | -0.876334 | -1.960145 |
| 53 | 6 | -5.104041 | 1.276551  | -0.718705 |
| 54 | 1 | -5.198009 | 2.355665  | -0.876055 |
| 55 | 1 | -5.215194 | 0.796287  | -1.693094 |
| 56 | 1 | -5.924676 | 0.966006  | -0.067193 |
| 57 | 6 | -4.871986 | -0.934620 | 1.977574  |
| 58 | 1 | -5.304227 | -1.815543 | 2.462679  |
| 59 | 1 | -4.145385 | -0.499430 | 2.658102  |
| 60 | 1 | -5.690485 | -0.231411 | 1.799567  |
| 61 | 6 | -2.411349 | -2.265462 | -1.563875 |
| 62 | 1 | -3.048495 | -3.063438 | -1.176966 |
| 63 | 1 | -2.240023 | -2.464248 | -2.625977 |
| 64 | 1 | -1.447410 | -2.317625 | -1.051833 |
| 65 | 6 | -5.378648 | -1.936118 | -0.232857 |
| 66 | 1 | -5.971168 | -2.625221 | 0.376173  |
| 67 | 1 | -6.046922 | -1.137752 | -0.560729 |
| 68 | 1 | -5.040177 | -2.495038 | -1.105422 |
| 69 | 6 | -3.672637 | 1.787934  | 1.265720  |
| 70 | 1 | -2.747624 | 1.603036  | 1.815539  |
| 71 | 1 | -3.705530 | 2.851810  | 1.024411  |
| 72 | 1 | -4.519118 | 1.560836  | 1.912707  |
| 73 | 1 | -0.719956 | -0.069810 | -1.026080 |
| 74 | 1 | -0.501252 | 2.308472  | 0.811861  |

*Product:*

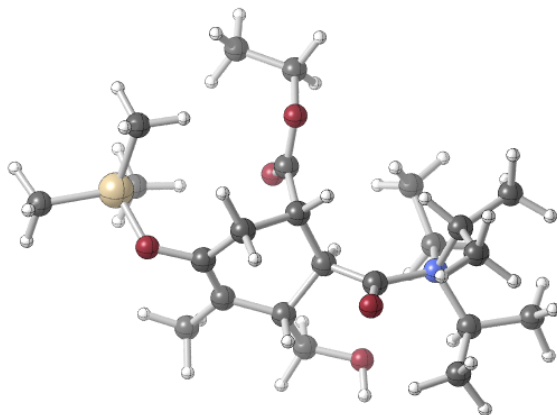

Charge = 1 Multiplicity = 1

HF = -1622.5949757 hartrees (-1018194.57320151 kcal/mol)

Imaginary Frequencies: none found

Zero-point correction = 0.665393 (Hartree/Particle)

Temperature 298.150 Kelvin. Pressure 1.00000 Atm.

Sum of electronic and thermal Free Energies =

-1621.991535 hartrees (-1017815.90812785 kcal/mol)

Coordinates (from last standard orientation):

| Center<br>Number | Atomic<br>Number | Coordinates (Angstroms) |           |           |
|------------------|------------------|-------------------------|-----------|-----------|
|                  |                  | X                       | Y         | Z         |
| 1                | 6                | 1.984044                | -0.561117 | 0.544298  |
| 2                | 6                | -0.274609               | 0.453504  | 0.683287  |
| 3                | 6                | 0.622400                | -0.528017 | -0.129525 |
| 4                | 6                | 0.069710                | -1.986779 | -0.189379 |
| 5                | 6                | -1.302746               | -0.305616 | 1.549604  |
| 6                | 6                | -1.444441               | -2.064275 | -0.171052 |
| 7                | 6                | -2.079700               | -1.292355 | 0.718172  |
| 8                | 6                | 0.702931                | -2.651258 | -1.407337 |
| 9                | 6                | -4.488082               | 1.281647  | 1.248826  |
| 10               | 6                | -6.216100               | -1.229734 | 0.885678  |
| 11               | 6                | -4.465435               | -0.227750 | -1.459378 |
| 12               | 6                | -2.152438               | -3.072911 | -1.030903 |
| 13               | 6                | -0.968099               | 1.400030  | -0.287273 |
| 14               | 6                | -1.534891               | 3.663802  | -0.683197 |
| 15               | 6                | -3.042022               | 3.708701  | -0.814862 |
| 16               | 1                | 0.327423                | 1.074980  | 1.352671  |
| 17               | 1                | -1.976783               | 0.402834  | 2.038963  |
| 18               | 1                | -0.747820               | -0.823275 | 2.343102  |
| 19               | 1                | 0.427101                | -3.707537 | -1.478689 |
| 20               | 1                | 0.376643                | -2.149157 | -2.324989 |
| 21               | 1                | -5.267048               | 1.964548  | 0.888800  |
| 22               | 1                | -4.618312               | 1.169457  | 2.331645  |
| 23               | 1                | -3.520923               | 1.763826  | 1.074463  |
| 24               | 1                | -6.314143               | -2.202418 | 0.391398  |
| 25               | 1                | -6.257584               | -1.395218 | 1.967881  |
| 26               | 1                | -7.084858               | -0.622623 | 0.606564  |
| 27               | 1                | -3.463253               | 0.109250  | -1.746729 |
| 28               | 1                | -4.655798               | -1.188781 | -1.950973 |
| 29               | 1                | -5.191366               | 0.494615  | -1.851656 |
| 30               | 1                | 2.478292                | -3.271934 | -0.859593 |
| 31               | 1                | -3.223596               | -3.069114 | -0.818947 |
| 32               | 1                | -2.013825               | -2.861480 | -2.098429 |
| 33               | 1                | -1.777492               | -4.088231 | -0.851839 |
| 34               | 1                | -1.056317               | 3.499123  | -1.652202 |
| 35               | 1                | -1.147825               | 4.585484  | -0.245971 |

|    |    |           |           |           |
|----|----|-----------|-----------|-----------|
| 36 | 1  | -3.513376 | 3.911331  | 0.150325  |
| 37 | 1  | -3.312082 | 4.514684  | -1.504386 |
| 38 | 1  | -3.430365 | 2.767628  | -1.214584 |
| 39 | 8  | 2.128934  | -1.046821 | 1.624950  |
| 40 | 8  | -3.416097 | -1.408713 | 0.976923  |
| 41 | 8  | 2.121204  | -2.509306 | -1.343325 |
| 42 | 8  | -1.083581 | 2.629407  | 0.223170  |
| 43 | 8  | -1.334059 | 1.096005  | -1.400996 |
| 44 | 14 | -4.627851 | -0.381365 | 0.396998  |
| 45 | 7  | 3.224408  | 0.149876  | -0.065870 |
| 46 | 6  | 4.391139  | -0.883688 | -0.283357 |
| 47 | 1  | 4.080047  | -1.366189 | -1.210413 |
| 48 | 6  | 3.529305  | 1.331211  | 0.922255  |
| 49 | 1  | 2.529911  | 1.728532  | 1.119192  |
| 50 | 6  | 2.908389  | 0.672866  | -1.464459 |
| 51 | 1  | 2.539033  | -0.199466 | -2.005221 |
| 52 | 1  | 3.868541  | 0.932218  | -1.903420 |
| 53 | 6  | 5.739690  | -0.209157 | -0.524655 |
| 54 | 1  | 6.396288  | -0.983234 | -0.932341 |
| 55 | 1  | 5.713179  | 0.602040  | -1.254157 |
| 56 | 1  | 6.196919  | 0.153438  | 0.398126  |
| 57 | 6  | 4.138437  | 0.919710  | 2.258692  |
| 58 | 1  | 4.170520  | 1.830806  | 2.864418  |
| 59 | 1  | 3.553982  | 0.178739  | 2.798909  |
| 60 | 1  | 5.166590  | 0.568507  | 2.152330  |
| 61 | 6  | 1.942243  | 1.860772  | -1.572353 |
| 62 | 1  | 2.450327  | 2.730817  | -1.992542 |
| 63 | 1  | 1.113307  | 1.609555  | -2.237805 |
| 64 | 1  | 1.514652  | 2.175995  | -0.616133 |
| 65 | 6  | 4.375902  | 2.454003  | 0.319051  |
| 66 | 1  | 4.183962  | 3.340401  | 0.931297  |
| 67 | 1  | 5.442973  | 2.236623  | 0.383097  |
| 68 | 1  | 4.131561  | 2.716866  | -0.708889 |
| 69 | 6  | 4.540182  | -1.973803 | 0.773942  |
| 70 | 1  | 3.667706  | -2.620515 | 0.852387  |
| 71 | 1  | 5.381912  | -2.590663 | 0.443528  |
| 72 | 1  | 4.778570  | -1.587042 | 1.765023  |
| 73 | 1  | 0.672911  | -0.177418 | -1.156355 |
| 74 | 1  | 0.443419  | -2.511341 | 0.703035  |

*Energies of transition state structures (TSSs) and intermediates (INTs) along the Diels–Alder pathway for chiral and achiral dienophiles:*

Calculations of the Diels-Alder step between chiral (BTM-derived) and achiral (Brønsted base-derived) dienophiles showed that only the BTM-bound acylammonium dienophile is likely to undergo cycloaddition (**Table S3**). While several barriers with achiral dienophiles look low enough to appear viable (**Table S3b**), only the Diels-Alder reaction with chiral (BTM) dienophile is not preceded by a significant endergonic step (overall barriers shown in **Table S3a**).

All achiral dienophiles may undergo a step-wise Diels-Alder reaction, assuming that the final step is exergonic. If the last step is not exergonic, however, the cycloaddition would likely be reversible. This would mean that formation of the acylammonium ion would control which species (chiral or achiral dienophile) would undergo the Diels-Alder step. As discussed above, all formation of acylammonium salts derived from Brønsted bases are endergonic and have barriers too high to compete with BTM. We conclude then that the Brønsted base does not effectively compete with BTM in the acylammonium formation step nor the Diels-Alder step of this organocascade.

**Table 1.** Comparison of energy barriers ( $\Delta G$ ) for the DA cycloaddition between BTM-derived and achiral Lewis base-derived,  $\alpha,\beta$ -unsaturated acylammonium salt and siloxy diene.<sup>a</sup>

**a.** Energies relative to separated reactants.

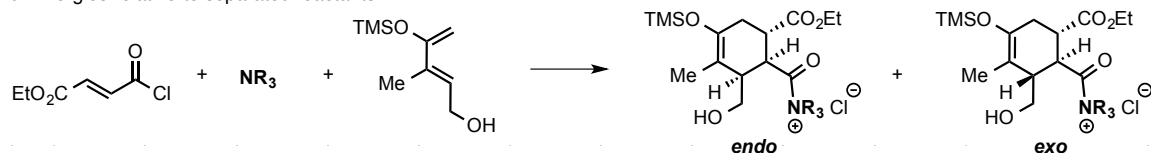

|            | BTM         |            | Pyridine    |            | 2,6-Lutidine |             | DTBP        |            | Triethylamine |             | Hünig's base |            |
|------------|-------------|------------|-------------|------------|--------------|-------------|-------------|------------|---------------|-------------|--------------|------------|
|            | <i>endo</i> | <i>exo</i> | <i>endo</i> | <i>exo</i> | <i>endo</i>  | <i>exo</i>  | <i>endo</i> | <i>exo</i> | <i>endo</i>   | <i>exo</i>  | <i>endo</i>  | <i>exo</i> |
| <b>TS</b>  | 10.7        | 12.0       | 24.9, 17.2  | 25.3       | 31.0, 25.7   | 31.1, –     | 53.9, 44.0  | 50.8, 44.6 | 25.1, 24.0    | 28.1, 22.3  | –            | 34.6, 33.2 |
| <b>MIN</b> | –30.7       | –35.7      | 15.6, –16.4 | –0.34      | 38.0, –9.6   | 23.4, –12.0 | 40.9, 14.8  | 41.7, 7.6  | 21.8, –11.9   | 21.1, –14.9 | –            | 28.5, –    |

**b.** Energies relative to preformed acylammonium salt.

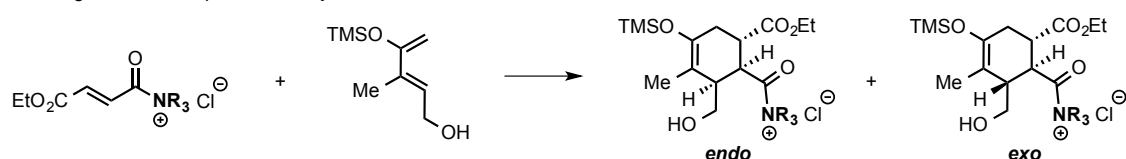

|            | BTM         |            | Pyridine    |            | 2,6-Lutidine |             | DTBP        |            | Triethylamine |             | Hünig's base |            |
|------------|-------------|------------|-------------|------------|--------------|-------------|-------------|------------|---------------|-------------|--------------|------------|
|            | <i>endo</i> | <i>exo</i> | <i>endo</i> | <i>exo</i> | <i>endo</i>  | <i>exo</i>  | <i>endo</i> | <i>exo</i> | <i>endo</i>   | <i>exo</i>  | <i>endo</i>  | <i>exo</i> |
| <b>TS</b>  | 16.6        | 17.8       | 12.5, 4.8   | 13.2       | 18.4, 13.2   | 18.6, –     | 21.8, 12.0  | 18.7, 12.5 | 17.6, 16.5    | 20.6, 14.7  | –            | 17.0, 15.7 |
| <b>MIN</b> | –24.9       | –29.9      | 3.2, –28.8  | –12.7      | 25.5, –22.2  | 10.9, –24.5 | 8.8, –17.2  | 9.7, –24.4 | 14.3, –19.4   | 13.5, –22.4 | –            | 11.0, –    |

<sup>a</sup>Energies computed with SMD(DCM)-M06-2X/6-31G(d) and shown in kcal/mol relative to separated reactants.

## b. Diels-Alder step of the DAL organocascade

### ii. Modeling explicit base

Once we confirmed that Brønsted bases were not competing with the BTM catalyst in acylammonium formation or the Diels-Alder step, we sought another explanation for its effect on yield and selectivity of the DAL organocascade. We postulated that the base could be involved in non-covalent interactions in the Diels-Alder TSS, helping to stabilize one TSS over another. Manual conformational searching of the *endo* and *exo* TSSs with an explicit 2,6-lutidine Brønsted base was carried out to consider this role of the base. We reasoned that the base could hydrogen bond with the terminal alcohol of the diene and exhibit  $\pi$ -stacking interactions with the BTM catalyst. Multiple orientations of the base (displaced, stacked, T-shaped) were considered during the manual conformational search. We chose the lowest energy conformations and orientations of the *endo* and *exo* TSSs found to compare and present here. As expected, the base did indeed exhibit non-covalent interactions with the adduct. We found that it stabilized the *exo* TSS further than the *endo* TSS, leading to a lowering of the energy barrier and a  $\Delta\Delta G$  of nearly zero. The computational results supported our hypothesis that the base indeed played a role in the TSS of the Diels-Alder step of the DAL organocascade. Though these results were promising and exciting, it led us to question the origin of diastereoselectivity, discussed in the following section.

*Diene:*

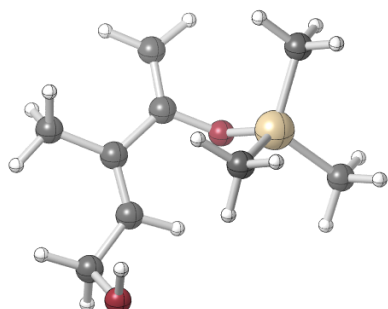

Charge = 0 Multiplicity = 1

HF = -793.4977666 hartrees (-497927.783519166 kcal/mol)

Imaginary Frequencies: none found

Zero-point correction = 0.255956 (Hartree/Particle)

Temperature 298.150 Kelvin. Pressure 1.00000 Atm.

Sum of electronic and thermal Free Energies =

-793.286374 hartrees (-497795.13254874 kcal/mol)

Coordinates (from last standard orientation):

| Center<br>Number | Atomic<br>Number | Coordinates (Angstroms) |           |           |
|------------------|------------------|-------------------------|-----------|-----------|
|                  |                  | X                       | Y         | Z         |
| 1                | 6                | -1.789481               | -0.288014 | -0.572437 |
| 2                | 6                | 0.380319                | 2.656051  | -0.177700 |
| 3                | 6                | -3.090830               | -0.997507 | -0.350989 |
| 4                | 6                | -0.048458               | 1.411338  | -0.423352 |
| 5                | 6                | 0.791570                | -1.302206 | 1.391004  |
| 6                | 6                | 3.117543                | 0.624855  | 0.841751  |
| 7                | 6                | 2.564231                | -1.710651 | -1.107445 |
| 8                | 6                | -1.445877               | 0.955064  | -0.200382 |
| 9                | 6                | -2.378693               | 1.946485  | 0.443736  |
| 10               | 1                | -1.034051               | -0.907485 | -1.051103 |
| 11               | 1                | 1.413073                | 2.925175  | -0.374643 |
| 12               | 1                | -0.283560               | 3.425212  | 0.196776  |
| 13               | 1                | -3.831018               | -0.372046 | 0.161086  |
| 14               | 1                | -3.524191               | -1.299905 | -1.310550 |
| 15               | 1                | 0.046637                | -1.982972 | 0.964440  |
| 16               | 1                | 1.448027                | -1.888470 | 2.045693  |
| 17               | 1                | 0.266990                | -0.572411 | 2.018642  |
| 18               | 1                | 3.697007                | 1.161466  | 0.082416  |
| 19               | 1                | 2.678684                | 1.363738  | 1.521178  |
| 20               | 1                | 3.816673                | 0.014203  | 1.425967  |
| 21               | 1                | 3.238273                | -2.390030 | -0.573475 |
| 22               | 1                | 1.786506                | -2.316488 | -1.585546 |
| 23               | 1                | 3.140843                | -1.217469 | -1.897471 |
| 24               | 1                | -2.480754               | -1.965170 | 1.218249  |
| 25               | 1                | -1.969850               | 2.302424  | 1.395567  |
| 26               | 1                | -2.512158               | 2.823853  | -0.199200 |
| 27               | 1                | -3.365079               | 1.520991  | 0.631188  |
| 28               | 8                | 0.810376                | 0.473233  | -0.934987 |
| 29               | 8                | -2.871154               | -2.210857 | 0.364149  |
| 30               | 14               | 1.810874                | -0.464008 | 0.059455  |



*Ethyl fumaroyl chloride (5):*

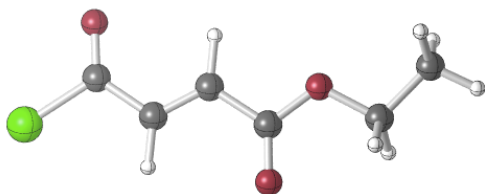

Charge = 0 Multiplicity = 1

HF = -918.5039922 hartrees (-576370.440145422 kcal/mol)

Imaginary Frequencies: none found

Zero-point correction = 0.126267 (Hartree/Particle)

Temperature 298.150 Kelvin. Pressure 1.00000 Atm.

Sum of electronic and thermal Free Energies =

-918.416338 hartrees (-576315.43625838 kcal/mol)

Coordinates (from last standard orientation):

| Center<br>Number | Atomic<br>Number | Coordinates (Angstroms) |           |           |
|------------------|------------------|-------------------------|-----------|-----------|
|                  |                  | X                       | Y         | Z         |
| 1                | 6                | -2.404785               | 0.535097  | -0.020979 |
| 2                | 6                | 0.008958                | 0.346013  | -0.031898 |
| 3                | 6                | -1.169862               | -0.277188 | -0.025157 |
| 4                | 6                | 1.268965                | -0.453229 | -0.032192 |
| 5                | 6                | 3.616705                | -0.317867 | -0.008249 |
| 6                | 6                | 4.675205                | 0.755901  | 0.080148  |
| 7                | 1                | 0.088461                | 1.428999  | -0.034584 |
| 8                | 1                | -1.250380               | -1.358672 | -0.017684 |
| 9                | 1                | 3.699592                | -0.904604 | -0.927911 |
| 10               | 1                | 3.655164                | -1.005150 | 0.841606  |
| 11               | 1                | 4.570953                | 1.326879  | 1.006880  |
| 12               | 1                | 5.665622                | 0.292605  | 0.068215  |
| 13               | 1                | 4.604344                | 1.443500  | -0.767095 |
| 14               | 8                | -2.491100               | 1.719758  | -0.059931 |
| 15               | 8                | 2.334266                | 0.343047  | -0.005009 |
| 16               | 8                | 1.311464                | -1.661878 | -0.054280 |
| 17               | 17               | -3.896583               | -0.468432 | 0.059665  |

(S)-(-)-BTM catalyst:

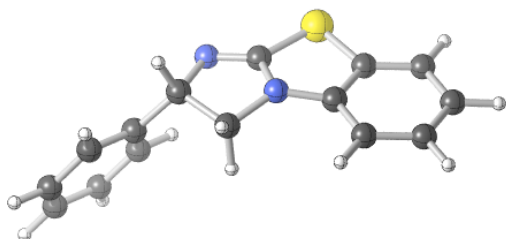

Charge = 0 Multiplicity = 1

HF = -1086.2217193 hartrees (-681614.991077943 kcal/mol)

Imaginary Frequencies: none found

Zero-point correction = 0.238948 (Hartree/Particle)

Temperature 298.150 Kelvin. Pressure 1.00000 Atm.

Sum of electronic and thermal Free Energies =

-1086.024409 hartrees (-681491.17689159 kcal/mol)

Coordinates (from last standard orientation):

| Center<br>Number | Atomic<br>Number | Coordinates (Angstroms) |           |           |
|------------------|------------------|-------------------------|-----------|-----------|
|                  |                  | X                       | Y         | Z         |
| 1                | 6                | -2.658926               | -1.872440 | 0.032577  |
| 2                | 6                | -2.123816               | -0.600345 | -0.141211 |
| 3                | 6                | -2.895105               | 0.543447  | 0.132450  |
| 4                | 6                | -4.207606               | 0.432725  | 0.561787  |
| 5                | 6                | -4.746737               | -0.845244 | 0.732328  |
| 6                | 6                | -3.978352               | -1.979555 | 0.473061  |
| 7                | 1                | -2.058599               | -2.752062 | -0.178240 |
| 8                | 1                | -4.800047               | 1.317910  | 0.772337  |
| 9                | 1                | -5.771715               | -0.949580 | 1.072628  |
| 10               | 1                | -4.410212               | -2.965542 | 0.613459  |
| 11               | 6                | -0.539268               | 1.070167  | -0.533267 |
| 12               | 16               | -1.966889               | 2.036351  | -0.147291 |
| 13               | 7                | -0.860156               | -0.271737 | -0.595974 |
| 14               | 6                | 0.395774                | -1.012047 | -0.630557 |
| 15               | 6                | 1.379397                | 0.139158  | -1.027978 |
| 16               | 7                | 0.675758                | 1.406318  | -0.721608 |
| 17               | 6                | 2.713946                | 0.013122  | -0.330895 |
| 18               | 6                | 3.702254                | -0.807909 | -0.878940 |
| 19               | 6                | 2.957188                | 0.651293  | 0.886801  |
| 20               | 6                | 4.914045                | -0.995064 | -0.218440 |
| 21               | 1                | 3.520707                | -1.300931 | -1.831631 |

|    |   |          |           |           |
|----|---|----------|-----------|-----------|
| 22 | 6 | 4.171891 | 0.470832  | 1.545054  |
| 23 | 1 | 2.193991 | 1.298559  | 1.309570  |
| 24 | 6 | 5.151970 | -0.354415 | 0.996466  |
| 25 | 1 | 5.674328 | -1.635977 | -0.655503 |
| 26 | 1 | 4.353595 | 0.977589  | 2.488602  |
| 27 | 1 | 6.098468 | -0.494531 | 1.510257  |
| 28 | 1 | 0.621577 | -1.422838 | 0.361589  |
| 29 | 1 | 0.374413 | -1.817883 | -1.366373 |
| 30 | 1 | 1.544570 | 0.099252  | -2.112384 |

*2,6-lutidine/2,6-dimethylpyridine (DMP):*

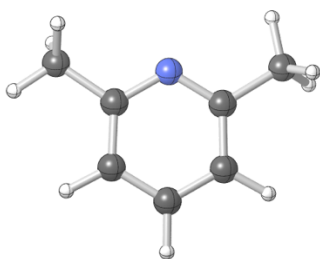

Charge = 0 Multiplicity = 1

HF = -326.7824947 hartrees (-205059.283249197 kcal/mol)

Imaginary Frequencies: none found

Zero-point correction = 0.145307 (Hartree/Particle)

Temperature 298.150 Kelvin. Pressure 1.00000 Atm.

Sum of electronic and thermal Free Energies =

-326.669833 hartrees (-204988.58690583 kcal/mol)

Coordinates (from last standard orientation):

| Center<br>Number | Atomic<br>Number | Coordinates (Angstroms) |           |           |
|------------------|------------------|-------------------------|-----------|-----------|
|                  |                  | X                       | Y         | Z         |
| 1                | 6                | -1.160473               | -0.261946 | -0.004035 |
| 2                | 6                | -1.195166               | 1.131299  | -0.003236 |
| 3                | 6                | 0.008859                | 1.831739  | 0.000842  |
| 4                | 6                | 1.199720                | 1.121255  | 0.003073  |
| 5                | 6                | 1.149738                | -0.278042 | 0.001039  |
| 6                | 7                | -0.006143               | -0.949731 | -0.002114 |
| 7                | 1                | 0.013558                | 2.918072  | 0.001370  |
| 8                | 1                | -2.147267               | 1.652127  | -0.005575 |
| 9                | 1                | 2.159615                | 1.628875  | 0.005136  |

|    |   |           |           |           |
|----|---|-----------|-----------|-----------|
| 10 | 6 | 2.418847  | -1.088539 | -0.000521 |
| 11 | 1 | 3.018921  | -0.873332 | -0.891088 |
| 12 | 1 | 3.035787  | -0.852185 | 0.872816  |
| 13 | 1 | 2.182057  | -2.154074 | 0.013626  |
| 14 | 6 | -2.421617 | -1.082545 | 0.002318  |
| 15 | 1 | -2.405224 | -1.812259 | -0.812977 |
| 16 | 1 | -2.505201 | -1.644612 | 0.938663  |
| 17 | 1 | -3.308700 | -0.453813 | -0.104057 |

*Chloride anion (Cl<sup>-</sup>):*

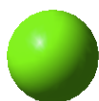

Charge = -1 Multiplicity = 1

HF = -460.31703 hartrees (-288853.5394953 kcal/mol)

Imaginary Frequencies: none found

Zero-point correction = 0.000000 (Hartree/Particle)

Temperature 298.150 Kelvin. Pressure 1.00000 Atm.

Sum of electronic and thermal Free Energies =

-460.332053 hartrees (-288862.96657803 kcal/mol)

Coordinates (from last standard orientation):

atom 1 is isolated, type=Cl

| Center<br>Number | Atomic<br>Number | Coordinates (Angstroms) |          |          |
|------------------|------------------|-------------------------|----------|----------|
|                  |                  | X                       | Y        | Z        |
| 1                | 17               | 0.000000                | 0.000000 | 0.000000 |

*Diels-Alder TSS with explicit DMP (endo)*

Reactant:

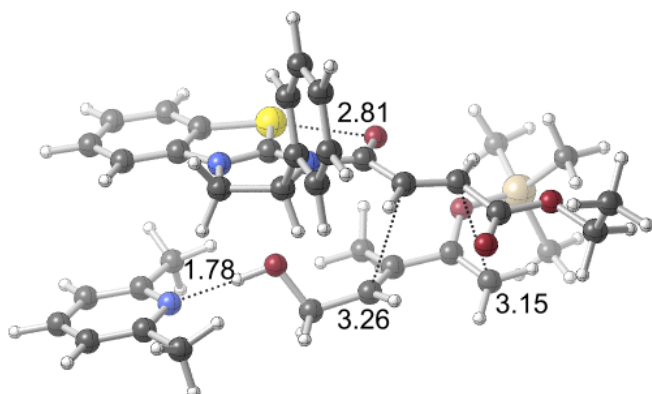

Charge = 1 Multiplicity = 1

HF = -2664.7483368 hartrees (-1672156.22882537 kcal/mol)

Imaginary Frequencies: none found

Zero-point correction = 0.774735 (Hartree/Particle)

Temperature 298.150 Kelvin. Pressure 1.00000 Atm.

Sum of electronic and thermal Free Energies =

-2664.060647 hartrees (-1671724.69659897 kcal/mol)

Coordinates (from last standard orientation):

| Center Number | Atomic Number | Coordinates (Angstroms) |           |           |
|---------------|---------------|-------------------------|-----------|-----------|
|               |               | X                       | Y         | Z         |
| 1             | 6             | -4.947260               | 0.060299  | -1.422320 |
| 2             | 6             | -3.586680               | -0.164400 | -1.605819 |
| 3             | 6             | -3.109991               | -1.243207 | -2.361758 |
| 4             | 6             | -3.992806               | -2.123804 | -2.977426 |
| 5             | 6             | -5.355397               | -1.897877 | -2.807393 |
| 6             | 6             | -5.824306               | -0.825721 | -2.036172 |
| 7             | 6             | -1.330564               | 0.129195  | -1.421847 |
| 8             | 6             | -2.457314               | 1.794633  | -0.284553 |
| 9             | 6             | -0.919825               | 2.028908  | -0.150059 |
| 10            | 6             | -0.465132               | 3.361917  | -0.696935 |
| 11            | 6             | 0.039119                | 4.331329  | 0.168459  |
| 12            | 6             | -0.571394               | 3.637241  | -2.063182 |
| 13            | 6             | 0.432878                | 5.573618  | -0.326324 |
| 14            | 6             | -0.175036               | 4.875541  | -2.556565 |
| 15            | 6             | 0.326637                | 5.845723  | -1.687482 |

|    |   |           |           |           |
|----|---|-----------|-----------|-----------|
| 16 | 6 | 0.993747  | 0.476582  | -1.003812 |
| 17 | 6 | 1.957214  | 1.243614  | -0.191690 |
| 18 | 6 | 3.249659  | 0.915440  | -0.216379 |
| 19 | 6 | 0.886025  | -0.835053 | 2.084584  |
| 20 | 6 | 3.829491  | -1.314144 | 1.935374  |
| 21 | 6 | -0.575120 | -0.799816 | 2.452895  |
| 22 | 6 | 2.914736  | -1.821636 | 1.093150  |
| 23 | 6 | 5.333687  | -4.185581 | 0.860215  |
| 24 | 6 | 5.900460  | -1.851002 | -1.110445 |
| 25 | 6 | 4.164716  | -4.234075 | -1.988652 |
| 26 | 6 | 1.449685  | -1.809173 | 1.351893  |
| 27 | 6 | 4.192514  | 1.602023  | 0.710872  |
| 28 | 6 | 6.462074  | 1.801613  | 1.334876  |
| 29 | 6 | 6.831350  | 3.207764  | 0.910240  |
| 30 | 6 | 0.666844  | -2.924729 | 0.714975  |
| 31 | 1 | -5.296954 | 0.894473  | -0.821595 |
| 32 | 1 | -3.632040 | -2.958268 | -3.570012 |
| 33 | 1 | -6.065753 | -2.569009 | -3.278697 |
| 34 | 1 | -6.892900 | -0.681209 | -1.914353 |
| 35 | 1 | -2.953617 | 2.615626  | -0.806061 |
| 36 | 1 | -2.936882 | 1.612419  | 0.677744  |
| 37 | 1 | 0.127580  | 4.111425  | 1.229950  |
| 38 | 1 | -0.959557 | 2.877791  | -2.739351 |
| 39 | 1 | 0.827453  | 6.323219  | 0.352475  |
| 40 | 1 | -0.254599 | 5.084811  | -3.618912 |
| 41 | 1 | 0.639298  | 6.810862  | -2.074220 |
| 42 | 1 | -0.620457 | 1.903942  | 0.892447  |
| 43 | 1 | 1.603692  | 2.028525  | 0.468943  |
| 44 | 1 | 1.511533  | -0.019402 | 2.444135  |
| 45 | 1 | 4.888507  | -1.307827 | 1.696544  |
| 46 | 1 | 3.527926  | -0.905887 | 2.892577  |
| 47 | 1 | 3.634792  | 0.134460  | -0.866123 |
| 48 | 1 | -0.885414 | -1.776225 | 2.853259  |
| 49 | 1 | -0.726673 | -0.062125 | 3.253164  |
| 50 | 1 | 5.811000  | -3.592502 | 1.645908  |
| 51 | 1 | 4.528214  | -4.768965 | 1.321300  |
| 52 | 1 | 6.077888  | -4.895259 | 0.479504  |
| 53 | 1 | 5.533928  | -1.326966 | -2.000922 |
| 54 | 1 | 6.096484  | -1.100158 | -0.337915 |
| 55 | 1 | 6.855909  | -2.320108 | -1.375469 |
| 56 | 1 | 3.454270  | -5.003082 | -1.665674 |
| 57 | 1 | 3.685403  | -3.641853 | -2.775929 |
| 58 | 1 | 5.031509  | -4.739338 | -2.429494 |
| 59 | 1 | 7.307544  | 1.118584  | 1.238578  |
| 60 | 1 | 6.091533  | 1.772982  | 2.362592  |
| 61 | 1 | 7.641329  | 3.578984  | 1.545230  |

|    |    |           |           |           |
|----|----|-----------|-----------|-----------|
| 62 | 1  | 7.174323  | 3.216906  | -0.128087 |
| 63 | 1  | 5.977036  | 3.882124  | 1.009498  |
| 64 | 1  | 0.764994  | -2.859174 | -0.373775 |
| 65 | 1  | 1.062790  | -3.902839 | 1.012719  |
| 66 | 1  | -0.393333 | -2.873093 | 0.968451  |
| 67 | 8  | 1.268887  | -0.483574 | -1.697451 |
| 68 | 8  | 3.223460  | -2.410573 | -0.090604 |
| 69 | 8  | 3.850370  | 2.372254  | 1.580765  |
| 70 | 8  | 5.453613  | 1.244604  | 0.466189  |
| 71 | 8  | -1.362533 | -0.469295 | 1.315466  |
| 72 | 7  | -2.527208 | 0.581881  | -1.101003 |
| 73 | 7  | -0.342812 | 0.891461  | -0.928501 |
| 74 | 16 | -1.338429 | -1.287837 | -2.387702 |
| 75 | 14 | 4.675305  | -3.151565 | -0.555452 |
| 76 | 1  | -2.310963 | -0.525702 | 1.602683  |
| 77 | 6  | -4.582226 | 0.388883  | 2.821385  |
| 78 | 6  | -5.961605 | 0.458491  | 3.009611  |
| 79 | 6  | -6.768708 | -0.508718 | 2.418785  |
| 80 | 6  | -6.181049 | -1.516053 | 1.663611  |
| 81 | 6  | -4.793243 | -1.521733 | 1.512288  |
| 82 | 7  | -4.025035 | -0.578174 | 2.074900  |
| 83 | 1  | -7.846614 | -0.476149 | 2.547797  |
| 84 | 1  | -6.386813 | 1.256498  | 3.610069  |
| 85 | 1  | -6.778218 | -2.287997 | 1.188080  |
| 86 | 6  | -4.091604 | -2.592533 | 0.724723  |
| 87 | 1  | -4.006291 | -3.508077 | 1.321898  |
| 88 | 1  | -4.646370 | -2.841597 | -0.184814 |
| 89 | 1  | -3.081968 | -2.268113 | 0.456957  |
| 90 | 6  | -3.645213 | 1.367974  | 3.474078  |
| 91 | 1  | -3.399154 | 1.032516  | 4.488393  |
| 92 | 1  | -2.707642 | 1.438494  | 2.914811  |
| 93 | 1  | -4.095293 | 2.360887  | 3.553371  |

Transition state (TS):

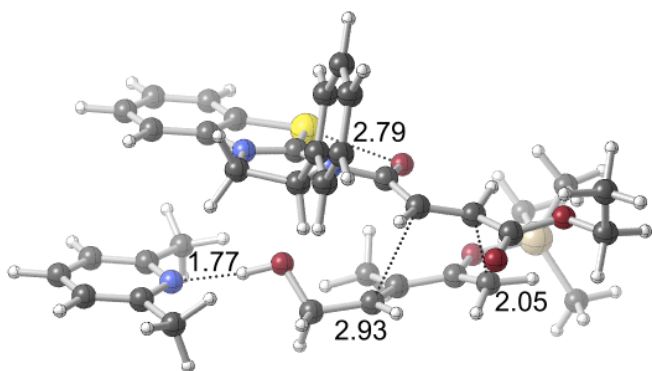

Charge = 1 Multiplicity = 1

HF = -2664.734806 hartrees (-1672147.73811306 kcal/mol)

Imaginary Frequencies: 1 (-410.8986 1/cm)

Zero-point correction = 0.774236 (Hartree/Particle)

Temperature 298.150 Kelvin. Pressure 1.00000 Atm.

Sum of electronic and thermal Free Energies =

-2664.045805 hartrees (-1671715.38309555 kcal/mol)

Coordinates (from last standard orientation):

| Center Number | Atomic Number | Coordinates (Angstroms) |           |           |
|---------------|---------------|-------------------------|-----------|-----------|
|               |               | X                       | Y         | Z         |
| 1             | 6             | -4.869586               | 0.027183  | -1.659229 |
| 2             | 6             | -3.505442               | -0.237164 | -1.715511 |
| 3             | 6             | -2.999718               | -1.372379 | -2.362774 |
| 4             | 6             | -3.854842               | -2.272920 | -2.986756 |
| 5             | 6             | -5.221603               | -2.009018 | -2.943108 |
| 6             | 6             | -5.720106               | -0.877701 | -2.285620 |
| 7             | 6             | -1.257608               | 0.018786  | -1.366903 |
| 8             | 6             | -2.424031               | 1.772212  | -0.426370 |
| 9             | 6             | -0.896895               | 1.950078  | -0.154273 |
| 10            | 6             | -0.352711               | 3.270818  | -0.649238 |
| 11            | 6             | 0.007470                | 4.254099  | 0.271177  |
| 12            | 6             | -0.241695               | 3.529584  | -2.017681 |
| 13            | 6             | 0.472995                | 5.491628  | -0.170036 |
| 14            | 6             | 0.227698                | 4.763255  | -2.457617 |
| 15            | 6             | 0.584552                | 5.746226  | -1.534361 |
| 16            | 6             | 1.038910                | 0.306155  | -0.743522 |
| 17            | 6             | 1.941587                | 1.063925  | 0.056785  |



|    |   |           |           |           |
|----|---|-----------|-----------|-----------|
| 18 | 6 | 3.266144  | 0.640090  | 0.076760  |
| 19 | 6 | 0.856570  | -0.666469 | 2.154661  |
| 20 | 6 | 3.648504  | -0.832300 | 1.458033  |
| 21 | 6 | -0.590356 | -0.454483 | 2.521205  |
| 22 | 6 | 2.733223  | -1.834053 | 1.145134  |
| 23 | 6 | 5.677173  | -3.816544 | 1.213359  |
| 24 | 6 | 5.293506  | -2.089919 | -1.349610 |
| 25 | 6 | 4.103383  | -4.923315 | -1.199217 |
| 26 | 6 | 1.330107  | -1.763198 | 1.511979  |
| 27 | 6 | 4.268225  | 1.588087  | 0.658391  |
| 28 | 6 | 6.545359  | 2.226328  | 0.636024  |
| 29 | 6 | 6.528388  | 3.563506  | -0.075508 |
| 30 | 6 | 0.452684  | -2.895928 | 1.055523  |
| 31 | 1 | -5.246299 | 0.903315  | -1.139774 |
| 32 | 1 | -3.469372 | -3.153656 | -3.490533 |
| 33 | 1 | -5.909725 | -2.695439 | -3.425299 |
| 34 | 1 | -6.790455 | -0.700499 | -2.261188 |
| 35 | 1 | -2.826830 | 2.576091  | -1.046766 |
| 36 | 1 | -3.002057 | 1.680060  | 0.494500  |
| 37 | 1 | -0.072355 | 4.046286  | 1.335989  |
| 38 | 1 | -0.515935 | 2.762953  | -2.739315 |
| 39 | 1 | 0.755012  | 6.251581  | 0.552339  |
| 40 | 1 | 0.317188  | 4.958247  | -3.522039 |
| 41 | 1 | 0.952029  | 6.707471  | -1.880412 |
| 42 | 1 | -0.694803 | 1.827368  | 0.912944  |
| 43 | 1 | 1.624945  | 1.931500  | 0.621235  |
| 44 | 1 | 1.547177  | 0.086603  | 2.517941  |
| 45 | 1 | 4.700233  | -1.008739 | 1.253429  |
| 46 | 1 | 3.456915  | -0.218032 | 2.329307  |
| 47 | 1 | 3.616817  | 0.035201  | -0.753627 |
| 48 | 1 | -0.893266 | -1.226562 | 3.247632  |
| 49 | 1 | -0.684522 | 0.514665  | 3.031179  |
| 50 | 1 | 5.929614  | -2.944451 | 1.824736  |
| 51 | 1 | 5.202209  | -4.560262 | 1.862731  |
| 52 | 1 | 6.616188  | -4.247414 | 0.846292  |
| 53 | 1 | 4.563599  | -1.776446 | -2.104719 |
| 54 | 1 | 5.642158  | -1.198426 | -0.816945 |
| 55 | 1 | 6.154378  | -2.513729 | -1.881722 |
| 56 | 1 | 3.621866  | -5.668452 | -0.556973 |
| 57 | 1 | 3.412965  | -4.678795 | -2.013600 |
| 58 | 1 | 4.993143  | -5.385833 | -1.641118 |
| 59 | 1 | 7.459389  | 1.670463  | 0.421403  |
| 60 | 1 | 6.438554  | 2.341373  | 1.717194  |
| 61 | 1 | 7.384343  | 4.162475  | 0.249689  |
| 62 | 1 | 6.597926  | 3.421855  | -1.157743 |
| 63 | 1 | 5.612875  | 4.114975  | 0.153066  |

|    |    |           |           |           |
|----|----|-----------|-----------|-----------|
| 64 | 1  | 0.408133  | -2.911198 | -0.038674 |
| 65 | 1  | 0.870071  | -3.855513 | 1.376592  |
| 66 | 1  | -0.560969 | -2.793498 | 1.442603  |
| 67 | 8  | 1.307289  | -0.738031 | -1.340995 |
| 68 | 8  | 3.052966  | -2.877249 | 0.382296  |
| 69 | 8  | 4.011450  | 2.426682  | 1.492902  |
| 70 | 8  | 5.486515  | 1.372210  | 0.153685  |
| 71 | 8  | -1.414244 | -0.502654 | 1.371313  |
| 72 | 7  | -2.470634 | 0.510487  | -1.164843 |
| 73 | 7  | -0.295839 | 0.787699  | -0.860506 |
| 74 | 16 | -1.231627 | -1.460433 | -2.240823 |
| 75 | 14 | 4.566668  | -3.400433 | -0.231368 |
| 76 | 1  | -2.360343 | -0.497664 | 1.674035  |
| 77 | 6  | -4.630738 | 0.619561  | 2.684206  |
| 78 | 6  | -6.007478 | 0.819913  | 2.735468  |
| 79 | 6  | -6.842172 | -0.090171 | 2.090473  |
| 80 | 6  | -6.282543 | -1.169318 | 1.420635  |
| 81 | 6  | -4.891387 | -1.304652 | 1.403542  |
| 82 | 7  | -4.097483 | -0.417885 | 2.016345  |
| 83 | 1  | -7.919616 | 0.044425  | 2.113070  |
| 84 | 1  | -6.412493 | 1.671794  | 3.271978  |
| 85 | 1  | -6.901590 | -1.899851 | 0.908860  |
| 86 | 6  | -4.222546 | -2.459549 | 0.712372  |
| 87 | 1  | -4.261235 | -3.353457 | 1.346025  |
| 88 | 1  | -4.724299 | -2.698490 | -0.230199 |
| 89 | 1  | -3.171004 | -2.230953 | 0.516110  |
| 90 | 6  | -3.661216 | 1.523557  | 3.393929  |
| 91 | 1  | -3.283011 | 1.029037  | 4.296290  |
| 92 | 1  | -2.797172 | 1.745976  | 2.758251  |
| 93 | 1  | -4.134648 | 2.461410  | 3.693022  |

*Product:*

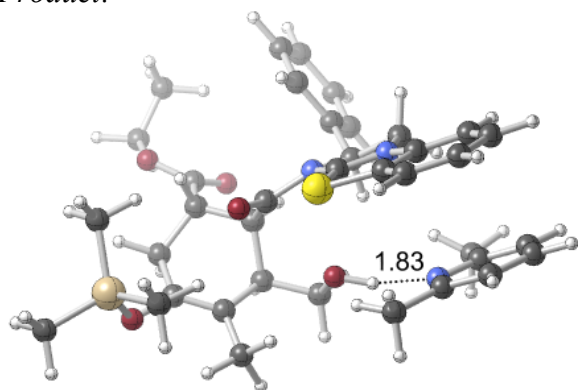

Charge = 1 Multiplicity = 1

HF = -2664.809906 hartrees (-1672194.86411406 kcal/mol)

Imaginary Frequencies: none found

Zero-point correction = 0.780567 (Hartree/Particle)

Temperature 298.150 Kelvin. Pressure 1.00000 Atm.

Sum of electronic and thermal Free Energies =

-2664.111084 hartrees (-1671756.34632084 kcal/mol)

Coordinates (from last standard orientation):

| -----  |        |                         |           |           |
|--------|--------|-------------------------|-----------|-----------|
| Center | Atomic | Coordinates (Angstroms) |           |           |
| Number | Number | X                       | Y         | Z         |
| -----  |        |                         |           |           |
| 1      | 6      | -4.938792               | 1.071080  | -1.593191 |
| 2      | 6      | -3.692276               | 0.457631  | -1.537143 |
| 3      | 6      | -3.485936               | -0.849542 | -1.996054 |
| 4      | 6      | -4.540707               | -1.590824 | -2.519318 |
| 5      | 6      | -5.791953               | -0.984061 | -2.574618 |
| 6      | 6      | -5.986322               | 0.327392  | -2.121599 |
| 7      | 6      | -1.455038               | 0.196681  | -1.145664 |
| 8      | 6      | -2.138304               | 2.301550  | -0.507312 |
| 9      | 6      | -0.698058               | 2.034633  | 0.018842  |
| 10     | 6      | 0.257400                | 3.160664  | -0.292648 |
| 11     | 6      | 0.479950                | 4.139152  | 0.675821  |
| 12     | 6      | 0.880098                | 3.259021  | -1.539003 |
| 13     | 6      | 1.304739                | 5.225598  | 0.394510  |
| 14     | 6      | 1.716261                | 4.338210  | -1.812532 |
| 15     | 6      | 1.921491                | 5.327269  | -0.850358 |
| 16     | 6      | 0.769127                | -0.084762 | -0.350457 |
| 17     | 6      | 1.744441                | 0.380581  | 0.705418  |
| 18     | 6      | 3.179378                | 0.276102  | 0.146509  |
| 19     | 6      | 1.576300                | -0.461575 | 2.013317  |
| 20     | 6      | 4.006040                | -0.874957 | 0.786851  |
| 21     | 6      | 0.180756                | -0.293571 | 2.604386  |
| 22     | 6      | 3.160629                | -2.069209 | 1.144011  |
| 23     | 6      | 4.627135                | -5.466190 | -0.686802 |
| 24     | 6      | 3.835867                | -2.776733 | -2.007917 |
| 25     | 6      | 1.671254                | -4.566159 | -0.818414 |
| 26     | 6      | 1.991704                | -1.903168 | 1.773883  |
| 27     | 6      | 3.942430                | 1.565030  | 0.386129  |
| 28     | 6      | 5.957642                | 2.698008  | -0.124498 |
| 29     | 6      | 5.491172                | 3.928581  | -0.873540 |
| 30     | 6      | 1.137734                | -3.044217 | 2.245640  |
| 31     | 1      | -5.073356               | 2.087217  | -1.236257 |
| 32     | 1      | -4.391462               | -2.603789 | -2.879486 |

|    |    |           |           |           |
|----|----|-----------|-----------|-----------|
| 33 | 1  | -6.630531 | -1.538230 | -2.983323 |
| 34 | 1  | -6.973974 | 0.772455  | -2.183521 |
| 35 | 1  | -2.151978 | 3.040841  | -1.313021 |
| 36 | 1  | -2.824245 | 2.596694  | 0.288546  |
| 37 | 1  | 0.007801  | 4.047188  | 1.651476  |
| 38 | 1  | 0.712894  | 2.493621  | -2.292953 |
| 39 | 1  | 1.470466  | 5.986544  | 1.150680  |
| 40 | 1  | 2.205368  | 4.410224  | -2.779374 |
| 41 | 1  | 2.568926  | 6.171049  | -1.069849 |
| 42 | 1  | -0.731944 | 1.844134  | 1.096420  |
| 43 | 1  | 1.552268  | 1.423909  | 0.962002  |
| 44 | 1  | 2.272072  | 0.006580  | 2.726819  |
| 45 | 1  | 4.811216  | -1.165991 | 0.109470  |
| 46 | 1  | 4.480293  | -0.494527 | 1.703363  |
| 47 | 1  | 3.150428  | 0.101945  | -0.933249 |
| 48 | 1  | 0.095540  | -0.890505 | 3.522529  |
| 49 | 1  | 0.044307  | 0.762880  | 2.887539  |
| 50 | 1  | 5.668649  | -5.136132 | -0.608843 |
| 51 | 1  | 4.427312  | -6.155123 | 0.141293  |
| 52 | 1  | 4.522055  | -6.027432 | -1.622428 |
| 53 | 1  | 3.140403  | -1.930646 | -1.957687 |
| 54 | 1  | 4.861064  | -2.395025 | -1.951534 |
| 55 | 1  | 3.709080  | -3.246587 | -2.990978 |
| 56 | 1  | 1.410451  | -5.341530 | -0.090219 |
| 57 | 1  | 0.992025  | -3.716890 | -0.682380 |
| 58 | 1  | 1.498783  | -4.975976 | -1.821342 |
| 59 | 1  | 6.921265  | 2.344530  | -0.494841 |
| 60 | 1  | 6.033355  | 2.886449  | 0.949267  |
| 61 | 1  | 6.237185  | 4.722821  | -0.771863 |
| 62 | 1  | 5.366250  | 3.706646  | -1.937735 |
| 63 | 1  | 4.541186  | 4.288969  | -0.471508 |
| 64 | 1  | 0.142532  | -3.012188 | 1.789425  |
| 65 | 1  | 1.610333  | -3.999700 | 2.009448  |
| 66 | 1  | 0.992502  | -3.003382 | 3.332719  |
| 67 | 8  | 0.870250  | -1.114703 | -0.981030 |
| 68 | 8  | 3.702218  | -3.297751 | 0.858497  |
| 69 | 8  | 3.626894  | 2.428955  | 1.172949  |
| 70 | 8  | 5.065156  | 1.585154  | -0.337653 |
| 71 | 8  | -0.770396 | -0.692796 | 1.639684  |
| 72 | 7  | -2.506090 | 0.991903  | -1.046969 |
| 73 | 7  | -0.337188 | 0.751296  | -0.645742 |
| 74 | 16 | -1.790305 | -1.339842 | -1.826722 |
| 75 | 14 | 3.452428  | -4.014062 | -0.655270 |
| 76 | 1  | -1.699093 | -0.568364 | 1.958335  |
| 77 | 6  | -4.130169 | 0.733707  | 2.245565  |
| 78 | 6  | -5.480990 | 0.947430  | 1.979829  |

|    |   |           |           |          |
|----|---|-----------|-----------|----------|
| 79 | 6 | -6.209295 | -0.061579 | 1.354291 |
| 80 | 6 | -5.572577 | -1.247641 | 1.018067 |
| 81 | 6 | -4.213789 | -1.391566 | 1.311620 |
| 82 | 7 | -3.516632 | -0.411352 | 1.903408 |
| 83 | 1 | -7.262951 | 0.080112  | 1.130701 |
| 84 | 1 | -5.948321 | 1.884600  | 2.264788 |
| 85 | 1 | -6.106161 | -2.056767 | 0.529411 |
| 86 | 6 | -3.486915 | -2.675104 | 1.019418 |
| 87 | 1 | -3.672118 | -3.398880 | 1.821859 |
| 88 | 1 | -3.837704 | -3.123183 | 0.084791 |
| 89 | 1 | -2.408886 | -2.505466 | 0.963765 |
| 90 | 6 | -3.287949 | 1.749700  | 2.965445 |
| 91 | 1 | -3.072850 | 1.405325  | 3.983373 |
| 92 | 1 | -2.326183 | 1.882304  | 2.459527 |
| 93 | 1 | -3.791821 | 2.716839  | 3.030803 |

*Diels-Alder TSS with explicit DMP (exo)*

*Reactant:*

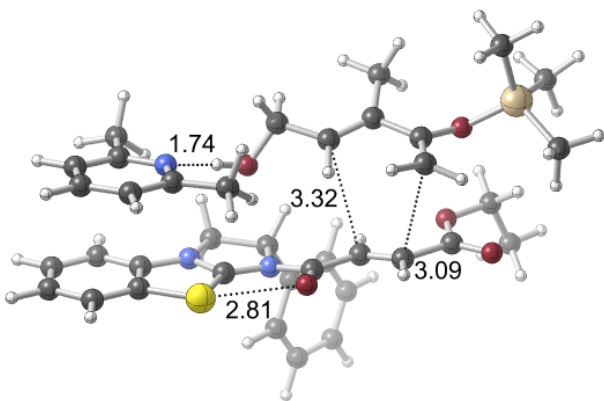

Charge = 1 Multiplicity = 1

HF = -2664.7516116 hartrees (-1672158.28379512 kcal/mol)

Imaginary Frequencies: none found

Zero-point correction = 0.774875 (Hartree/Particle)

Temperature 298.150 Kelvin. Pressure 1.00000 Atm.

Sum of electronic and thermal Free Energies =

-2664.063546 hartrees (-1671726.51575046 kcal/mol)

Coordinates (from last standard orientation):

| Center<br>Number | Atomic<br>Number | Coordinates (Angstroms) |           |           |
|------------------|------------------|-------------------------|-----------|-----------|
|                  |                  | X                       | Y         | Z         |
| 1                | 6                | -5.509026               | 1.094107  | 1.104228  |
| 2                | 6                | -4.475748               | 0.889089  | 0.195094  |
| 3                | 6                | -4.699682               | 0.303659  | -1.058389 |
| 4                | 6                | -5.975568               | -0.101853 | -1.436190 |
| 5                | 6                | -7.012875               | 0.105484  | -0.533406 |
| 6                | 6                | -6.782084               | 0.693683  | 0.717507  |
| 7                | 6                | -2.371022               | 0.911450  | -0.688010 |
| 8                | 6                | -2.360491               | 1.829329  | 1.434508  |
| 9                | 6                | -0.933595               | 1.951829  | 0.817184  |
| 10               | 6                | -0.445686               | 3.374479  | 0.680101  |
| 11               | 6                | 0.685160                | 3.785630  | 1.384508  |
| 12               | 6                | -1.127676               | 4.286043  | -0.130500 |
| 13               | 6                | 1.135294                | 5.100916  | 1.281121  |
| 14               | 6                | -0.676094               | 5.597211  | -0.236506 |
| 15               | 6                | 0.456170                | 6.005795  | 0.470042  |
| 16               | 6                | -0.091757               | 0.821086  | -1.374067 |
| 17               | 6                | 2.300071                | 0.750713  | -1.781574 |
| 18               | 6                | 1.297105                | 1.115437  | -0.978563 |
| 19               | 6                | 1.080831                | -1.726950 | 0.726279  |
| 20               | 6                | 3.236496                | -2.152552 | -1.276773 |
| 21               | 6                | 2.381004                | -1.793905 | 1.057763  |
| 22               | 6                | 3.425471                | -1.773689 | -0.002508 |
| 23               | 6                | -0.106331               | -1.821692 | 1.641450  |
| 24               | 6                | 6.778574                | -1.808145 | -1.513616 |
| 25               | 6                | 5.904419                | -3.909348 | 0.572487  |
| 26               | 6                | 7.232540                | -1.273580 | 1.485709  |
| 27               | 6                | 2.906558                | -1.890633 | 2.466968  |
| 28               | 6                | 3.727565                | 0.999000  | -1.433000 |
| 29               | 6                | 5.214408                | 1.705613  | 0.258160  |
| 30               | 6                | 5.591564                | 3.132093  | -0.085956 |
| 31               | 1                | -5.318349               | 1.549062  | 2.070920  |
| 32               | 1                | -6.153589               | -0.562910 | -2.402439 |
| 33               | 1                | -8.018984               | -0.196935 | -0.804522 |
| 34               | 1                | -7.611997               | 0.840978  | 1.400757  |
| 35               | 1                | -2.794563               | 2.802816  | 1.671220  |
| 36               | 1                | -2.365654               | 1.179076  | 2.309131  |
| 37               | 1                | 1.215603                | 3.071814  | 2.011125  |
| 38               | 1                | -2.013201               | 3.968174  | -0.678582 |
| 39               | 1                | 2.016802                | 5.413657  | 1.832390  |
| 40               | 1                | -1.206067               | 6.301853  | -0.870052 |
| 41               | 1                | 0.807645                | 7.029571  | 0.385673  |

|    |    |           |           |           |
|----|----|-----------|-----------|-----------|
| 42 | 1  | -0.237296 | 1.350512  | 1.403253  |
| 43 | 1  | 2.123783  | 0.277643  | -2.742840 |
| 44 | 1  | 1.492745  | 1.606466  | -0.033452 |
| 45 | 1  | 0.816186  | -1.627598 | -0.327198 |
| 46 | 1  | 4.029194  | -2.049385 | -2.011253 |
| 47 | 1  | 2.291606  | -2.570375 | -1.603215 |
| 48 | 1  | -0.517034 | -2.843168 | 1.594407  |
| 49 | 1  | 0.174080  | -1.640316 | 2.685233  |
| 50 | 1  | 7.865505  | -1.954813 | -1.529769 |
| 51 | 1  | 6.341189  | -2.506587 | -2.235299 |
| 52 | 1  | 6.565682  | -0.789622 | -1.857641 |
| 53 | 1  | 5.589219  | -4.083682 | 1.607334  |
| 54 | 1  | 5.158620  | -4.359659 | -0.091423 |
| 55 | 1  | 6.850470  | -4.441703 | 0.418853  |
| 56 | 1  | 8.190545  | -1.803100 | 1.547769  |
| 57 | 1  | 7.448110  | -0.228763 | 1.237591  |
| 58 | 1  | 6.772476  | -1.298828 | 2.479973  |
| 59 | 1  | -1.924638 | -1.413788 | 1.045456  |
| 60 | 1  | 3.529919  | -1.021310 | 2.699824  |
| 61 | 1  | 2.107608  | -1.957020 | 3.206257  |
| 62 | 1  | 3.544920  | -2.775221 | 2.578454  |
| 63 | 1  | 5.891868  | 0.986174  | -0.205622 |
| 64 | 1  | 5.195343  | 1.535585  | 1.336362  |
| 65 | 1  | 4.878365  | 3.836683  | 0.351867  |
| 66 | 1  | 6.587645  | 3.355089  | 0.307908  |
| 67 | 1  | 5.608695  | 3.275442  | -1.170111 |
| 68 | 8  | -0.417281 | 0.199628  | -2.369949 |
| 69 | 8  | 4.629702  | -1.312953 | 0.443444  |
| 70 | 8  | -1.105728 | -0.891957 | 1.253373  |
| 71 | 8  | 3.872163  | 1.424211  | -0.178912 |
| 72 | 8  | 4.632703  | 0.839318  | -2.221598 |
| 73 | 7  | -3.128324 | 1.199350  | 0.354125  |
| 74 | 7  | -1.092713 | 1.289484  | -0.516046 |
| 75 | 16 | -3.203452 | 0.178212  | -1.994753 |
| 76 | 14 | 6.123519  | -2.085057 | 0.218960  |
| 77 | 6  | -3.308308 | -2.961300 | -0.620854 |
| 78 | 6  | -4.476289 | -3.500986 | -1.162191 |
| 79 | 6  | -5.654671 | -3.416888 | -0.428913 |
| 80 | 6  | -5.640309 | -2.806386 | 0.821034  |
| 81 | 6  | -4.439461 | -2.284114 | 1.297931  |
| 82 | 7  | -3.310485 | -2.356421 | 0.575389  |
| 83 | 1  | -6.579282 | -3.822945 | -0.829097 |
| 84 | 1  | -4.451033 | -3.976385 | -2.137512 |
| 85 | 1  | -6.542368 | -2.727488 | 1.419198  |
| 86 | 6  | -1.983807 | -3.042230 | -1.327920 |
| 87 | 1  | -1.423881 | -3.917860 | -0.977481 |

|    |   |           |           |           |
|----|---|-----------|-----------|-----------|
| 88 | 1 | -2.111370 | -3.134470 | -2.409496 |
| 89 | 1 | -1.383656 | -2.152852 | -1.112987 |
| 90 | 6 | -4.323051 | -1.642020 | 2.651738  |
| 91 | 1 | -3.881978 | -2.349681 | 3.363430  |
| 92 | 1 | -3.663789 | -0.769460 | 2.606249  |
| 93 | 1 | -5.299155 | -1.336405 | 3.035577  |

*Transition state (TS):*

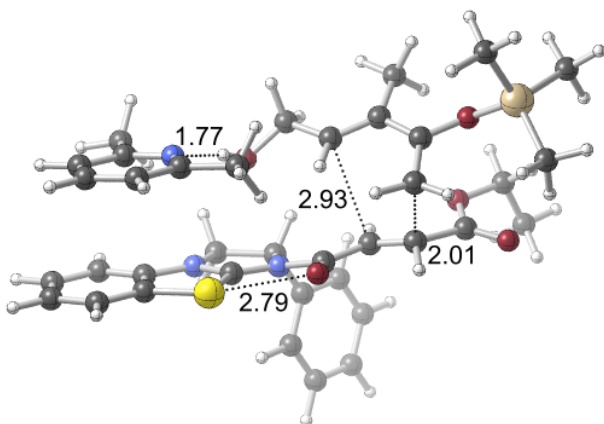

Charge = 1 Multiplicity = 1

HF = -2664.7374882 hartrees (-1672149.42122038 kcal/mol)

Imaginary Frequencies: 1 (-390.1744 1/cm)

Zero-point correction = 0.775625 (Hartree/Particle)

Temperature 298.150 Kelvin. Pressure 1.00000 Atm.

Sum of electronic and thermal Free Energies =

-2664.045355 hartrees (-1671715.10071605 kcal/mol)

Coordinates (from last standard orientation):

| Center<br>Number | Atomic<br>Number | Coordinates (Angstroms) |           |           |
|------------------|------------------|-------------------------|-----------|-----------|
|                  |                  | X                       | Y         | Z         |
| 1                | 6                | -5.620449               | 0.987076  | 0.714275  |
| 2                | 6                | -4.481942               | 0.743694  | -0.047364 |
| 3                | 6                | -4.533815               | -0.018074 | -1.222726 |
| 4                | 6                | -5.735926               | -0.550159 | -1.674352 |
| 5                | 6                | -6.879615               | -0.301195 | -0.922361 |
| 6                | 6                | -6.819991               | 0.452296  | 0.256758  |
| 7                | 6                | -2.288832               | 0.776037  | -0.697596 |
| 8                | 6                | -2.570701               | 2.027569  | 1.224979  |
| 9                | 6                | -1.088032               | 2.127154  | 0.746548  |



|    |   |           |           |           |
|----|---|-----------|-----------|-----------|
| 10 | 6 | -0.647427 | 3.531273  | 0.399095  |
| 11 | 6 | 0.390224  | 4.137811  | 1.105776  |
| 12 | 6 | -1.286740 | 4.233525  | -0.626791 |
| 13 | 6 | 0.786887  | 5.437313  | 0.791774  |
| 14 | 6 | -0.889543 | 5.528114  | -0.942080 |
| 15 | 6 | 0.148546  | 6.132299  | -0.232240 |
| 16 | 6 | 0.067421  | 0.740633  | -1.145462 |
| 17 | 6 | 2.464998  | 0.636315  | -1.342327 |
| 18 | 6 | 1.347397  | 1.083789  | -0.633731 |
| 19 | 6 | 1.036308  | -1.215287 | 1.158975  |
| 20 | 6 | 2.775081  | -1.341412 | -1.154206 |
| 21 | 6 | 2.378451  | -1.344718 | 1.316387  |
| 22 | 6 | 3.232954  | -1.465687 | 0.155744  |
| 23 | 6 | 0.044315  | -1.026843 | 2.278228  |
| 24 | 6 | 6.051928  | -1.989456 | -2.099584 |
| 25 | 6 | 5.241441  | -4.196176 | -0.086880 |
| 26 | 6 | 7.273052  | -1.976850 | 0.723820  |
| 27 | 6 | 3.061191  | -1.286219 | 2.658303  |
| 28 | 6 | 3.827232  | 1.101327  | -0.936288 |
| 29 | 6 | 5.161906  | 1.814150  | 0.876273  |
| 30 | 6 | 5.468183  | 3.263374  | 0.559168  |
| 31 | 1 | -5.564455 | 1.573517  | 1.625701  |
| 32 | 1 | -5.777433 | -1.140786 | -2.584034 |
| 33 | 1 | -7.831509 | -0.700766 | -1.256041 |
| 34 | 1 | -7.727819 | 0.628792  | 0.824505  |
| 35 | 1 | -3.068256 | 2.999690  | 1.226529  |
| 36 | 1 | -2.647522 | 1.553141  | 2.203350  |
| 37 | 1 | 0.891674  | 3.590742  | 1.901153  |
| 38 | 1 | -2.095508 | 3.765077  | -1.184573 |
| 39 | 1 | 1.596986  | 5.903736  | 1.344211  |
| 40 | 1 | -1.388524 | 6.065665  | -1.742539 |
| 41 | 1 | 0.458406  | 7.142918  | -0.480358 |
| 42 | 1 | -0.432731 | 1.685502  | 1.499130  |
| 43 | 1 | 2.359498  | 0.492267  | -2.414484 |
| 44 | 1 | 1.455348  | 1.620436  | 0.298052  |
| 45 | 1 | 0.583788  | -1.361548 | 0.182425  |
| 46 | 1 | 3.490996  | -1.494373 | -1.956008 |
| 47 | 1 | 1.750756  | -1.605761 | -1.397658 |
| 48 | 1 | -0.074473 | -1.982129 | 2.816431  |
| 49 | 1 | 0.424848  | -0.303382 | 3.008013  |
| 50 | 1 | 7.060815  | -2.306061 | -2.391919 |
| 51 | 1 | 5.344476  | -2.492584 | -2.767163 |
| 52 | 1 | 5.976737  | -0.909140 | -2.265081 |
| 53 | 1 | 5.115018  | -4.445413 | 0.972507  |
| 54 | 1 | 4.286495  | -4.378232 | -0.593545 |
| 55 | 1 | 5.979330  | -4.886153 | -0.511426 |

|    |    |           |           |           |
|----|----|-----------|-----------|-----------|
| 56 | 1  | 8.126641  | -2.610454 | 0.457622  |
| 57 | 1  | 7.569905  | -0.935386 | 0.557837  |
| 58 | 1  | 7.074500  | -2.109943 | 1.792563  |
| 59 | 1  | -1.726910 | -1.303455 | 1.447102  |
| 60 | 1  | 3.723106  | -0.415478 | 2.717130  |
| 61 | 1  | 2.343320  | -1.237202 | 3.478591  |
| 62 | 1  | 3.686259  | -2.172615 | 2.807991  |
| 63 | 1  | 5.915171  | 1.138006  | 0.464913  |
| 64 | 1  | 5.081247  | 1.648196  | 1.951944  |
| 65 | 1  | 4.682497  | 3.915799  | 0.951724  |
| 66 | 1  | 6.417681  | 3.548569  | 1.022046  |
| 67 | 1  | 5.549028  | 3.415474  | -0.520172 |
| 68 | 8  | -0.159877 | -0.003926 | -2.105881 |
| 69 | 8  | 4.544752  | -1.471374 | 0.418411  |
| 70 | 8  | -1.198101 | -0.549116 | 1.817385  |
| 71 | 8  | 3.872031  | 1.437226  | 0.355999  |
| 72 | 8  | 4.783744  | 1.118602  | -1.679639 |
| 73 | 7  | -3.179465 | 1.166427  | 0.203992  |
| 74 | 7  | -1.066360 | 1.244028  | -0.452363 |
| 75 | 16 | -2.936563 | -0.178038 | -1.971355 |
| 76 | 14 | 5.782143  | -2.421745 | -0.301624 |
| 77 | 6  | -2.828405 | -3.153820 | -0.286096 |
| 78 | 6  | -3.924695 | -3.782551 | -0.877378 |
| 79 | 6  | -5.177668 | -3.638678 | -0.290716 |
| 80 | 6  | -5.304525 | -2.880078 | 0.867155  |
| 81 | 6  | -4.167403 | -2.273856 | 1.400016  |
| 82 | 7  | -2.963997 | -2.407224 | 0.819626  |
| 83 | 1  | -6.048082 | -4.114669 | -0.733503 |
| 84 | 1  | -3.787692 | -4.374470 | -1.776550 |
| 85 | 1  | -6.266258 | -2.748322 | 1.352080  |
| 86 | 6  | -1.440299 | -3.267911 | -0.851143 |
| 87 | 1  | -0.753826 | -3.660381 | -0.092985 |
| 88 | 1  | -1.418993 | -3.931331 | -1.718904 |
| 89 | 1  | -1.068654 | -2.284089 | -1.162768 |
| 90 | 6  | -4.214795 | -1.464549 | 2.665922  |
| 91 | 1  | -3.693813 | -1.996719 | 3.469967  |
| 92 | 1  | -3.704456 | -0.506599 | 2.530661  |
| 93 | 1  | -5.244538 | -1.282335 | 2.981704  |

*Product:*

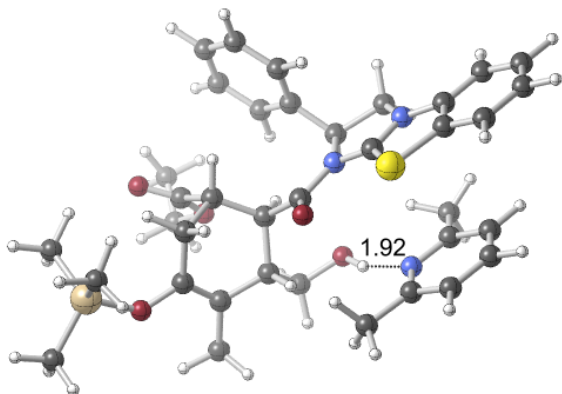

Charge = 1 Multiplicity = 1

HF = -2664.811776 hartrees (-1672196.03755776 kcal/mol)

Imaginary Frequencies: none found

Zero-point correction = 0.782027 (Hartree/Particle)

Temperature 298.150 Kelvin. Pressure 1.00000 Atm.

Sum of electronic and thermal Free Energies =

-2664.110817 hartrees (-1671756.17877567 kcal/mol)

Coordinates (from last standard orientation):

| Center<br>Number | Atomic<br>Number | Coordinates (Angstroms) |           |           |
|------------------|------------------|-------------------------|-----------|-----------|
|                  |                  | X                       | Y         | Z         |
| 1                | 6                | -5.952387               | 1.703789  | -0.506832 |
| 2                | 6                | -4.778584               | 1.001377  | -0.763180 |
| 3                | 6                | -4.764631               | -0.153504 | -1.556587 |
| 4                | 6                | -5.940041               | -0.642708 | -2.117735 |
| 5                | 6                | -7.116455               | 0.053804  | -1.863871 |
| 6                | 6                | -7.121685               | 1.209410  | -1.070275 |
| 7                | 6                | -2.576529               | 0.411206  | -0.661810 |
| 8                | 6                | -2.946826               | 2.351224  | 0.548739  |
| 9                | 6                | -1.432100               | 1.982244  | 0.622779  |
| 10               | 6                | -0.511792               | 3.004033  | -0.003838 |
| 11               | 6                | 0.518835                | 3.569355  | 0.744860  |
| 12               | 6                | -0.662996               | 3.350231  | -1.350749 |
| 13               | 6                | 1.396954                | 4.475610  | 0.150071  |
| 14               | 6                | 0.218162                | 4.247479  | -1.944539 |
| 15               | 6                | 1.251498                | 4.809256  | -1.193583 |
| 16               | 6                | -0.273451               | -0.159741 | -0.333301 |
| 17               | 6                | 2.087893                | 0.673917  | -0.449735 |

|    |   |           |           |           |
|----|---|-----------|-----------|-----------|
| 18 | 6 | 0.975504  | 0.130140  | 0.459688  |
| 19 | 6 | 1.370276  | -1.167672 | 1.225781  |
| 20 | 6 | 2.836560  | -0.466998 | -1.155490 |
| 21 | 6 | 2.809597  | -1.611423 | 1.051785  |
| 22 | 6 | 3.452312  | -1.356650 | -0.099179 |
| 23 | 6 | 0.912028  | -0.996555 | 2.678717  |
| 24 | 6 | 6.468945  | 0.006804  | -1.688200 |
| 25 | 6 | 4.940731  | -2.217333 | -3.222887 |
| 26 | 6 | 7.113851  | -2.948220 | -1.182667 |
| 27 | 6 | 3.402539  | -2.482885 | 2.124673  |
| 28 | 6 | 3.144522  | 1.452494  | 0.330921  |
| 29 | 6 | 3.987567  | 2.027422  | 2.463934  |
| 30 | 6 | 3.991753  | 3.540655  | 2.501737  |
| 31 | 1 | -5.942745 | 2.596168  | 0.110328  |
| 32 | 1 | -5.939378 | -1.539499 | -2.728650 |
| 33 | 1 | -8.047314 | -0.307836 | -2.287498 |
| 34 | 1 | -8.056939 | 1.729055  | -0.890652 |
| 35 | 1 | -3.111666 | 3.314751  | 0.062154  |
| 36 | 1 | -3.425156 | 2.340490  | 1.529358  |
| 37 | 1 | 0.641716  | 3.291307  | 1.789360  |
| 38 | 1 | -1.467573 | 2.912470  | -1.940467 |
| 39 | 1 | 2.196110  | 4.917201  | 0.736644  |
| 40 | 1 | 0.100661  | 4.507533  | -2.991991 |
| 41 | 1 | 1.941708  | 5.507976  | -1.656182 |
| 42 | 1 | -1.139959 | 1.773793  | 1.655205  |
| 43 | 1 | 1.677977  | 1.369666  | -1.192355 |
| 44 | 1 | 0.741726  | 0.895892  | 1.197184  |
| 45 | 1 | 0.752834  | -1.980873 | 0.818473  |
| 46 | 1 | 3.608750  | -0.024778 | -1.789010 |
| 47 | 1 | 2.149084  | -1.024147 | -1.803541 |
| 48 | 1 | 1.040033  | -1.932630 | 3.238124  |
| 49 | 1 | 1.508259  | -0.220587 | 3.172500  |
| 50 | 1 | 7.262994  | 0.051207  | -2.443801 |
| 51 | 1 | 5.721196  | 0.766027  | -1.936310 |
| 52 | 1 | 6.911181  | 0.284336  | -0.724517 |
| 53 | 1 | 4.404755  | -3.166666 | -3.108080 |
| 54 | 1 | 4.230493  | -1.470178 | -3.591315 |
| 55 | 1 | 5.700518  | -2.361217 | -4.000748 |
| 56 | 1 | 7.905027  | -2.938766 | -1.941029 |
| 57 | 1 | 7.572056  | -2.705662 | -0.217660 |
| 58 | 1 | 6.720514  | -3.968768 | -1.121014 |
| 59 | 1 | -1.014420 | -1.270731 | 2.342913  |
| 60 | 1 | 3.481101  | -1.946711 | 3.078753  |
| 61 | 1 | 2.778739  | -3.368265 | 2.306705  |
| 62 | 1 | 4.400038  | -2.822031 | 1.840805  |
| 63 | 1 | 4.932307  | 1.633558  | 2.081301  |

|    |    |           |           |           |
|----|----|-----------|-----------|-----------|
| 64 | 1  | 3.798801  | 1.604191  | 3.452270  |
| 65 | 1  | 3.032514  | 3.922451  | 2.865121  |
| 66 | 1  | 4.775286  | 3.883103  | 3.184872  |
| 67 | 1  | 4.193083  | 3.952478  | 1.509971  |
| 68 | 8  | -0.413016 | -1.094687 | -1.098024 |
| 69 | 8  | 4.687810  | -1.884669 | -0.325957 |
| 70 | 8  | -0.437648 | -0.566638 | 2.721362  |
| 71 | 8  | 2.916725  | 1.510672  | 1.646350  |
| 72 | 8  | 4.124251  | 1.922000  | -0.202312 |
| 73 | 7  | -3.500683 | 1.279253  | -0.287363 |
| 74 | 7  | -1.370328 | 0.693059  | -0.137784 |
| 75 | 16 | -3.141023 | -0.847168 | -1.676758 |
| 76 | 14 | 5.768540  | -1.727667 | -1.613900 |
| 77 | 6  | -2.447897 | -3.322497 | 0.791171  |
| 78 | 6  | -3.608315 | -3.864771 | 0.232743  |
| 79 | 6  | -4.821520 | -3.220372 | 0.438282  |
| 80 | 6  | -4.846345 | -2.058589 | 1.201754  |
| 81 | 6  | -3.650638 | -1.580079 | 1.739014  |
| 82 | 7  | -2.476218 | -2.198320 | 1.523675  |
| 83 | 1  | -5.737827 | -3.619013 | 0.012066  |
| 84 | 1  | -3.548658 | -4.778050 | -0.350419 |
| 85 | 1  | -5.774717 | -1.527341 | 1.389813  |
| 86 | 6  | -1.109085 | -3.967949 | 0.571301  |
| 87 | 1  | -0.497418 | -3.904454 | 1.476089  |
| 88 | 1  | -1.221043 | -5.018966 | 0.293442  |
| 89 | 1  | -0.573871 | -3.457226 | -0.237593 |
| 90 | 6  | -3.633959 | -0.363379 | 2.623245  |
| 91 | 1  | -3.717152 | -0.662817 | 3.674862  |
| 92 | 1  | -2.691483 | 0.181342  | 2.519857  |
| 93 | 1  | -4.475440 | 0.298122  | 2.395949  |

**c. Diels-Alder step of the DAL organocascade**

**iii. Entropy-controlled diastereoselection**

Upon realizing that the base was selectively stabilizing the *exo* TSS of the Diels-Alder step bringing the  $\Delta\Delta G$  to nearly zero from 1.3 kcal/mol (without explicit base), we began to question the origin of diastereoselectivity. A closer examination of energies led us to find that the difference in enthalpy ( $\Delta\Delta H$ ) between the two TSSs was zero. This led us to believe that the diastereoselectivity was controlled by entropy. Many model chemistries and basis sets were used (**Table S4**) to ensure that this was not an artifact of the level of theory initially used. Though the magnitudes and directions slightly change, enthalpy does not seem to control the diastereoselectivity of the asymmetric reaction. Furthermore, experimental results provided evidence for this rare case of entropy-controlled selectivity, as the diastereoselectivity of the reaction was temperature independent.

Table S2. Comparison of free energies ( $\Delta\Delta G$ ) and enthalpies ( $\Delta\Delta H$ ) of *endo* and *exo* TSSs from the background and enantioselective Diels-Alder reactions.

a. Comparing functionals – SMD(DCM) and 6-31G(d) basis set. Energies shown in kcal/mol relative to separated reactants.

| Model                                  | Free Energy, $\Delta\Delta G$ (kcal/mol) |                        |                              | Enthalpy, $\Delta\Delta H$ (kcal/mol) |                        |                              |
|----------------------------------------|------------------------------------------|------------------------|------------------------------|---------------------------------------|------------------------|------------------------------|
|                                        | M06-2X                                   | B3LYP-D3 <sup>14</sup> | $\omega$ B97xD <sup>15</sup> | M06-2X                                | B3LYP-D3 <sup>14</sup> | $\omega$ B97xD <sup>15</sup> |
| Background                             | 1.8                                      | 1.8                    | 2.9                          | 1.5                                   | 1.8                    | 2.2                          |
| <i>MAD</i> <sub>background</sub>       | 2.2                                      |                        |                              | 1.8                                   |                        |                              |
| Enantioselective                       | 1.3                                      | -1.1                   | -0.3                         | 0.0                                   | 0.2                    | 0.4                          |
| <i>MAD</i> <sub>enantioselective</sub> | 0.9                                      |                        |                              | 0.2                                   |                        |                              |

b. Comparing basis sets – SMD(DCM) and M06-2X functional. Energies shown in kcal/mol relative to separated reactants.

| Model                                  | Free Energy, $\Delta\Delta G$ (kcal/mol) |                           | Enthalpy, $\Delta\Delta H$ (kcal/mol) |                           |
|----------------------------------------|------------------------------------------|---------------------------|---------------------------------------|---------------------------|
|                                        | 6-31G(d)                                 | 6-31+G(d,p) <sup>16</sup> | 6-31G(d)                              | 6-31+G(d,p) <sup>16</sup> |
| Background                             | 1.8                                      | 1.2                       | 1.5                                   | 1.7                       |
| <i>MAD</i> <sub>background</sub>       | 1.5                                      |                           | 1.6                                   |                           |
| Enantioselective                       | 1.3                                      | -1.0                      | 0.0                                   | -0.5                      |
| <i>MAD</i> <sub>enantioselective</sub> | 1.2                                      |                           | 0.3                                   |                           |

c. Computed with SMD(DCM). Energies shown in kcal/mol relative to separated reactants.

| Model                                  | Free Energy, $\Delta\Delta G$ (kcal/mol) |                            | Enthalpy, $\Delta\Delta H$ (kcal/mol) |                            |
|----------------------------------------|------------------------------------------|----------------------------|---------------------------------------|----------------------------|
|                                        | B3LYP-D3/6-31+G(d,p)                     | $\omega$ B97xD/6-31+G(d,p) | B3LYP-D3/6-31+G(d,p)                  | $\omega$ B97xD/6-31+G(d,p) |
| Background                             | 1.0                                      | 3.2                        | 2.4                                   | 2.9                        |
| <i>MAD</i> <sub>background</sub>       | 2.1                                      |                            | 2.7                                   |                            |
| Enantioselective                       | 0.2                                      | 0.8                        | 0.5                                   | 0.8                        |
| <i>MAD</i> <sub>enantioselective</sub> | 0.5                                      |                            | 0.7                                   |                            |

### c. Lactonization step of DAL organocascade

Initial work towards modeling the lactonization step of the DAL organocascade involved searching for an  $S_N2$ -like mechanism where the nucleophilic attack of the terminal alcohol to the carbonyl would regenerate the BTM catalyst and result in a lactone with protonated oxygen. A scan of this  $S_N2$ -like mechanism showed that the energy only continues to increase (up to 35 kcal/mol) as the alcohol approaches the carbonyl (**Figure S3**). Unsurprisingly, attempts to optimize the lactone intermediate from such a mechanism were unsuccessful, as the lactone ring would open back up.

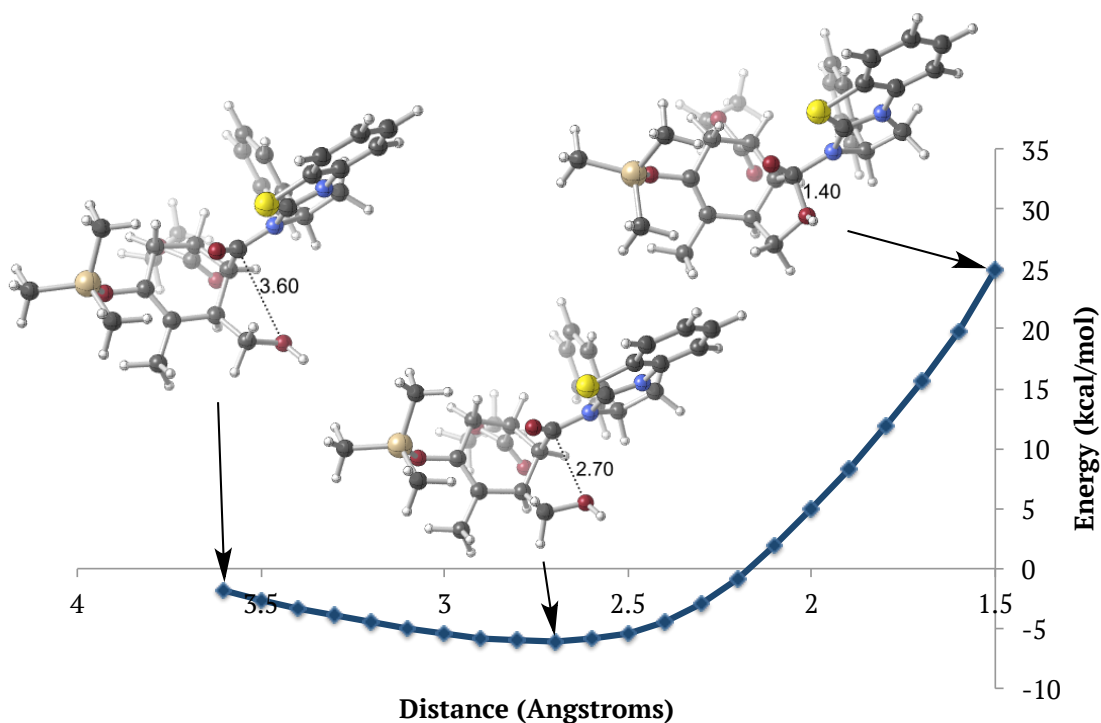

**Figure S4.** Scan of the O-C bond for  $\gamma$ -lactone formation. Select distances shown in Å.



We then considered an intermediate with a deprotonated alcohol, but protonated carbonyl oxygen to carry out the S<sub>N</sub>2-like mechanism; these changes bringing both a better nucleophile and electrophile and because of base and shuttle base in the solution; we reasoned such an intermediate could exist (though likely not for long or without coordination w/ molecules in solution). A scan of this structure (**Figure S4**) showed promise, but every attempt to locate a TSS failed. We were, however, able to find a tetrahedral intermediate (BTM catalyst not kicked off as a leaving group)  $-4.8$  kcal/mol relative to the Diels-Alder product. Based on this result, we chose to deprotonate the alcohol, but leave the carbonyl untouched and ran another scan. Based on the scan, we located another tetrahedral intermediate with an energy of  $-28.7$  kcal/mol relative to the Diels-Alder product and found that there was almost no barrier to reach this intermediate or the final lactone product, making this a very exergonic process if deprotonation of the terminal alcohol occurs. However, based on the pK<sub>a</sub>'s of the base and alcohol ( $\sim 6$  and  $\sim 16.0$ , respectively), deprotonation by base does not seem like a likely path. Therefore, paths *a* and *b* shown in **Scheme S1** were proposed as alternate routes. Though the energy of the intermediates for both pathways relative to the Diels-Alder product seem reasonable, the pathways would lead to scrambling of stereochemistry, which is not experimentally observed. Finally, we reasoned that deprotonation of the terminal alcohol likely occurs in a coordinated fashion with a proton-relay (path *c*).

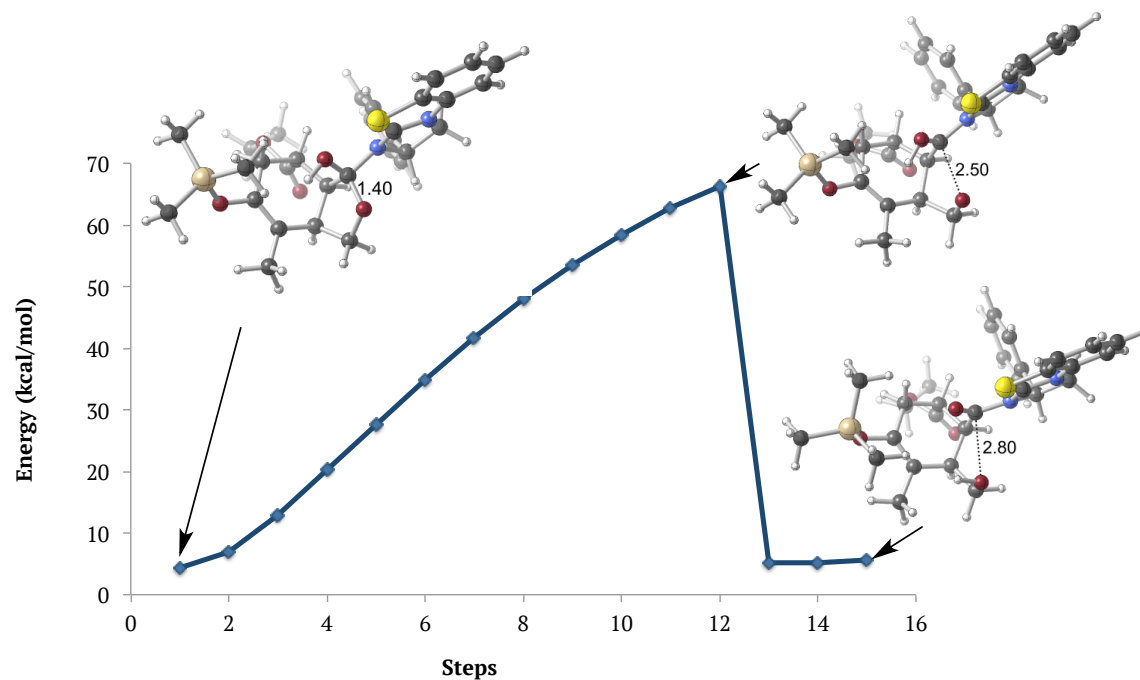

**Figure S5.** Scan of the O–C bond for  $\gamma$ -lactone formation with a protonated carbonyl (better electrophile) and deprotonated alcohol (better nucleophile). A proton-transfer also occurred during lactonization. Select distances shown in Å.

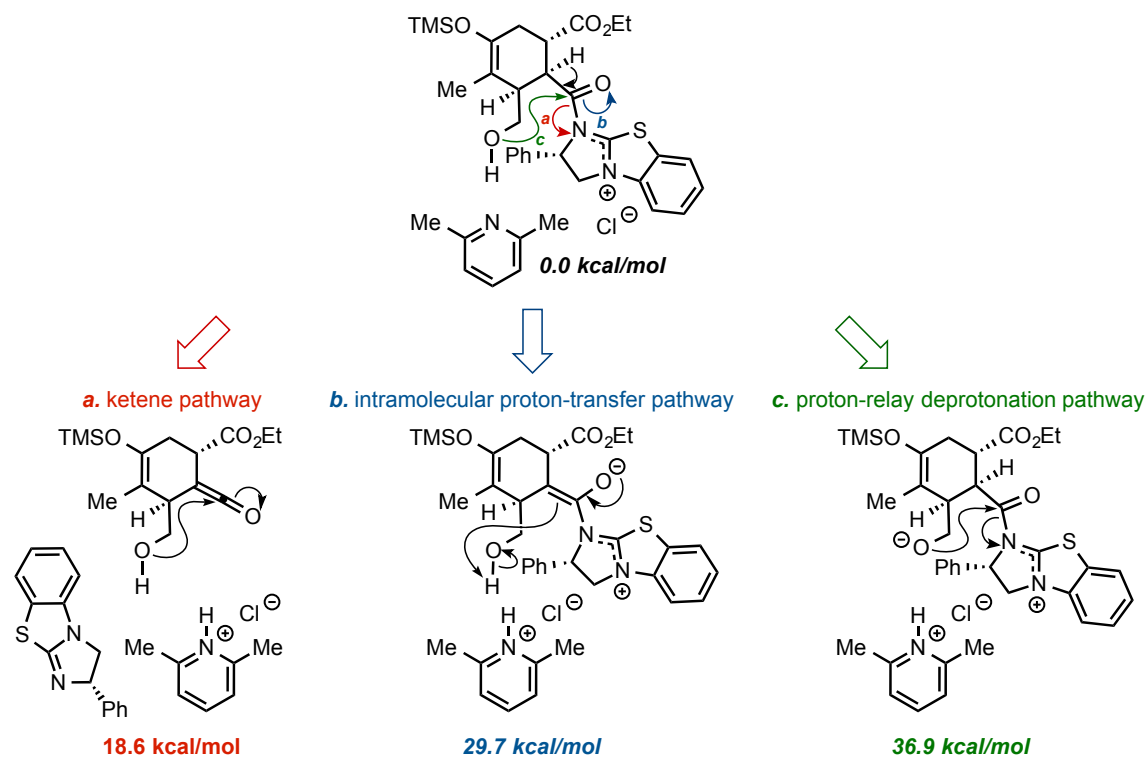

**Scheme S1.** Possible mechanistic routes for lactonization following the Diels-Alder step.

*γ*-lactone derived from protonated carbonyl and deprotonated alcohol:

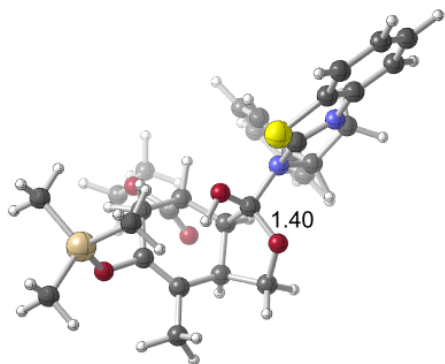

Charge = 1 Multiplicity = 1

HF = -2338.0134158 hartrees (-1467126.79854866 kcal/mol)

Imaginary Frequencies: none found

Zero-point correction = 0.634619 (Hartree/Particle)

Temperature 298.150 Kelvin. Pressure 1.00000 Atm.

Sum of electronic and thermal Free Energies =

-2337.449978 hartrees (-1466773.23569478 kcal/mol)

Coordinates (from last standard orientation):

| Center Number | Atomic Number | Coordinates (Angstroms) |           |           |
|---------------|---------------|-------------------------|-----------|-----------|
|               |               | X                       | Y         | Z         |
| 1             | 6             | -6.183318               | -0.346167 | -0.281287 |
| 2             | 6             | -4.845419               | -0.720615 | -0.230150 |
| 3             | 6             | -4.426108               | -2.010849 | -0.571396 |
| 4             | 6             | -5.345558               | -2.972949 | -0.972796 |
| 5             | 6             | -6.686442               | -2.604653 | -1.028059 |
| 6             | 6             | -7.098129               | -1.310420 | -0.687661 |
| 7             | 6             | -2.576563               | -0.534104 | 0.076619  |
| 8             | 6             | -3.629518               | 1.465416  | 0.540540  |
| 9             | 6             | -2.119641               | 1.562907  | 0.907052  |
| 10            | 6             | -1.469197               | 2.791786  | 0.314709  |
| 11            | 6             | -1.162718               | 3.873940  | 1.139596  |
| 12            | 6             | -1.201060               | 2.864236  | -1.054219 |
| 13            | 6             | -0.592954               | 5.025444  | 0.599212  |
| 14            | 6             | -0.617860               | 4.008614  | -1.590528 |
| 15            | 6             | -0.317791               | 5.092593  | -0.764454 |
| 16            | 6             | -0.306399               | -0.282446 | 0.913840  |
| 17            | 6             | 0.859519                | 0.716218  | 0.963042  |

|    |   |           |           |           |
|----|---|-----------|-----------|-----------|
| 18 | 6 | 1.619705  | 0.888446  | -0.347654 |
| 19 | 6 | 1.686815  | 0.177894  | 2.134479  |
| 20 | 6 | 2.480580  | -0.335990 | -0.723300 |
| 21 | 6 | 0.561598  | -0.253542 | 3.079448  |
| 22 | 6 | 2.981616  | -1.127225 | 0.455977  |
| 23 | 6 | 3.997795  | -3.028887 | -2.633485 |
| 24 | 6 | 1.853431  | -3.979432 | -0.632850 |
| 25 | 6 | 4.830126  | -4.716350 | -0.194840 |
| 26 | 6 | 2.626891  | -0.941341 | 1.737799  |
| 27 | 6 | 2.477015  | 2.143251  | -0.251552 |
| 28 | 6 | 3.979673  | 3.531098  | -1.442335 |
| 29 | 6 | 3.223736  | 4.834793  | -1.590684 |
| 30 | 6 | 3.216617  | -1.768575 | 2.848321  |
| 31 | 1 | -6.488245 | 0.660574  | -0.014304 |
| 32 | 1 | -5.028153 | -3.975835 | -1.239126 |
| 33 | 1 | -7.423041 | -3.335648 | -1.344487 |
| 34 | 1 | -8.150595 | -1.052435 | -0.741150 |
| 35 | 1 | -3.884393 | 2.099834  | -0.311917 |
| 36 | 1 | -4.280269 | 1.691566  | 1.385827  |
| 37 | 1 | -1.364936 | 3.811361  | 2.206224  |
| 38 | 1 | -1.440626 | 2.020251  | -1.697391 |
| 39 | 1 | -0.356163 | 5.865224  | 1.245224  |
| 40 | 1 | -0.401835 | 4.056502  | -2.653691 |
| 41 | 1 | 0.132541  | 5.986751  | -1.184972 |
| 42 | 1 | -1.995243 | 1.557174  | 1.995817  |
| 43 | 1 | 0.462285  | 1.687061  | 1.268957  |
| 44 | 1 | 2.262797  | 0.985552  | 2.599589  |
| 45 | 1 | 1.895560  | -1.000633 | -1.369926 |
| 46 | 1 | 3.347619  | -0.019696 | -1.313366 |
| 47 | 1 | 0.908074  | 1.070390  | -1.162654 |
| 48 | 1 | 0.823627  | -1.078061 | 3.745399  |
| 49 | 1 | 0.208656  | 0.592997  | 3.678149  |
| 50 | 1 | 3.278003  | -2.315365 | -3.049049 |
| 51 | 1 | 5.000483  | -2.601480 | -2.746015 |
| 52 | 1 | 3.954154  | -3.938308 | -3.244858 |
| 53 | 1 | 1.565645  | -4.017816 | 0.425494  |
| 54 | 1 | 1.154899  | -3.325164 | -1.167794 |
| 55 | 1 | 1.720053  | -4.988666 | -1.040157 |
| 56 | 1 | 4.774035  | -5.643380 | -0.776246 |
| 57 | 1 | 5.861976  | -4.351583 | -0.246137 |
| 58 | 1 | 4.611668  | -4.959526 | 0.850920  |
| 59 | 1 | 4.623211  | 3.340625  | -2.302758 |
| 60 | 1 | 4.585064  | 3.520263  | -0.532869 |
| 61 | 1 | 3.936848  | 5.658224  | -1.695998 |
| 62 | 1 | 2.589019  | 4.812447  | -2.481627 |
| 63 | 1 | 2.601902  | 5.023403  | -0.712271 |

|    |    |           |           |           |
|----|----|-----------|-----------|-----------|
| 64 | 1  | 3.404789  | -1.146630 | 3.731426  |
| 65 | 1  | 2.539247  | -2.573580 | 3.160886  |
| 66 | 1  | 4.158216  | -2.226822 | 2.539049  |
| 67 | 8  | -0.092106 | -1.387055 | 0.086199  |
| 68 | 8  | 3.907912  | -2.079837 | 0.130366  |
| 69 | 8  | 2.607516  | 2.821404  | 0.742874  |
| 70 | 8  | 3.082435  | 2.401566  | -1.413501 |
| 71 | 8  | -0.515275 | -0.698511 | 2.229875  |
| 72 | 7  | -3.758500 | 0.060785  | 0.152465  |
| 73 | 7  | -1.556255 | 0.281438  | 0.383299  |
| 74 | 16 | -2.668280 | -2.183639 | -0.423015 |
| 75 | 14 | 3.636711  | -3.436920 | -0.842962 |
| 76 | 1  | 0.572432  | -1.949114 | 0.528374  |

**c. Lactonization step of DAL organocascade**

**i. Proton-relay deprotonation pathway**

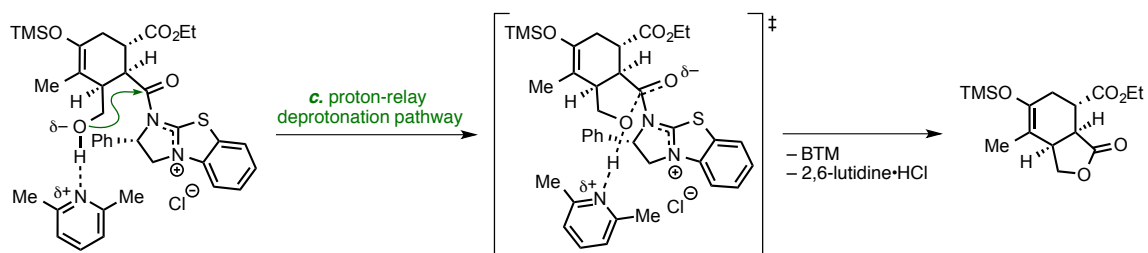

**Scheme S2.** Proposed lactonization pathway involving a proton-relay deprotonation of the substrate with various molecules (base, shuttle base, solvent) in solution.

Lactonization step after deprotonation of the alcohol moiety (endo):

Reactant:

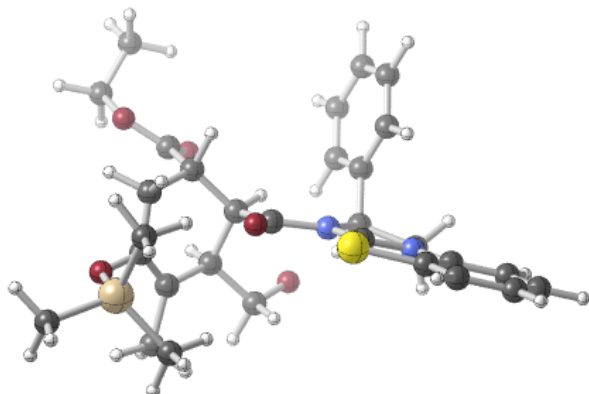

Charge = 0 Multiplicity = 1

HF = -2337.4920644 hartrees (-1466799.64533164 kcal/mol)

Imaginary Frequencies: none found

Zero-point correction = 0.619174 (Hartree/Particle)

Temperature 298.150 Kelvin. Pressure 1.00000 Atm.

Sum of electronic and thermal Free Energies =

-2336.943603 hartrees (-1466455.48031853 kcal/mol)

Coordinates (from last standard orientation):

| Center Number | Atomic Number | Coordinates (Angstroms) |           |           |
|---------------|---------------|-------------------------|-----------|-----------|
|               |               | X                       | Y         | Z         |
| 1             | 6             | -6.005652               | -0.175905 | 0.426782  |
| 2             | 6             | -4.697223               | -0.468682 | 0.054137  |
| 3             | 6             | -4.387497               | -1.576384 | -0.745330 |
| 4             | 6             | -5.390661               | -2.426335 | -1.199370 |
| 5             | 6             | -6.700594               | -2.137882 | -0.831523 |
| 6             | 6             | -7.002277               | -1.028821 | -0.030128 |
| 7             | 6             | -2.423722               | -0.276910 | -0.098665 |
| 8             | 6             | -3.276139               | 1.369290  | 1.281353  |
| 9             | 6             | -1.763442               | 1.637634  | 1.054017  |
| 10            | 6             | -1.477981               | 2.907191  | 0.284998  |
| 11            | 6             | -0.552334               | 3.811125  | 0.811991  |
| 12            | 6             | -2.114696               | 3.195053  | -0.925623 |
| 13            | 6             | -0.265577               | 4.993705  | 0.131044  |
| 14            | 6             | -1.828615               | 4.375990  | -1.603986 |
| 15            | 6             | -0.903627               | 5.277178  | -1.074436 |



|    |   |           |           |           |
|----|---|-----------|-----------|-----------|
| 16 | 6 | -0.048213 | -0.037485 | -0.061928 |
| 17 | 6 | 1.137983  | 0.751171  | 0.437185  |
| 18 | 6 | 2.212278  | 0.786505  | -0.661075 |
| 19 | 6 | 1.715957  | 0.177106  | 1.754953  |
| 20 | 6 | 2.856472  | -0.591959 | -0.897022 |
| 21 | 6 | 0.632398  | 0.206070  | 2.872540  |
| 22 | 6 | 2.865559  | -1.482665 | 0.314968  |
| 23 | 6 | 3.870711  | -5.412768 | -0.508057 |
| 24 | 6 | 1.861829  | -3.749423 | -2.148222 |
| 25 | 6 | 1.217874  | -4.437897 | 0.749893  |
| 26 | 6 | 2.399140  | -1.156208 | 1.528411  |
| 27 | 6 | 3.210862  | 1.893039  | -0.345498 |
| 28 | 6 | 5.271944  | 2.868999  | -0.968425 |
| 29 | 6 | 4.849445  | 4.113460  | -1.722518 |
| 30 | 6 | 2.583803  | -2.066283 | 2.714327  |
| 31 | 1 | -6.227746 | 0.685165  | 1.048649  |
| 32 | 1 | -5.156838 | -3.287149 | -1.817422 |
| 33 | 1 | -7.501357 | -2.785589 | -1.172535 |
| 34 | 1 | -8.033937 | -0.830089 | 0.240603  |
| 35 | 1 | -3.899020 | 2.220624  | 1.001409  |
| 36 | 1 | -3.498761 | 1.066378  | 2.307544  |
| 37 | 1 | -0.046851 | 3.549318  | 1.740979  |
| 38 | 1 | -2.838499 | 2.495785  | -1.342282 |
| 39 | 1 | 0.459278  | 5.690688  | 0.541073  |
| 40 | 1 | -2.326450 | 4.594501  | -2.544150 |
| 41 | 1 | -0.680291 | 6.197890  | -1.605526 |
| 42 | 1 | -1.157393 | 1.615915  | 2.002637  |
| 43 | 1 | 0.817616  | 1.765298  | 0.669691  |
| 44 | 1 | 2.456406  | 0.923594  | 2.079645  |
| 45 | 1 | 2.321634  | -1.106411 | -1.700258 |
| 46 | 1 | 3.889315  | -0.472369 | -1.240668 |
| 47 | 1 | 1.755598  | 1.113167  | -1.606180 |
| 48 | 1 | -0.130649 | -0.578801 | 2.582923  |
| 49 | 1 | 1.115605  | -0.231514 | 3.779228  |
| 50 | 1 | 4.677316  | -5.177298 | -1.211103 |
| 51 | 1 | 4.321351  | -5.573112 | 0.477730  |
| 52 | 1 | 3.414634  | -6.357288 | -0.826061 |
| 53 | 1 | 1.074455  | -2.988408 | -2.113066 |
| 54 | 1 | 2.617940  | -3.432586 | -2.875124 |
| 55 | 1 | 1.411206  | -4.678312 | -2.519773 |
| 56 | 1 | 1.591460  | -4.787852 | 1.717713  |
| 57 | 1 | 0.585619  | -3.558775 | 0.921620  |
| 58 | 1 | 0.581004  | -5.226826 | 0.331078  |
| 59 | 1 | 6.193696  | 2.449133  | -1.374722 |
| 60 | 1 | 5.409603  | 3.071458  | 0.096224  |
| 61 | 1 | 5.631448  | 4.874799  | -1.642936 |

|    |    |           |           |           |
|----|----|-----------|-----------|-----------|
| 62 | 1  | 4.694576  | 3.886942  | -2.781374 |
| 63 | 1  | 3.924444  | 4.522439  | -1.307928 |
| 64 | 1  | 1.626051  | -2.422784 | 3.111963  |
| 65 | 1  | 3.192802  | -2.934670 | 2.453499  |
| 66 | 1  | 3.084016  | -1.531038 | 3.531062  |
| 67 | 8  | 0.014608  | -1.042492 | -0.748311 |
| 68 | 8  | 3.477414  | -2.695739 | 0.064649  |
| 69 | 8  | 3.030762  | 2.779285  | 0.459255  |
| 70 | 8  | 4.299563  | 1.816388  | -1.120595 |
| 71 | 8  | 0.129803  | 1.442135  | 3.076848  |
| 72 | 7  | -3.544143 | 0.233400  | 0.387335  |
| 73 | 7  | -1.339360 | 0.422569  | 0.264840  |
| 74 | 16 | -2.643150 | -1.698914 | -1.039993 |
| 75 | 14 | 2.601458  | -4.042532 | -0.450215 |

Transition state 1 (TS1):

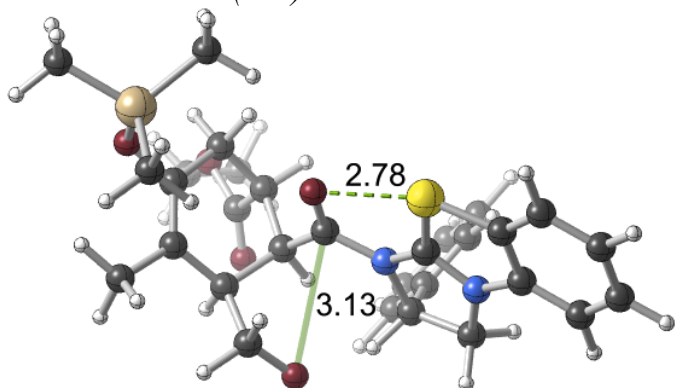

Charge = 0 Multiplicity = 1

HF = -2337.4913425 hartrees (-1466799.19233217 kcal/mol)

Imaginary Frequencies: 1 (-35.2145 1/cm)

Zero-point correction = 0.618310 (Hartree/Particle)

Temperature 298.150 Kelvin. Pressure 1.00000 Atm.

Sum of electronic and thermal Free Energies =

-2336.944226 hartrees (-1466455.87125726 kcal/mol)

Coordinates (from last standard orientation):

| Center Number | Atomic Number | Coordinates (Angstroms) |           |          |
|---------------|---------------|-------------------------|-----------|----------|
|               |               | X                       | Y         | Z        |
| 1             | 6             | -6.146219               | -0.404688 | 0.323547 |
| 2             | 6             | -4.815842               | -0.705446 | 0.048141 |

|    |   |           |           |           |
|----|---|-----------|-----------|-----------|
| 3  | 6 | -4.448286 | -1.872356 | -0.633785 |
| 4  | 6 | -5.414148 | -2.776074 | -1.063866 |
| 5  | 6 | -6.746214 | -2.479069 | -0.794526 |
| 6  | 6 | -7.105445 | -1.311485 | -0.108751 |
| 7  | 6 | -2.541898 | -0.479128 | -0.013883 |
| 8  | 6 | -3.494051 | 1.288719  | 1.132836  |
| 9  | 6 | -1.963505 | 1.538497  | 0.994851  |
| 10 | 6 | -1.621100 | 2.767572  | 0.184867  |
| 11 | 6 | -0.794078 | 3.743952  | 0.741364  |
| 12 | 6 | -2.111918 | 2.940244  | -1.112958 |
| 13 | 6 | -0.459416 | 4.882530  | 0.009806  |
| 14 | 6 | -1.779178 | 4.076454  | -1.843998 |
| 15 | 6 | -0.951260 | 5.049585  | -1.282383 |
| 16 | 6 | -0.171891 | -0.181717 | 0.136614  |
| 17 | 6 | 0.945132  | 0.708914  | 0.619580  |
| 18 | 6 | 1.918654  | 0.983492  | -0.536323 |
| 19 | 6 | 1.657393  | 0.096491  | 1.843617  |
| 20 | 6 | 2.681907  | -0.279803 | -0.954084 |
| 21 | 6 | 0.569623  | -0.294226 | 2.896976  |
| 22 | 6 | 3.044623  | -1.164751 | 0.206809  |
| 23 | 6 | 4.900354  | -4.680752 | -0.950783 |
| 24 | 6 | 2.364197  | -3.512917 | -2.259362 |
| 25 | 6 | 2.245141  | -4.452585 | 0.632622  |
| 26 | 6 | 2.626415  | -1.001335 | 1.470058  |
| 27 | 6 | 2.817628  | 2.152146  | -0.151896 |
| 28 | 6 | 4.721989  | 3.408544  | -0.768494 |
| 29 | 6 | 4.116866  | 4.664935  | -1.362369 |
| 30 | 6 | 3.133406  | -1.872255 | 2.588971  |
| 31 | 1 | -6.411443 | 0.501488  | 0.858031  |
| 32 | 1 | -5.137582 | -3.680806 | -1.595397 |
| 33 | 1 | -7.518393 | -3.166727 | -1.122881 |
| 34 | 1 | -8.152598 | -1.108671 | 0.089742  |
| 35 | 1 | -4.090151 | 2.090698  | 0.693254  |
| 36 | 1 | -3.794925 | 1.120034  | 2.168965  |
| 37 | 1 | -0.398604 | 3.595243  | 1.743728  |
| 38 | 1 | -2.757908 | 2.183520  | -1.555548 |
| 39 | 1 | 0.192072  | 5.632160  | 0.448977  |
| 40 | 1 | -2.163993 | 4.203087  | -2.851491 |
| 41 | 1 | -0.689655 | 5.934808  | -1.854380 |
| 42 | 1 | -1.443853 | 1.507223  | 1.970441  |
| 43 | 1 | 0.521943  | 1.646898  | 0.963119  |
| 44 | 1 | 2.212142  | 0.929324  | 2.301461  |
| 45 | 1 | 2.068824  | -0.851080 | -1.659010 |
| 46 | 1 | 3.600073  | -0.009218 | -1.485106 |
| 47 | 1 | 1.361538  | 1.357480  | -1.408614 |
| 48 | 1 | 0.110468  | -1.254535 | 2.503640  |

|    |    |           |           |           |
|----|----|-----------|-----------|-----------|
| 49 | 1  | 1.138005  | -0.639185 | 3.800242  |
| 50 | 1  | 5.528962  | -4.226299 | -1.724559 |
| 51 | 1  | 5.494602  | -4.750736 | -0.033048 |
| 52 | 1  | 4.657866  | -5.700497 | -1.270913 |
| 53 | 1  | 1.404163  | -3.013840 | -2.085420 |
| 54 | 1  | 2.910135  | -2.953287 | -3.026979 |
| 55 | 1  | 2.148807  | -4.509272 | -2.665496 |
| 56 | 1  | 2.795479  | -4.722108 | 1.539806  |
| 57 | 1  | 1.437287  | -3.765448 | 0.910975  |
| 58 | 1  | 1.782670  | -5.365115 | 0.236692  |
| 59 | 1  | 5.654789  | 3.141560  | -1.268174 |
| 60 | 1  | 4.906447  | 3.517923  | 0.302710  |
| 61 | 1  | 4.815958  | 5.498852  | -1.247437 |
| 62 | 1  | 3.916435  | 4.526488  | -2.428774 |
| 63 | 1  | 3.183523  | 4.923032  | -0.855353 |
| 64 | 1  | 2.334459  | -2.488344 | 3.018791  |
| 65 | 1  | 3.931555  | -2.534884 | 2.246218  |
| 66 | 1  | 3.526111  | -1.252551 | 3.405424  |
| 67 | 8  | -0.035630 | -1.258640 | -0.415075 |
| 68 | 8  | 3.912677  | -2.178567 | -0.153172 |
| 69 | 8  | 2.593691  | 2.927692  | 0.750299  |
| 70 | 8  | 3.863194  | 2.271063  | -0.978923 |
| 71 | 8  | -0.296734 | 0.701158  | 3.140112  |
| 72 | 7  | -3.692653 | 0.047423  | 0.371805  |
| 73 | 7  | -1.491121 | 0.283290  | 0.313694  |
| 74 | 16 | -2.688493 | -1.988285 | -0.823806 |
| 75 | 14 | 3.346874  | -3.680159 | -0.670453 |

*Intermediate (INT):*

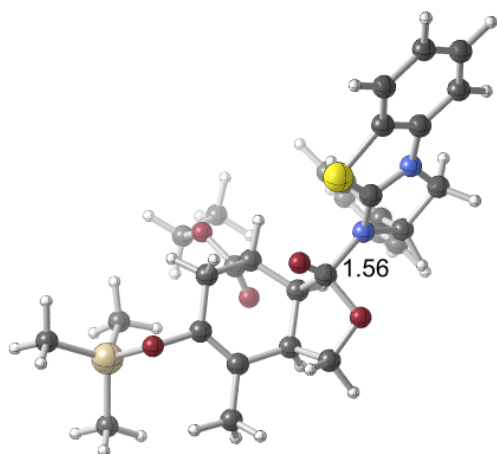

Charge = 0 Multiplicity = 1

HF = -2337.538113 hartrees (-1466828.54128863 kcal/mol)

Imaginary Frequencies: none found

Zero-point correction = 0.620198 (Hartree/Particle)

Temperature 298.150 Kelvin. Pressure 1.00000 Atm.

Sum of electronic and thermal Free Energies =

-2336.989327 hartrees (-1466484.17258577 kcal/mol)

Coordinates (from last standard orientation):

| Center<br>Number | Atomic<br>Number | Coordinates (Angstroms) |           |           |
|------------------|------------------|-------------------------|-----------|-----------|
|                  |                  | X                       | Y         | Z         |
| 1                | 6                | -6.479053               | -0.363877 | -0.504460 |
| 2                | 6                | -5.155782               | -0.778067 | -0.408817 |
| 3                | 6                | -4.698509               | -1.941439 | -1.043627 |
| 4                | 6                | -5.570834               | -2.716916 | -1.795994 |
| 5                | 6                | -6.899702               | -2.307360 | -1.901403 |
| 6                | 6                | -7.346140               | -1.148062 | -1.261783 |
| 7                | 6                | -2.937311               | -0.786963 | 0.215012  |
| 8                | 6                | -4.050914               | 0.975362  | 1.201955  |
| 9                | 6                | -2.514667               | 1.047156  | 1.503908  |
| 10               | 6                | -1.885110               | 2.308496  | 0.949769  |
| 11               | 6                | -1.518130               | 3.341058  | 1.811291  |
| 12               | 6                | -1.700893               | 2.462306  | -0.427418 |
| 13               | 6                | -0.973046               | 4.519978  | 1.303642  |
| 14               | 6                | -1.152954               | 3.636245  | -0.934039 |
| 15               | 6                | -0.790376               | 4.669256  | -0.068411 |
| 16               | 6                | -0.633981               | -0.920126 | 1.116109  |
| 17               | 6                | 0.553654                | 0.069796  | 1.004597  |
| 18               | 6                | 1.091710                | 0.209269  | -0.412931 |
| 19               | 6                | 1.547013                | -0.477619 | 2.049392  |
| 20               | 6                | 1.915057                | -1.013961 | -0.854230 |
| 21               | 6                | 0.634962                | -1.383942 | 2.935791  |
| 22               | 6                | 2.892026                | -1.458681 | 0.200969  |
| 23               | 6                | 2.735100                | -1.235748 | 1.510897  |
| 24               | 6                | 1.943051                | 1.459395  | -0.534469 |
| 25               | 6                | 3.035161                | 2.895830  | -2.072149 |
| 26               | 6                | 2.303923                | 4.215397  | -1.930182 |
| 27               | 6                | 3.695494                | -1.741576 | 2.551950  |
| 28               | 1                | -6.814943               | 0.538861  | -0.003994 |
| 29               | 1                | -5.227037               | -3.620966 | -2.289661 |
| 30               | 1                | -7.593790               | -2.900858 | -2.487429 |
| 31               | 1                | -8.385570               | -0.849807 | -1.353918 |
| 32               | 1                | -4.415804               | 1.884795  | 0.720531  |

|    |    |           |           |           |
|----|----|-----------|-----------|-----------|
| 33 | 1  | -4.645111 | 0.763957  | 2.094335  |
| 34 | 1  | -1.652300 | 3.217714  | 2.883322  |
| 35 | 1  | -1.979498 | 1.657332  | -1.104277 |
| 36 | 1  | -0.685627 | 5.317724  | 1.981964  |
| 37 | 1  | -1.010904 | 3.746791  | -2.005204 |
| 38 | 1  | -0.363286 | 5.585618  | -0.465290 |
| 39 | 1  | -2.324538 | 0.976466  | 2.577628  |
| 40 | 1  | 0.224812  | 1.052670  | 1.350196  |
| 41 | 1  | 1.928140  | 0.350987  | 2.658113  |
| 42 | 1  | 1.218135  | -1.830609 | -1.062762 |
| 43 | 1  | 2.458953  | -0.787245 | -1.777924 |
| 44 | 1  | 0.253649  | 0.323816  | -1.112710 |
| 45 | 1  | 0.863978  | -2.442701 | 2.750932  |
| 46 | 1  | 0.739582  | -1.181381 | 4.005529  |
| 47 | 1  | 3.387012  | 2.744612  | -3.094872 |
| 48 | 1  | 3.889186  | 2.843849  | -1.392346 |
| 49 | 1  | 2.975726  | 5.036586  | -2.199453 |
| 50 | 1  | 1.434826  | 4.249478  | -2.594039 |
| 51 | 1  | 1.970899  | 4.362017  | -0.899842 |
| 52 | 1  | 3.159967  | -2.291408 | 3.337057  |
| 53 | 1  | 4.446063  | -2.410666 | 2.126535  |
| 54 | 1  | 4.212013  | -0.909883 | 3.049617  |
| 55 | 8  | -0.609508 | -1.981463 | 0.402790  |
| 56 | 8  | 3.933628  | -2.215923 | -0.295667 |
| 57 | 8  | 2.400163  | 2.091377  | 0.392847  |
| 58 | 8  | 2.165992  | 1.776964  | -1.820528 |
| 59 | 8  | -0.700308 | -1.105608 | 2.560112  |
| 60 | 7  | -4.120560 | -0.159600 | 0.281393  |
| 61 | 7  | -1.979677 | -0.176955 | 0.861909  |
| 62 | 16 | -2.970543 | -2.247248 | -0.715359 |
| 63 | 14 | 5.399262  | -1.544740 | -0.789709 |
| 64 | 6  | 6.628013  | -1.532991 | 0.625009  |
| 65 | 1  | 6.763798  | -2.528977 | 1.060660  |
| 66 | 1  | 7.605925  | -1.193792 | 0.260928  |
| 67 | 1  | 6.318841  | -0.850316 | 1.424239  |
| 68 | 6  | 5.115949  | 0.220927  | -1.350680 |
| 69 | 1  | 4.517656  | 0.284346  | -2.265738 |
| 70 | 1  | 4.600288  | 0.781085  | -0.560319 |
| 71 | 1  | 6.074513  | 0.720258  | -1.536511 |
| 72 | 6  | 6.009495  | -2.651106 | -2.167326 |
| 73 | 1  | 6.138989  | -3.680141 | -1.813513 |
| 74 | 1  | 5.300847  | -2.670493 | -3.002341 |
| 75 | 1  | 6.976311  | -2.306504 | -2.551558 |

Transition state 2 (TS2):

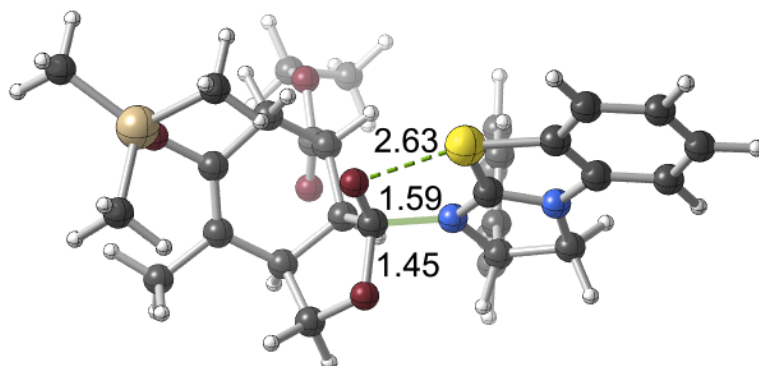

Charge = 0 Multiplicity = 1

HF = -2337.5363814 hartrees (-1466827.45469231 kcal/mol)

Imaginary Frequencies: 1 (-68.3179 1/cm)

Zero-point correction = 0.620500 (Hartree/Particle)

Temperature 298.150 Kelvin. Pressure 1.00000 Atm.

Sum of electronic and thermal Free Energies =

-2336.985617 hartrees (-1466481.84452367 kcal/mol)

Coordinates (from last standard orientation):

| Center Number | Atomic Number | Coordinates (Angstroms) |           |           |
|---------------|---------------|-------------------------|-----------|-----------|
|               |               | X                       | Y         | Z         |
| 1             | 6             | -6.047029               | -1.154876 | -0.169147 |
| 2             | 6             | -4.664551               | -1.298872 | -0.160507 |
| 3             | 6             | -4.034156               | -2.400960 | -0.755623 |
| 4             | 6             | -4.788129               | -3.386558 | -1.378351 |
| 5             | 6             | -6.176158               | -3.249557 | -1.394509 |
| 6             | 6             | -6.794740               | -2.148760 | -0.796334 |
| 7             | 6             | -2.445760               | -0.823978 | 0.258523  |
| 8             | 6             | -3.816653               | 0.772848  | 1.206275  |
| 9             | 6             | -2.305361               | 1.134665  | 1.409855  |
| 10            | 6             | -1.943923               | 2.463320  | 0.777634  |
| 11            | 6             | -1.661628               | 3.568087  | 1.580012  |
| 12            | 6             | -1.896421               | 2.592934  | -0.613349 |
| 13            | 6             | -1.334279               | 4.793227  | 1.000903  |
| 14            | 6             | -1.559468               | 3.812627  | -1.192430 |
| 15            | 6             | -1.281642               | 4.916828  | -0.385119 |
| 16            | 6             | -0.077056               | -0.473867 | 0.983728  |
| 17            | 6             | 0.838518                | 0.767416  | 0.846122  |

|    |   |           |           |           |
|----|---|-----------|-----------|-----------|
| 18 | 6 | 1.317930  | 1.009205  | -0.574689 |
| 19 | 6 | 1.942702  | 0.495820  | 1.868102  |
| 20 | 6 | 2.281467  | -0.089498 | -1.054758 |
| 21 | 6 | 1.134737  | -0.208413 | 2.986423  |
| 22 | 6 | 3.209842  | -0.581415 | 0.021440  |
| 23 | 6 | 5.581987  | -3.551170 | -1.597362 |
| 24 | 6 | 2.483277  | -3.478864 | -1.380241 |
| 25 | 6 | 4.163145  | -3.805451 | 1.123897  |
| 26 | 6 | 3.099196  | -0.316087 | 1.330080  |
| 27 | 6 | 1.951894  | 2.385272  | -0.682049 |
| 28 | 6 | 2.931866  | 3.932020  | -2.183814 |
| 29 | 6 | 1.955304  | 5.090583  | -2.186372 |
| 30 | 6 | 4.155350  | -0.711750 | 2.326865  |
| 31 | 1 | -6.518319 | -0.295862 | 0.297584  |
| 32 | 1 | -4.309270 | -4.243573 | -1.842231 |
| 33 | 1 | -6.780022 | -4.009974 | -1.878928 |
| 34 | 1 | -7.876345 | -2.062252 | -0.819058 |
| 35 | 1 | -4.353548 | 1.555947  | 0.666737  |
| 36 | 1 | -4.328142 | 0.556010  | 2.147176  |
| 37 | 1 | -1.686077 | 3.464296  | 2.662162  |
| 38 | 1 | -2.113114 | 1.733364  | -1.244472 |
| 39 | 1 | -1.110455 | 5.647151  | 1.633235  |
| 40 | 1 | -1.515843 | 3.903375  | -2.273904 |
| 41 | 1 | -1.019389 | 5.868419  | -0.838439 |
| 42 | 1 | -2.050045 | 1.148302  | 2.473287  |
| 43 | 1 | 0.296590  | 1.650582  | 1.193154  |
| 44 | 1 | 2.342163  | 1.439226  | 2.258554  |
| 45 | 1 | 1.686916  | -0.930858 | -1.416253 |
| 46 | 1 | 2.892265  | 0.274110  | -1.889007 |
| 47 | 1 | 0.453847  | 1.022609  | -1.252936 |
| 48 | 1 | 1.691348  | -1.029403 | 3.453220  |
| 49 | 1 | 0.869231  | 0.510298  | 3.773103  |
| 50 | 1 | 5.534995  | -3.132366 | -2.608537 |
| 51 | 1 | 6.521778  | -3.222794 | -1.139859 |
| 52 | 1 | 5.617722  | -4.642829 | -1.688041 |
| 53 | 1 | 1.642891  | -3.063283 | -0.808616 |
| 54 | 1 | 2.412693  | -3.115867 | -2.411678 |
| 55 | 1 | 2.372892  | -4.570175 | -1.402087 |
| 56 | 1 | 5.075104  | -3.555959 | 1.675854  |
| 57 | 1 | 3.299764  | -3.509060 | 1.729883  |
| 58 | 1 | 4.127088  | -4.896788 | 1.014278  |
| 59 | 1 | 3.408986  | 3.812010  | -3.158279 |
| 60 | 1 | 3.704544  | 4.065903  | -1.422683 |
| 61 | 1 | 2.483623  | 6.013751  | -2.444931 |
| 62 | 1 | 1.165685  | 4.927405  | -2.926251 |
| 63 | 1 | 1.502293  | 5.212859  | -1.199907 |



|    |    |           |           |           |
|----|----|-----------|-----------|-----------|
| 64 | 1  | 3.826689  | -1.512524 | 2.999743  |
| 65 | 1  | 5.067287  | -1.047766 | 1.827966  |
| 66 | 1  | 4.406245  | 0.149441  | 2.960547  |
| 67 | 8  | 0.099686  | -1.489337 | 0.231172  |
| 68 | 8  | 4.251818  | -1.336722 | -0.481117 |
| 69 | 8  | 2.161737  | 3.140665  | 0.241484  |
| 70 | 8  | 2.265701  | 2.677567  | -1.953596 |
| 71 | 8  | -0.062964 | -0.716199 | 2.412766  |
| 72 | 7  | -3.725361 | -0.439934 | 0.394853  |
| 73 | 7  | -1.582917 | 0.004001  | 0.779663  |
| 74 | 16 | -2.259514 | -2.334048 | -0.572537 |
| 75 | 14 | 4.108480  | -3.018133 | -0.575594 |

Product (complex with (S)-(-)-BTM catalyst):

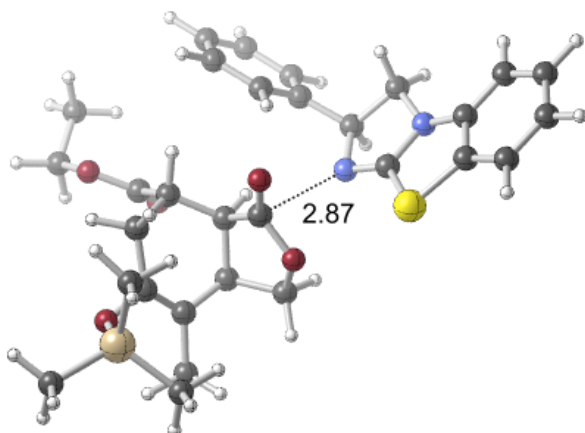

Charge = 0 Multiplicity = 1

HF = -2337.5729067 hartrees (-1466850.37468332 kcal/mol)

Imaginary Frequencies: none found

Zero-point correction = 0.619397 (Hartree/Particle)

Temperature 298.150 Kelvin. Pressure 1.00000 Atm.

Sum of electronic and thermal Free Energies =

-2337.028591 hartrees (-1466508.81113841 kcal/mol)

Coordinates (from last standard orientation):

| Center<br>Number | Atomic<br>Number | Coordinates (Angstroms) |           |           |
|------------------|------------------|-------------------------|-----------|-----------|
|                  |                  | X                       | Y         | Z         |
| 1                | 6                | -6.609039               | -0.841569 | -0.556118 |

|    |   |           |           |           |
|----|---|-----------|-----------|-----------|
| 2  | 6 | -5.303998 | -1.043766 | -0.119902 |
| 3  | 6 | -4.738211 | -2.330733 | -0.118905 |
| 4  | 6 | -5.473271 | -3.429588 | -0.534392 |
| 5  | 6 | -6.786947 | -3.229780 | -0.966310 |
| 6  | 6 | -7.341907 | -1.950454 | -0.979910 |
| 7  | 6 | -3.139739 | -0.551608 | 0.611211  |
| 8  | 6 | -4.353835 | 1.350324  | 0.239710  |
| 9  | 6 | -2.967425 | 1.616676  | 0.910741  |
| 10 | 6 | -2.196520 | 2.730496  | 0.239301  |
| 11 | 6 | -2.342236 | 4.043621  | 0.691005  |
| 12 | 6 | -1.366492 | 2.475315  | -0.856596 |
| 13 | 6 | -1.673935 | 5.090358  | 0.058635  |
| 14 | 6 | -0.686818 | 3.519996  | -1.481200 |
| 15 | 6 | -0.843592 | 4.830315  | -1.029540 |
| 16 | 6 | 0.206694  | -0.746820 | -0.146330 |
| 17 | 6 | 0.941705  | 0.414657  | 0.496266  |
| 18 | 6 | 1.901306  | 1.072330  | -0.477515 |
| 19 | 6 | 1.578622  | -0.232437 | 1.727856  |
| 20 | 6 | 2.990537  | 0.084979  | -0.909989 |
| 21 | 6 | 0.501711  | -1.284797 | 2.048016  |
| 22 | 6 | 3.502137  | -0.753725 | 0.233114  |
| 23 | 6 | 6.545275  | -3.290192 | -0.953121 |
| 24 | 6 | 3.794985  | -2.976352 | -2.332894 |
| 25 | 6 | 3.930796  | -4.161706 | 0.465700  |
| 26 | 6 | 2.921648  | -0.864575 | 1.438224  |
| 27 | 6 | 2.457696  | 2.345716  | 0.131666  |
| 28 | 6 | 3.875440  | 4.198055  | -0.256431 |
| 29 | 6 | 2.898419  | 5.320265  | -0.543862 |
| 30 | 6 | 3.567663  | -1.606085 | 2.576551  |
| 31 | 1 | -7.037019 | 0.156110  | -0.561084 |
| 32 | 1 | -5.034177 | -4.422713 | -0.533912 |
| 33 | 1 | -7.374564 | -4.080185 | -1.296303 |
| 34 | 1 | -8.361456 | -1.809760 | -1.325333 |
| 35 | 1 | -4.359001 | 1.634330  | -0.820182 |
| 36 | 1 | -5.174619 | 1.847864  | 0.758857  |
| 37 | 1 | -2.979427 | 4.247152  | 1.548911  |
| 38 | 1 | -1.238057 | 1.451478  | -1.203511 |
| 39 | 1 | -1.796032 | 6.106780  | 0.421393  |
| 40 | 1 | -0.036531 | 3.310837  | -2.326866 |
| 41 | 1 | -0.318111 | 5.643808  | -1.521329 |
| 42 | 1 | -3.133418 | 1.892747  | 1.960366  |
| 43 | 1 | 0.174155  | 1.124842  | 0.820833  |
| 44 | 1 | 1.665081  | 0.473813  | 2.559943  |
| 45 | 1 | 2.587835  | -0.565218 | -1.695805 |
| 46 | 1 | 3.840730  | 0.615572  | -1.350355 |
| 47 | 1 | 1.344622  | 1.384249  | -1.370518 |

|    |    |           |           |           |
|----|----|-----------|-----------|-----------|
| 48 | 1  | 0.869189  | -2.170616 | 2.567666  |
| 49 | 1  | -0.328799 | -0.841752 | 2.605906  |
| 50 | 1  | 6.992742  | -2.577661 | -1.654524 |
| 51 | 1  | 7.092002  | -3.220736 | -0.006453 |
| 52 | 1  | 6.697151  | -4.297889 | -1.356052 |
| 53 | 1  | 2.718329  | -2.829311 | -2.185122 |
| 54 | 1  | 4.152049  | -2.214275 | -3.034138 |
| 55 | 1  | 3.925666  | -3.955196 | -2.810652 |
| 56 | 1  | 4.480041  | -4.253426 | 1.408362  |
| 57 | 1  | 2.897912  | -3.872779 | 0.694457  |
| 58 | 1  | 3.897481  | -5.153044 | -0.002753 |
| 59 | 1  | 4.798717  | 4.312677  | -0.827157 |
| 60 | 1  | 4.116577  | 4.137863  | 0.807397  |
| 61 | 1  | 3.346836  | 6.280243  | -0.270318 |
| 62 | 1  | 2.648167  | 5.345158  | -1.608843 |
| 63 | 1  | 1.979536  | 5.188918  | 0.033908  |
| 64 | 1  | 3.067127  | -2.556330 | 2.797003  |
| 65 | 1  | 4.616479  | -1.822900 | 2.362186  |
| 66 | 1  | 3.518323  | -1.000943 | 3.490693  |
| 67 | 8  | -0.133479 | -0.865919 | -1.297642 |
| 68 | 8  | 4.692722  | -1.380032 | -0.051781 |
| 69 | 8  | 2.130719  | 2.802286  | 1.204072  |
| 70 | 8  | 3.339215  | 2.932249  | -0.686927 |
| 71 | 8  | 0.000479  | -1.714757 | 0.767022  |
| 72 | 7  | -4.422303 | -0.100148 | 0.371295  |
| 73 | 7  | -2.249027 | 0.319502  | 0.891026  |
| 74 | 16 | -3.045992 | -2.305189 | 0.430205  |
| 75 | 14 | 4.728457  | -2.939020 | -0.707431 |

*Product:*

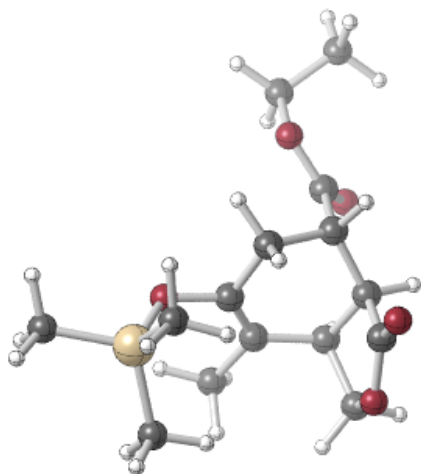

Charge = 0 Multiplicity = 1

HF = -1251.3380755 hartrees (-785227.155757005 kcal/mol)

Imaginary Frequencies: none found

Zero-point correction = 0.379846 (Hartree/Particle)

Temperature 298.150 Kelvin. Pressure 1.00000 Atm.

Sum of electronic and thermal Free Energies =

-1251.011171 hartrees (-785022.01991421 kcal/mol)

Coordinates (from last standard orientation):

| -----  |        |                         |           |           |
|--------|--------|-------------------------|-----------|-----------|
| Center | Atomic | Coordinates (Angstroms) |           |           |
| Number | Number | X                       | Y         | Z         |
| -----  |        |                         |           |           |
| 1      | 6      | -0.234363               | 2.455680  | 1.143848  |
| 2      | 6      | -1.243317               | 1.718590  | 0.277881  |
| 3      | 6      | -1.572626               | 0.347160  | 0.847760  |
| 4      | 6      | -0.553424               | 1.699640  | -1.088502 |
| 5      | 6      | -0.297427               | -0.494236 | 0.949640  |
| 6      | 6      | 0.210481                | 3.033536  | -1.018954 |
| 7      | 6      | 0.534505                | -0.403906 | -0.303875 |
| 8      | 6      | 3.827389                | -2.906264 | -0.226399 |
| 9      | 6      | 2.943914                | -1.022383 | 2.049040  |
| 10     | 6      | 3.890031                | 0.170564  | -0.599543 |
| 11     | 6      | 0.388856                | 0.527719  | -1.259914 |
| 12     | 6      | -2.636004               | -0.319091 | -0.009290 |
| 13     | 6      | -3.888147               | -2.299621 | -0.328823 |
| 14     | 6      | -5.265164               | -1.928031 | 0.181878  |
| 15     | 6      | 1.149071                | 0.473524  | -2.557191 |
| 16     | 1      | -2.144696               | 2.341722  | 0.225236  |
| 17     | 1      | -1.274922               | 1.727207  | -1.910573 |
| 18     | 1      | 0.282357                | -0.159895 | 1.818217  |
| 19     | 1      | -0.543473               | -1.546155 | 1.121897  |
| 20     | 1      | -2.002979               | 0.458929  | 1.850309  |
| 21     | 1      | 1.126691                | 3.065323  | -1.609481 |
| 22     | 1      | -0.431029               | 3.876221  | -1.295336 |
| 23     | 1      | 3.307430                | -3.742963 | 0.252749  |
| 24     | 1      | 3.829233                | -3.083785 | -1.307318 |
| 25     | 1      | 4.867707                | -2.917390 | 0.117705  |
| 26     | 1      | 2.558360                | -0.031386 | 2.314998  |
| 27     | 1      | 2.320107                | -1.776785 | 2.541271  |
| 28     | 1      | 3.954153                | -1.102251 | 2.469413  |
| 29     | 1      | 4.035622                | 0.025416  | -1.674995 |
| 30     | 1      | 3.331867                | 1.102450  | -0.448337 |
| 31     | 1      | 4.878251                | 0.302406  | -0.142245 |
| 32     | 1      | -3.661510               | -3.350029 | -0.139009 |

|    |    |           |           |           |
|----|----|-----------|-----------|-----------|
| 33 | 1  | -3.785755 | -2.097126 | -1.397322 |
| 34 | 1  | -6.021671 | -2.532901 | -0.327184 |
| 35 | 1  | -5.338933 | -2.115488 | 1.256911  |
| 36 | 1  | -5.478752 | -0.873686 | -0.011507 |
| 37 | 1  | 1.947642  | 1.223171  | -2.608621 |
| 38 | 1  | 1.601344  | -0.509118 | -2.708579 |
| 39 | 1  | 0.469642  | 0.673844  | -3.395129 |
| 40 | 8  | -0.128124 | 2.428935  | 2.343752  |
| 41 | 8  | 1.445039  | -1.424365 | -0.429723 |
| 42 | 8  | -3.229579 | 0.220223  | -0.916923 |
| 43 | 8  | -2.862374 | -1.576961 | 0.381022  |
| 44 | 8  | 0.585097  | 3.185256  | 0.365511  |
| 45 | 14 | 3.012156  | -1.281409 | 0.193749  |

*Lactonization step after deprotonation of the alcohol moiety (exo):*

*Reactant:*

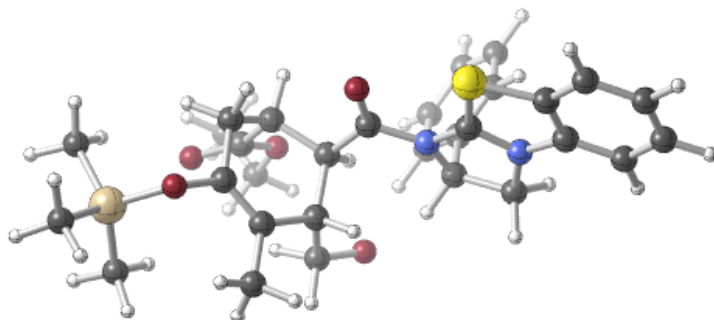

Charge = 0 Multiplicity = 1

HF = -2337.5006474 hartrees (-1466805.03124997 kcal/mol)

Imaginary Frequencies: none found

Zero-point correction = 0.619244 (Hartree/Particle)

Temperature 298.150 Kelvin. Pressure 1.00000 Atm.

Sum of electronic and thermal Free Energies =

-2336.952449 hartrees (-1466461.03127199 kcal/mol)

Coordinates (from last standard orientation):

| Center Number | Atomic Number | Coordinates (Angstroms) |           |          |
|---------------|---------------|-------------------------|-----------|----------|
|               |               | X                       | Y         | Z        |
| 1             | 6             | -6.217158               | -1.195309 | 1.117640 |
| 2             | 6             | -5.022971               | -1.289583 | 0.410748 |

|    |   |           |           |           |
|----|---|-----------|-----------|-----------|
| 3  | 6 | -4.849840 | -2.216115 | -0.625916 |
| 4  | 6 | -5.878938 | -3.080307 | -0.983962 |
| 5  | 6 | -7.075688 | -2.990030 | -0.280350 |
| 6  | 6 | -7.241183 | -2.060803 | 0.754624  |
| 7  | 6 | -2.871293 | -0.847482 | -0.220847 |
| 8  | 6 | -3.449092 | 0.467361  | 1.585607  |
| 9  | 6 | -2.108278 | 0.979470  | 0.994426  |
| 10 | 6 | -2.227786 | 2.303536  | 0.264979  |
| 11 | 6 | -1.300384 | 3.312774  | 0.535667  |
| 12 | 6 | -3.241507 | 2.521869  | -0.674646 |
| 13 | 6 | -1.394050 | 4.533737  | -0.133751 |
| 14 | 6 | -3.329362 | 3.740842  | -1.338762 |
| 15 | 6 | -2.403665 | 4.749540  | -1.068287 |
| 16 | 6 | -0.562460 | -0.353395 | -0.675737 |
| 17 | 6 | 1.746914  | 0.533061  | -1.129340 |
| 18 | 6 | 0.617886  | 0.360282  | -0.102551 |
| 19 | 6 | 1.069479  | -0.366586 | 1.191701  |
| 20 | 6 | 2.464492  | -0.772482 | -1.444379 |
| 21 | 6 | 2.155409  | -1.392476 | 0.979482  |
| 22 | 6 | 2.784725  | -1.547056 | -0.194562 |
| 23 | 6 | 1.406224  | 0.732031  | 2.270720  |
| 24 | 6 | 6.031598  | -1.152944 | -1.617121 |
| 25 | 6 | 6.178086  | -3.908136 | -0.256277 |
| 26 | 6 | 5.727309  | -1.343770 | 1.420013  |
| 27 | 6 | 2.502682  | -2.238952 | 2.176944  |
| 28 | 6 | 2.736505  | 1.567823  | -0.606056 |
| 29 | 6 | 2.908235  | 3.705851  | 0.389045  |
| 30 | 6 | 3.580971  | 4.598378  | -0.633702 |
| 31 | 1 | -6.331666 | -0.470862 | 1.917207  |
| 32 | 1 | -5.752979 | -3.802798 | -1.783710 |
| 33 | 1 | -7.894357 | -3.652364 | -0.540838 |
| 34 | 1 | -8.186261 | -2.014279 | 1.285400  |
| 35 | 1 | -4.196132 | 1.258260  | 1.665215  |
| 36 | 1 | -3.322462 | -0.031937 | 2.549338  |
| 37 | 1 | -0.505072 | 3.099897  | 1.254265  |
| 38 | 1 | -3.969384 | 1.740995  | -0.891718 |
| 39 | 1 | -0.671588 | 5.318337  | 0.073596  |
| 40 | 1 | -4.117265 | 3.903984  | -2.067959 |
| 41 | 1 | -2.472402 | 5.701006  | -1.587734 |
| 42 | 1 | -1.295156 | 1.046047  | 1.744303  |
| 43 | 1 | 1.319907  | 0.960920  | -2.045658 |
| 44 | 1 | 0.288032  | 1.345523  | 0.241357  |
| 45 | 1 | 0.195115  | -0.889556 | 1.612453  |
| 46 | 1 | 3.394958  | -0.556297 | -1.977746 |
| 47 | 1 | 1.845570  | -1.387029 | -2.106540 |
| 48 | 1 | 1.663611  | 0.145729  | 3.189863  |

|    |    |           |           |           |
|----|----|-----------|-----------|-----------|
| 49 | 1  | 2.392333  | 1.170307  | 1.950808  |
| 50 | 1  | 7.126140  | -1.090218 | -1.572934 |
| 51 | 1  | 5.761909  | -1.572065 | -2.593095 |
| 52 | 1  | 5.633139  | -0.134822 | -1.552311 |
| 53 | 1  | 5.764754  | -4.557192 | 0.523683  |
| 54 | 1  | 6.009651  | -4.395141 | -1.223207 |
| 55 | 1  | 7.261127  | -3.844718 | -0.100095 |
| 56 | 1  | 6.780903  | -1.044170 | 1.475696  |
| 57 | 1  | 5.119190  | -0.435183 | 1.502375  |
| 58 | 1  | 5.512704  | -1.983859 | 2.281999  |
| 59 | 1  | 3.099900  | -1.681978 | 2.908836  |
| 60 | 1  | 1.590310  | -2.561946 | 2.694160  |
| 61 | 1  | 3.067993  | -3.128264 | 1.886579  |
| 62 | 1  | 3.638902  | 3.217063  | 1.038453  |
| 63 | 1  | 2.200086  | 4.261087  | 1.007163  |
| 64 | 1  | 2.837192  | 5.053268  | -1.294777 |
| 65 | 1  | 4.127230  | 5.398777  | -0.125349 |
| 66 | 1  | 4.288359  | 4.025238  | -1.239111 |
| 67 | 8  | -0.581652 | -1.142100 | -1.600585 |
| 68 | 8  | 3.745639  | -2.517946 | -0.375652 |
| 69 | 8  | 0.415131  | 1.620505  | 2.439210  |
| 70 | 8  | 2.113168  | 2.695301  | -0.253093 |
| 71 | 8  | 3.936158  | 1.412712  | -0.532177 |
| 72 | 7  | -3.869435 | -0.532571 | 0.589955  |
| 73 | 7  | -1.775899 | -0.116094 | 0.011528  |
| 74 | 16 | -3.230274 | -2.098385 | -1.342318 |
| 75 | 14 | 5.396337  | -2.210821 | -0.206213 |

*Transition state 1 (TS1):*

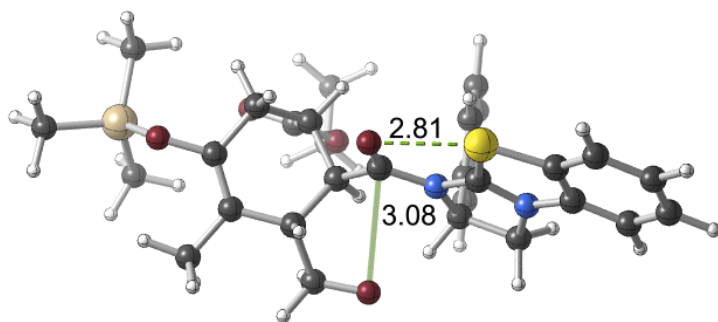

Charge = 0 Multiplicity = 1

HF = -2337.488541 hartrees (-1466797.43436291 kcal/mol)

Imaginary Frequencies: 1 (-29.8405 1/cm)

Zero-point correction = 0.618136 (Hartree/Particle)

Temperature 298.150 Kelvin. Pressure 1.00000 Atm.

Sum of electronic and thermal Free Energies =

-2336.939655 hartrees (-1466453.00290905 kcal/mol)

Coordinates (from last standard orientation):

| Center<br>Number | Atomic<br>Number | Coordinates (Angstroms) |           |           |
|------------------|------------------|-------------------------|-----------|-----------|
|                  |                  | X                       | Y         | Z         |
| 1                | 6                | -6.635519               | -0.204335 | 0.538661  |
| 2                | 6                | -5.403450               | -0.659264 | 0.078131  |
| 3                | 6                | -5.304287               | -1.702411 | -0.851899 |
| 4                | 6                | -6.445561               | -2.317307 | -1.355153 |
| 5                | 6                | -7.679647               | -1.862727 | -0.902045 |
| 6                | 6                | -7.771610               | -0.822732 | 0.031990  |
| 7                | 6                | -3.137028               | -0.829928 | -0.156373 |
| 8                | 6                | -3.649492               | 0.755318  | 1.440928  |
| 9                | 6                | -2.127186               | 0.816958  | 1.123413  |
| 10               | 6                | -1.723613               | 2.105360  | 0.443416  |
| 11               | 6                | -1.368661               | 3.189507  | 1.249916  |
| 12               | 6                | -1.726064               | 2.255741  | -0.944258 |
| 13               | 6                | -1.037326               | 4.413959  | 0.676872  |
| 14               | 6                | -1.381828               | 3.477681  | -1.518489 |
| 15               | 6                | -1.042521               | 4.560379  | -0.709993 |
| 16               | 6                | -0.743915               | -0.974428 | -0.172949 |
| 17               | 6                | 1.447203                | -0.023779 | -0.863839 |
| 18               | 6                | 0.544843                | -0.395972 | 0.338328  |
| 19               | 6                | 1.178898                | -1.399732 | 1.353857  |
| 20               | 6                | 2.322721                | -1.188154 | -1.314880 |
| 21               | 6                | 2.635407                | -1.731482 | 1.095350  |
| 22               | 6                | 3.133875                | -1.686830 | -0.147670 |
| 23               | 6                | 0.817266                | -0.849579 | 2.764158  |
| 24               | 6                | 5.956169                | -0.336528 | -2.147451 |
| 25               | 6                | 7.159725                | -2.547146 | -0.439350 |
| 26               | 6                | 5.902556                | -0.111531 | 0.965000  |
| 27               | 6                | 3.436309                | -2.269812 | 2.250701  |
| 28               | 6                | 2.328517                | 1.172862  | -0.525703 |
| 29               | 6                | 2.367087                | 3.380936  | 0.311177  |
| 30               | 6                | 2.659646                | 4.207064  | -0.924627 |
| 31               | 1                | -6.694009               | 0.600917  | 1.263725  |
| 32               | 1                | -6.373864               | -3.125165 | -2.076288 |
| 33               | 1                | -8.585650               | -2.323804 | -1.280832 |
| 34               | 1                | -8.748273               | -0.491946 | 0.369143  |
| 35               | 1                | -4.140155               | 1.721842  | 1.319495  |
| 36               | 1                | -3.855175               | 0.345845  | 2.432977  |
| 37               | 1                | -1.350711               | 3.067579  | 2.330485  |



|    |    |           |           |           |
|----|----|-----------|-----------|-----------|
| 38 | 1  | -1.989063 | 1.417664  | -1.585296 |
| 39 | 1  | -0.766014 | 5.252388  | 1.312021  |
| 40 | 1  | -1.383783 | 3.584683  | -2.599314 |
| 41 | 1  | -0.780503 | 5.514246  | -1.158780 |
| 42 | 1  | -1.507110 | 0.584490  | 2.014953  |
| 43 | 1  | 0.811007  | 0.320541  | -1.691383 |
| 44 | 1  | 0.318534  | 0.516644  | 0.888529  |
| 45 | 1  | 0.622214  | -2.347538 | 1.278035  |
| 46 | 1  | 2.996935  | -0.864779 | -2.113176 |
| 47 | 1  | 1.683340  | -1.983551 | -1.716332 |
| 48 | 1  | 1.244177  | -1.569228 | 3.507368  |
| 49 | 1  | 1.455981  | 0.076189  | 2.886262  |
| 50 | 1  | 6.955565  | 0.106829  | -2.240407 |
| 51 | 1  | 5.822402  | -1.023670 | -2.991331 |
| 52 | 1  | 5.218666  | 0.465872  | -2.229788 |
| 53 | 1  | 7.114423  | -3.114222 | 0.497260  |
| 54 | 1  | 7.079374  | -3.260391 | -1.267398 |
| 55 | 1  | 8.149857  | -2.079990 | -0.499934 |
| 56 | 1  | 6.622020  | 0.696838  | 0.788630  |
| 57 | 1  | 4.928549  | 0.347389  | 1.162549  |
| 58 | 1  | 6.220076  | -0.654714 | 1.862077  |
| 59 | 1  | 3.594899  | -1.507431 | 3.023120  |
| 60 | 1  | 2.912150  | -3.103731 | 2.734740  |
| 61 | 1  | 4.412698  | -2.630449 | 1.917905  |
| 62 | 1  | 3.286999  | 3.092004  | 0.826300  |
| 63 | 1  | 1.719224  | 3.916051  | 1.006915  |
| 64 | 1  | 1.732248  | 4.448751  | -1.452037 |
| 65 | 1  | 3.146857  | 5.142801  | -0.633632 |
| 66 | 1  | 3.324426  | 3.667516  | -1.603795 |
| 67 | 8  | -0.825081 | -1.926113 | -0.928619 |
| 68 | 8  | 4.386053  | -2.156961 | -0.458897 |
| 69 | 8  | -0.509371 | -0.661282 | 2.885615  |
| 70 | 8  | 1.627190  | 2.189410  | -0.017821 |
| 71 | 8  | 3.522505  | 1.224613  | -0.727962 |
| 72 | 7  | -4.139910 | -0.196297 | 0.431227  |
| 73 | 7  | -1.943299 | -0.356969 | 0.222377  |
| 74 | 16 | -3.613942 | -2.079621 | -1.233093 |
| 75 | 14 | 5.808699  | -1.253538 | -0.519310 |

Transition state 2 (TS2):

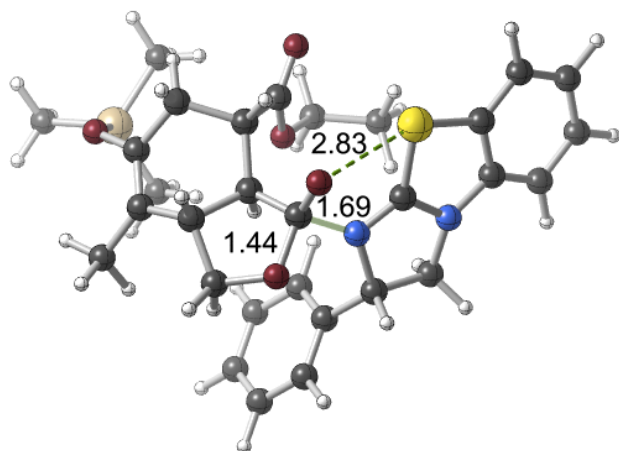

Charge = 0 Multiplicity = 1

HF = -2337.5310651 hartrees (-1466824.1186609 kcal/mol)

Imaginary Frequencies: 1 (-59.0535 1/cm)

Zero-point correction = 0.619255 (Hartree/Particle)

Temperature 298.150 Kelvin. Pressure 1.00000 Atm.

Sum of electronic and thermal Free Energies =

-2336.979383 hartrees (-1466477.93262633 kcal/mol)

Coordinates (from last standard orientation):

| Center Number | Atomic Number | Coordinates (Angstroms) |           |           |
|---------------|---------------|-------------------------|-----------|-----------|
|               |               | X                       | Y         | Z         |
| 1             | 6             | -5.355866               | -0.187356 | -1.496003 |
| 2             | 6             | -4.399229               | -0.141008 | -0.488817 |
| 3             | 6             | -4.311952               | -1.154943 | 0.479300  |
| 4             | 6             | -5.193284               | -2.225801 | 0.464069  |
| 5             | 6             | -6.154552               | -2.278088 | -0.545913 |
| 6             | 6             | -6.231598               | -1.272279 | -1.510983 |
| 7             | 6             | -2.545465               | 0.538721  | 0.705755  |
| 8             | 6             | -2.873855               | 1.901999  | -1.108336 |
| 9             | 6             | -1.726078               | 2.432508  | -0.193246 |
| 10            | 6             | -0.482483               | 2.835334  | -0.946680 |
| 11            | 6             | -0.013906               | 4.146109  | -0.866305 |
| 12            | 6             | 0.205400                | 1.908893  | -1.735131 |
| 13            | 6             | 1.129670                | 4.531169  | -1.564757 |
| 14            | 6             | 1.347721                | 2.290650  | -2.433566 |
| 15            | 6             | 1.812252                | 3.603982  | -2.349100 |

|    |   |           |           |           |
|----|---|-----------|-----------|-----------|
| 16 | 6 | -0.414440 | 1.131034  | 2.028229  |
| 17 | 6 | 0.803632  | -1.140488 | 1.656957  |
| 18 | 6 | 0.773509  | 0.360856  | 1.426122  |
| 19 | 6 | 1.957320  | 1.080910  | 2.076103  |
| 20 | 6 | 2.266726  | -1.619959 | 1.943547  |
| 21 | 6 | 3.225300  | 0.602178  | 1.411711  |
| 22 | 6 | 3.318265  | -0.732483 | 1.313587  |
| 23 | 6 | 1.489188  | 2.523140  | 1.897662  |
| 24 | 6 | 3.248915  | -3.466437 | -0.997311 |
| 25 | 6 | 6.033006  | -2.228750 | -1.401692 |
| 26 | 6 | 3.479949  | -0.541087 | -1.918714 |
| 27 | 6 | 4.220255  | 1.568641  | 0.840262  |
| 28 | 6 | 0.237035  | -1.963982 | 0.517487  |
| 29 | 6 | -0.169386 | -2.071614 | -1.819030 |
| 30 | 6 | -1.670760 | -1.888414 | -1.920832 |
| 31 | 1 | -5.411812 | 0.598624  | -2.242644 |
| 32 | 1 | -5.126531 | -3.010780 | 1.211358  |
| 33 | 1 | -6.846593 | -3.113163 | -0.579067 |
| 34 | 1 | -6.984725 | -1.333489 | -2.290285 |
| 35 | 1 | -2.492423 | 1.483005  | -2.046938 |
| 36 | 1 | -3.620156 | 2.667685  | -1.322126 |
| 37 | 1 | -0.541904 | 4.865209  | -0.244953 |
| 38 | 1 | -0.146472 | 0.879209  | -1.783188 |
| 39 | 1 | 1.487364  | 5.554022  | -1.493562 |
| 40 | 1 | 1.875857  | 1.563861  | -3.043761 |
| 41 | 1 | 2.702677  | 3.900704  | -2.895441 |
| 42 | 1 | -2.083226 | 3.289715  | 0.387573  |
| 43 | 1 | 0.187948  | -1.377574 | 2.530005  |
| 44 | 1 | 0.845702  | 0.583881  | 0.359203  |
| 45 | 1 | 1.962163  | 0.848927  | 3.153030  |
| 46 | 1 | 2.408074  | -2.657962 | 1.628859  |
| 47 | 1 | 2.400438  | -1.605193 | 3.032163  |
| 48 | 1 | 1.930735  | 3.226218  | 2.610514  |
| 49 | 1 | 1.698941  | 2.875447  | 0.877072  |
| 50 | 1 | 3.175959  | -3.799422 | -2.040193 |
| 51 | 1 | 3.714336  | -4.275713 | -0.422775 |
| 52 | 1 | 2.228384  | -3.338506 | -0.620073 |
| 53 | 1 | 6.497353  | -2.973459 | -0.745697 |
| 54 | 1 | 6.080964  | -2.610442 | -2.427867 |
| 55 | 1 | 6.634965  | -1.314606 | -1.353432 |
| 56 | 1 | 3.315434  | -0.882647 | -2.948084 |
| 57 | 1 | 2.510321  | -0.259558 | -1.491166 |
| 58 | 1 | 4.111339  | 0.354016  | -1.955148 |
| 59 | 1 | 3.792255  | 2.132219  | 0.000588  |
| 60 | 1 | 4.531407  | 2.304767  | 1.592022  |
| 61 | 1 | 5.111881  | 1.047970  | 0.481046  |

|    |    |           |           |           |
|----|----|-----------|-----------|-----------|
| 62 | 1  | 0.101889  | -3.127165 | -1.738767 |
| 63 | 1  | 0.350020  | -1.632387 | -2.674297 |
| 64 | 1  | -1.923903 | -0.822171 | -1.958865 |
| 65 | 1  | -2.047858 | -2.362814 | -2.831977 |
| 66 | 1  | -2.171337 | -2.344583 | -1.061563 |
| 67 | 8  | -1.041880 | 0.658889  | 3.007417  |
| 68 | 8  | 4.377891  | -1.366659 | 0.709413  |
| 69 | 8  | 0.077374  | 2.485874  | 2.126820  |
| 70 | 8  | 0.344042  | -1.360325 | -0.679487 |
| 71 | 8  | -0.212494 | -3.080705 | 0.651195  |
| 72 | 7  | -3.428282 | 0.830867  | -0.277852 |
| 73 | 7  | -1.512766 | 1.315245  | 0.759470  |
| 74 | 16 | -2.988187 | -0.862007 | 1.635491  |
| 75 | 14 | 4.267691  | -1.894408 | -0.892848 |

*Product (complex with (S)-(-)-BTM catalyst):*

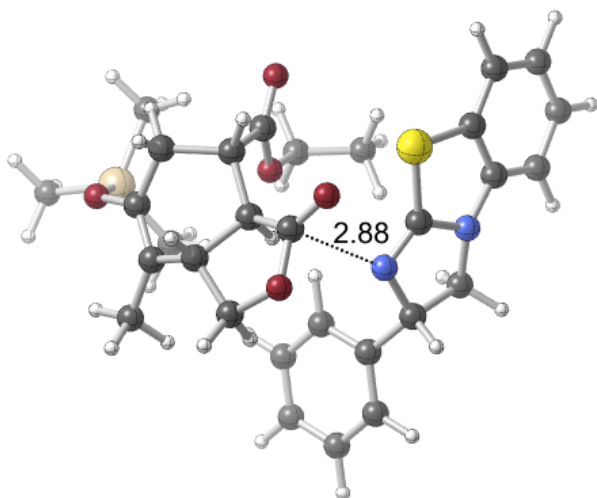

Charge = 0 Multiplicity = 1

HF = -2337.5589342 hartrees (-1466841.60679984 kcal/mol)

Imaginary Frequencies: none found

Zero-point correction = 0.619298 (Hartree/Particle)

Temperature 298.150 Kelvin. Pressure 1.00000 Atm.

Sum of electronic and thermal Free Energies =

-2337.010983 hartrees (-1466497.76194233 kcal/mol)

Coordinates (from last standard orientation):

| Center<br>Number | Atomic<br>Number | Coordinates (Angstroms) |           |           |
|------------------|------------------|-------------------------|-----------|-----------|
|                  |                  | X                       | Y         | Z         |
| 1                | 6                | -5.290997               | -0.475136 | -1.599859 |
| 2                | 6                | -4.371365               | -0.365070 | -0.562492 |
| 3                | 6                | -4.101028               | -1.459438 | 0.278038  |
| 4                | 6                | -4.758145               | -2.667053 | 0.103606  |
| 5                | 6                | -5.686765               | -2.778837 | -0.934847 |
| 6                | 6                | -5.943770               | -1.696267 | -1.775323 |
| 7                | 6                | -2.652572               | 0.518808  | 0.748896  |
| 8                | 6                | -3.236038               | 1.932728  | -0.953710 |
| 9                | 6                | -2.166444               | 2.531280  | 0.017607  |
| 10               | 6                | -0.996009               | 3.141962  | -0.716659 |
| 11               | 6                | -0.945979               | 4.520785  | -0.926080 |
| 12               | 6                | 0.017188                | 2.335371  | -1.245798 |
| 13               | 6                | 0.093874                | 5.090665  | -1.659026 |
| 14               | 6                | 1.055443                | 2.903531  | -1.981068 |
| 15               | 6                | 1.096309                | 4.282507  | -2.188904 |
| 16               | 6                | -0.041396               | 0.434110  | 3.005355  |
| 17               | 6                | 1.143503                | -1.548336 | 1.747075  |
| 18               | 6                | 0.930818                | -0.051874 | 1.958380  |
| 19               | 6                | 2.193409                | 0.704190  | 2.389462  |
| 20               | 6                | 2.677840                | -1.854183 | 1.698209  |
| 21               | 6                | 3.277831                | 0.528448  | 1.363182  |
| 22               | 6                | 3.487547                | -0.756535 | 1.037187  |
| 23               | 6                | 1.559938                | 2.053851  | 2.697758  |
| 24               | 6                | 3.336726                | -3.114000 | -1.648182 |
| 25               | 6                | 5.958611                | -1.615574 | -2.164059 |
| 26               | 6                | 3.290671                | -0.048101 | -2.191475 |
| 27               | 6                | 4.014404                | 1.699810  | 0.787290  |
| 28               | 6                | 0.524952                | -2.088274 | 0.468211  |
| 29               | 6                | 0.097562                | -1.660639 | -1.832769 |
| 30               | 6                | -1.404552               | -1.483932 | -1.902664 |
| 31               | 1                | -5.491371               | 0.372415  | -2.248179 |
| 32               | 1                | -4.543807               | -3.512342 | 0.750753  |
| 33               | 1                | -6.205092               | -3.719830 | -1.087462 |
| 34               | 1                | -6.664477               | -1.799940 | -2.580513 |
| 35               | 1                | -2.801358               | 1.644350  | -1.920629 |
| 36               | 1                | -4.076391               | 2.609193  | -1.119520 |
| 37               | 1                | -1.727765               | 5.152406  | -0.510386 |
| 38               | 1                | -0.010550               | 1.259477  | -1.075724 |
| 39               | 1                | 0.120865                | 6.165478  | -1.812857 |
| 40               | 1                | 1.833439                | 2.268460  | -2.394983 |
| 41               | 1                | 1.907659                | 4.723473  | -2.760578 |

|    |    |           |           |           |
|----|----|-----------|-----------|-----------|
| 42 | 1  | -2.640779 | 3.310100  | 0.627565  |
| 43 | 1  | 0.697186  | -2.128674 | 2.559362  |
| 44 | 1  | 0.595569  | 0.417426  | 1.024831  |
| 45 | 1  | 2.525705  | 0.286971  | 3.354518  |
| 46 | 1  | 2.861096  | -2.810656 | 1.200147  |
| 47 | 1  | 3.014226  | -1.971945 | 2.736320  |
| 48 | 1  | 2.126436  | 2.688347  | 3.380424  |
| 49 | 1  | 1.303307  | 2.613216  | 1.790033  |
| 50 | 1  | 3.111656  | -3.303644 | -2.704840 |
| 51 | 1  | 3.966733  | -3.937752 | -1.292027 |
| 52 | 1  | 2.393831  | -3.160582 | -1.093377 |
| 53 | 1  | 6.527070  | -2.414403 | -1.675123 |
| 54 | 1  | 5.922100  | -1.839748 | -3.236315 |
| 55 | 1  | 6.511874  | -0.678863 | -2.035814 |
| 56 | 1  | 2.947176  | -0.275428 | -3.207560 |
| 57 | 1  | 2.415962  | 0.183493  | -1.573139 |
| 58 | 1  | 3.923041  | 0.845667  | -2.242143 |
| 59 | 1  | 3.353070  | 2.317647  | 0.165147  |
| 60 | 1  | 4.406827  | 2.349306  | 1.579331  |
| 61 | 1  | 4.852896  | 1.369596  | 0.168570  |
| 62 | 1  | 0.382885  | -2.702595 | -1.996382 |
| 63 | 1  | 0.611733  | -1.028661 | -2.560385 |
| 64 | 1  | -1.677627 | -0.446829 | -1.677469 |
| 65 | 1  | -1.759315 | -1.721767 | -2.910389 |
| 66 | 1  | -1.905142 | -2.148367 | -1.193954 |
| 67 | 8  | -0.979496 | -0.126273 | 3.513555  |
| 68 | 8  | 4.486670  | -1.155201 | 0.189136  |
| 69 | 8  | 0.335252  | 1.679251  | 3.375445  |
| 70 | 8  | 0.609217  | -1.224345 | -0.557144 |
| 71 | 8  | 0.087963  | -3.210634 | 0.354977  |
| 72 | 7  | -3.629687 | 0.746703  | -0.203762 |
| 73 | 7  | -1.770363 | 1.425427  | 0.920639  |
| 74 | 16 | -2.851980 | -1.076277 | 1.484364  |
| 75 | 14 | 4.238365  | -1.482190 | -1.450502 |

*Product:*

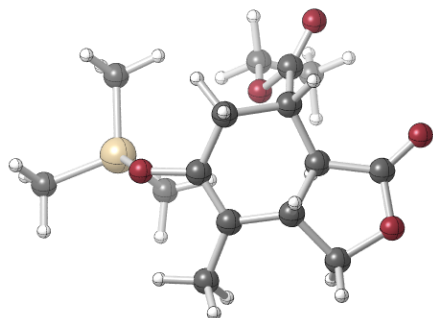

Charge = 0 Multiplicity = 1

HF = -1251.322997 hartrees (-785217.69384747 kcal/mol)

Imaginary Frequencies: none found

Zero-point correction = 0.378570 (Hartree/Particle)

Temperature 298.150 Kelvin. Pressure 1.00000 Atm.

Sum of electronic and thermal Free Energies =

-1250.998262 hartrees (-785013.91938762 kcal/mol)

Coordinates (from last standard orientation):

| Center<br>Number | Atomic<br>Number | Coordinates (Angstroms) |           |           |
|------------------|------------------|-------------------------|-----------|-----------|
|                  |                  | X                       | Y         | Z         |
| 1                | 6                | -3.397637               | -0.358907 | 0.071827  |
| 2                | 6                | -1.295353               | 0.468737  | -1.253636 |
| 3                | 6                | -1.901247               | -0.356114 | -0.119625 |
| 4                | 6                | -1.601519               | -1.850364 | -0.233421 |
| 5                | 6                | -0.023104               | -0.253429 | -1.801382 |
| 6                | 6                | -0.117932               | -2.064382 | -0.090841 |
| 7                | 6                | 0.622114                | -1.228921 | -0.835023 |
| 8                | 6                | -2.578021               | -2.381778 | 0.810545  |
| 9                | 6                | 3.198843                | 1.371047  | -0.834593 |
| 10               | 6                | 4.637091                | -1.175436 | 0.072133  |
| 11               | 6                | 2.296179                | -0.078821 | 1.759212  |
| 12               | 6                | 0.432969                | -3.110576 | 0.831132  |
| 13               | 6                | -0.942976               | 1.859298  | -0.769807 |
| 14               | 6                | 0.404621                | 3.055377  | 0.778626  |
| 15               | 6                | -0.584666               | 3.499520  | 1.836006  |
| 16               | 1                | -2.023051               | 0.596053  | -2.058266 |
| 17               | 1                | -1.476249               | -0.026531 | 0.840293  |
| 18               | 1                | -1.954121               | -2.195942 | -1.218521 |

|    |    |           |           |           |
|----|----|-----------|-----------|-----------|
| 19 | 1  | 0.721426  | 0.477957  | -2.129438 |
| 20 | 1  | -0.324650 | -0.808493 | -2.698350 |
| 21 | 1  | -2.899833 | -3.412155 | 0.656661  |
| 22 | 1  | -2.201838 | -2.259307 | 1.832339  |
| 23 | 1  | 3.863784  | 2.026085  | -0.258244 |
| 24 | 1  | 3.646027  | 1.233523  | -1.825901 |
| 25 | 1  | 2.244848  | 1.891422  | -0.963286 |
| 26 | 1  | 4.540204  | -2.153866 | 0.555599  |
| 27 | 1  | 5.024642  | -1.335441 | -0.940140 |
| 28 | 1  | 5.386336  | -0.599457 | 0.627572  |
| 29 | 1  | 2.877463  | 0.657864  | 2.326666  |
| 30 | 1  | 1.254969  | 0.259543  | 1.730848  |
| 31 | 1  | 2.335773  | -1.024835 | 2.311102  |
| 32 | 1  | 0.213484  | -2.878726 | 1.881143  |
| 33 | 1  | -0.012233 | -4.091264 | 0.622180  |
| 34 | 1  | 1.516838  | -3.197725 | 0.720450  |
| 35 | 1  | 0.511165  | 3.799655  | -0.014147 |
| 36 | 1  | 1.387174  | 2.846894  | 1.208376  |
| 37 | 1  | -0.688729 | 2.733475  | 2.610352  |
| 38 | 1  | -0.232177 | 4.421937  | 2.306958  |
| 39 | 1  | -1.565387 | 3.690815  | 1.392165  |
| 40 | 8  | -4.206441 | 0.491226  | -0.191554 |
| 41 | 8  | 1.988910  | -1.290685 | -0.868032 |
| 42 | 8  | -3.743685 | -1.536892 | 0.643667  |
| 43 | 8  | -0.005398 | 1.805212  | 0.191918  |
| 44 | 8  | -1.412313 | 2.888719  | -1.192522 |
| 45 | 14 | 2.999241  | -0.277402 | 0.034919  |



c. Lactonization step of DAL organocascade

ii. Ketene pathway

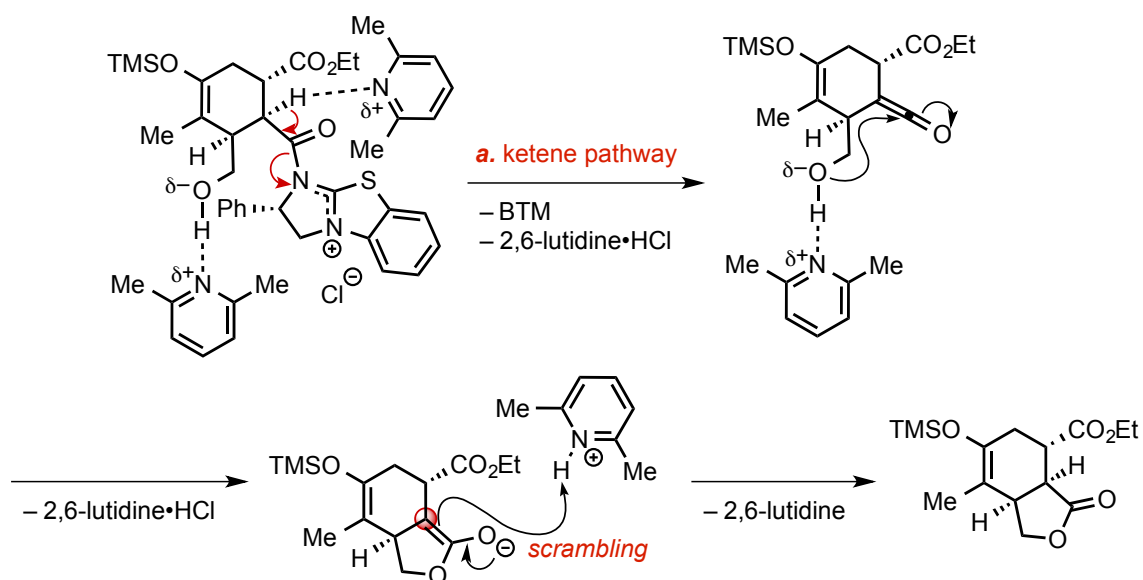

**Scheme S3.** A ketene pathway was investigated for lactonization; however, this pathway would potentially lead to stereochemical scrambling, which is not experimentally observed.

*Diels-Alder product (endo):*

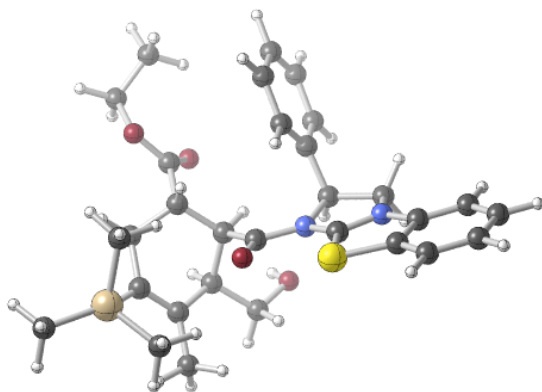

Charge = 1 Multiplicity = 1

HF = -2338.0058055 hartrees (-1467122.0230093 kcal/mol)

Imaginary Frequencies: none found

Zero-point correction = 0.633959 (Hartree/Particle)

Temperature 298.150 Kelvin. Pressure 1.00000 Atm.

Sum of electronic and thermal Free Energies =

-2337.442357 hartrees (-1466768.45344107 kcal/mol)

Coordinates (from last standard orientation):

| Center<br>Number | Atomic<br>Number | Coordinates (Angstroms) |           |           |
|------------------|------------------|-------------------------|-----------|-----------|
|                  |                  | X                       | Y         | Z         |
| 1                | 6                | -6.028443               | -0.351319 | -0.080054 |
| 2                | 6                | -4.690019               | -0.723403 | -0.157688 |
| 3                | 6                | -4.288515               | -1.921822 | -0.761050 |
| 4                | 6                | -5.226731               | -2.788241 | -1.313068 |
| 5                | 6                | -6.565766               | -2.422412 | -1.236920 |
| 6                | 6                | -6.959804               | -1.222396 | -0.629220 |
| 7                | 6                | -2.425956               | -0.625474 | 0.121761  |
| 8                | 6                | -3.429889               | 1.213020  | 1.094257  |
| 9                | 6                | -1.882555               | 1.407563  | 1.092278  |
| 10               | 6                | -1.424117               | 2.527680  | 0.182443  |
| 11               | 6                | -1.435982               | 3.826881  | 0.693744  |
| 12               | 6                | -1.030764               | 2.307182  | -1.138233 |
| 13               | 6                | -1.080916               | 4.901352  | -0.115480 |
| 14               | 6                | -0.660789               | 3.384321  | -1.943236 |
| 15               | 6                | -0.695461               | 4.681438  | -1.437213 |
| 16               | 6                | -0.064188               | -0.349901 | 0.432696  |
| 17               | 6                | 1.030634                | 0.497998  | 1.028591  |

|    |   |           |           |           |
|----|---|-----------|-----------|-----------|
| 18 | 6 | 2.096054  | 0.814298  | -0.040044 |
| 19 | 6 | 1.637913  | -0.251262 | 2.253611  |
| 20 | 6 | 3.436451  | 0.059632  | 0.187534  |
| 21 | 6 | 0.564762  | -0.548277 | 3.302699  |
| 22 | 6 | 3.239903  | -1.310369 | 0.779558  |
| 23 | 6 | 5.014138  | -4.159729 | -1.619768 |
| 24 | 6 | 2.881116  | -2.059195 | -2.420930 |
| 25 | 6 | 2.109434  | -4.360309 | -0.574532 |
| 26 | 6 | 2.404383  | -1.485010 | 1.810480  |
| 27 | 6 | 2.422808  | 2.298080  | -0.050745 |
| 28 | 6 | 3.769418  | 3.914312  | -1.142624 |
| 29 | 6 | 2.788152  | 4.972579  | -1.598358 |
| 30 | 6 | 2.214542  | -2.806891 | 2.499354  |
| 31 | 1 | -6.319913 | 0.580264  | 0.393770  |
| 32 | 1 | -4.923165 | -3.717345 | -1.784164 |
| 33 | 1 | -7.317853 | -3.082011 | -1.656557 |
| 34 | 1 | -8.013222 | -0.966725 | -0.586014 |
| 35 | 1 | -3.950065 | 2.034689  | 0.600918  |
| 36 | 1 | -3.830181 | 1.055062  | 2.097785  |
| 37 | 1 | -1.724684 | 3.994879  | 1.728677  |
| 38 | 1 | -1.010108 | 1.302026  | -1.553162 |
| 39 | 1 | -1.096117 | 5.909059  | 0.288300  |
| 40 | 1 | -0.353297 | 3.206353  | -2.969441 |
| 41 | 1 | -0.412114 | 5.519379  | -2.066962 |
| 42 | 1 | -1.522654 | 1.561009  | 2.110883  |
| 43 | 1 | 0.614498  | 1.437153  | 1.393606  |
| 44 | 1 | 2.335159  | 0.477454  | 2.699376  |
| 45 | 1 | 3.982795  | -0.006162 | -0.755071 |
| 46 | 1 | 4.057026  | 0.651383  | 0.876117  |
| 47 | 1 | 1.726294  | 0.546877  | -1.034932 |
| 48 | 1 | -0.154449 | -1.287120 | 2.930642  |
| 49 | 1 | 1.030030  | -0.970942 | 4.201197  |
| 50 | 1 | 5.832012  | -3.481537 | -1.886159 |
| 51 | 1 | 5.371861  | -4.822824 | -0.824431 |
| 52 | 1 | 4.791916  | -4.779467 | -2.495951 |
| 53 | 1 | 1.998490  | -1.506515 | -2.077925 |
| 54 | 1 | 3.642734  | -1.340536 | -2.742409 |
| 55 | 1 | 2.580315  | -2.640742 | -3.300945 |
| 56 | 1 | 2.421812  | -5.077173 | 0.192118  |
| 57 | 1 | 1.257329  | -3.787692 | -0.191272 |
| 58 | 1 | 1.762966  | -4.930953 | -1.445163 |
| 59 | 1 | 4.599336  | 3.813112  | -1.844034 |
| 60 | 1 | 4.166262  | 4.137976  | -0.148802 |
| 61 | 1 | 3.311966  | 5.926733  | -1.713130 |
| 62 | 1 | 2.351706  | 4.701040  | -2.564440 |
| 63 | 1 | 1.987679  | 5.099019  | -0.866510 |

|    |    |           |           |           |
|----|----|-----------|-----------|-----------|
| 64 | 1  | 0.405028  | 1.251836  | 4.033577  |
| 65 | 1  | 1.193137  | -3.190472 | 2.382963  |
| 66 | 1  | 2.903446  | -3.547444 | 2.088112  |
| 67 | 1  | 2.409402  | -2.728755 | 3.575831  |
| 68 | 8  | 0.109793  | -1.390329 | -0.170740 |
| 69 | 8  | 4.017715  | -2.310585 | 0.257228  |
| 70 | 8  | 2.130780  | 3.085246  | 0.820760  |
| 71 | 8  | 3.172643  | 2.600597  | -1.114210 |
| 72 | 8  | -0.196944 | 0.603787  | 3.630219  |
| 73 | 7  | -3.584223 | -0.024649 | 0.319241  |
| 74 | 7  | -1.390714 | 0.079285  | 0.623290  |
| 75 | 16 | -2.528362 | -2.123607 | -0.704677 |
| 76 | 14 | 3.498730  | -3.212665 | -1.079601 |

*2,6-lutidine/2,6-dimethylpyridine (DMP):*

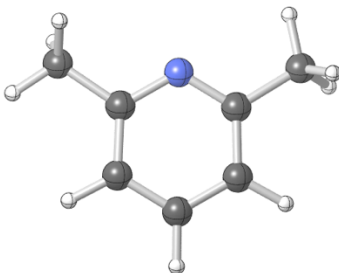

Charge = 0 Multiplicity = 1

HF = -326.7824947 hartrees (-205059.283249197 kcal/mol)

Imaginary Frequencies: none found

Zero-point correction = 0.145307 (Hartree/Particle)

Temperature 298.150 Kelvin. Pressure 1.00000 Atm.

Sum of electronic and thermal Free Energies =

-326.669833 hartrees (-204988.58690583 kcal/mol)

Coordinates (from last standard orientation):

| Center Number | Atomic Number | Coordinates (Angstroms) |           |           |
|---------------|---------------|-------------------------|-----------|-----------|
|               |               | X                       | Y         | Z         |
| 1             | 6             | -1.160473               | -0.261946 | -0.004035 |
| 2             | 6             | -1.195166               | 1.131299  | -0.003236 |
| 3             | 6             | 0.008859                | 1.831739  | 0.000842  |
| 4             | 6             | 1.199720                | 1.121255  | 0.003073  |
| 5             | 6             | 1.149738                | -0.278042 | 0.001039  |
| 6             | 7             | -0.006143               | -0.949731 | -0.002114 |

|    |   |           |           |           |
|----|---|-----------|-----------|-----------|
| 7  | 1 | 0.013558  | 2.918072  | 0.001370  |
| 8  | 1 | -2.147267 | 1.652127  | -0.005575 |
| 9  | 1 | 2.159615  | 1.628875  | 0.005136  |
| 10 | 6 | 2.418847  | -1.088539 | -0.000521 |
| 11 | 1 | 3.018921  | -0.873332 | -0.891088 |
| 12 | 1 | 3.035787  | -0.852185 | 0.872816  |
| 13 | 1 | 2.182057  | -2.154074 | 0.013626  |
| 14 | 6 | -2.421617 | -1.082545 | 0.002318  |
| 15 | 1 | -2.405224 | -1.812259 | -0.812977 |
| 16 | 1 | -2.505201 | -1.644612 | 0.938663  |
| 17 | 1 | -3.308700 | -0.453813 | -0.104057 |

Chloride anion (Cl<sup>-</sup>):

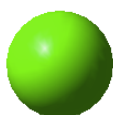

Charge = -1 Multiplicity = 1

HF = -460.31703 hartrees (-288853.5394953 kcal/mol)

Imaginary Frequencies: none found

Zero-point correction = 0.000000 (Hartree/Particle)

Temperature 298.150 Kelvin. Pressure 1.00000 Atm.

Sum of electronic and thermal Free Energies =

-460.332053 hartrees (-288862.96657803 kcal/mol)

Coordinates (from last standard orientation):

atom 1 is isolated, type=Cl

| Center<br>Number | Atomic<br>Number | Coordinates (Angstroms) |          |          |
|------------------|------------------|-------------------------|----------|----------|
|                  |                  | X                       | Y        | Z        |
| 1                | 17               | 0.000000                | 0.000000 | 0.000000 |

*Protonated 2,6-lutidine:*

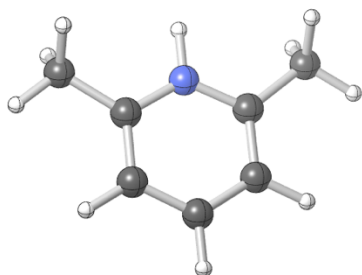

Charge = 1 Multiplicity = 1

HF = -327.2368823 hartrees (-205344.416012073 kcal/mol)

Imaginary Frequencies: none found

Zero-point correction = 0.159452 (Hartree/Particle)

Temperature 298.150 Kelvin. Pressure 1.00000 Atm.

Sum of electronic and thermal Free Energies =

-327.109815 hartrees (-205264.68001065 kcal/mol)

Coordinates (from last standard orientation):

| Center<br>Number | Atomic<br>Number | Coordinates (Angstroms) |           |           |
|------------------|------------------|-------------------------|-----------|-----------|
|                  |                  | X                       | Y         | Z         |
| 1                | 6                | 1.201400                | -0.224554 | -0.000015 |
| 2                | 6                | 1.208756                | 1.160921  | -0.000092 |
| 3                | 6                | 0.000000                | 1.851219  | -0.000080 |
| 4                | 6                | -1.208755               | 1.160921  | -0.000012 |
| 5                | 6                | -1.201400               | -0.224553 | 0.000024  |
| 6                | 7                | 0.000000                | -0.844275 | 0.000028  |
| 7                | 1                | 0.000001                | 2.936645  | -0.000116 |
| 8                | 1                | 2.157473                | 1.683848  | -0.000142 |
| 9                | 1                | -2.157473               | 1.683848  | -0.000001 |
| 10               | 1                | 0.000000                | -1.866334 | 0.000068  |
| 11               | 6                | -2.420240               | -1.085936 | -0.000100 |
| 12               | 1                | -2.434712               | -1.727254 | -0.886837 |
| 13               | 1                | -2.434389               | -1.728149 | 0.885984  |
| 14               | 1                | -3.316122               | -0.464886 | 0.000346  |
| 15               | 6                | 2.420240                | -1.085936 | 0.000205  |
| 16               | 1                | 2.434744                | -1.727083 | 0.887066  |
| 17               | 1                | 2.434356                | -1.728321 | -0.885754 |
| 18               | 1                | 3.316122                | -0.464886 | -0.000389 |

(S)-(-)-BTM catalyst:

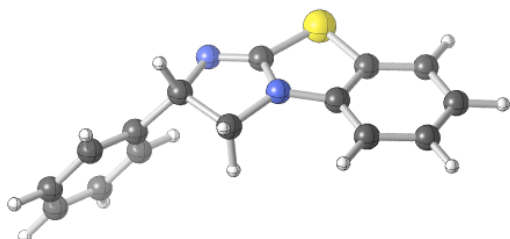

Charge = 0 Multiplicity = 1

HF = -1086.2217193 hartrees (-681614.991077943 kcal/mol)

Imaginary Frequencies: none found

Zero-point correction = 0.238948 (Hartree/Particle)

Temperature 298.150 Kelvin. Pressure 1.00000 Atm.

Sum of electronic and thermal Free Energies =

-1086.024409 hartrees (-681491.17689159 kcal/mol)

Coordinates (from last standard orientation):

| Center<br>Number | Atomic<br>Number | Coordinates (Angstroms) |           |           |
|------------------|------------------|-------------------------|-----------|-----------|
|                  |                  | X                       | Y         | Z         |
| 1                | 6                | -2.658926               | -1.872440 | 0.032577  |
| 2                | 6                | -2.123816               | -0.600345 | -0.141211 |
| 3                | 6                | -2.895105               | 0.543447  | 0.132450  |
| 4                | 6                | -4.207606               | 0.432725  | 0.561787  |
| 5                | 6                | -4.746737               | -0.845244 | 0.732328  |
| 6                | 6                | -3.978352               | -1.979555 | 0.473061  |
| 7                | 1                | -2.058599               | -2.752062 | -0.178240 |
| 8                | 1                | -4.800047               | 1.317910  | 0.772337  |
| 9                | 1                | -5.771715               | -0.949580 | 1.072628  |
| 10               | 1                | -4.410212               | -2.965542 | 0.613459  |
| 11               | 6                | -0.539268               | 1.070167  | -0.533267 |
| 12               | 16               | -1.966889               | 2.036351  | -0.147291 |
| 13               | 7                | -0.860156               | -0.271737 | -0.595974 |
| 14               | 6                | 0.395774                | -1.012047 | -0.630557 |
| 15               | 6                | 1.379397                | 0.139158  | -1.027978 |
| 16               | 7                | 0.675758                | 1.406318  | -0.721608 |
| 17               | 6                | 2.713946                | 0.013122  | -0.330895 |
| 18               | 6                | 3.702254                | -0.807909 | -0.878940 |
| 19               | 6                | 2.957188                | 0.651293  | 0.886801  |
| 20               | 6                | 4.914045                | -0.995064 | -0.218440 |
| 21               | 1                | 3.520707                | -1.300931 | -1.831631 |

|    |   |          |           |           |
|----|---|----------|-----------|-----------|
| 22 | 6 | 4.171891 | 0.470832  | 1.545054  |
| 23 | 1 | 2.193991 | 1.298559  | 1.309570  |
| 24 | 6 | 5.151970 | -0.354415 | 0.996466  |
| 25 | 1 | 5.674328 | -1.635977 | -0.655503 |
| 26 | 1 | 4.353595 | 0.977589  | 2.488602  |
| 27 | 1 | 6.098468 | -0.494531 | 1.510257  |
| 28 | 1 | 0.621577 | -1.422838 | 0.361589  |
| 29 | 1 | 0.374413 | -1.817883 | -1.366373 |
| 30 | 1 | 1.544570 | 0.099252  | -2.112384 |

*Ketene intermediate (INT):*

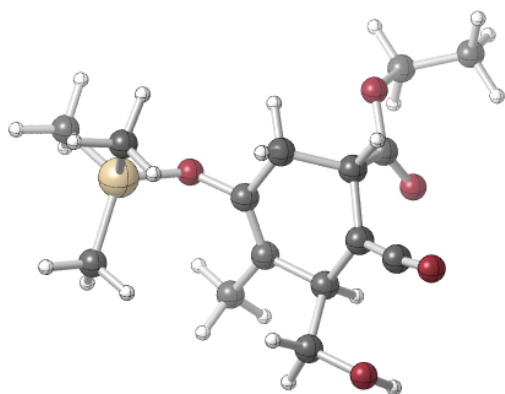

Charge = 0 Multiplicity = 1

HF = -1251.2691394 hartrees (-785183.897664894 kcal/mol)

Imaginary Frequencies: none found

Zero-point correction = 0.375508 (Hartree/Particle)

Temperature 298.150 Kelvin. Pressure 1.00000 Atm.

Sum of electronic and thermal Free Energies =

-1250.949835 hartrees (-784983.53096085 kcal/mol)

Coordinates (from last standard orientation):

| Center<br>Number | Atomic<br>Number | Coordinates (Angstroms) |           |           |
|------------------|------------------|-------------------------|-----------|-----------|
|                  |                  | X                       | Y         | Z         |
| 1                | 6                | -2.152541               | 2.153866  | 1.238162  |
| 2                | 6                | -1.480118               | 1.298835  | 0.495865  |
| 3                | 6                | -1.467636               | -0.145911 | 0.940932  |
| 4                | 6                | -0.732124               | 1.650035  | -0.772577 |
| 5                | 6                | -0.009930               | -0.607475 | 1.078228  |



|    |    |           |           |           |
|----|----|-----------|-----------|-----------|
| 6  | 6  | -0.257704 | 3.105743  | -0.724193 |
| 7  | 6  | 0.785995  | -0.239762 | -0.148516 |
| 8  | 6  | 4.433354  | -2.198937 | -0.163620 |
| 9  | 6  | 3.260085  | -0.525171 | 2.152339  |
| 10 | 6  | 4.082892  | 0.865049  | -0.443207 |
| 11 | 6  | 0.446490  | 0.726208  | -1.015832 |
| 12 | 6  | -2.221130 | -1.017773 | -0.062498 |
| 13 | 6  | -2.828381 | -3.244423 | -0.582256 |
| 14 | 6  | -4.307082 | -3.295111 | -0.256882 |
| 15 | 6  | 1.211121  | 0.960507  | -2.291367 |
| 16 | 1  | -1.414400 | 1.549733  | -1.632779 |
| 17 | 1  | 0.424618  | -0.153917 | 1.976725  |
| 18 | 1  | 0.038668  | -1.693211 | 1.206951  |
| 19 | 1  | -1.976517 | -0.271521 | 1.903216  |
| 20 | 1  | 0.498933  | 3.217882  | 0.059556  |
| 21 | 1  | 0.190610  | 3.394555  | -1.683021 |
| 22 | 1  | 4.022793  | -3.115479 | 0.273986  |
| 23 | 1  | 4.475111  | -2.334482 | -1.249850 |
| 24 | 1  | 5.460628  | -2.084650 | 0.200563  |
| 25 | 1  | 2.695176  | 0.371477  | 2.431277  |
| 26 | 1  | 2.777834  | -1.392264 | 2.616900  |
| 27 | 1  | 4.261289  | -0.427590 | 2.589681  |
| 28 | 1  | 4.230237  | 0.783615  | -1.525256 |
| 29 | 1  | 3.416069  | 1.713746  | -0.250860 |
| 30 | 1  | 5.053506  | 1.099022  | 0.011123  |
| 31 | 1  | -2.343002 | -4.202270 | -0.387298 |
| 32 | 1  | -2.655408 | -2.961067 | -1.623038 |
| 33 | 1  | -4.793540 | -4.053936 | -0.877299 |
| 34 | 1  | -4.461394 | -3.556915 | 0.793853  |
| 35 | 1  | -4.781086 | -2.330381 | -0.455336 |
| 36 | 1  | 1.871331  | 1.834384  | -2.229404 |
| 37 | 1  | 1.826097  | 0.093723  | -2.543955 |
| 38 | 1  | 0.514129  | 1.144051  | -3.118524 |
| 39 | 8  | -2.782245 | 2.800964  | 1.982772  |
| 40 | 8  | 1.877078  | -1.047786 | -0.364791 |
| 41 | 8  | -2.824565 | -0.612079 | -1.028209 |
| 42 | 8  | -2.140313 | -2.311082 | 0.273470  |
| 43 | 8  | -1.318246 | 3.981449  | -0.381199 |
| 44 | 14 | 3.396618  | -0.714234 | 0.292981  |
| 45 | 1  | -1.957754 | 3.968968  | -1.112753 |

c. Lactonization step of DAL organocascade  
iii. Intramolecular proton-transfer pathway

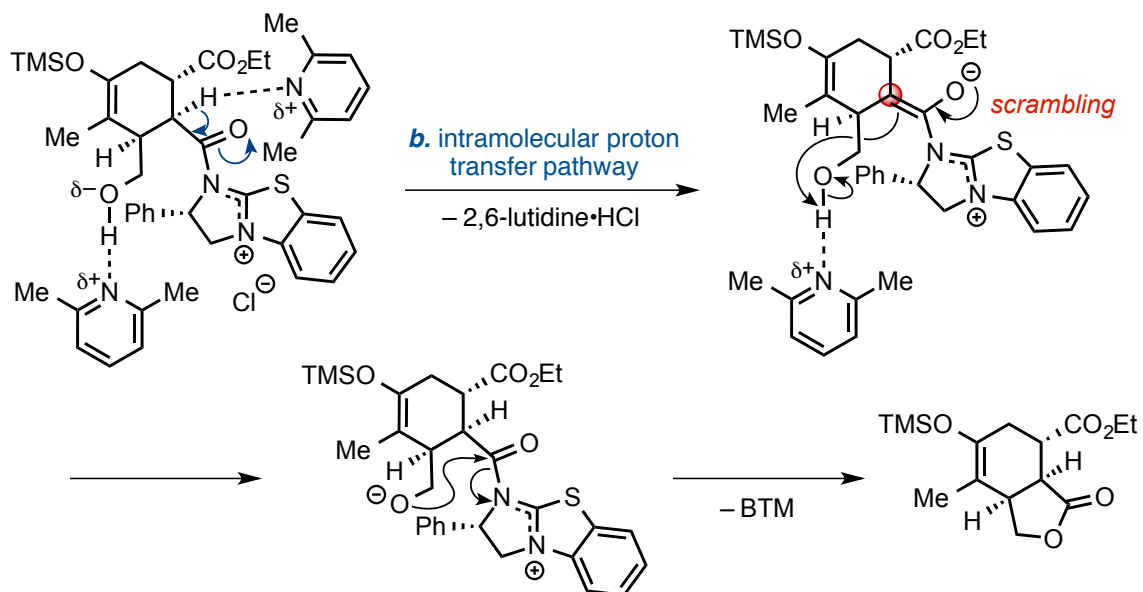

**Scheme S4.** An intramolecular proton-relay pathway was investigated for lactonization; however, this pathway would potentially lead to stereochemical scrambling, which is not experimentally observed.

*Diels-Alder product (endo):*

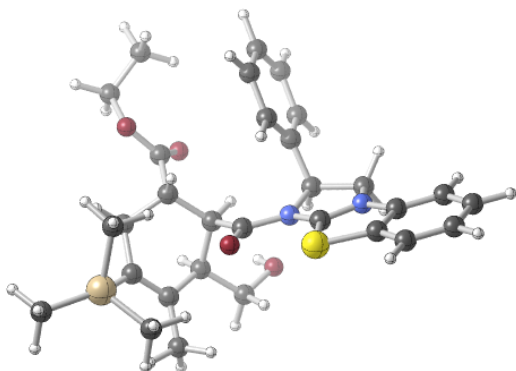

Charge = 1 Multiplicity = 1

HF = -2338.0058055 hartrees (-1467122.0230093 kcal/mol)

Imaginary Frequencies: none found

Zero-point correction = 0.633959 (Hartree/Particle)

Temperature 298.150 Kelvin. Pressure 1.00000 Atm.

Sum of electronic and thermal Free Energies =

-2337.442357 hartrees (-1466768.45344107 kcal/mol)

Coordinates (from last standard orientation):

| Center Number | Atomic Number | Coordinates (Angstroms) |           |           |
|---------------|---------------|-------------------------|-----------|-----------|
|               |               | X                       | Y         | Z         |
| 1             | 6             | -6.028443               | -0.351319 | -0.080054 |
| 2             | 6             | -4.690019               | -0.723403 | -0.157688 |
| 3             | 6             | -4.288515               | -1.921822 | -0.761050 |
| 4             | 6             | -5.226731               | -2.788241 | -1.313068 |
| 5             | 6             | -6.565766               | -2.422412 | -1.236920 |
| 6             | 6             | -6.959804               | -1.222396 | -0.629220 |
| 7             | 6             | -2.425956               | -0.625474 | 0.121761  |
| 8             | 6             | -3.429889               | 1.213020  | 1.094257  |
| 9             | 6             | -1.882555               | 1.407563  | 1.092278  |
| 10            | 6             | -1.424117               | 2.527680  | 0.182443  |
| 11            | 6             | -1.435982               | 3.826881  | 0.693744  |
| 12            | 6             | -1.030764               | 2.307182  | -1.138233 |
| 13            | 6             | -1.080916               | 4.901352  | -0.115480 |
| 14            | 6             | -0.660789               | 3.384321  | -1.943236 |
| 15            | 6             | -0.695461               | 4.681438  | -1.437213 |
| 16            | 6             | -0.064188               | -0.349901 | 0.432696  |
| 17            | 6             | 1.030634                | 0.497998  | 1.028591  |

|    |   |           |           |           |
|----|---|-----------|-----------|-----------|
| 18 | 6 | 2.096054  | 0.814298  | -0.040044 |
| 19 | 6 | 1.637913  | -0.251262 | 2.253611  |
| 20 | 6 | 3.436451  | 0.059632  | 0.187534  |
| 21 | 6 | 0.564762  | -0.548277 | 3.302699  |
| 22 | 6 | 3.239903  | -1.310369 | 0.779558  |
| 23 | 6 | 5.014138  | -4.159729 | -1.619768 |
| 24 | 6 | 2.881116  | -2.059195 | -2.420930 |
| 25 | 6 | 2.109434  | -4.360309 | -0.574532 |
| 26 | 6 | 2.404383  | -1.485010 | 1.810480  |
| 27 | 6 | 2.422808  | 2.298080  | -0.050745 |
| 28 | 6 | 3.769418  | 3.914312  | -1.142624 |
| 29 | 6 | 2.788152  | 4.972579  | -1.598358 |
| 30 | 6 | 2.214542  | -2.806891 | 2.499354  |
| 31 | 1 | -6.319913 | 0.580264  | 0.393770  |
| 32 | 1 | -4.923165 | -3.717345 | -1.784164 |
| 33 | 1 | -7.317853 | -3.082011 | -1.656557 |
| 34 | 1 | -8.013222 | -0.966725 | -0.586014 |
| 35 | 1 | -3.950065 | 2.034689  | 0.600918  |
| 36 | 1 | -3.830181 | 1.055062  | 2.097785  |
| 37 | 1 | -1.724684 | 3.994879  | 1.728677  |
| 38 | 1 | -1.010108 | 1.302026  | -1.553162 |
| 39 | 1 | -1.096117 | 5.909059  | 0.288300  |
| 40 | 1 | -0.353297 | 3.206353  | -2.969441 |
| 41 | 1 | -0.412114 | 5.519379  | -2.066962 |
| 42 | 1 | -1.522654 | 1.561009  | 2.110883  |
| 43 | 1 | 0.614498  | 1.437153  | 1.393606  |
| 44 | 1 | 2.335159  | 0.477454  | 2.699376  |
| 45 | 1 | 3.982795  | -0.006162 | -0.755071 |
| 46 | 1 | 4.057026  | 0.651383  | 0.876117  |
| 47 | 1 | 1.726294  | 0.546877  | -1.034932 |
| 48 | 1 | -0.154449 | -1.287120 | 2.930642  |
| 49 | 1 | 1.030030  | -0.970942 | 4.201197  |
| 50 | 1 | 5.832012  | -3.481537 | -1.886159 |
| 51 | 1 | 5.371861  | -4.822824 | -0.824431 |
| 52 | 1 | 4.791916  | -4.779467 | -2.495951 |
| 53 | 1 | 1.998490  | -1.506515 | -2.077925 |
| 54 | 1 | 3.642734  | -1.340536 | -2.742409 |
| 55 | 1 | 2.580315  | -2.640742 | -3.300945 |
| 56 | 1 | 2.421812  | -5.077173 | 0.192118  |
| 57 | 1 | 1.257329  | -3.787692 | -0.191272 |
| 58 | 1 | 1.762966  | -4.930953 | -1.445163 |
| 59 | 1 | 4.599336  | 3.813112  | -1.844034 |
| 60 | 1 | 4.166262  | 4.137976  | -0.148802 |
| 61 | 1 | 3.311966  | 5.926733  | -1.713130 |
| 62 | 1 | 2.351706  | 4.701040  | -2.564440 |
| 63 | 1 | 1.987679  | 5.099019  | -0.866510 |

|    |    |           |           |           |
|----|----|-----------|-----------|-----------|
| 64 | 1  | 0.405028  | 1.251836  | 4.033577  |
| 65 | 1  | 1.193137  | -3.190472 | 2.382963  |
| 66 | 1  | 2.903446  | -3.547444 | 2.088112  |
| 67 | 1  | 2.409402  | -2.728755 | 3.575831  |
| 68 | 8  | 0.109793  | -1.390329 | -0.170740 |
| 69 | 8  | 4.017715  | -2.310585 | 0.257228  |
| 70 | 8  | 2.130780  | 3.085246  | 0.820760  |
| 71 | 8  | 3.172643  | 2.600597  | -1.114210 |
| 72 | 8  | -0.196944 | 0.603787  | 3.630219  |
| 73 | 7  | -3.584223 | -0.024649 | 0.319241  |
| 74 | 7  | -1.390714 | 0.079285  | 0.623290  |
| 75 | 16 | -2.528362 | -2.123607 | -0.704677 |
| 76 | 14 | 3.498730  | -3.212665 | -1.079601 |

2,6-lutidine/2,6-dimethylpyridine (DMP):



Charge = 0 Multiplicity = 1

HF = -326.7824947 hartrees (-205059.283249197 kcal/mol)

Imaginary Frequencies: none found

Zero-point correction = 0.145307 (Hartree/Particle)

Temperature 298.150 Kelvin. Pressure 1.00000 Atm.

Sum of electronic and thermal Free Energies =

-326.669833 hartrees (-204988.58690583 kcal/mol)

Coordinates (from last standard orientation):

| Center<br>Number | Atomic<br>Number | Coordinates (Angstroms) |           |           |
|------------------|------------------|-------------------------|-----------|-----------|
|                  |                  | X                       | Y         | Z         |
| 1                | 6                | -1.160473               | -0.261946 | -0.004035 |
| 2                | 6                | -1.195166               | 1.131299  | -0.003236 |
| 3                | 6                | 0.008859                | 1.831739  | 0.000842  |
| 4                | 6                | 1.199720                | 1.121255  | 0.003073  |
| 5                | 6                | 1.149738                | -0.278042 | 0.001039  |
| 6                | 7                | -0.006143               | -0.949731 | -0.002114 |

|    |   |           |           |           |
|----|---|-----------|-----------|-----------|
| 7  | 1 | 0.013558  | 2.918072  | 0.001370  |
| 8  | 1 | -2.147267 | 1.652127  | -0.005575 |
| 9  | 1 | 2.159615  | 1.628875  | 0.005136  |
| 10 | 6 | 2.418847  | -1.088539 | -0.000521 |
| 11 | 1 | 3.018921  | -0.873332 | -0.891088 |
| 12 | 1 | 3.035787  | -0.852185 | 0.872816  |
| 13 | 1 | 2.182057  | -2.154074 | 0.013626  |
| 14 | 6 | -2.421617 | -1.082545 | 0.002318  |
| 15 | 1 | -2.405224 | -1.812259 | -0.812977 |
| 16 | 1 | -2.505201 | -1.644612 | 0.938663  |
| 17 | 1 | -3.308700 | -0.453813 | -0.104057 |

*Chloride anion (Cl<sup>-</sup>):*

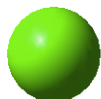

Charge = -1 Multiplicity = 1

HF = -460.31703 hartrees (-288853.5394953 kcal/mol)

Imaginary Frequencies: none found

Zero-point correction = 0.000000 (Hartree/Particle)

Temperature 298.150 Kelvin. Pressure 1.00000 Atm.

Sum of electronic and thermal Free Energies =

-460.332053 hartrees (-288862.96657803 kcal/mol)

Coordinates (from last standard orientation):

atom 1 is isolated, type=Cl

| Center<br>Number | Atomic<br>Number | Coordinates (Angstroms) |          |          |
|------------------|------------------|-------------------------|----------|----------|
|                  |                  | X                       | Y        | Z        |
| 1                | 17               | 0.000000                | 0.000000 | 0.000000 |

*Protonated 2,6-lutidine:*

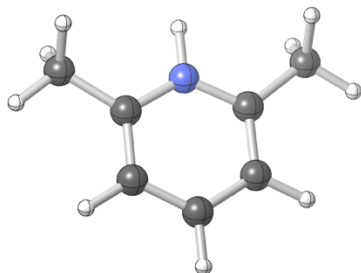

Charge = 1 Multiplicity = 1

HF = -327.2368823 hartrees (-205344.416012073 kcal/mol)

Imaginary Frequencies: none found

Zero-point correction = 0.159452 (Hartree/Particle)

Temperature 298.150 Kelvin. Pressure 1.00000 Atm.

Sum of electronic and thermal Free Energies =

-327.109815 hartrees (-205264.68001065 kcal/mol)

Coordinates (from last standard orientation):

| Center<br>Number | Atomic<br>Number | Coordinates (Angstroms) |           |           |
|------------------|------------------|-------------------------|-----------|-----------|
|                  |                  | X                       | Y         | Z         |
| 1                | 6                | 1.201400                | -0.224554 | -0.000015 |
| 2                | 6                | 1.208756                | 1.160921  | -0.000092 |
| 3                | 6                | 0.000000                | 1.851219  | -0.000080 |
| 4                | 6                | -1.208755               | 1.160921  | -0.000012 |
| 5                | 6                | -1.201400               | -0.224553 | 0.000024  |
| 6                | 7                | 0.000000                | -0.844275 | 0.000028  |
| 7                | 1                | 0.000001                | 2.936645  | -0.000116 |
| 8                | 1                | 2.157473                | 1.683848  | -0.000142 |
| 9                | 1                | -2.157473               | 1.683848  | -0.000001 |
| 10               | 1                | 0.000000                | -1.866334 | 0.000068  |
| 11               | 6                | -2.420240               | -1.085936 | -0.000100 |
| 12               | 1                | -2.434712               | -1.727254 | -0.886837 |
| 13               | 1                | -2.434389               | -1.728149 | 0.885984  |
| 14               | 1                | -3.316122               | -0.464886 | 0.000346  |
| 15               | 6                | 2.420240                | -1.085936 | 0.000205  |
| 16               | 1                | 2.434744                | -1.727083 | 0.887066  |
| 17               | 1                | 2.434356                | -1.728321 | -0.885754 |
| 18               | 1                | 3.316122                | -0.464886 | -0.000389 |

Enolate intermediate (INT):

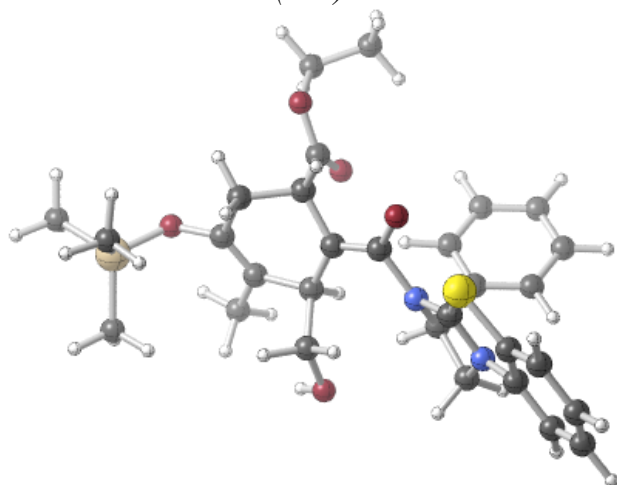

Charge = 0 Multiplicity = 1

HF = -2337.5007733 hartrees (-1466805.11025348 kcal/mol)

Imaginary Frequencies: none found

Zero-point correction = 0.619013 (Hartree/Particle)

Temperature 298.150 Kelvin. Pressure 1.00000 Atm.

Sum of electronic and thermal Free Energies =

-2336.955023 hartrees (-1466462.64648273 kcal/mol)

Coordinates (from last standard orientation):

| Center<br>Number | Atomic<br>Number | Coordinates (Angstroms) |           |           |
|------------------|------------------|-------------------------|-----------|-----------|
|                  |                  | X                       | Y         | Z         |
| 1                | 6                | -6.042990               | -1.841234 | 0.704217  |
| 2                | 6                | -4.930834               | -1.449894 | -0.033047 |
| 3                | 6                | -4.886078               | -1.588323 | -1.427973 |
| 4                | 6                | -5.970089               | -2.115606 | -2.118042 |
| 5                | 6                | -7.087767               | -2.511486 | -1.385510 |
| 6                | 6                | -7.120878               | -2.376951 | 0.005776  |
| 7                | 6                | -2.822350               | -0.654539 | -0.494133 |
| 8                | 6                | -3.158546               | -0.710344 | 1.771056  |
| 9                | 6                | -1.937728               | 0.166447  | 1.427690  |
| 10               | 6                | -2.172841               | 1.665752  | 1.478073  |
| 11               | 6                | -1.058673               | 2.510897  | 1.458580  |
| 12               | 6                | -3.452610               | 2.227464  | 1.489578  |
| 13               | 6                | -1.222097               | 3.892921  | 1.470001  |
| 14               | 6                | -3.614001               | 3.611939  | 1.501800  |
| 15               | 6                | -2.500203               | 4.447965  | 1.496820  |



|    |   |           |           |           |
|----|---|-----------|-----------|-----------|
| 16 | 6 | -0.556775 | 0.128110  | -0.904758 |
| 17 | 6 | 0.724008  | 0.086505  | -0.409126 |
| 18 | 6 | 1.769383  | 0.681221  | -1.312115 |
| 19 | 6 | 1.172417  | -0.421523 | 0.949001  |
| 20 | 6 | 3.041883  | -0.179583 | -1.360952 |
| 21 | 6 | 0.577264  | -1.818080 | 1.307505  |
| 22 | 6 | 3.507918  | -0.483509 | 0.037380  |
| 23 | 6 | 7.455654  | -1.745918 | -0.016473 |
| 24 | 6 | 5.130649  | -2.853746 | -1.715407 |
| 25 | 6 | 5.143529  | -3.319453 | 1.301767  |
| 26 | 6 | 2.684833  | -0.523976 | 1.092299  |
| 27 | 6 | 2.164515  | 2.089011  | -0.874219 |
| 28 | 6 | 3.322775  | 4.044957  | -1.541943 |
| 29 | 6 | 2.211647  | 5.045484  | -1.791956 |
| 30 | 6 | 3.195372  | -0.769532 | 2.486696  |
| 31 | 1 | -6.059302 | -1.731672 | 1.783765  |
| 32 | 1 | -5.945798 | -2.221457 | -3.198134 |
| 33 | 1 | -7.942318 | -2.932139 | -1.905199 |
| 34 | 1 | -8.001966 | -2.693192 | 0.554720  |
| 35 | 1 | -3.853463 | -0.236480 | 2.464203  |
| 36 | 1 | -2.848468 | -1.685747 | 2.159922  |
| 37 | 1 | -0.057030 | 2.093539  | 1.403395  |
| 38 | 1 | -4.337602 | 1.596951  | 1.488132  |
| 39 | 1 | -0.345955 | 4.534532  | 1.459525  |
| 40 | 1 | -4.614108 | 4.034825  | 1.515321  |
| 41 | 1 | -2.628562 | 5.526226  | 1.510175  |
| 42 | 1 | -1.094820 | -0.116526 | 2.056034  |
| 43 | 1 | 0.851010  | 0.253740  | 1.762389  |
| 44 | 1 | 2.827132  | -1.102287 | -1.914678 |
| 45 | 1 | 3.847753  | 0.338047  | -1.892391 |
| 46 | 1 | 1.361439  | 0.776736  | -2.322504 |
| 47 | 1 | -0.321931 | -2.019446 | 0.723684  |
| 48 | 1 | 1.307982  | -2.599989 | 1.050840  |
| 49 | 1 | 7.733020  | -1.062914 | -0.826872 |
| 50 | 1 | 7.745659  | -1.279021 | 0.931038  |
| 51 | 1 | 8.045491  | -2.662271 | -0.133280 |
| 52 | 1 | 4.075121  | -3.148418 | -1.727480 |
| 53 | 1 | 5.297014  | -2.149113 | -2.537723 |
| 54 | 1 | 5.724046  | -3.752808 | -1.922487 |
| 55 | 1 | 5.446537  | -2.958937 | 2.290482  |
| 56 | 1 | 4.060237  | -3.487368 | 1.314931  |
| 57 | 1 | 5.624345  | -4.291817 | 1.138364  |
| 58 | 1 | 4.164886  | 4.211820  | -2.216911 |
| 59 | 1 | 3.677961  | 4.090640  | -0.509581 |
| 60 | 1 | 2.581589  | 6.061059  | -1.619760 |
| 61 | 1 | 1.858985  | 4.976316  | -2.825121 |

|    |    |           |           |           |
|----|----|-----------|-----------|-----------|
| 62 | 1  | 1.369462  | 4.862693  | -1.119746 |
| 63 | 1  | 3.012545  | -1.801828 | 2.819465  |
| 64 | 1  | 4.272678  | -0.599357 | 2.550662  |
| 65 | 1  | 2.698597  | -0.100734 | 3.201092  |
| 66 | 8  | -0.970444 | 0.397742  | -2.065345 |
| 67 | 8  | 4.871940  | -0.639241 | 0.172409  |
| 68 | 8  | 1.901384  | 2.612165  | 0.186486  |
| 69 | 8  | 2.885651  | 2.705829  | -1.828162 |
| 70 | 8  | 0.174949  | -1.932306 | 2.666465  |
| 71 | 7  | -3.753116 | -0.884653 | 0.441817  |
| 72 | 7  | -1.674083 | -0.244295 | 0.005698  |
| 73 | 16 | -3.349752 | -0.988784 | -2.101944 |
| 74 | 14 | 5.627857  | -2.127535 | -0.060273 |
| 75 | 1  | 0.952096  | -1.778292 | 3.225708  |
